# Supplementary material
Source: ML conference proceedings conference paper supplement (https://openreview.net/forum?id=vxiyM9HJw4)

comparison of  $-\log(\text{stretch})$ ,  $T=0.1$

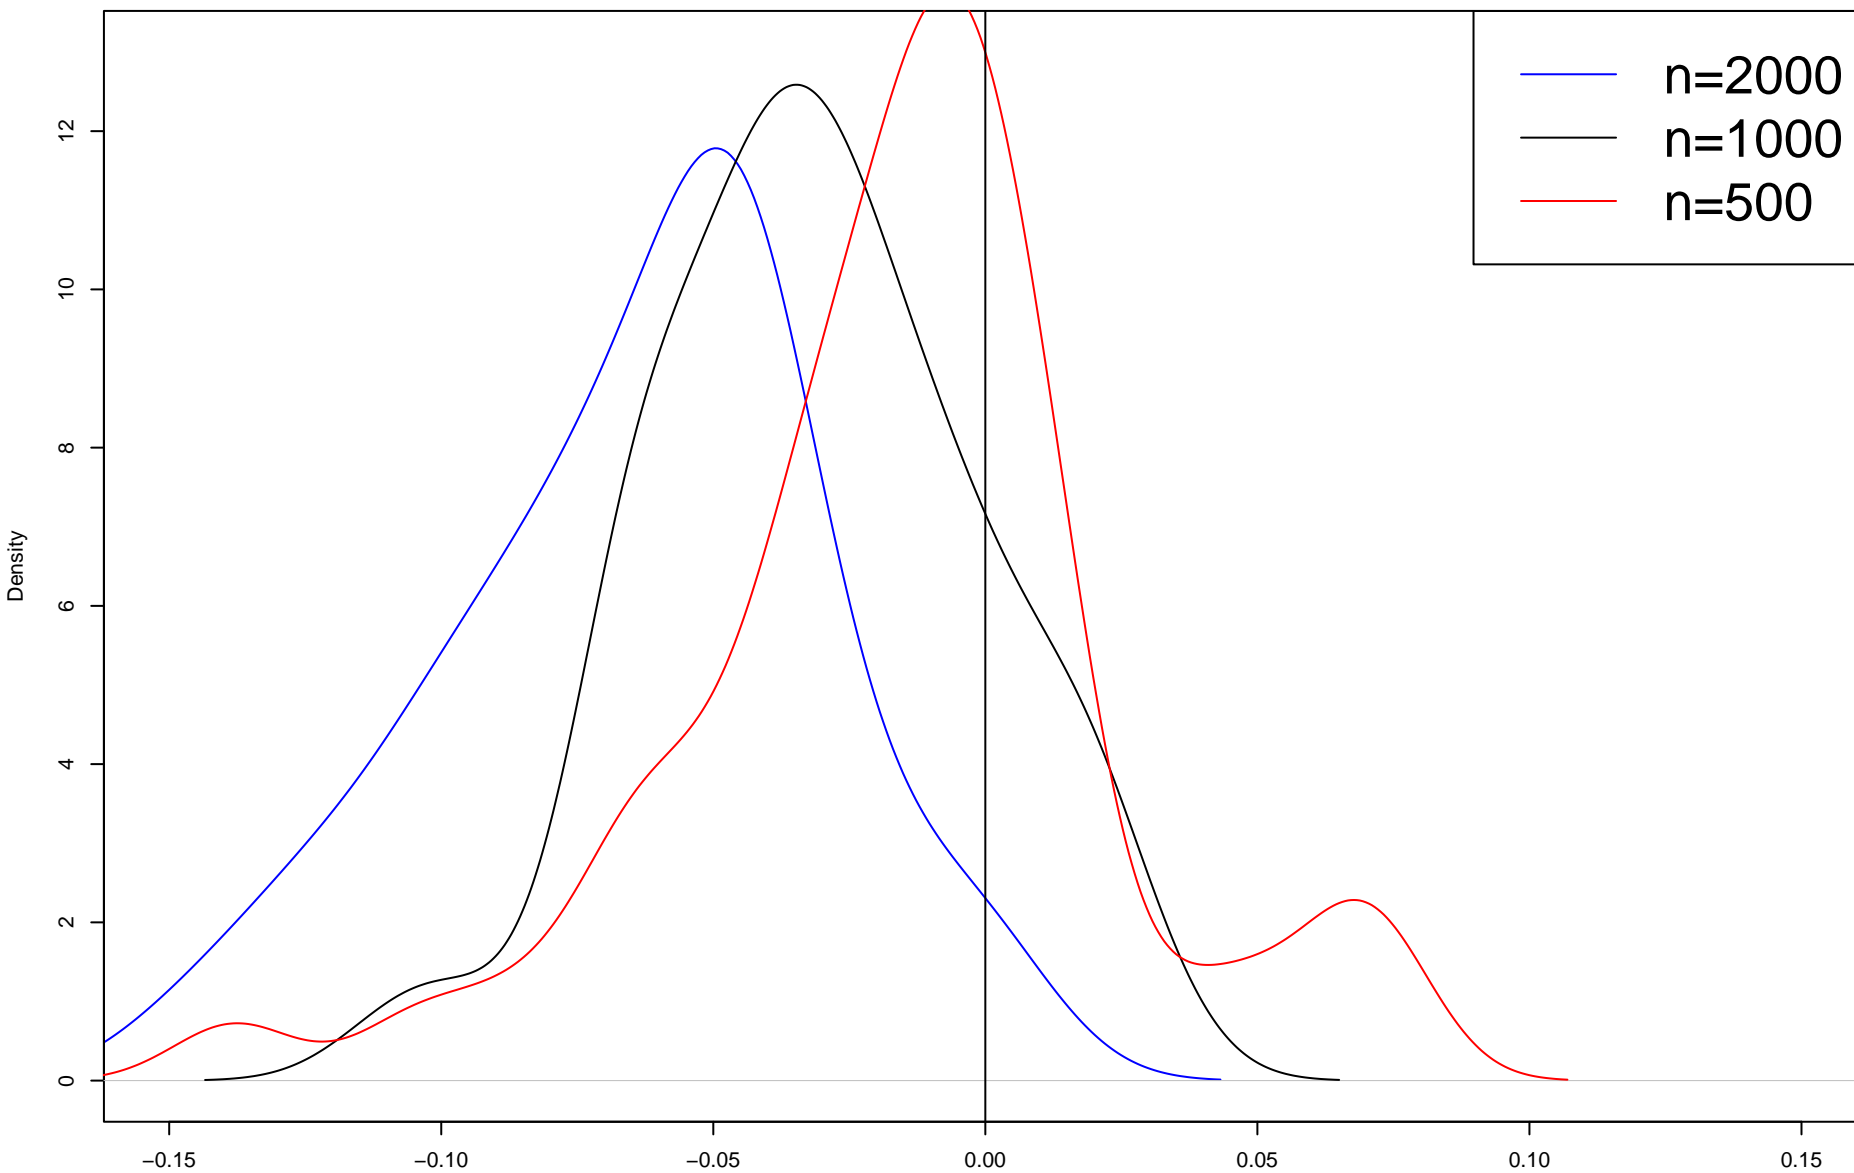

comparison of  $-\log(\text{stretch})$ ,  $T=0.4$

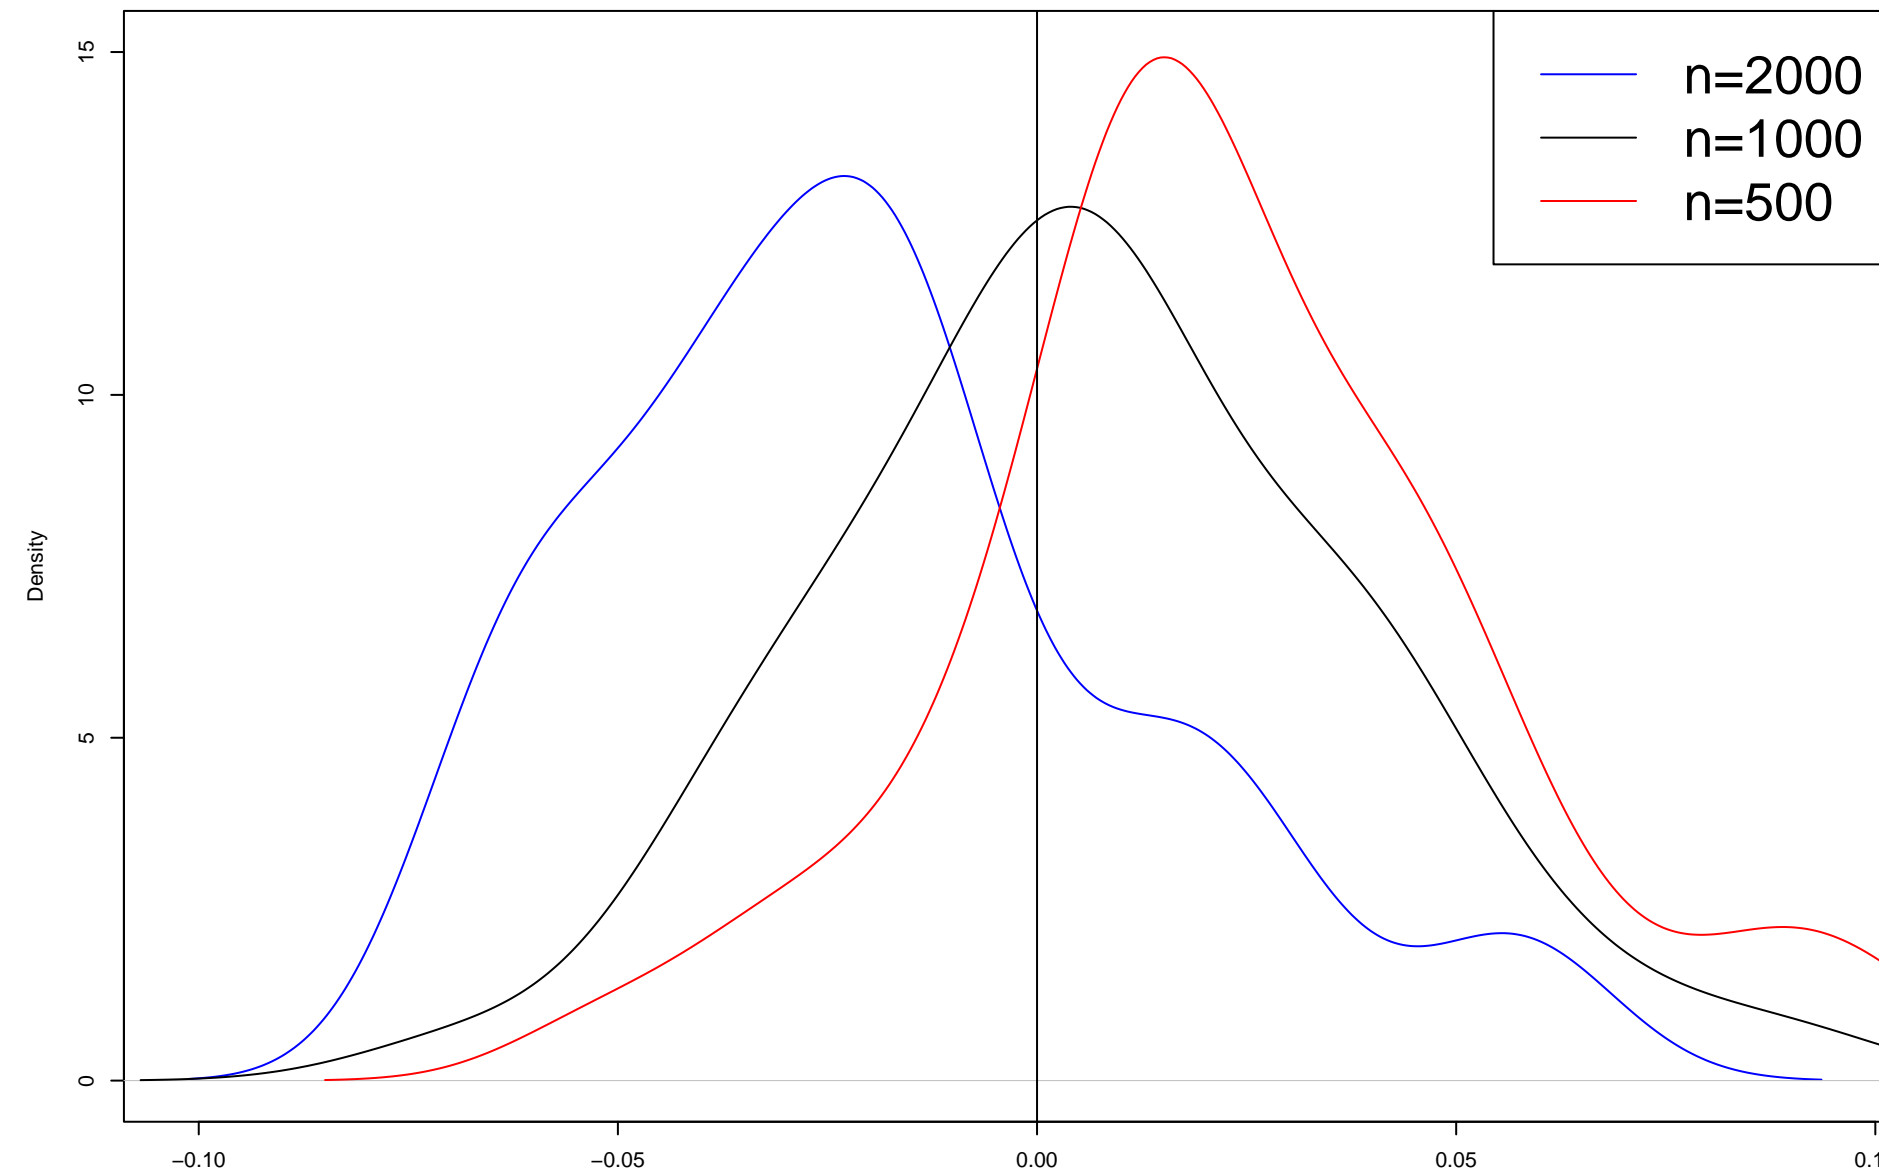

comparison of  $-\log(\text{stretch})$ ,  $T=0.7$

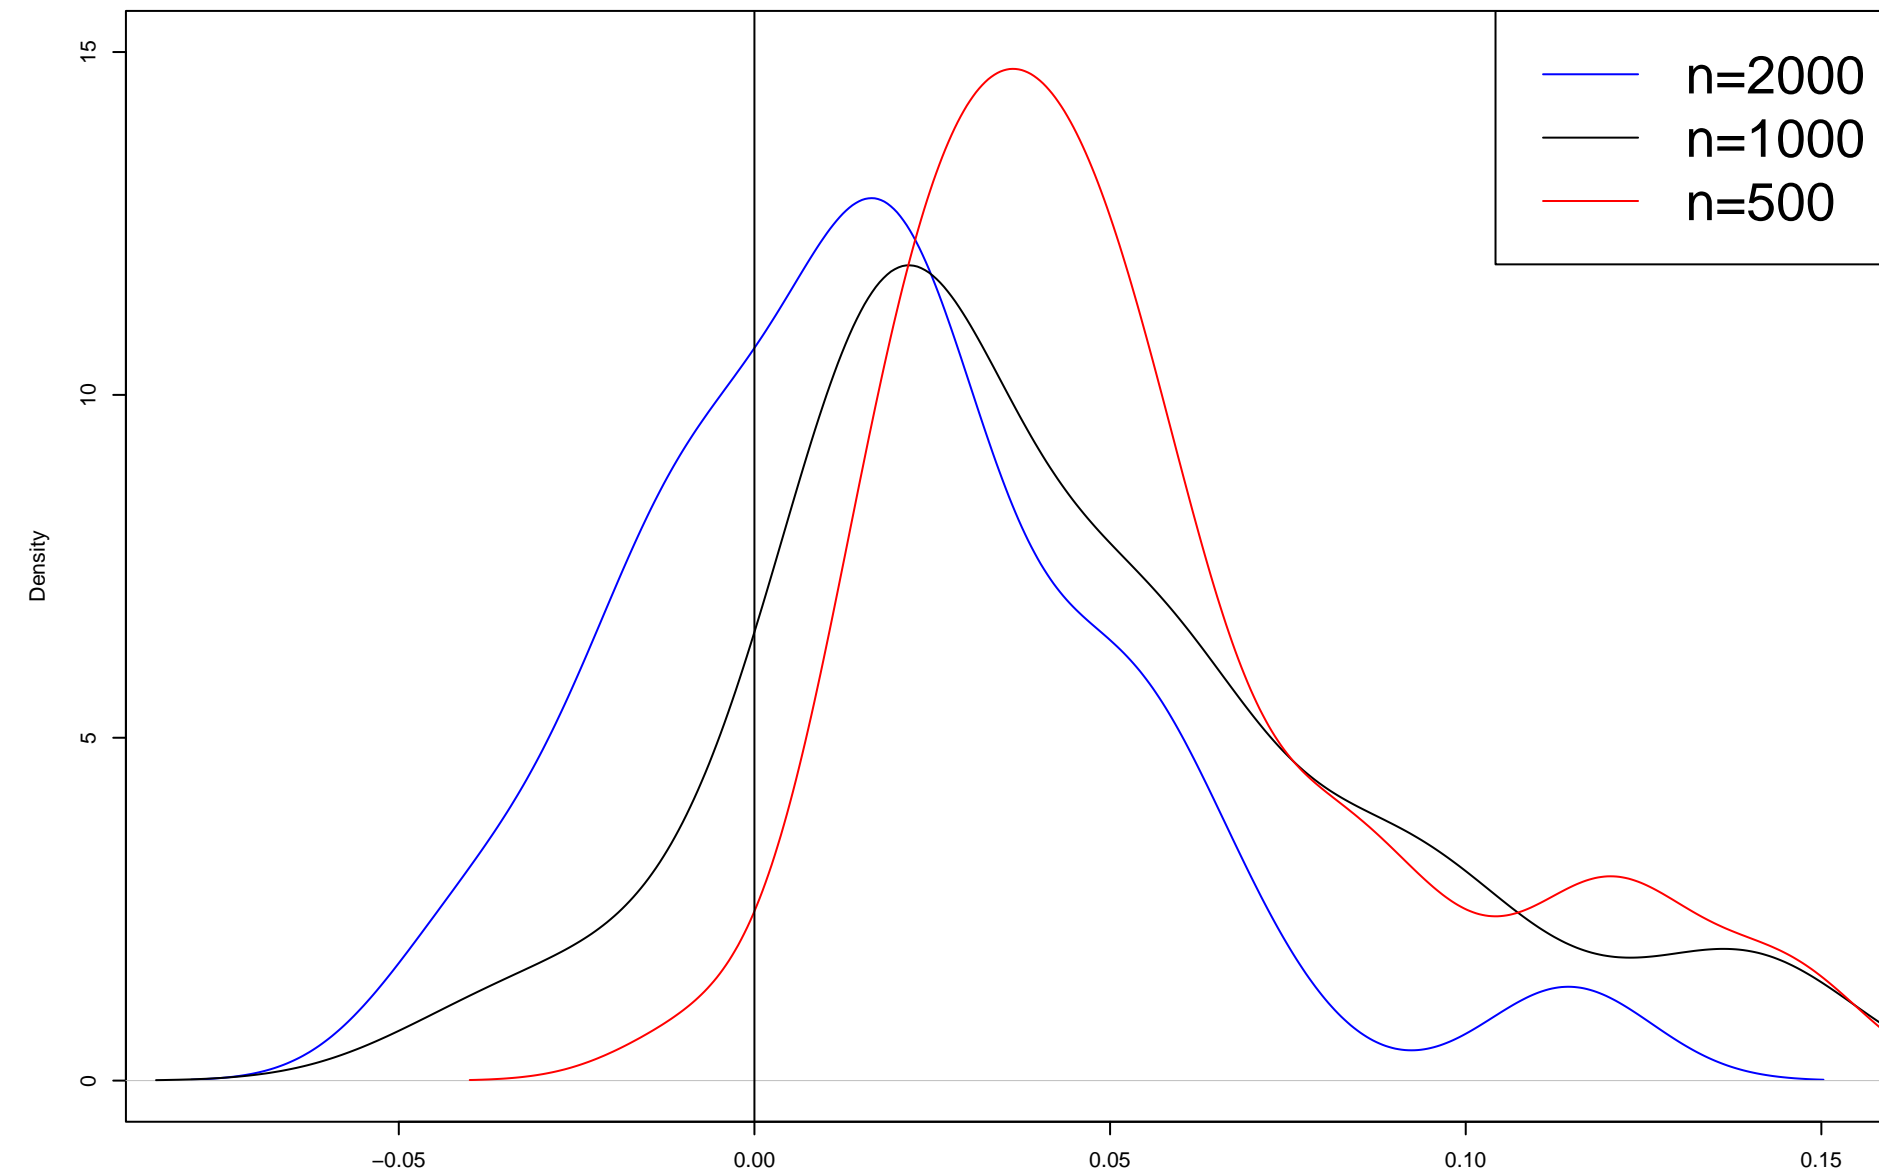

Supplement: supplementary_material [file densities_stretch.pdf › bridging/tables/densities_stretch.pdf]
