# Supplementary material
Source: ML conference proceedings conference paper supplement (https://openreview.net/forum?id=vxiyM9HJw4)
Supplement: supplementary_material [file real-world_MAP_ranking_conn.pdf › bridging/tables/real-world_MAP_ranking_conn.pdf]

ranks of MAP

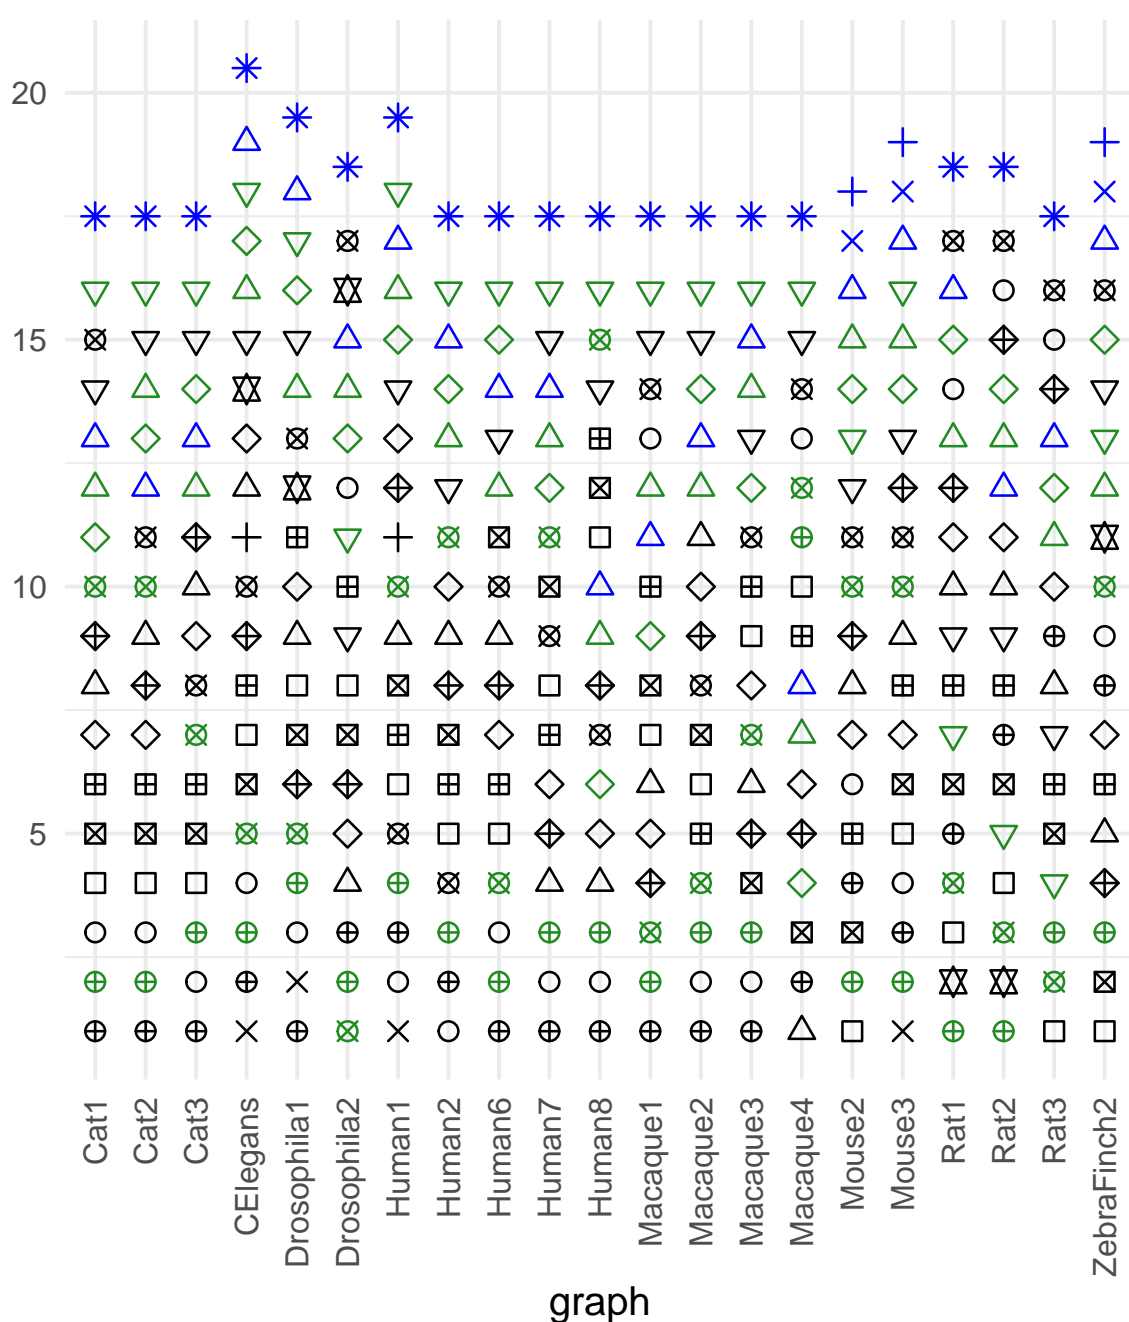

name

- BFKL
- BFKL+DHRG
- Penalty
- Lorentz2D
- Lorentz2D+DHRG
- Lorentz3D
- Poincare2D
- Poincare3D
- Poincare5D
- Mercator fast
- Mercator full
- d-Mercator
- Anneal2D
- Anneal3D
- LTiling
- TreeRep
- Euclidean200D
- Euclidean50D
- Coalescent2
- Coalescent3
- KVK
