# Supplementary material
Source: ML conference proceedings conference paper supplement (https://openreview.net/forum?id=vxiyM9HJw4)
Supplement: supplementary_material [file real-world_MR_ranking.pdf › bridging/tables/real-world_MR_ranking.pdf]

ranks of IMR

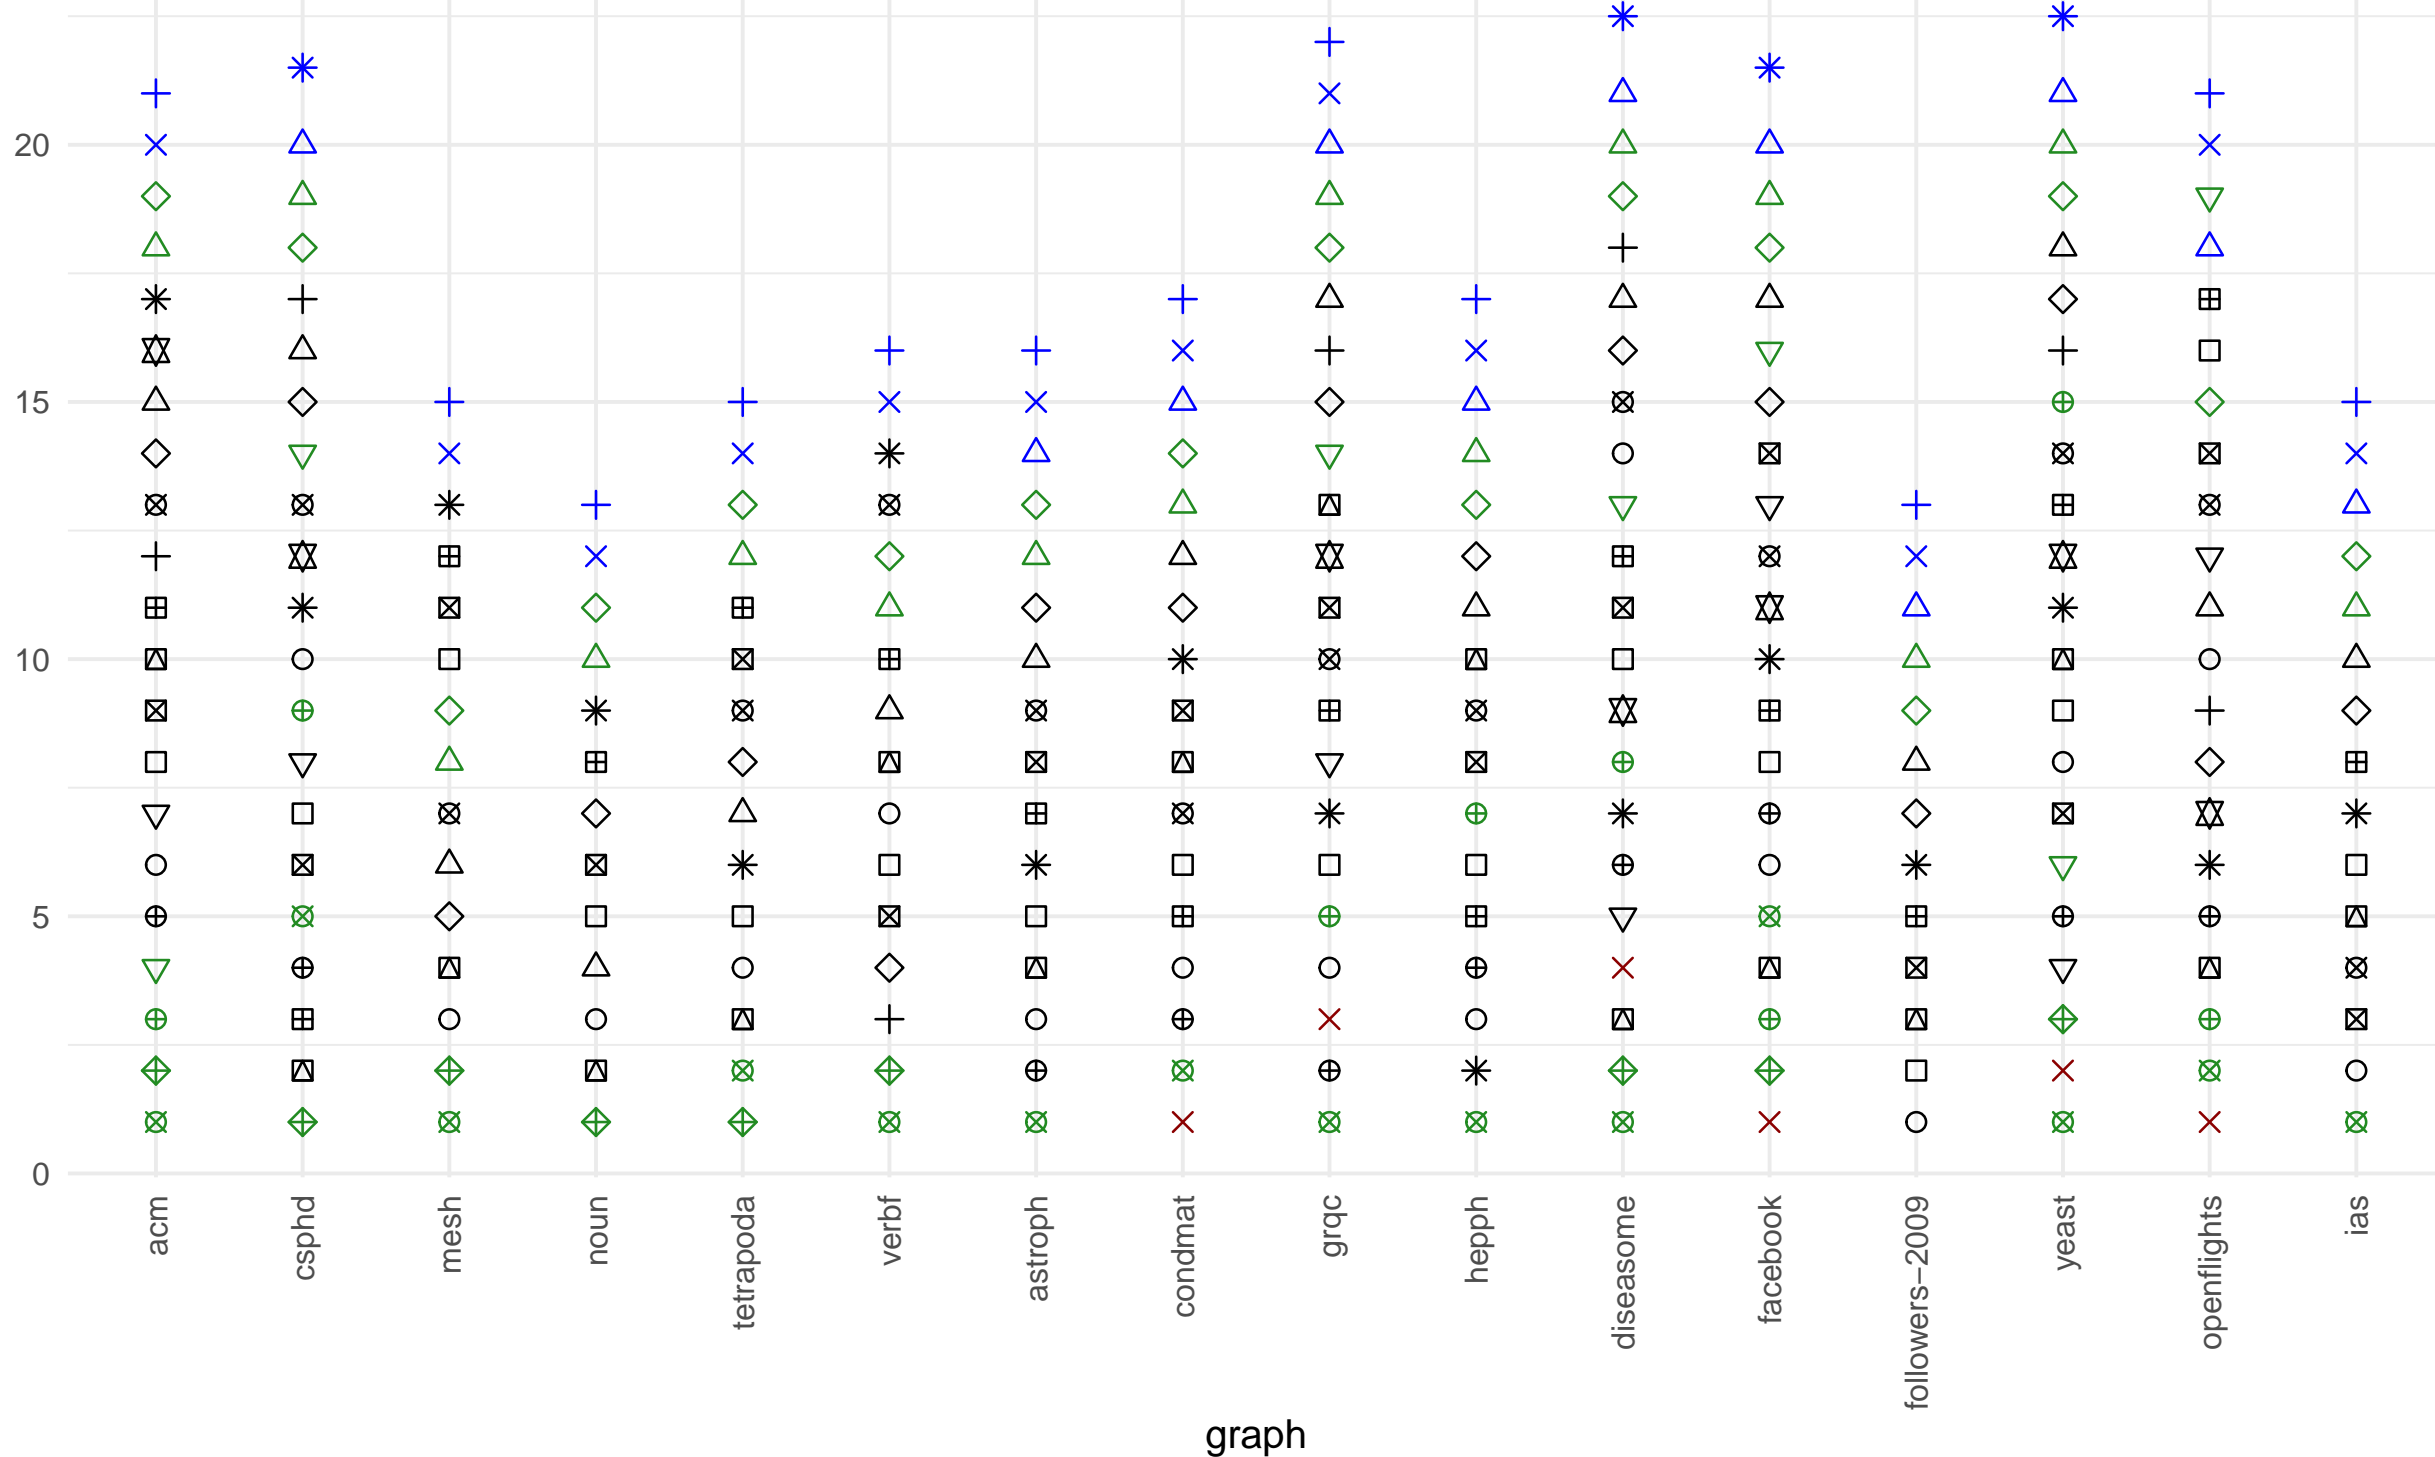

name

- BFKL
- ▣ BFKL+DHRG
- ⊠ Penalty
- ◇ Lorentz2D
- ◊ Lorentz3D
- △ Poincare2D
- ▲ Poincare3D
- ▴ Poincare5D
- Mercator fast
- ⊗ Mercator full
- ⊠ d-Mercator
- ▽ Anneal2D
- ▼ Anneal3D
- ⊕ LTiling
- ✕ TreeRep
- ⊕ Euclidean200D
- ✕ Euclidean50D
- ⊕ Coalescent2
- ⊕ Coalescent3
- ⊠ KVK
- ⋆ HypCLOVE
- ⊠ LPCS
- ⊠ HypViewer
