# Supplementary material
Source: ML conference proceedings conference paper supplement (https://openreview.net/forum?id=vxiyM9HJw4)
Supplement: supplementary_material [file real-world_success_conn.pdf › bridging/tables/real-world_success_conn.pdf]

Greedy success rate

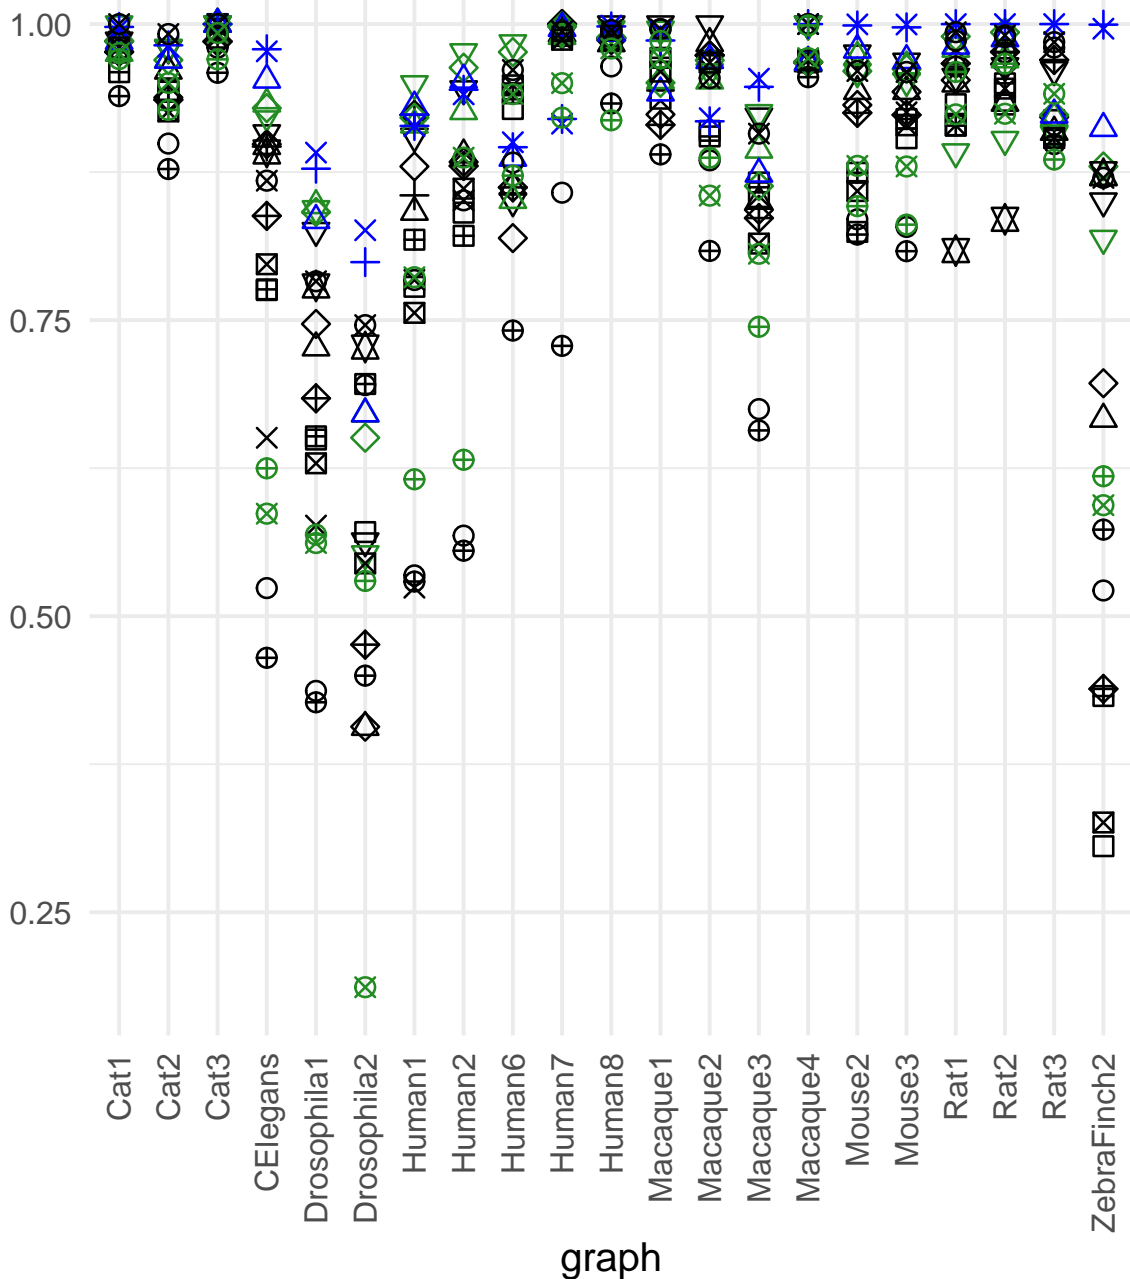

name

- |                  |                 |
|------------------|-----------------|
| □ BFKL           | ⊗ d-Mercator    |
| ▤ BFKL+DHRG      | ▽ Anneal2D      |
| ⊠ Penalty        | ▽ Anneal3D      |
| ◇ Lorentz2D      | + LTiling       |
| ⬠ Lorentz2D+DHRG | × TreeRep       |
| ◇ Lorentz3D      | + Euclidean200D |
| △ Poincare2D     | × Euclidean50D  |
| △ Poincare3D     | ⊕ Coalescent2   |
| △ Poincare5D     | ⊕ Coalescent3   |
| ○ Mercator fast  | ⋈ KVK           |
| ⊗ Mercator full  |                 |
