# Supplementary material
Source: ML conference proceedings conference paper supplement (https://openreview.net/forum?id=vxiyM9HJw4)

**comparison of MAP,  $T=0.1$**

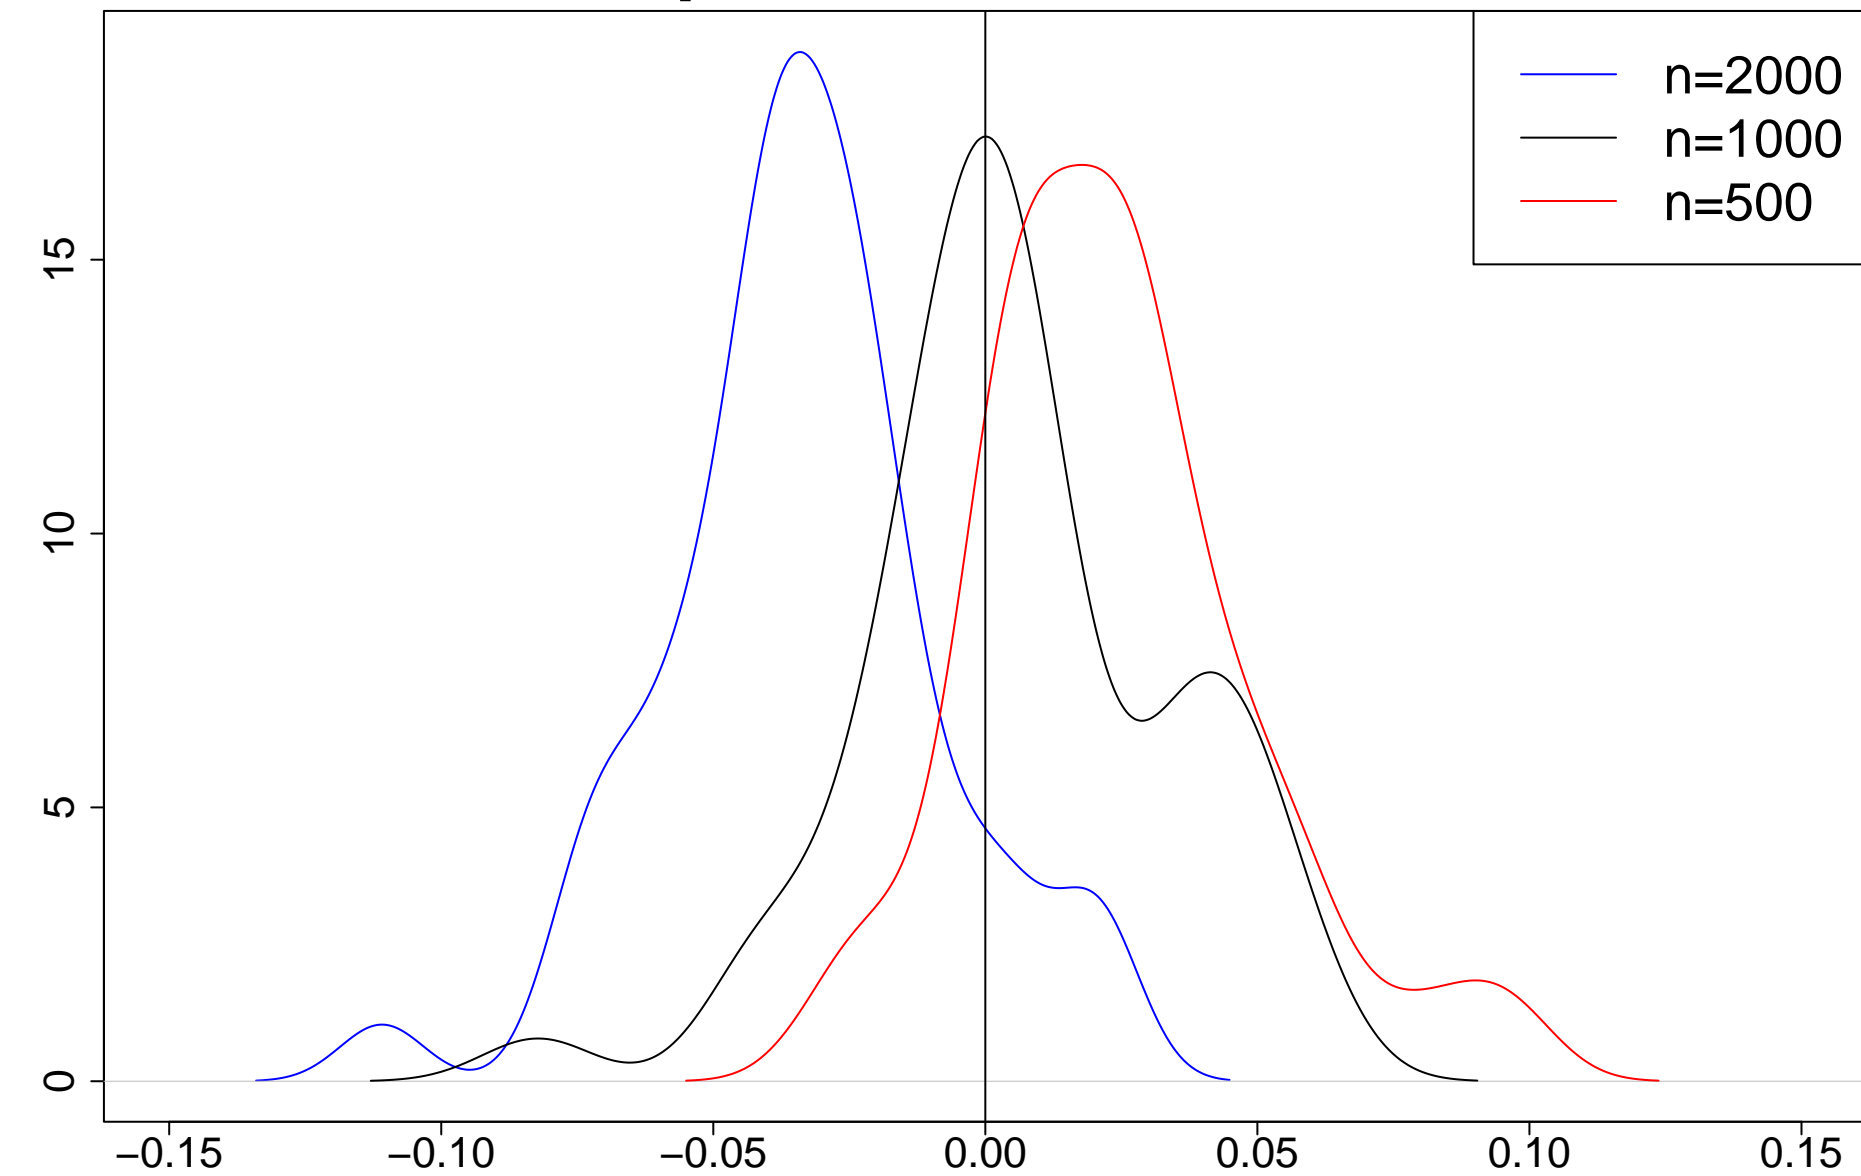

**comparison of MAP,  $T=0.4$**

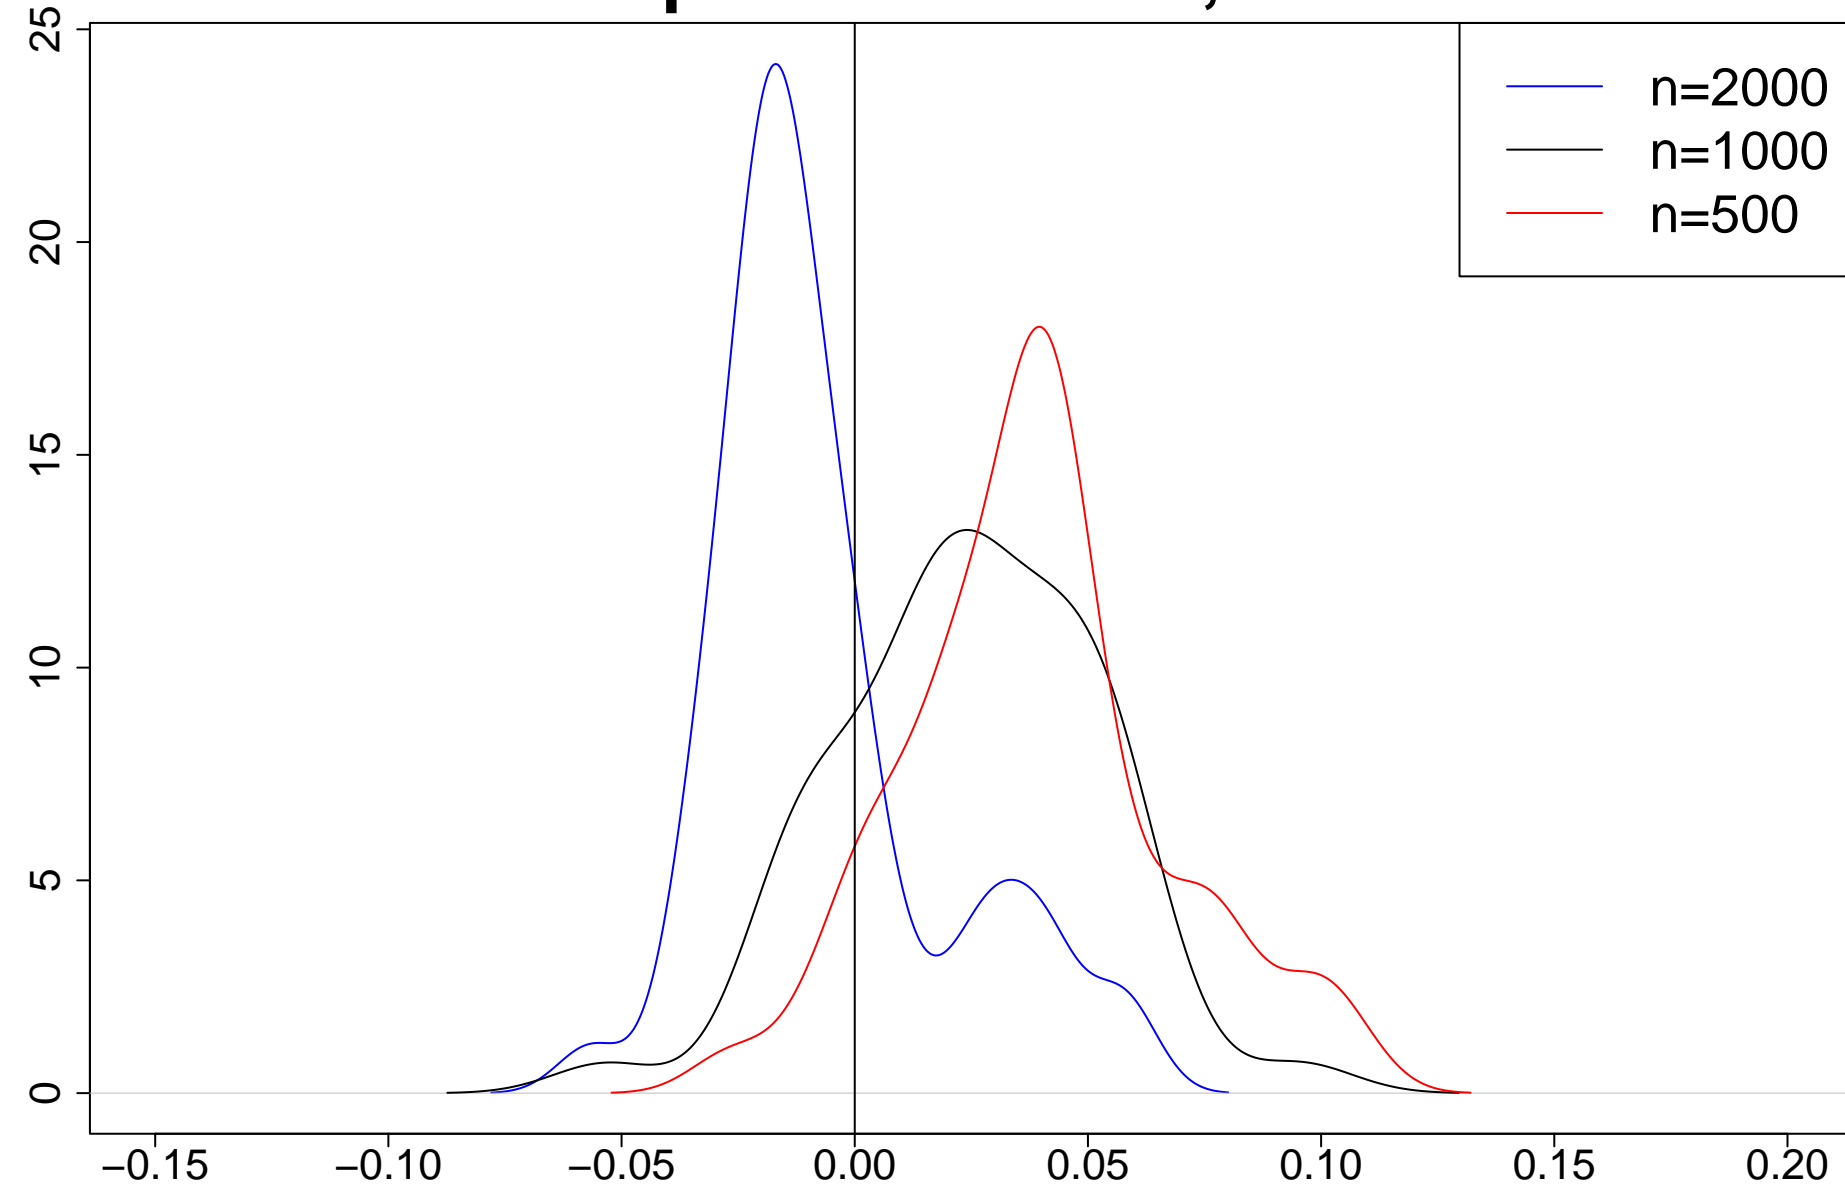

**comparison of MAP,  $T=0.7$**

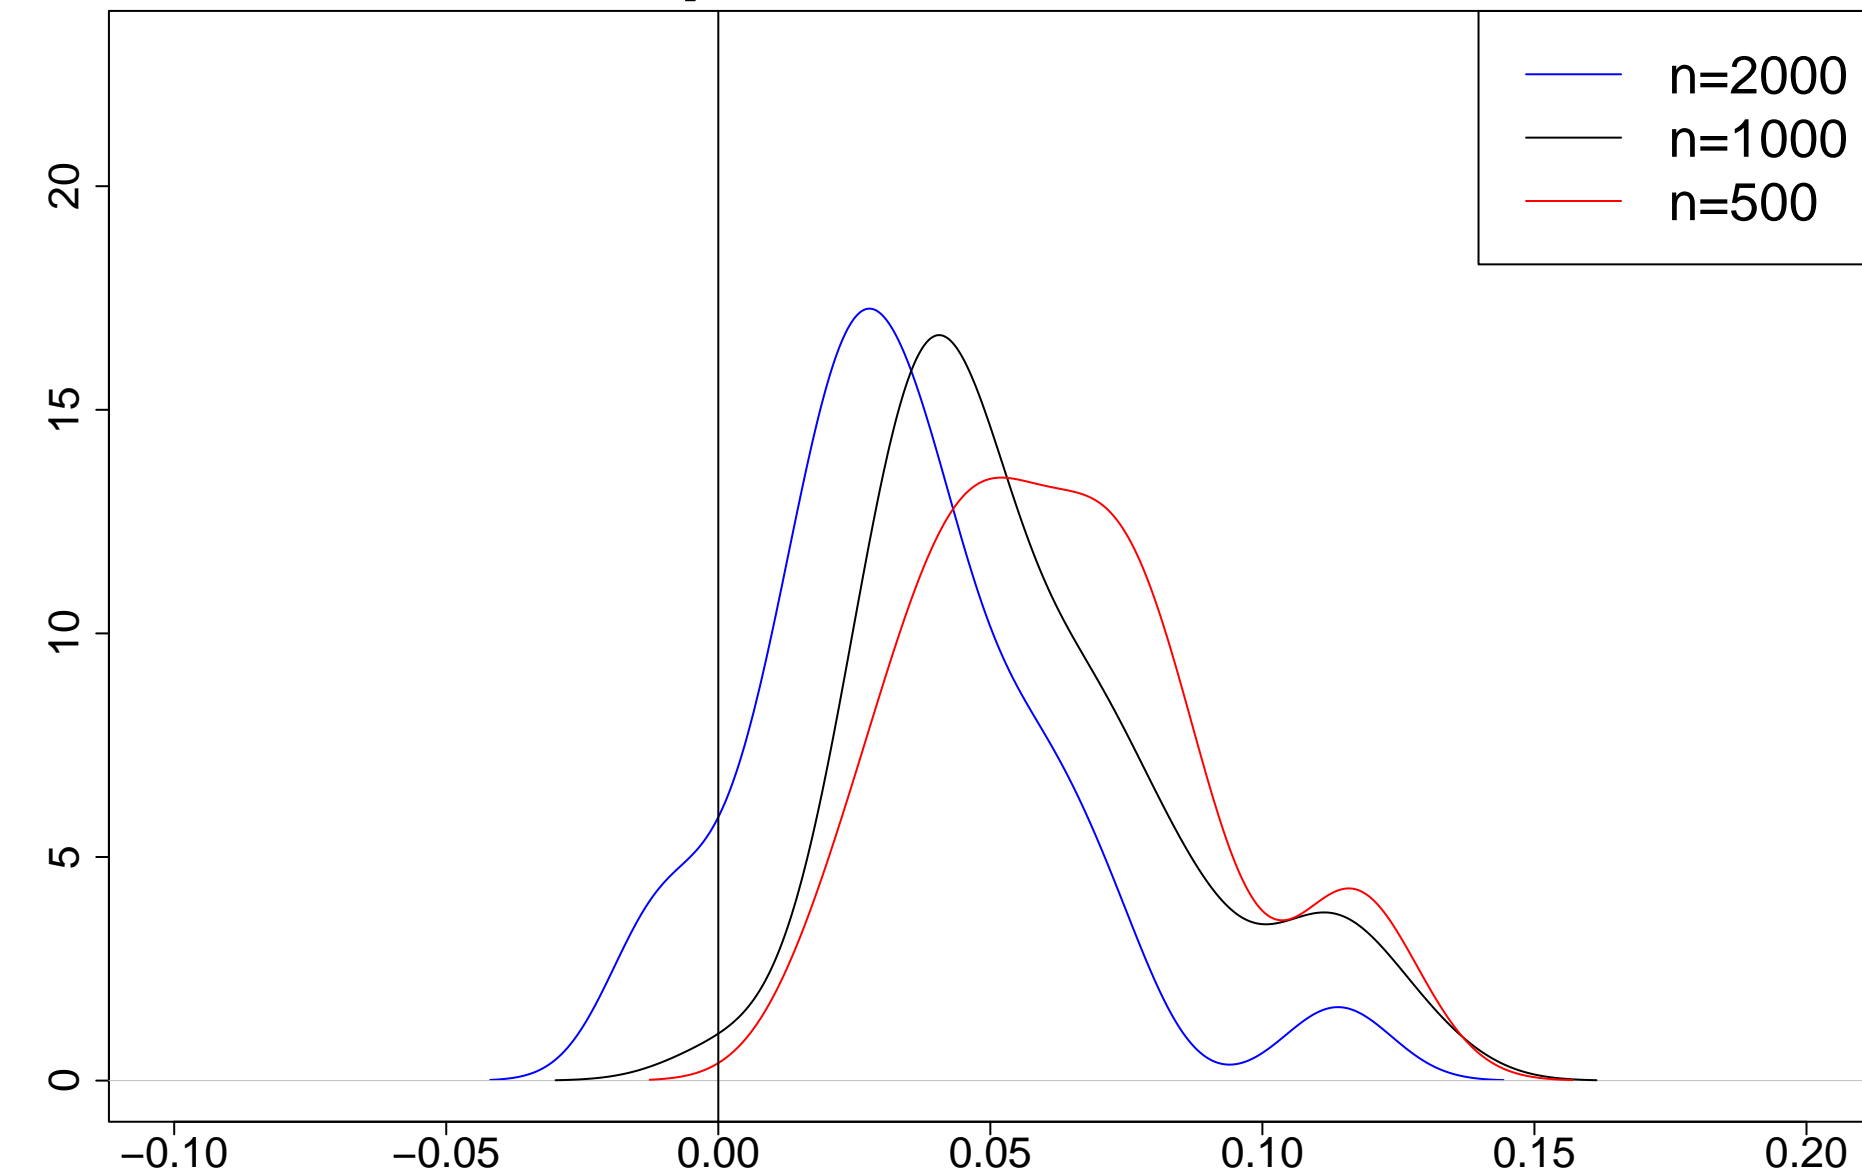

Supplement: supplementary_material [file densities_MAP.pdf › bridging/tables/densities_MAP.pdf]

comparison of  $-\log(\text{MR})$ ,  $T=0.1$

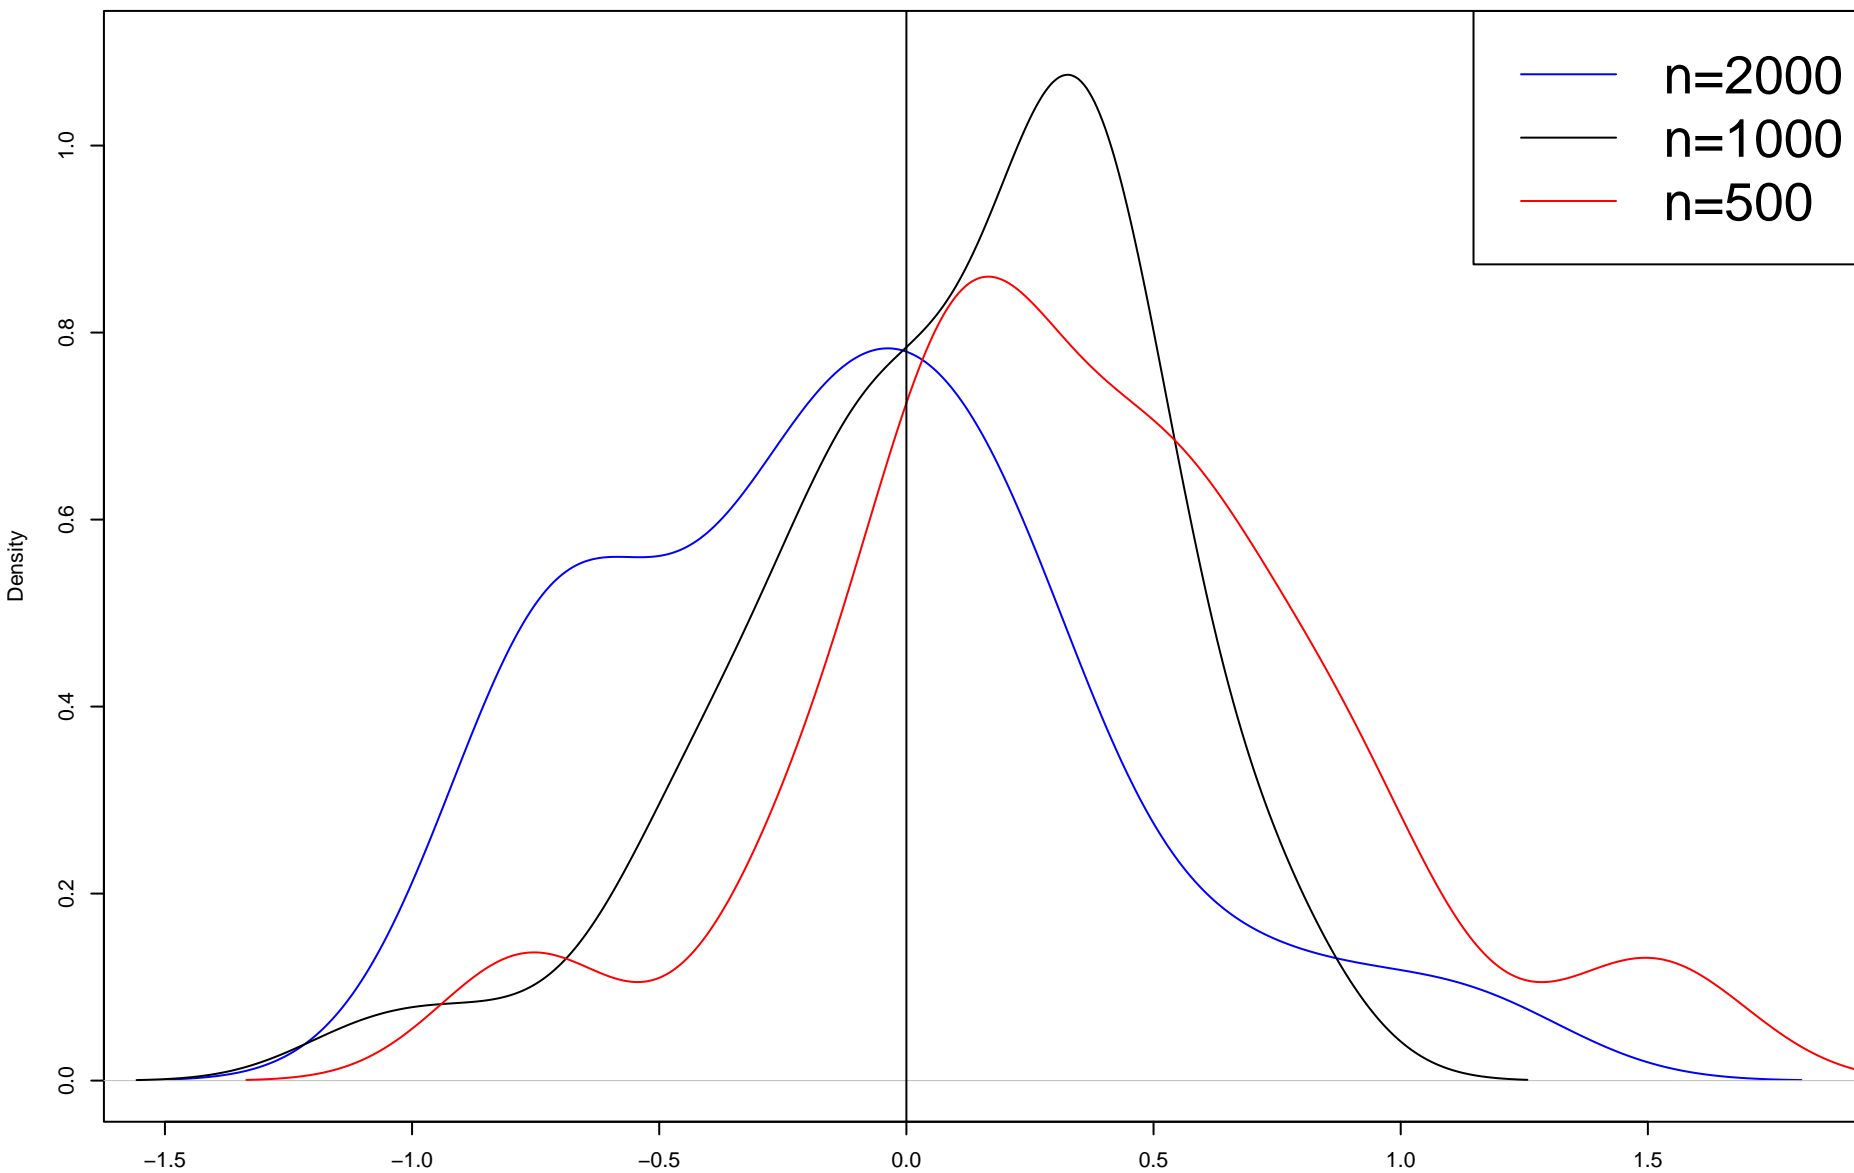

comparison of  $-\log(\text{MR})$ ,  $T=0.4$

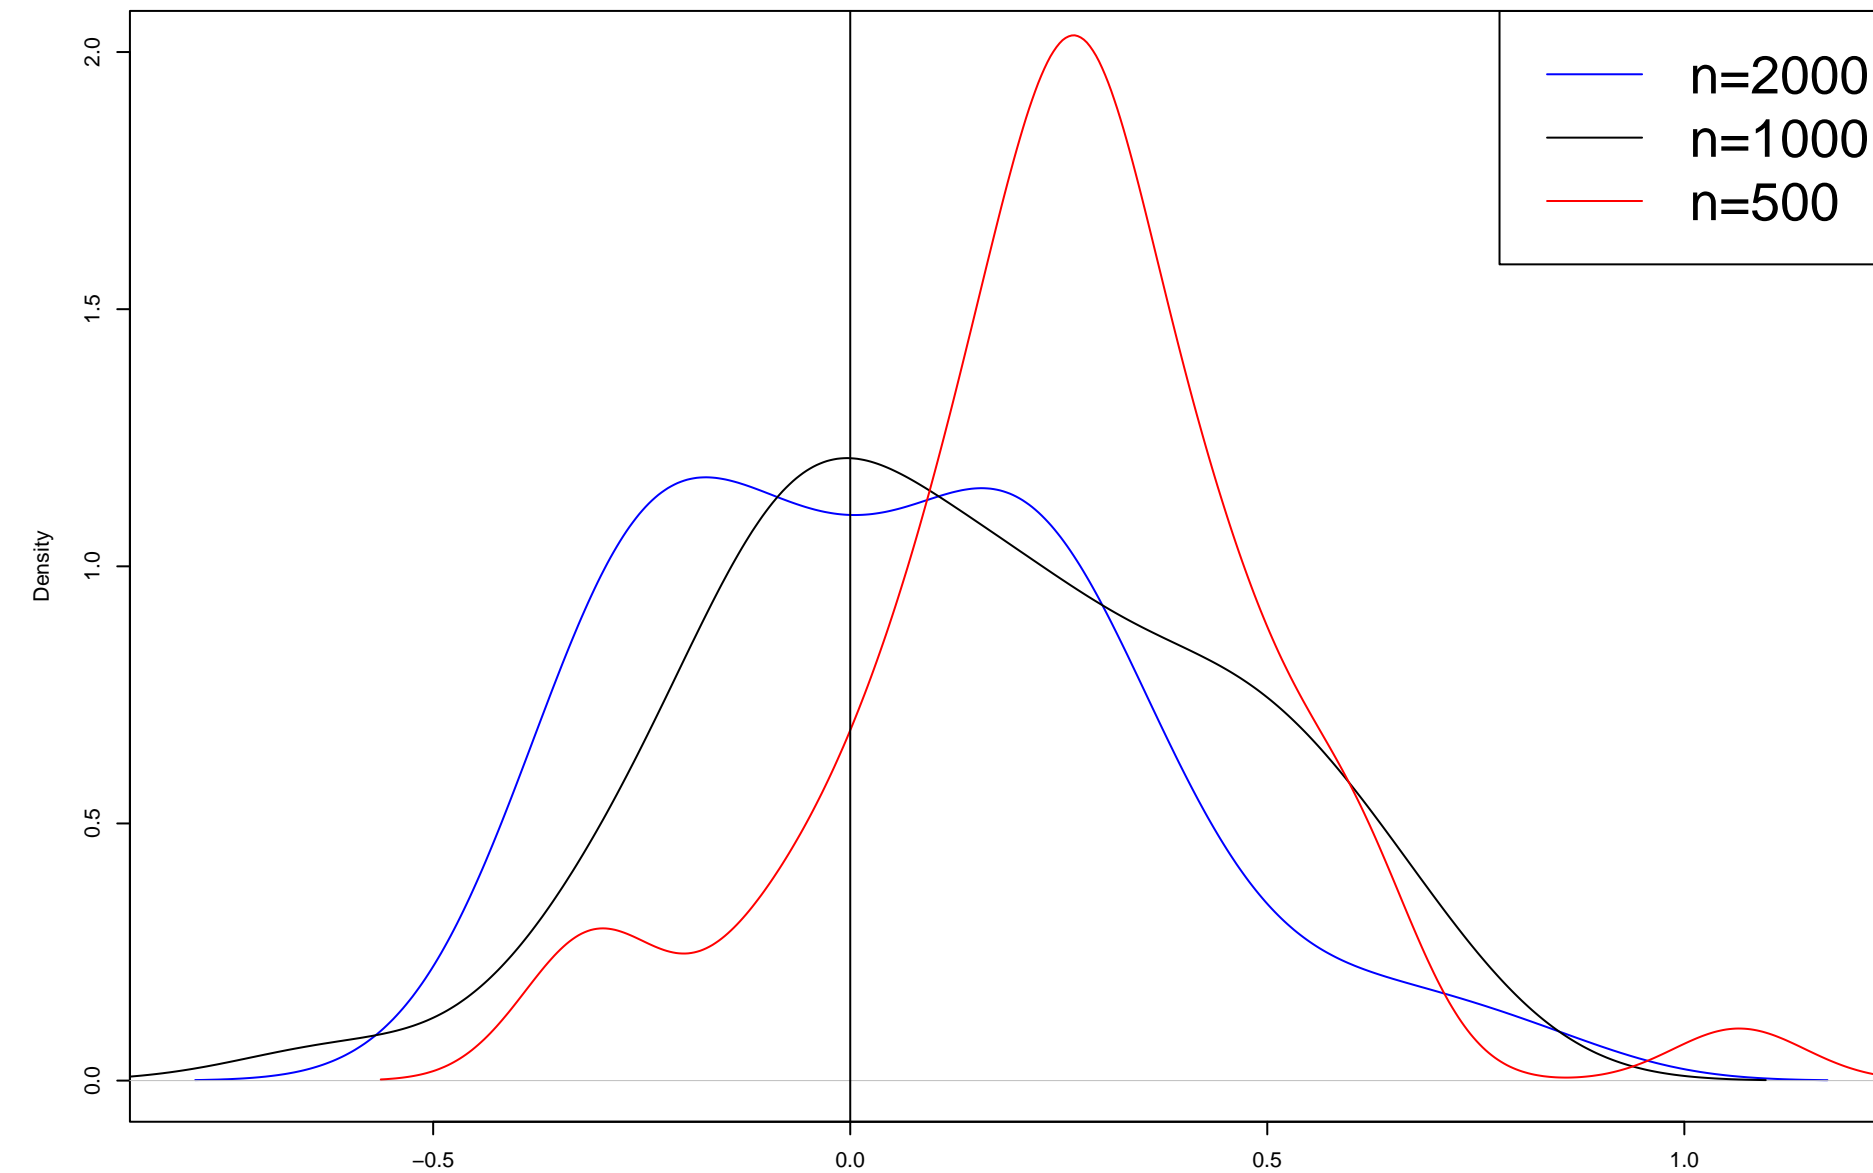

comparison of  $-\log(\text{MR})$ ,  $T=0.7$

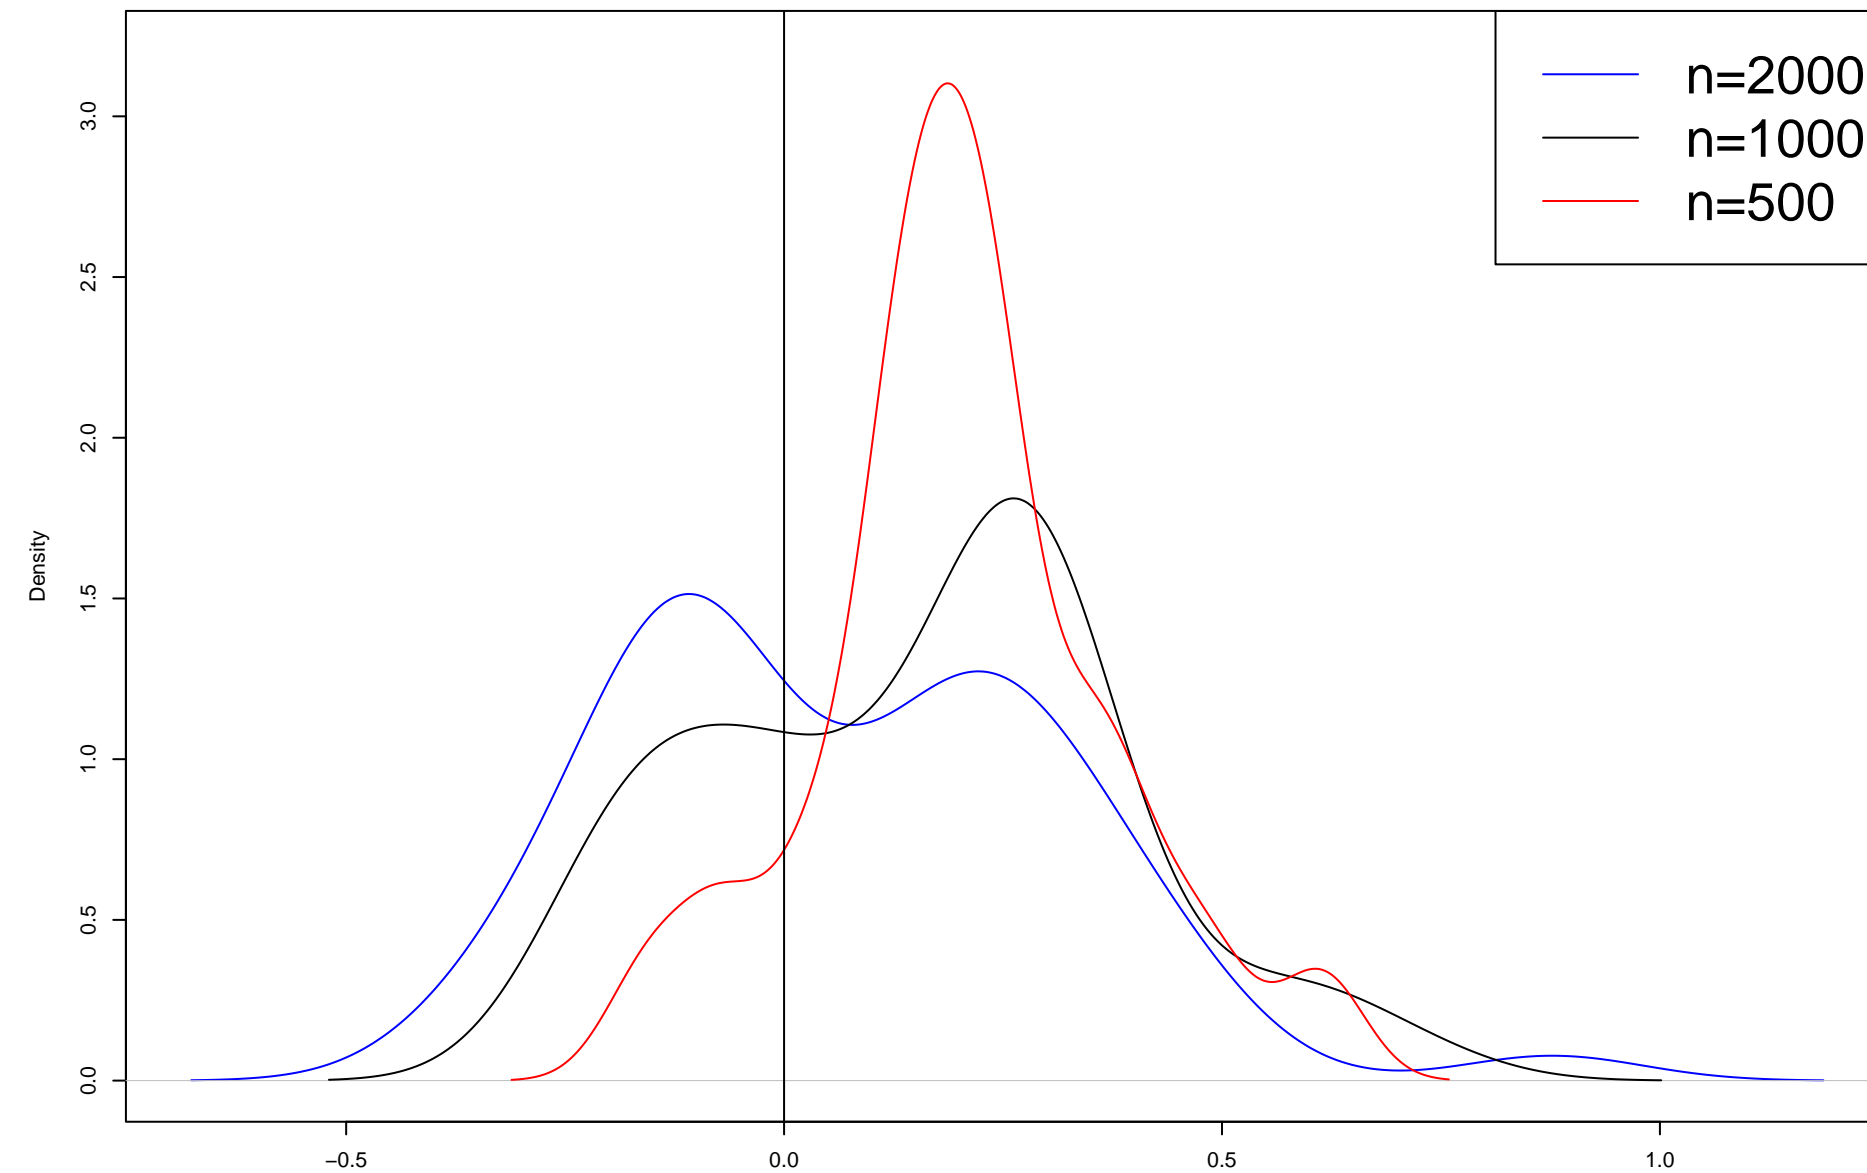

Supplement: supplementary_material [file densities_MR.pdf › bridging/tables/densities_MR.pdf]

comparison of control, T=0.1

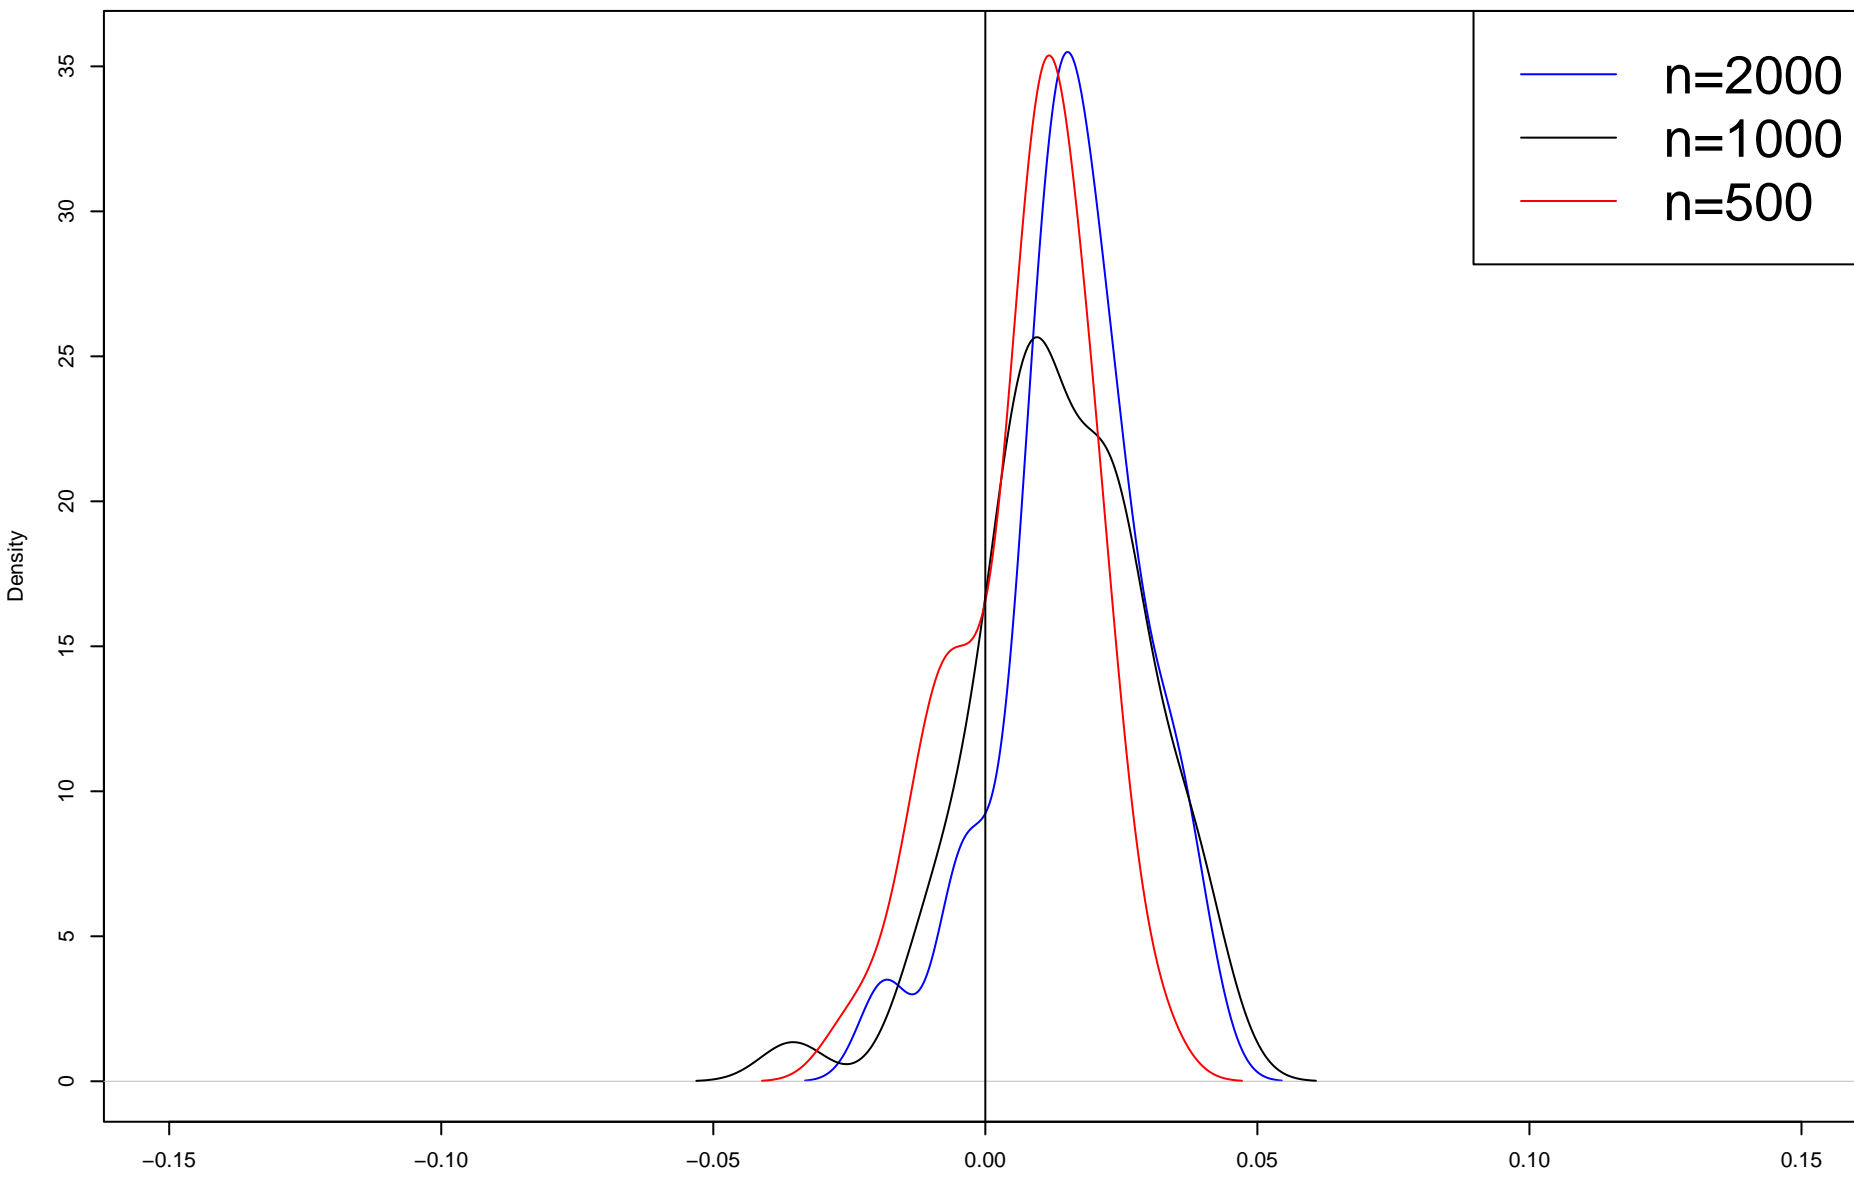

comparison of control, T=0.4

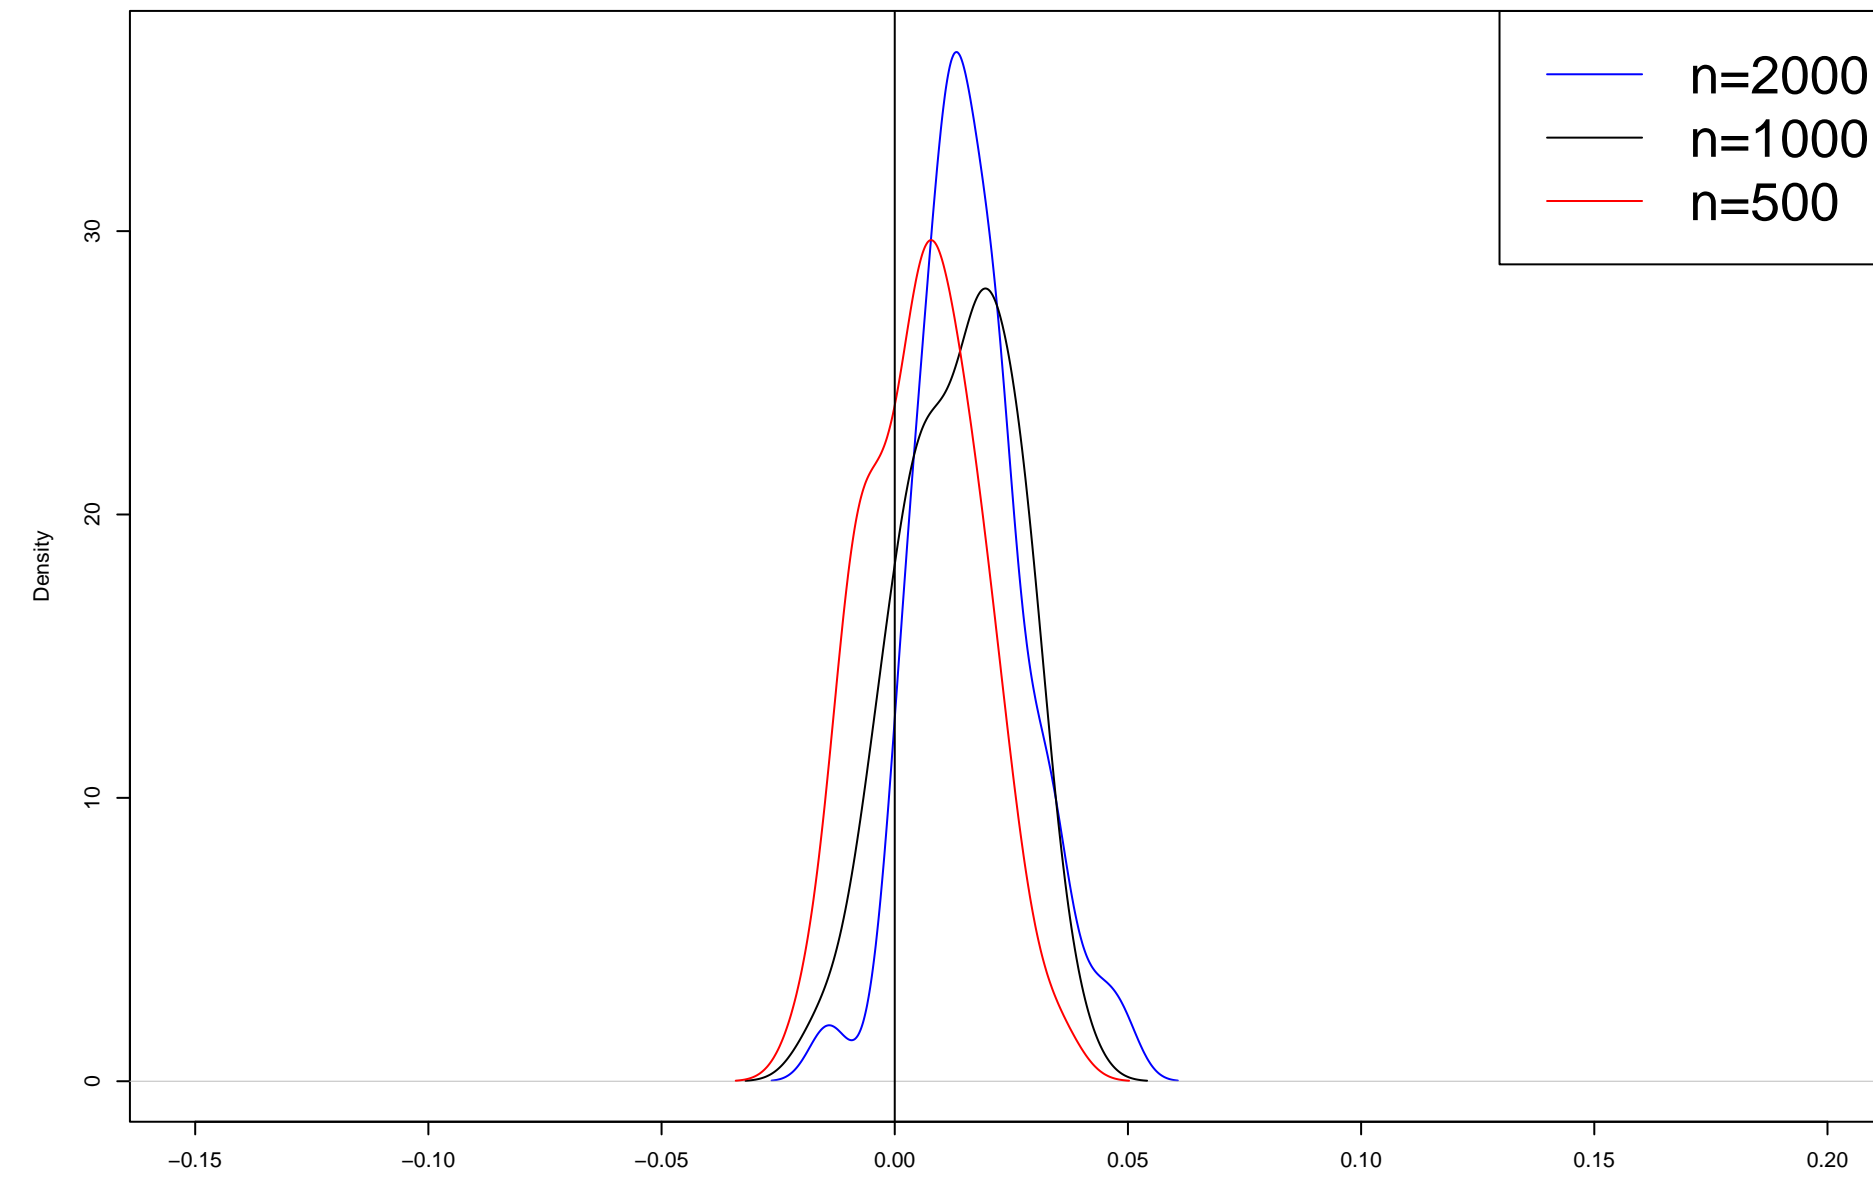

comparison of control, T=0.7

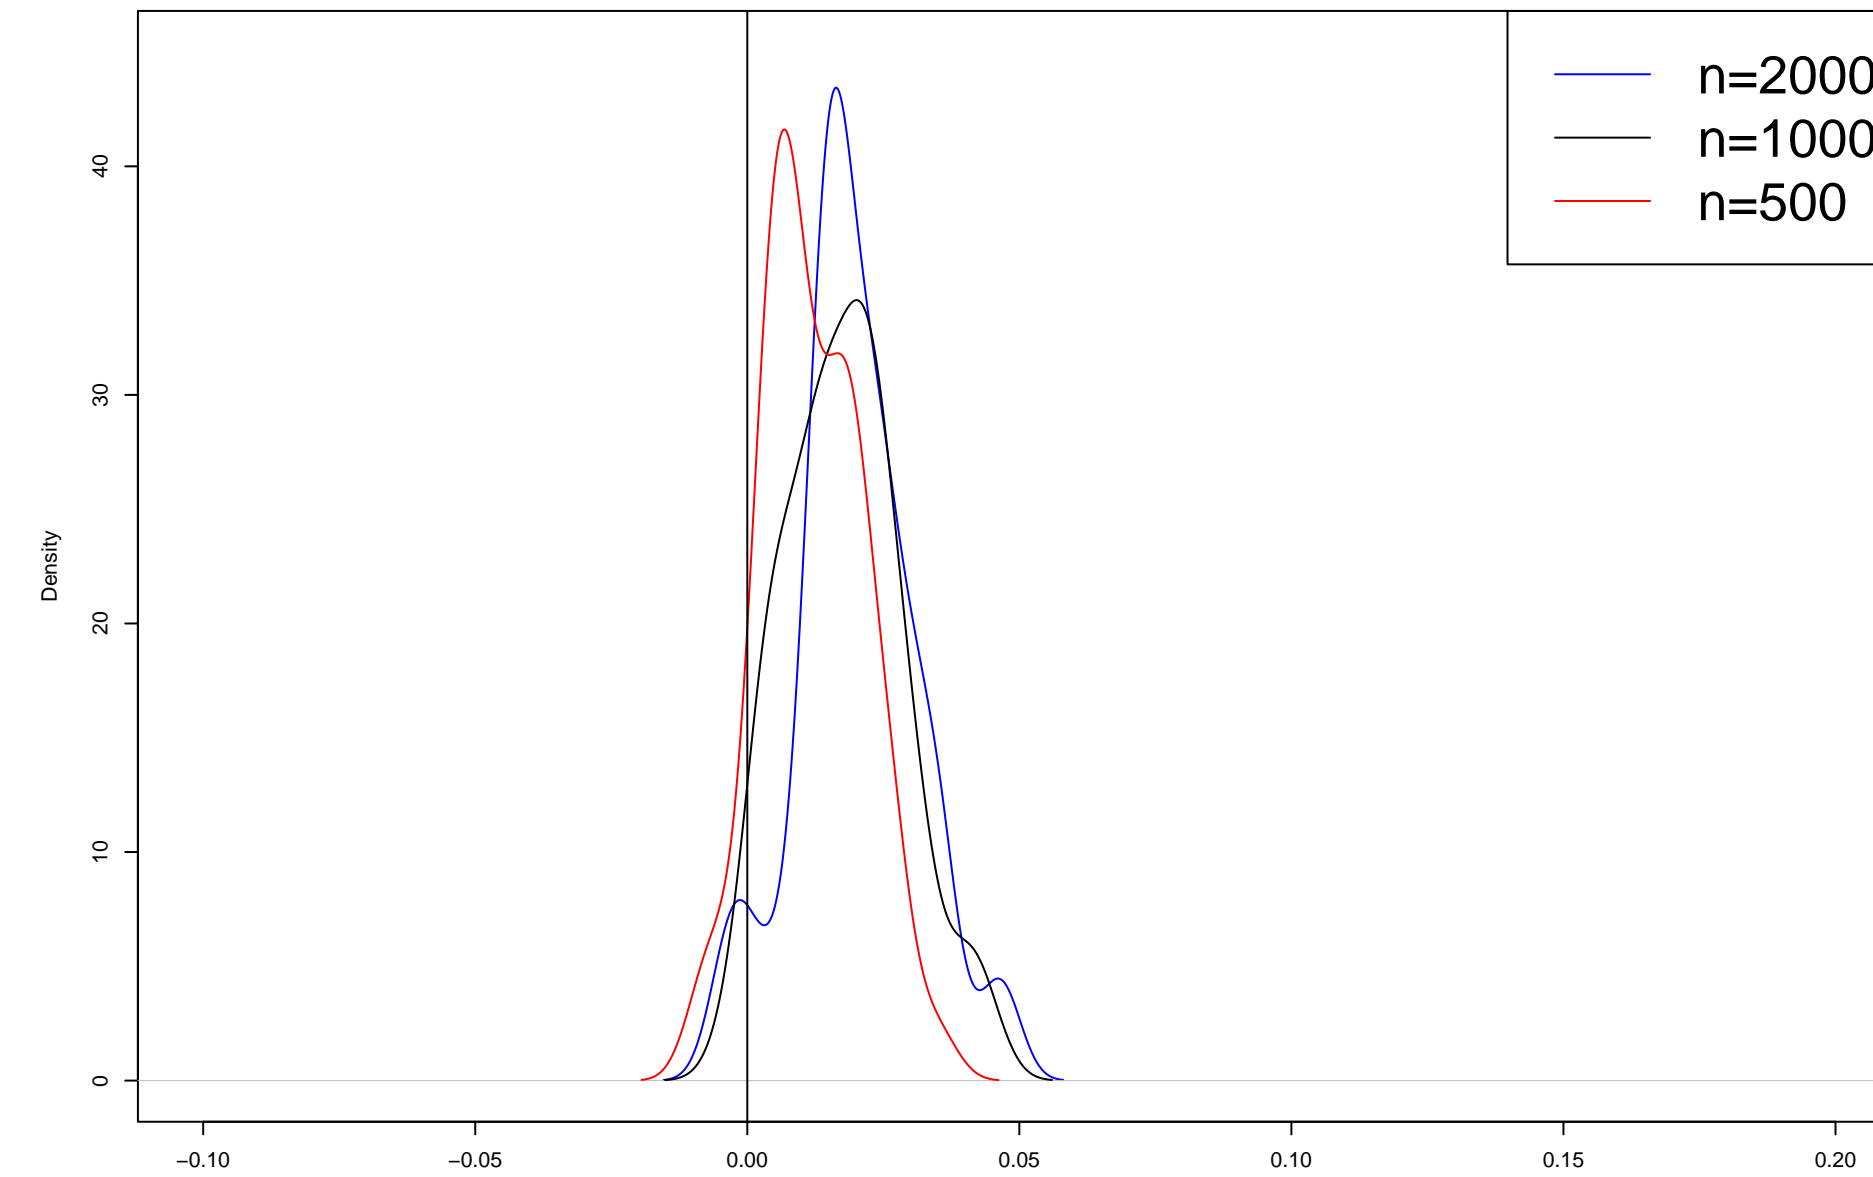

Supplement: supplementary_material [file densities_control.pdf › bridging/tables/densities_control.pdf]

**comparison of greedy success,  $T=0.1$**

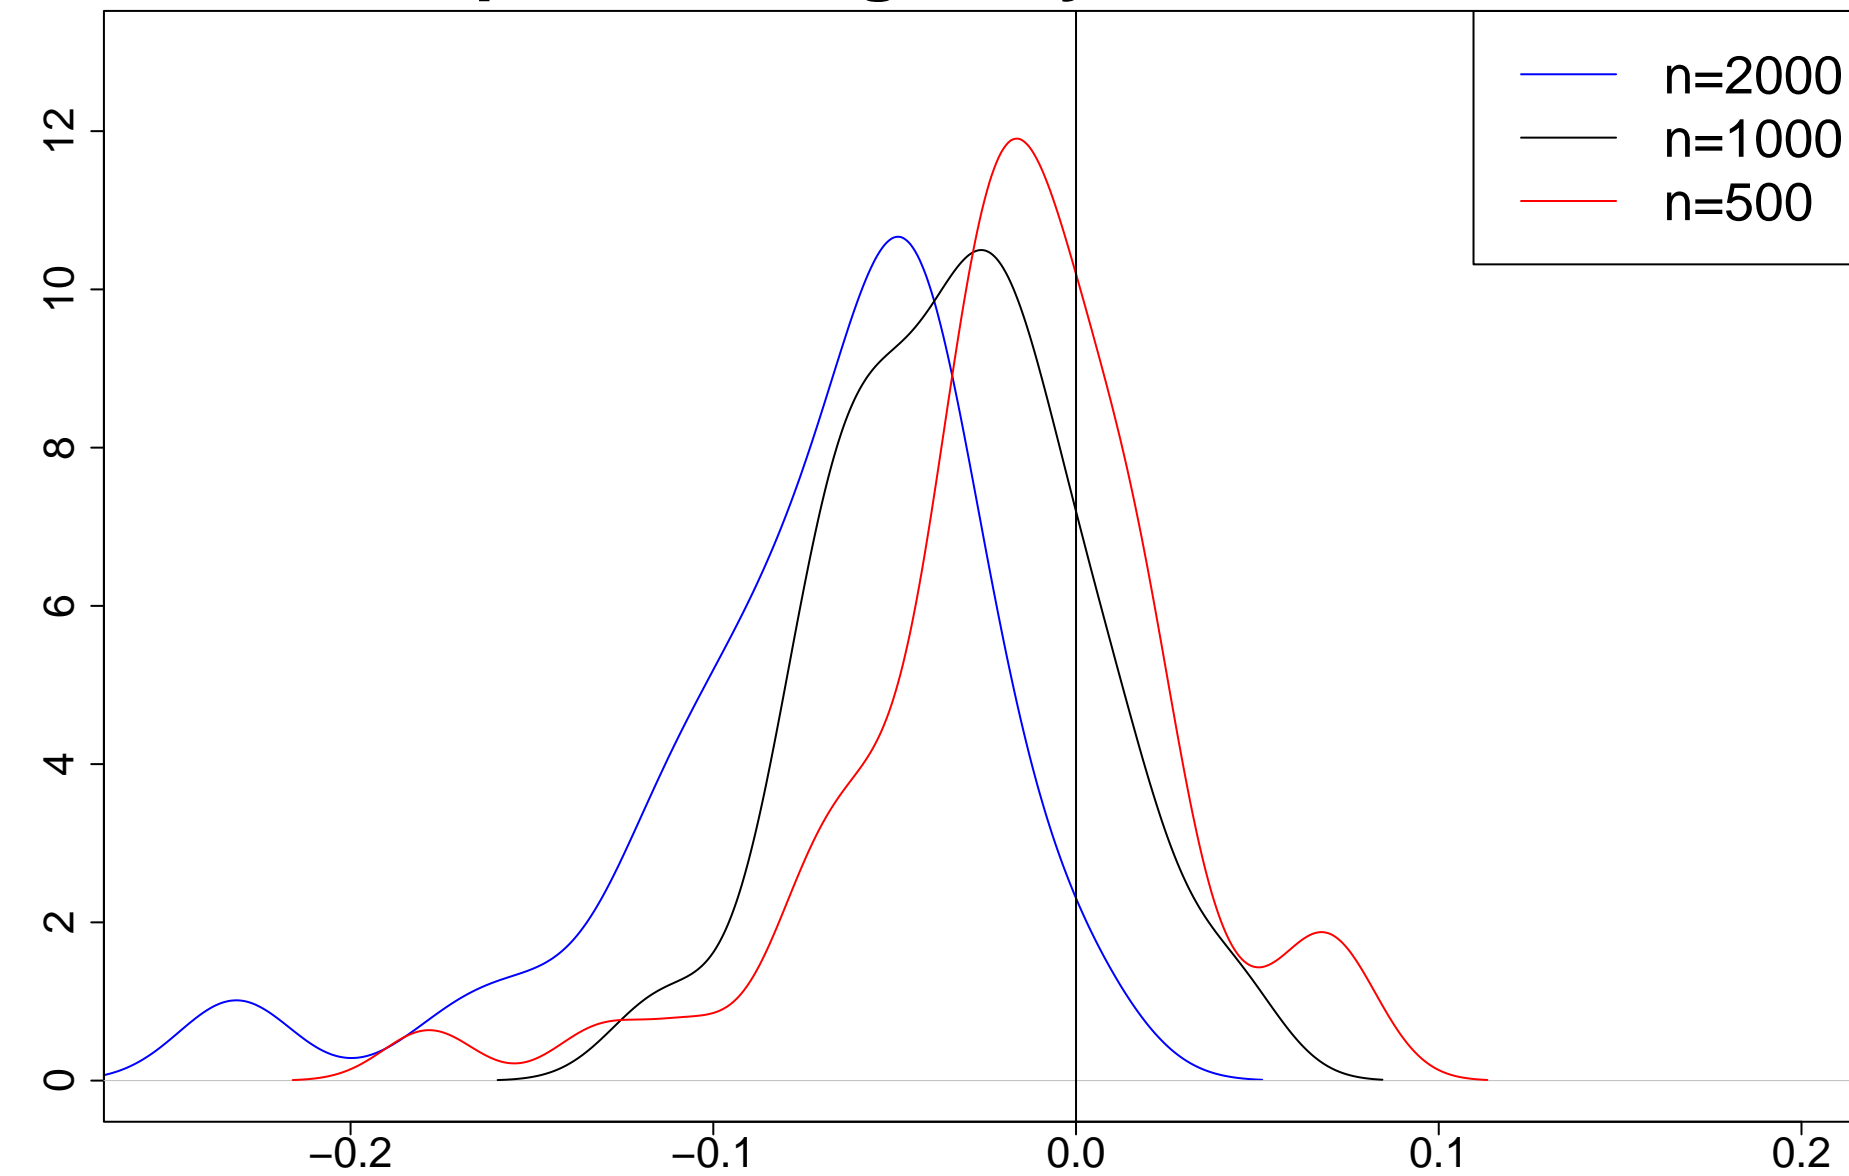

**comparison of greedy success,  $T=0.4$**

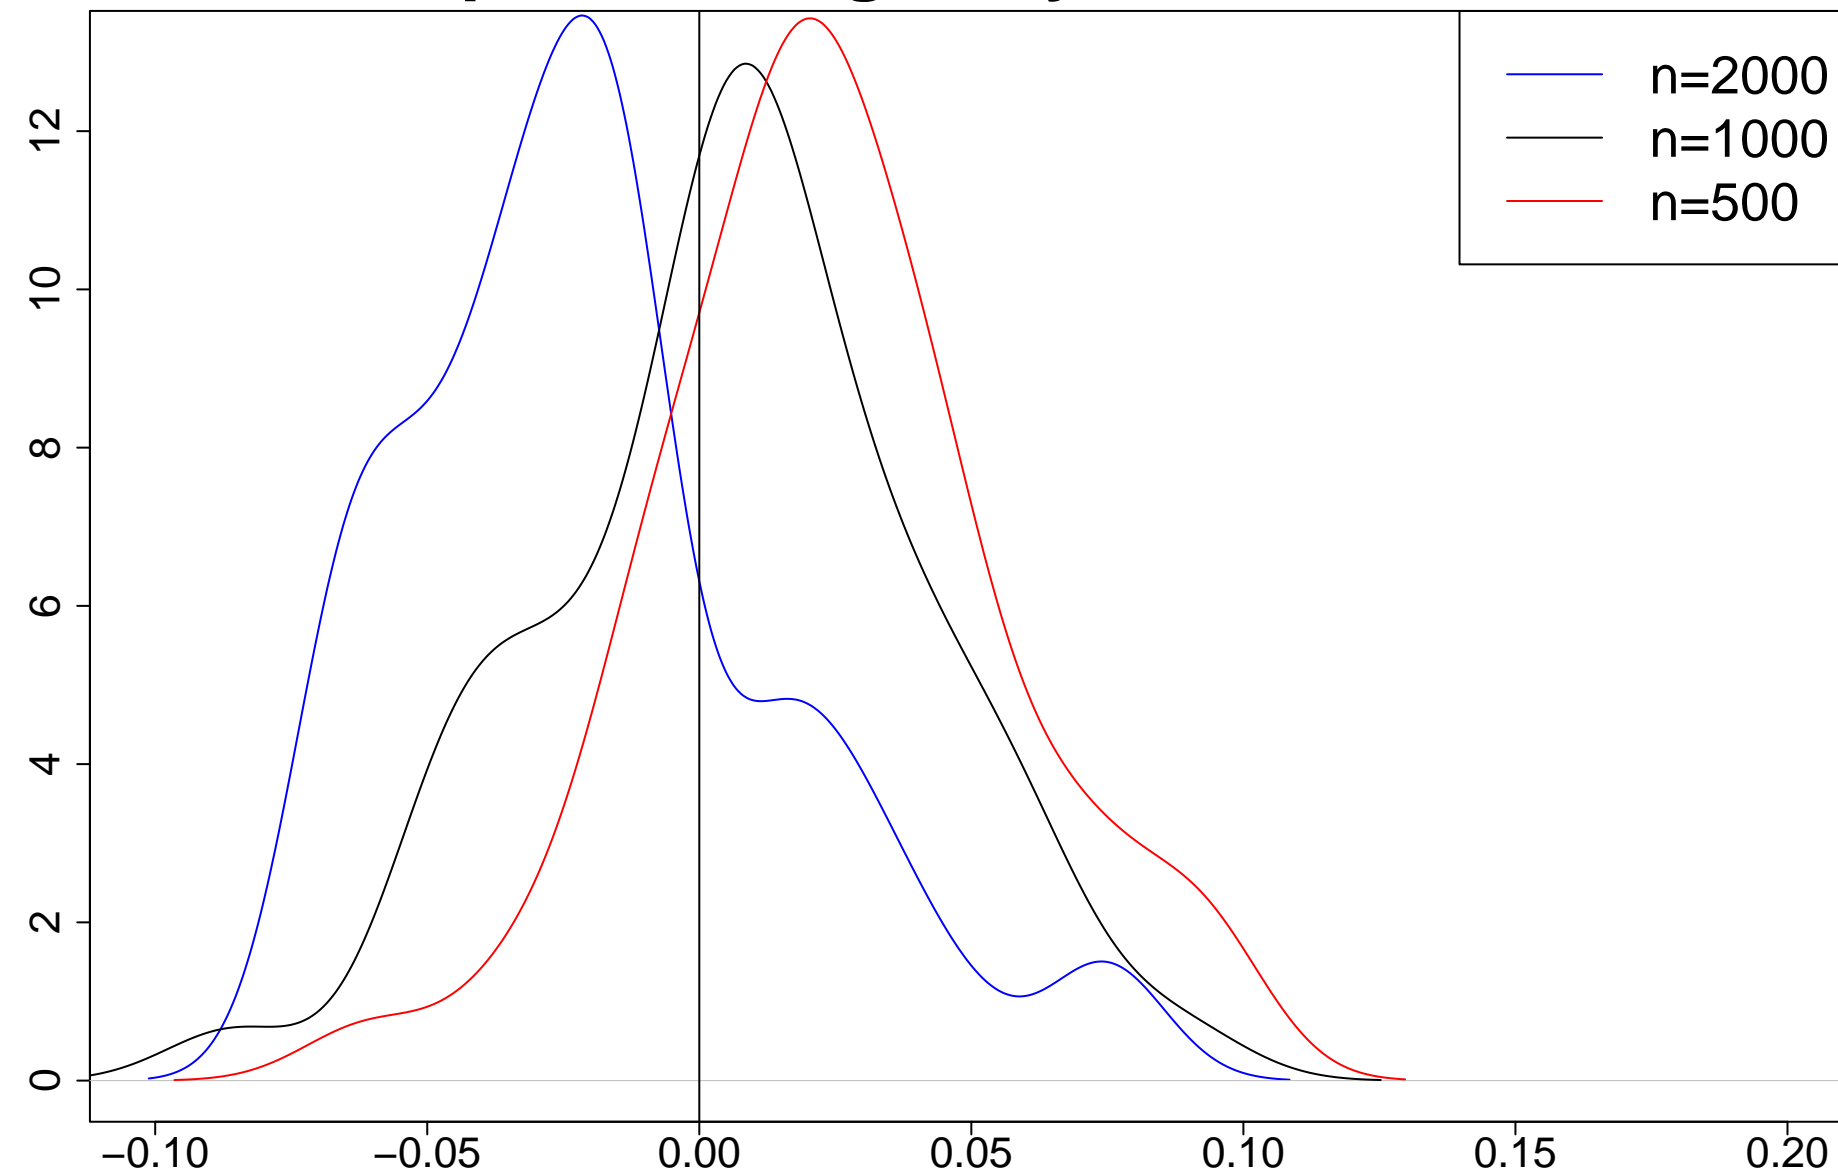

**comparison of greedy success,  $T=0.7$**

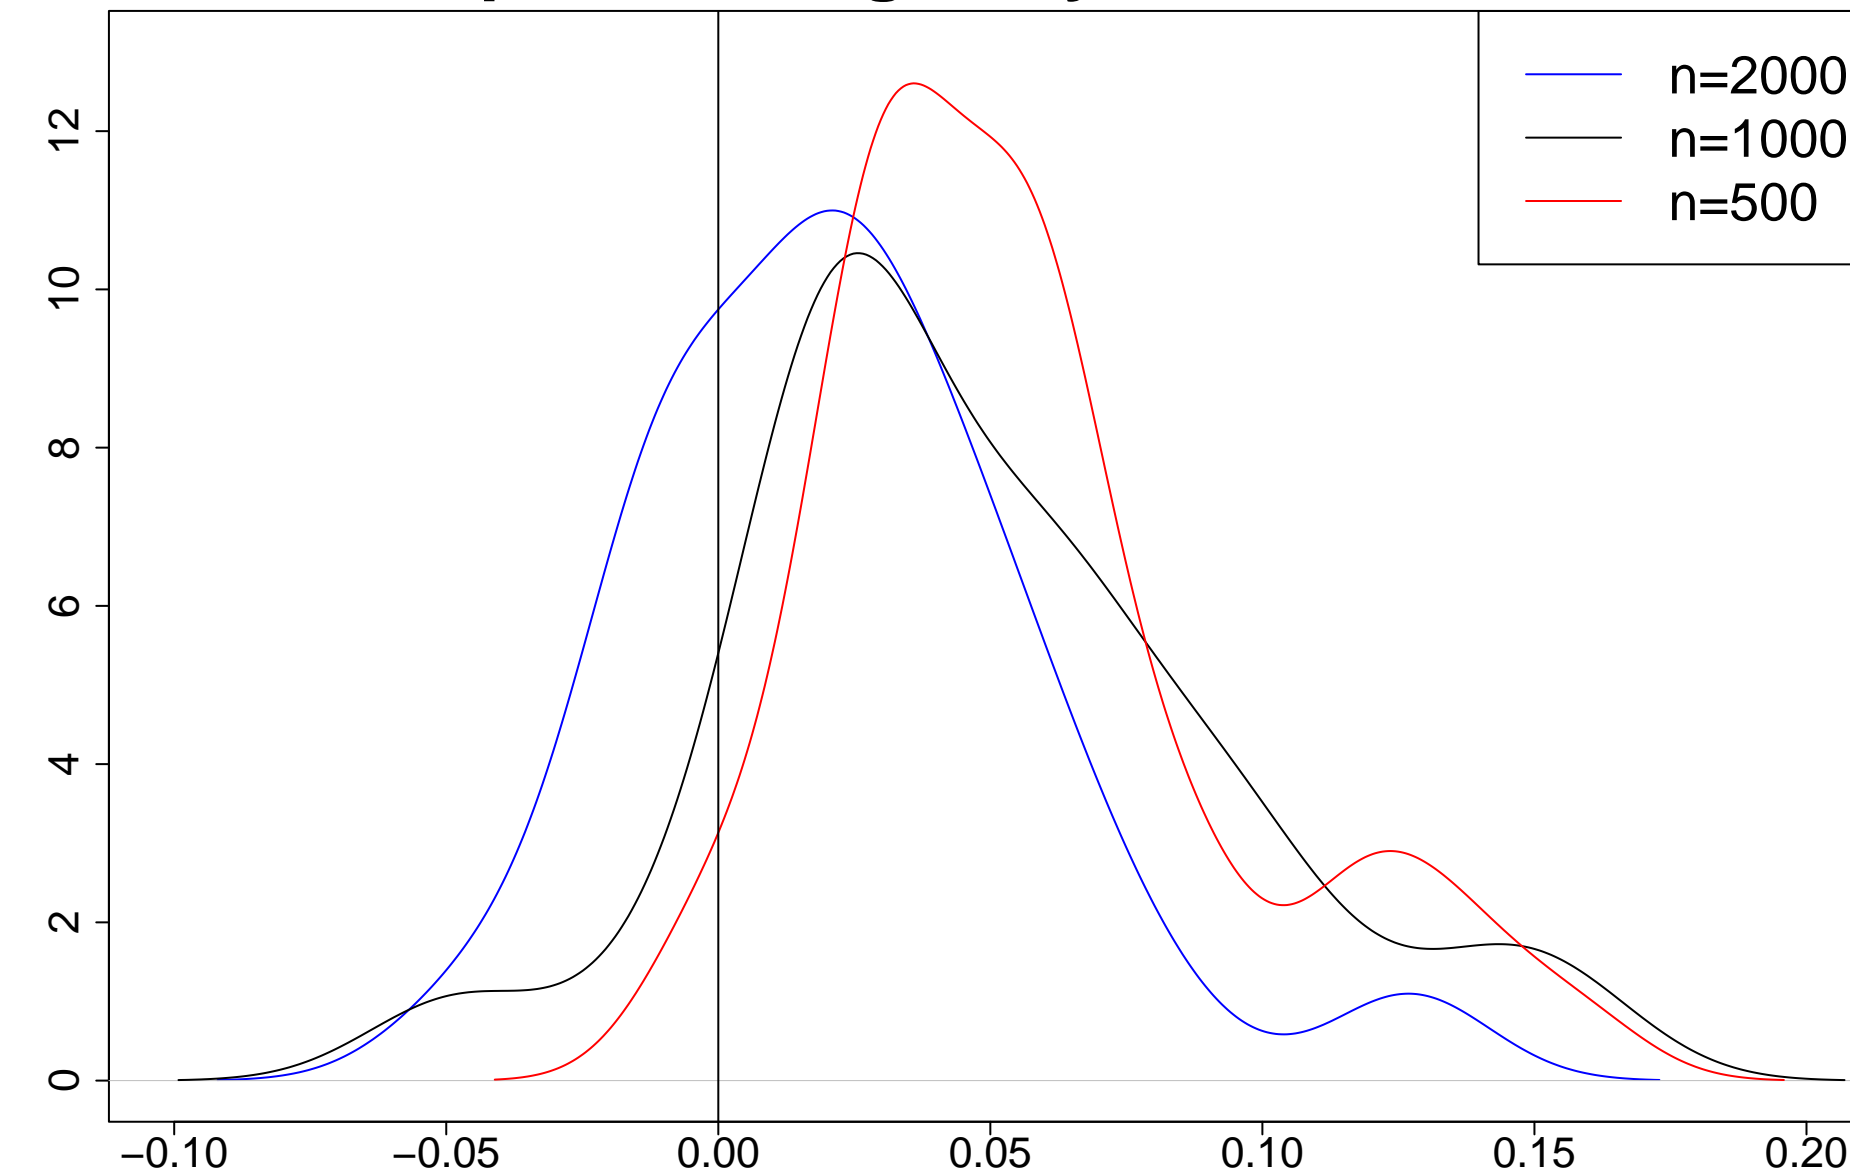

Supplement: supplementary_material [file densities_greedy.pdf › bridging/tables/densities_greedy.pdf]

$T=0.1$

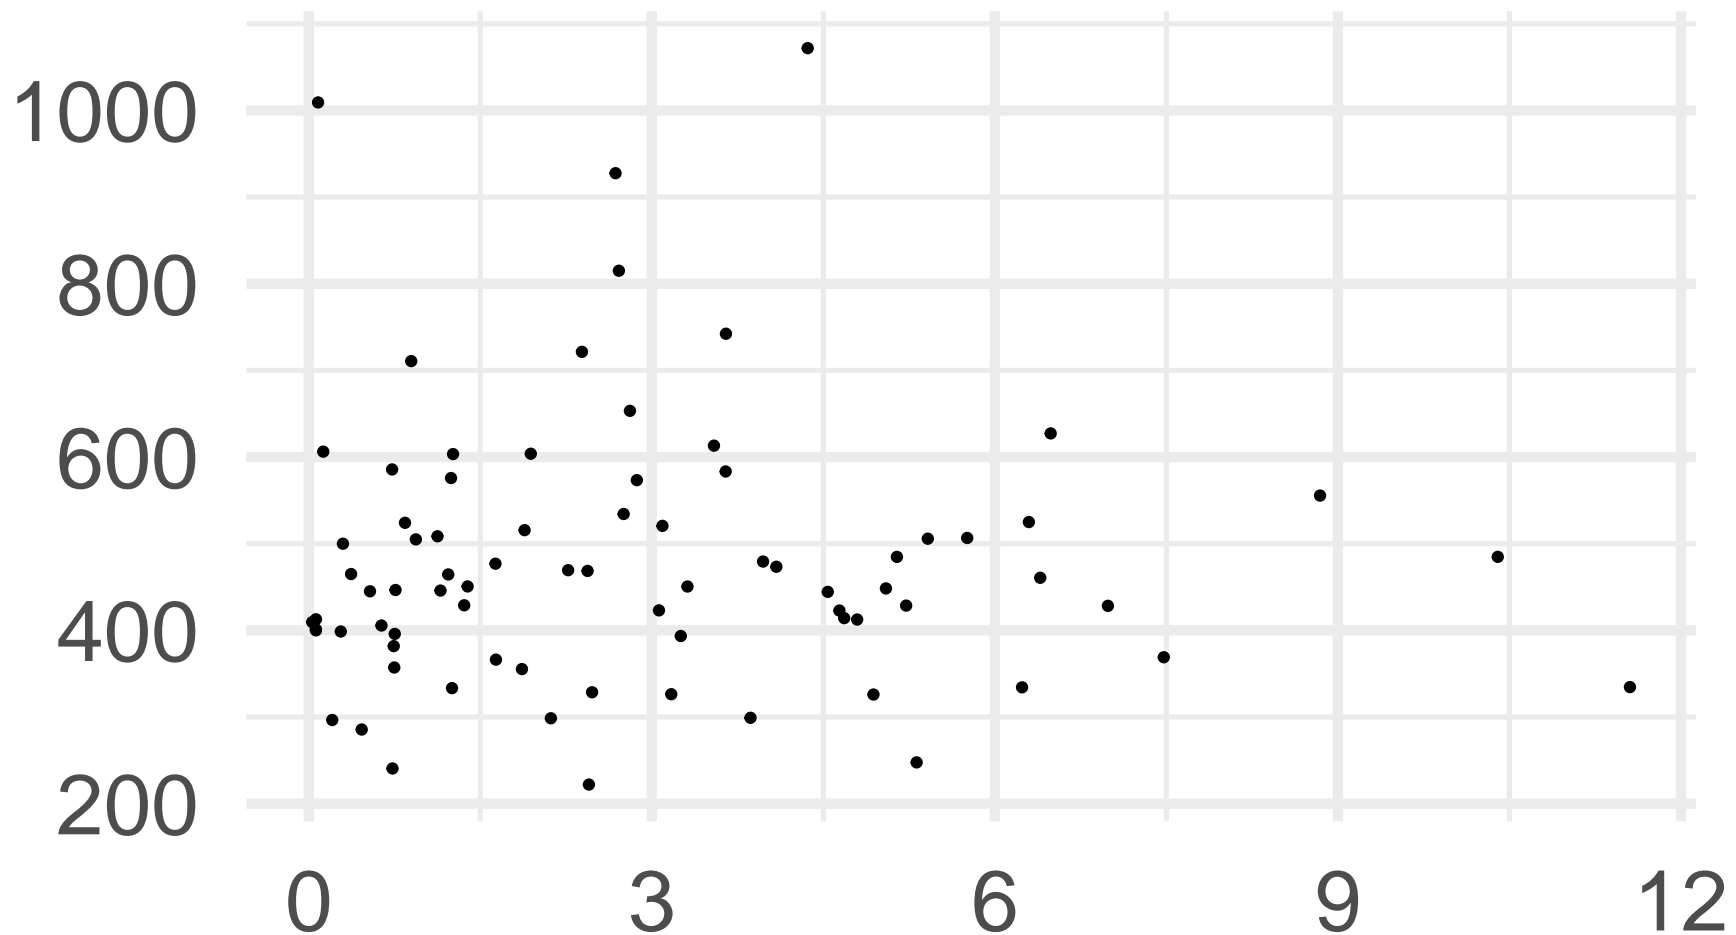

Supplement: supplementary_material [file gain_MAP01.pdf › bridging/tables/gain_MAP01.pdf]

$T=0.4$

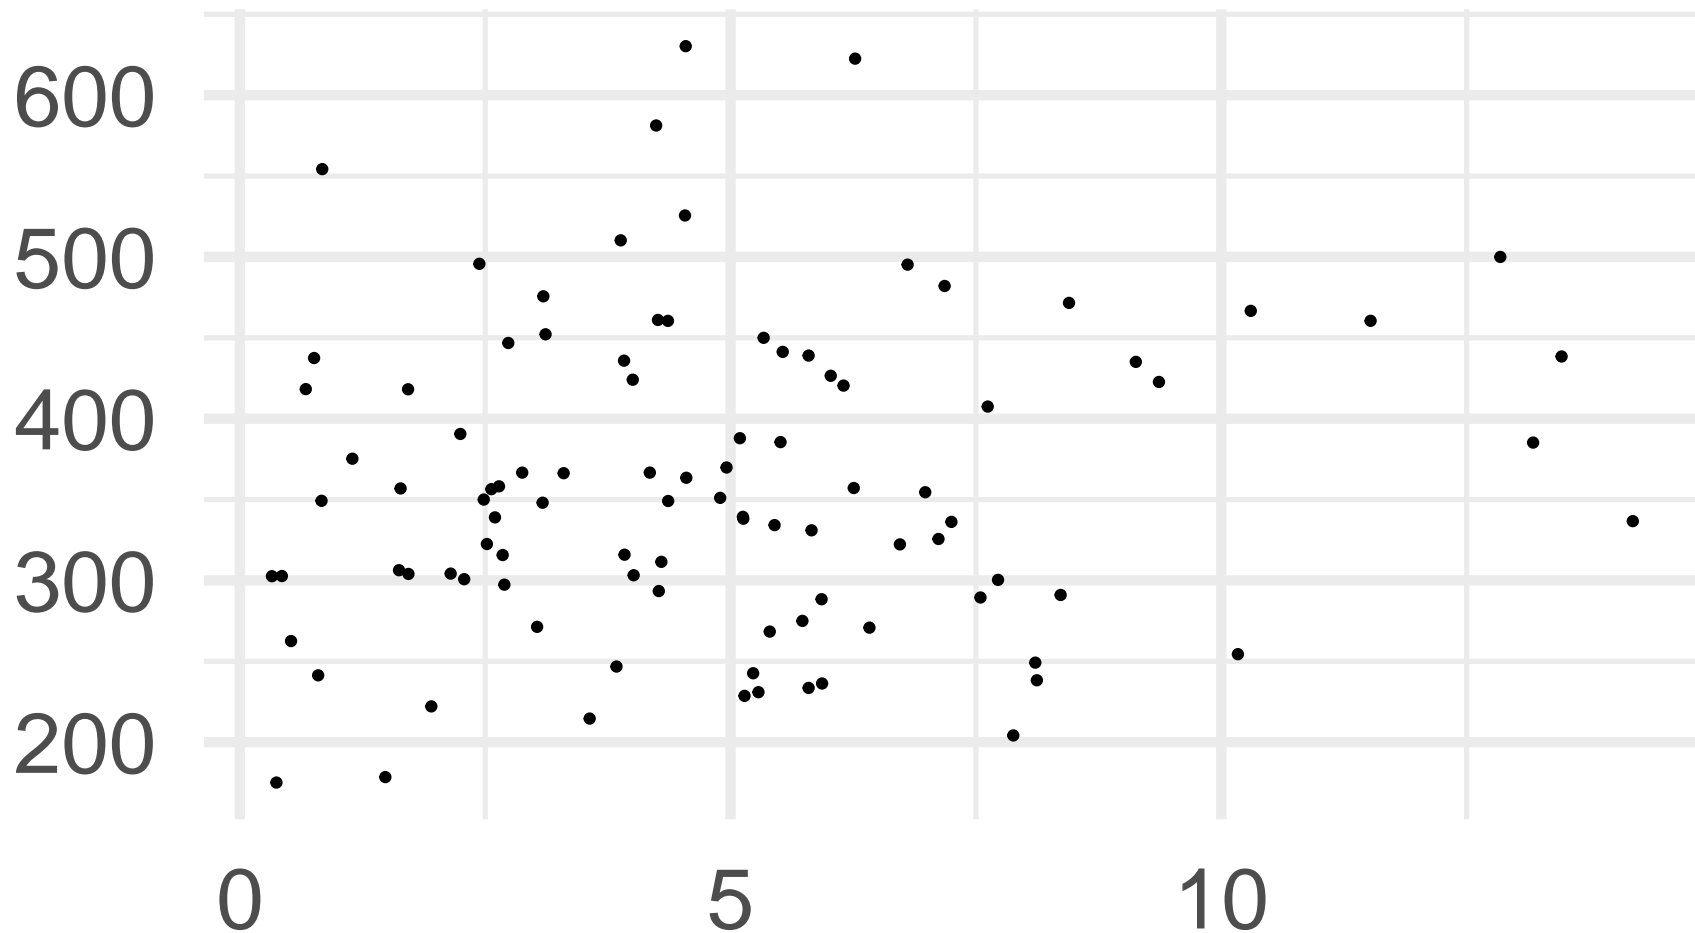

Supplement: supplementary_material [file gain_MAP04.pdf › bridging/tables/gain_MAP04.pdf]

$T=0.7$

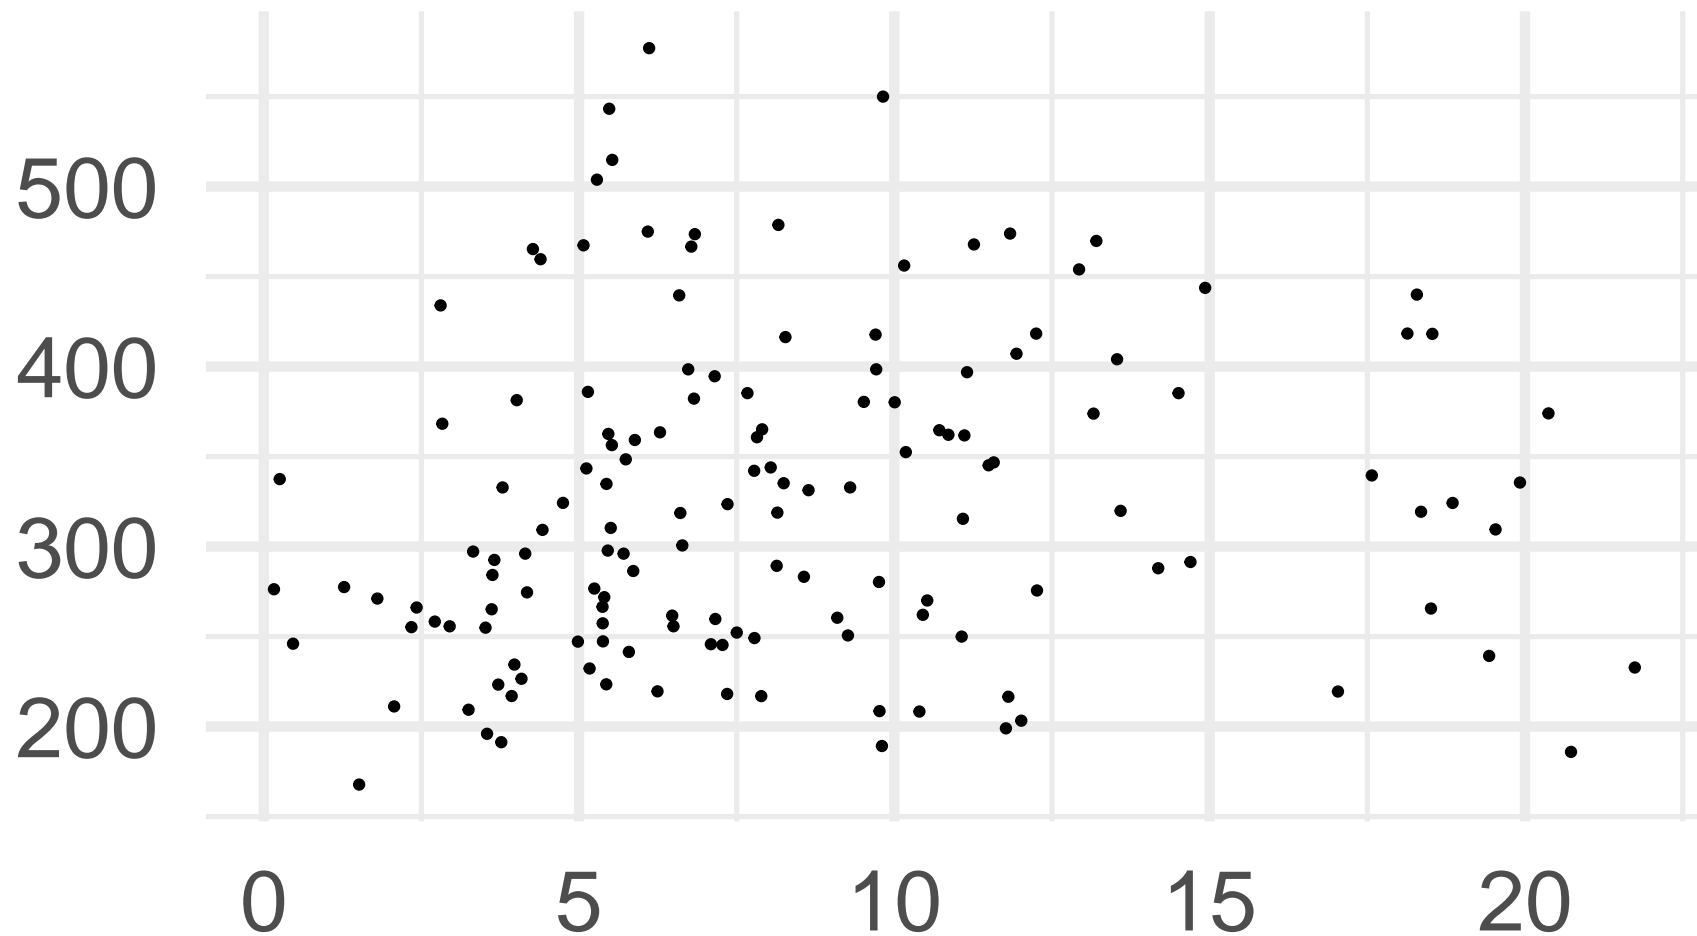

Supplement: supplementary_material [file gain_MAP07.pdf › bridging/tables/gain_MAP07.pdf]

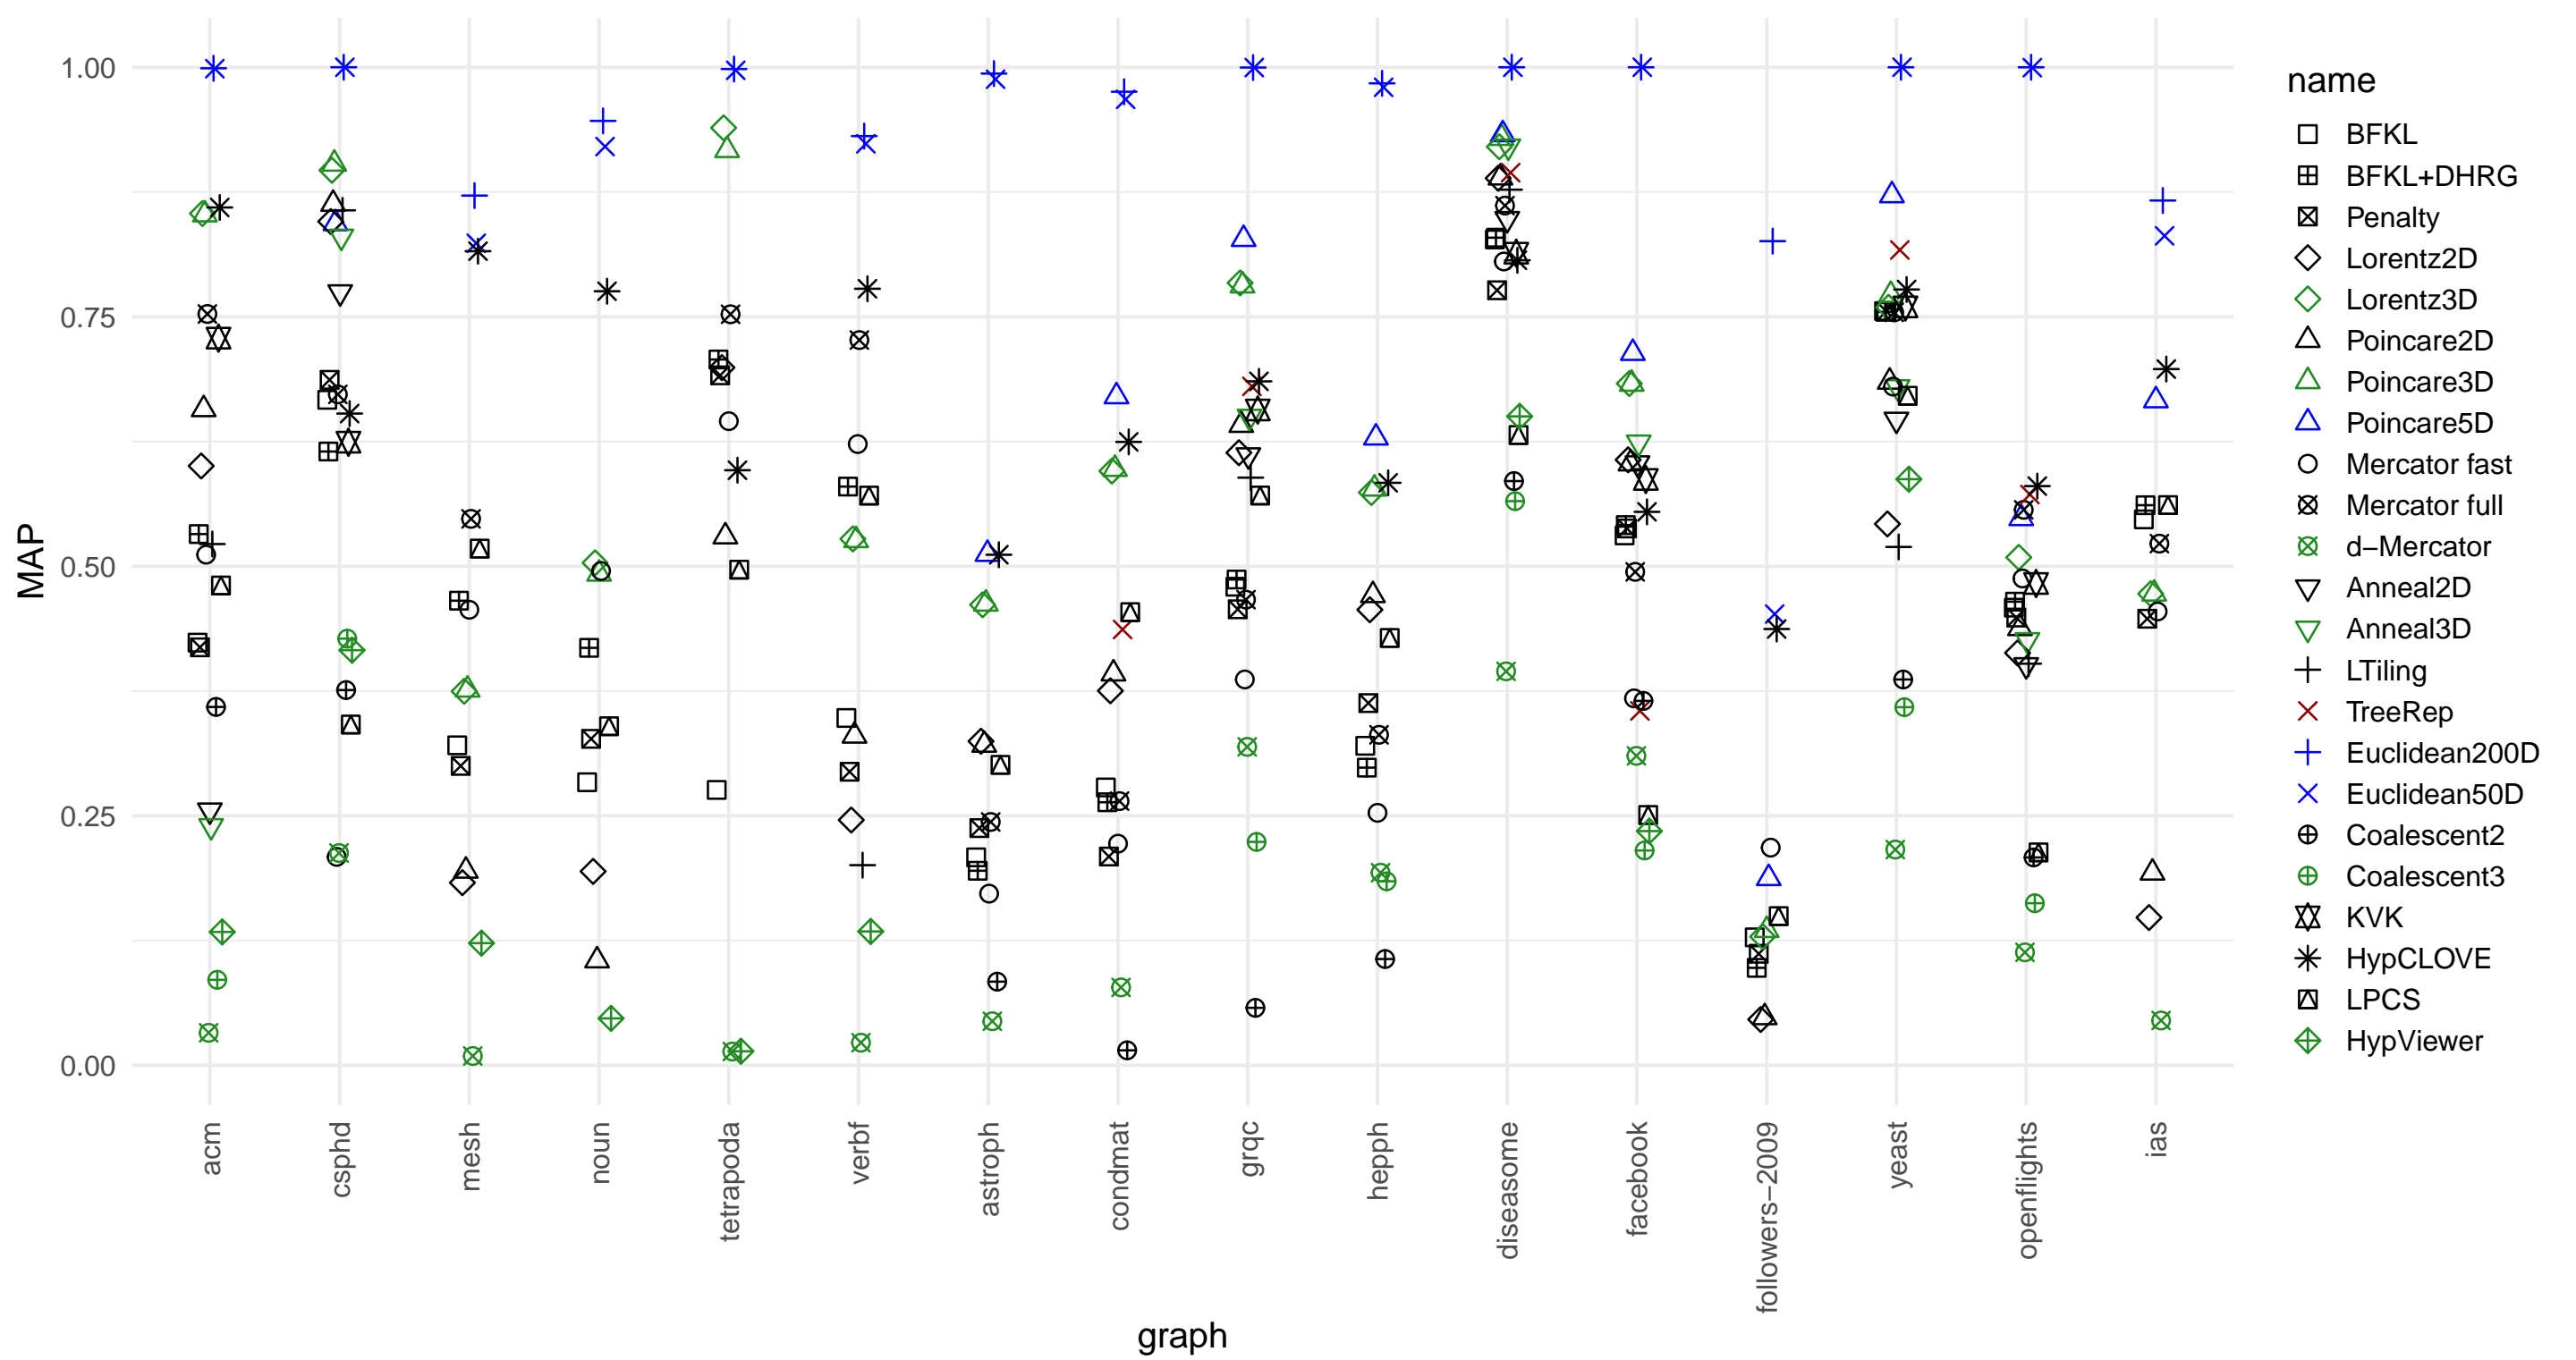

Supplement: supplementary_material [file real-world_MAP.pdf › bridging/tables/real-world_MAP.pdf]

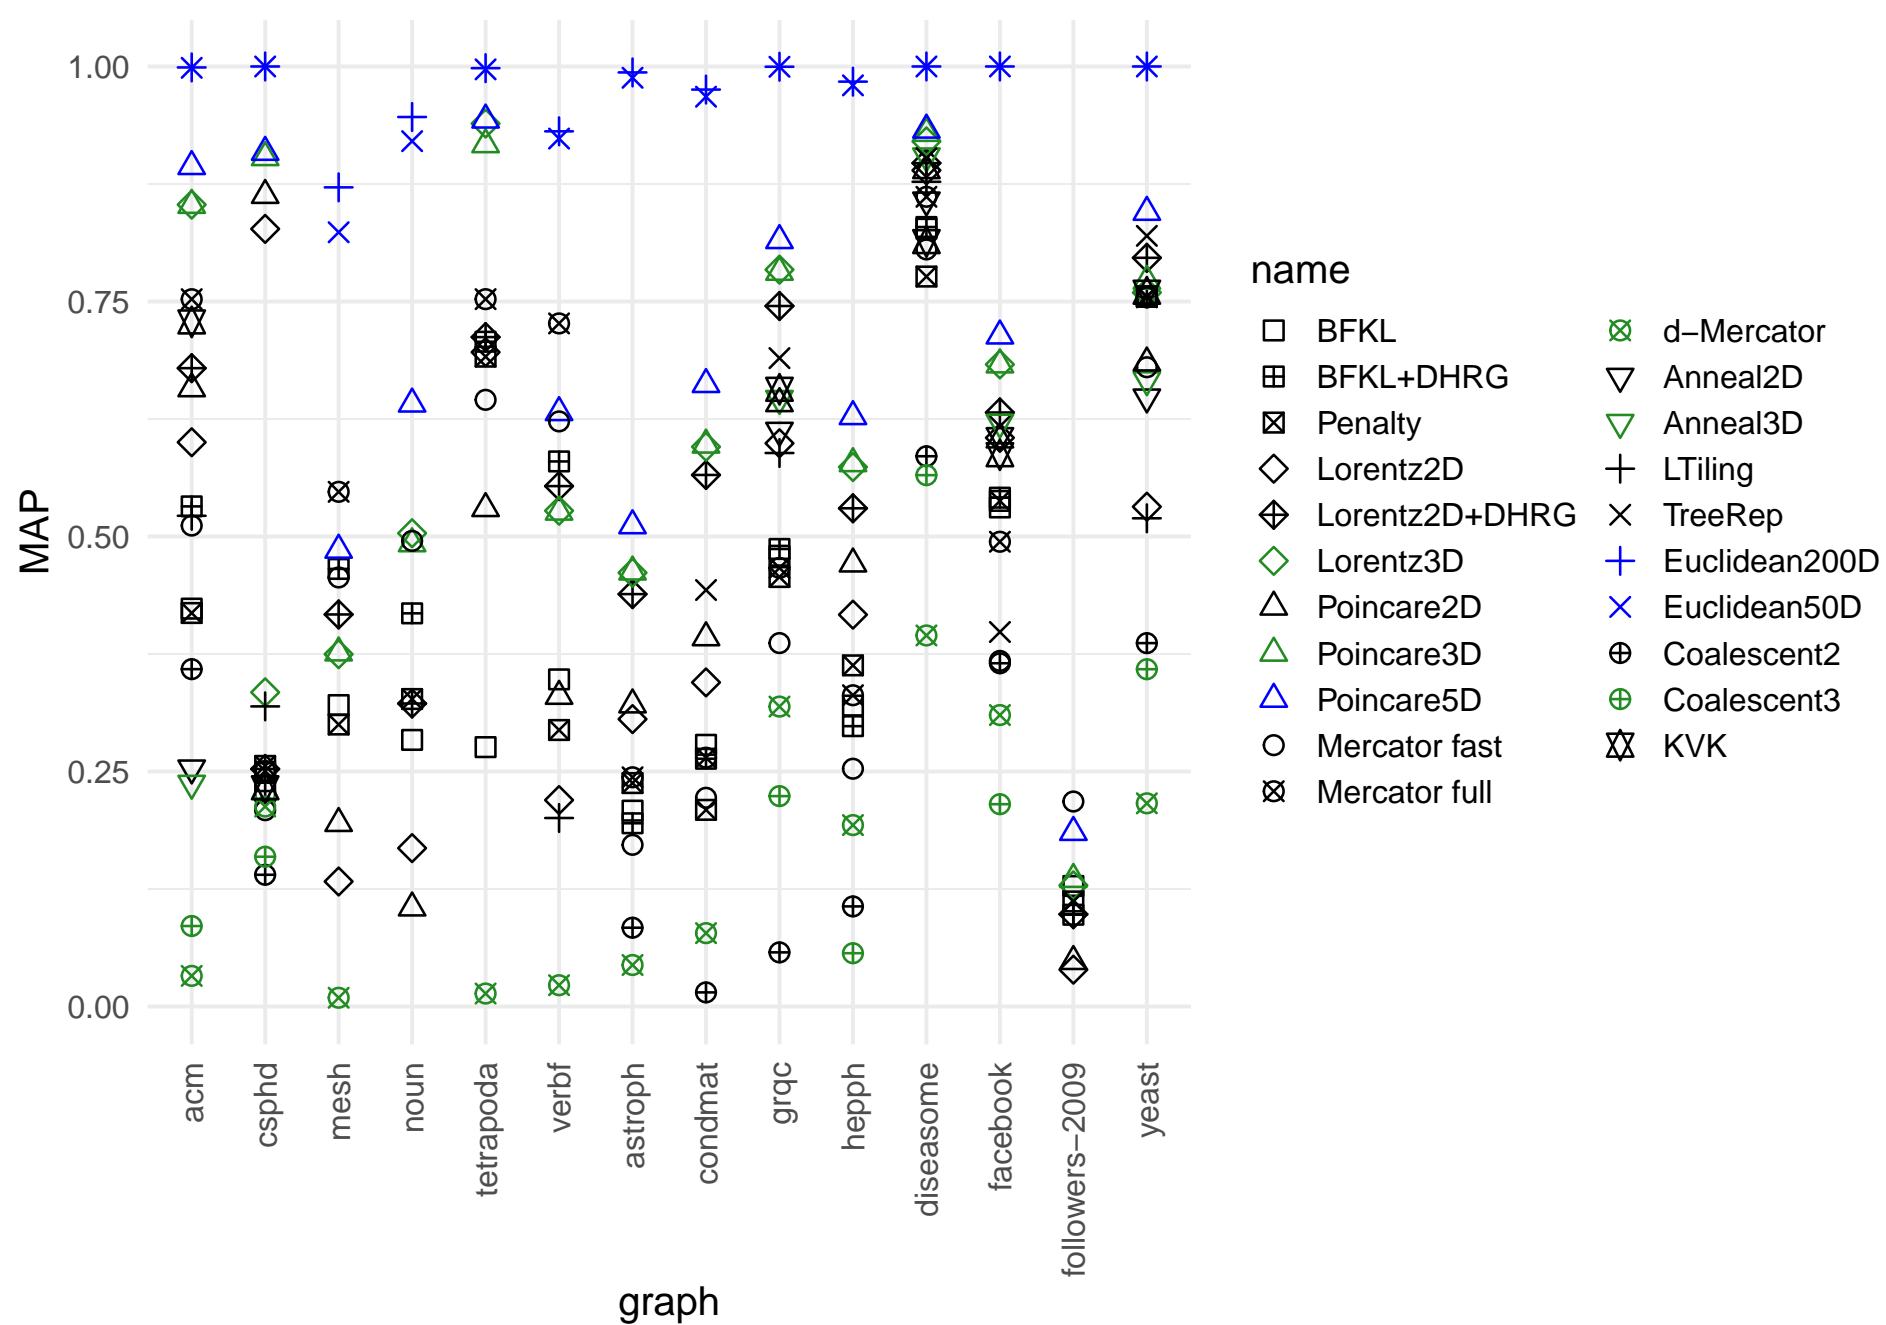

Supplement: supplementary_material [file real-world_MAP.pdf › bridging/tables/real-world_MAP.pdf]

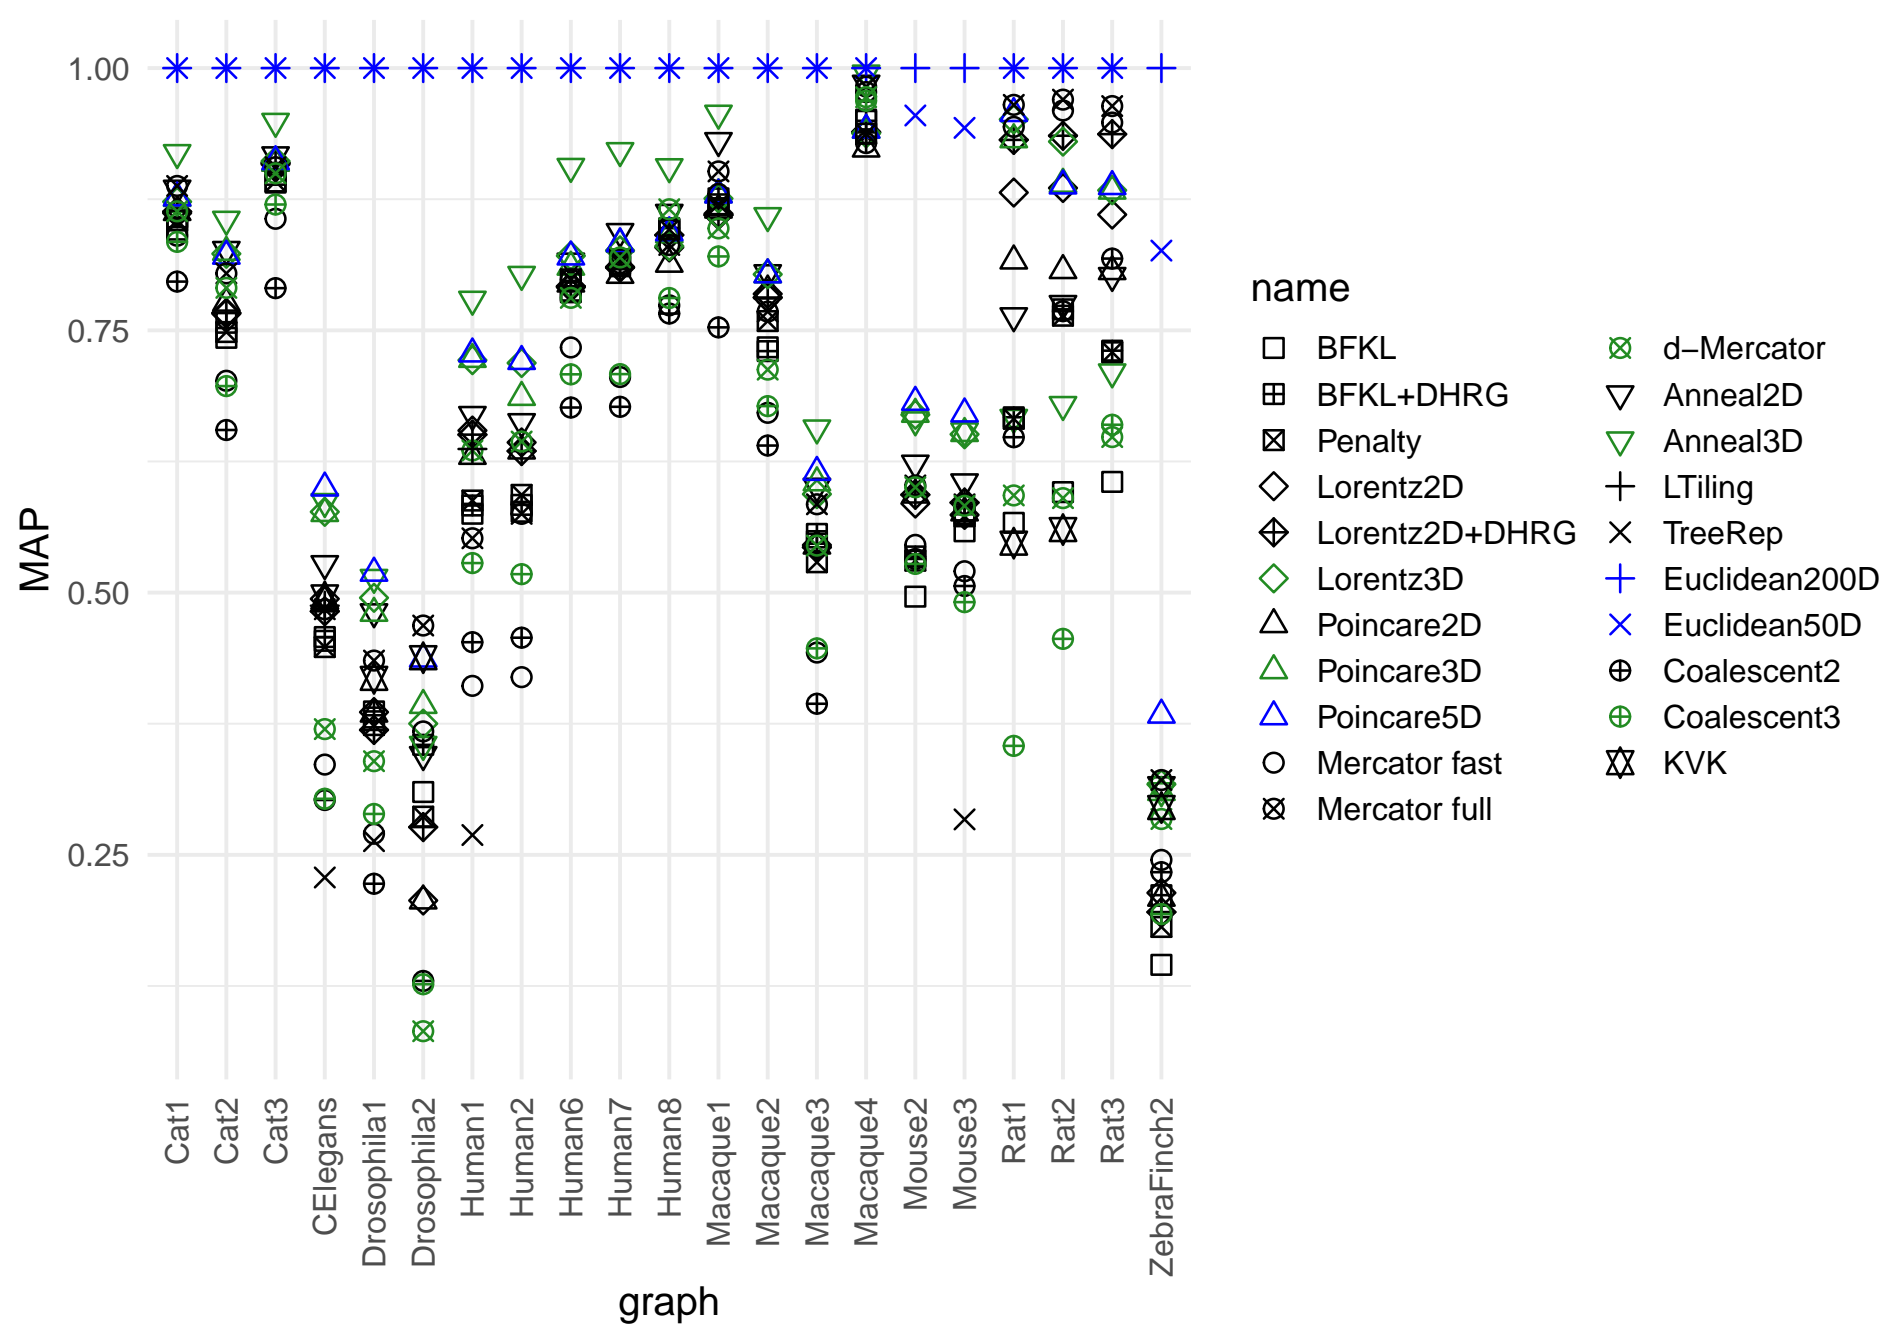

Supplement: supplementary_material [file real-world_MAP_conn.pdf › bridging/tables/real-world_MAP_conn.pdf]

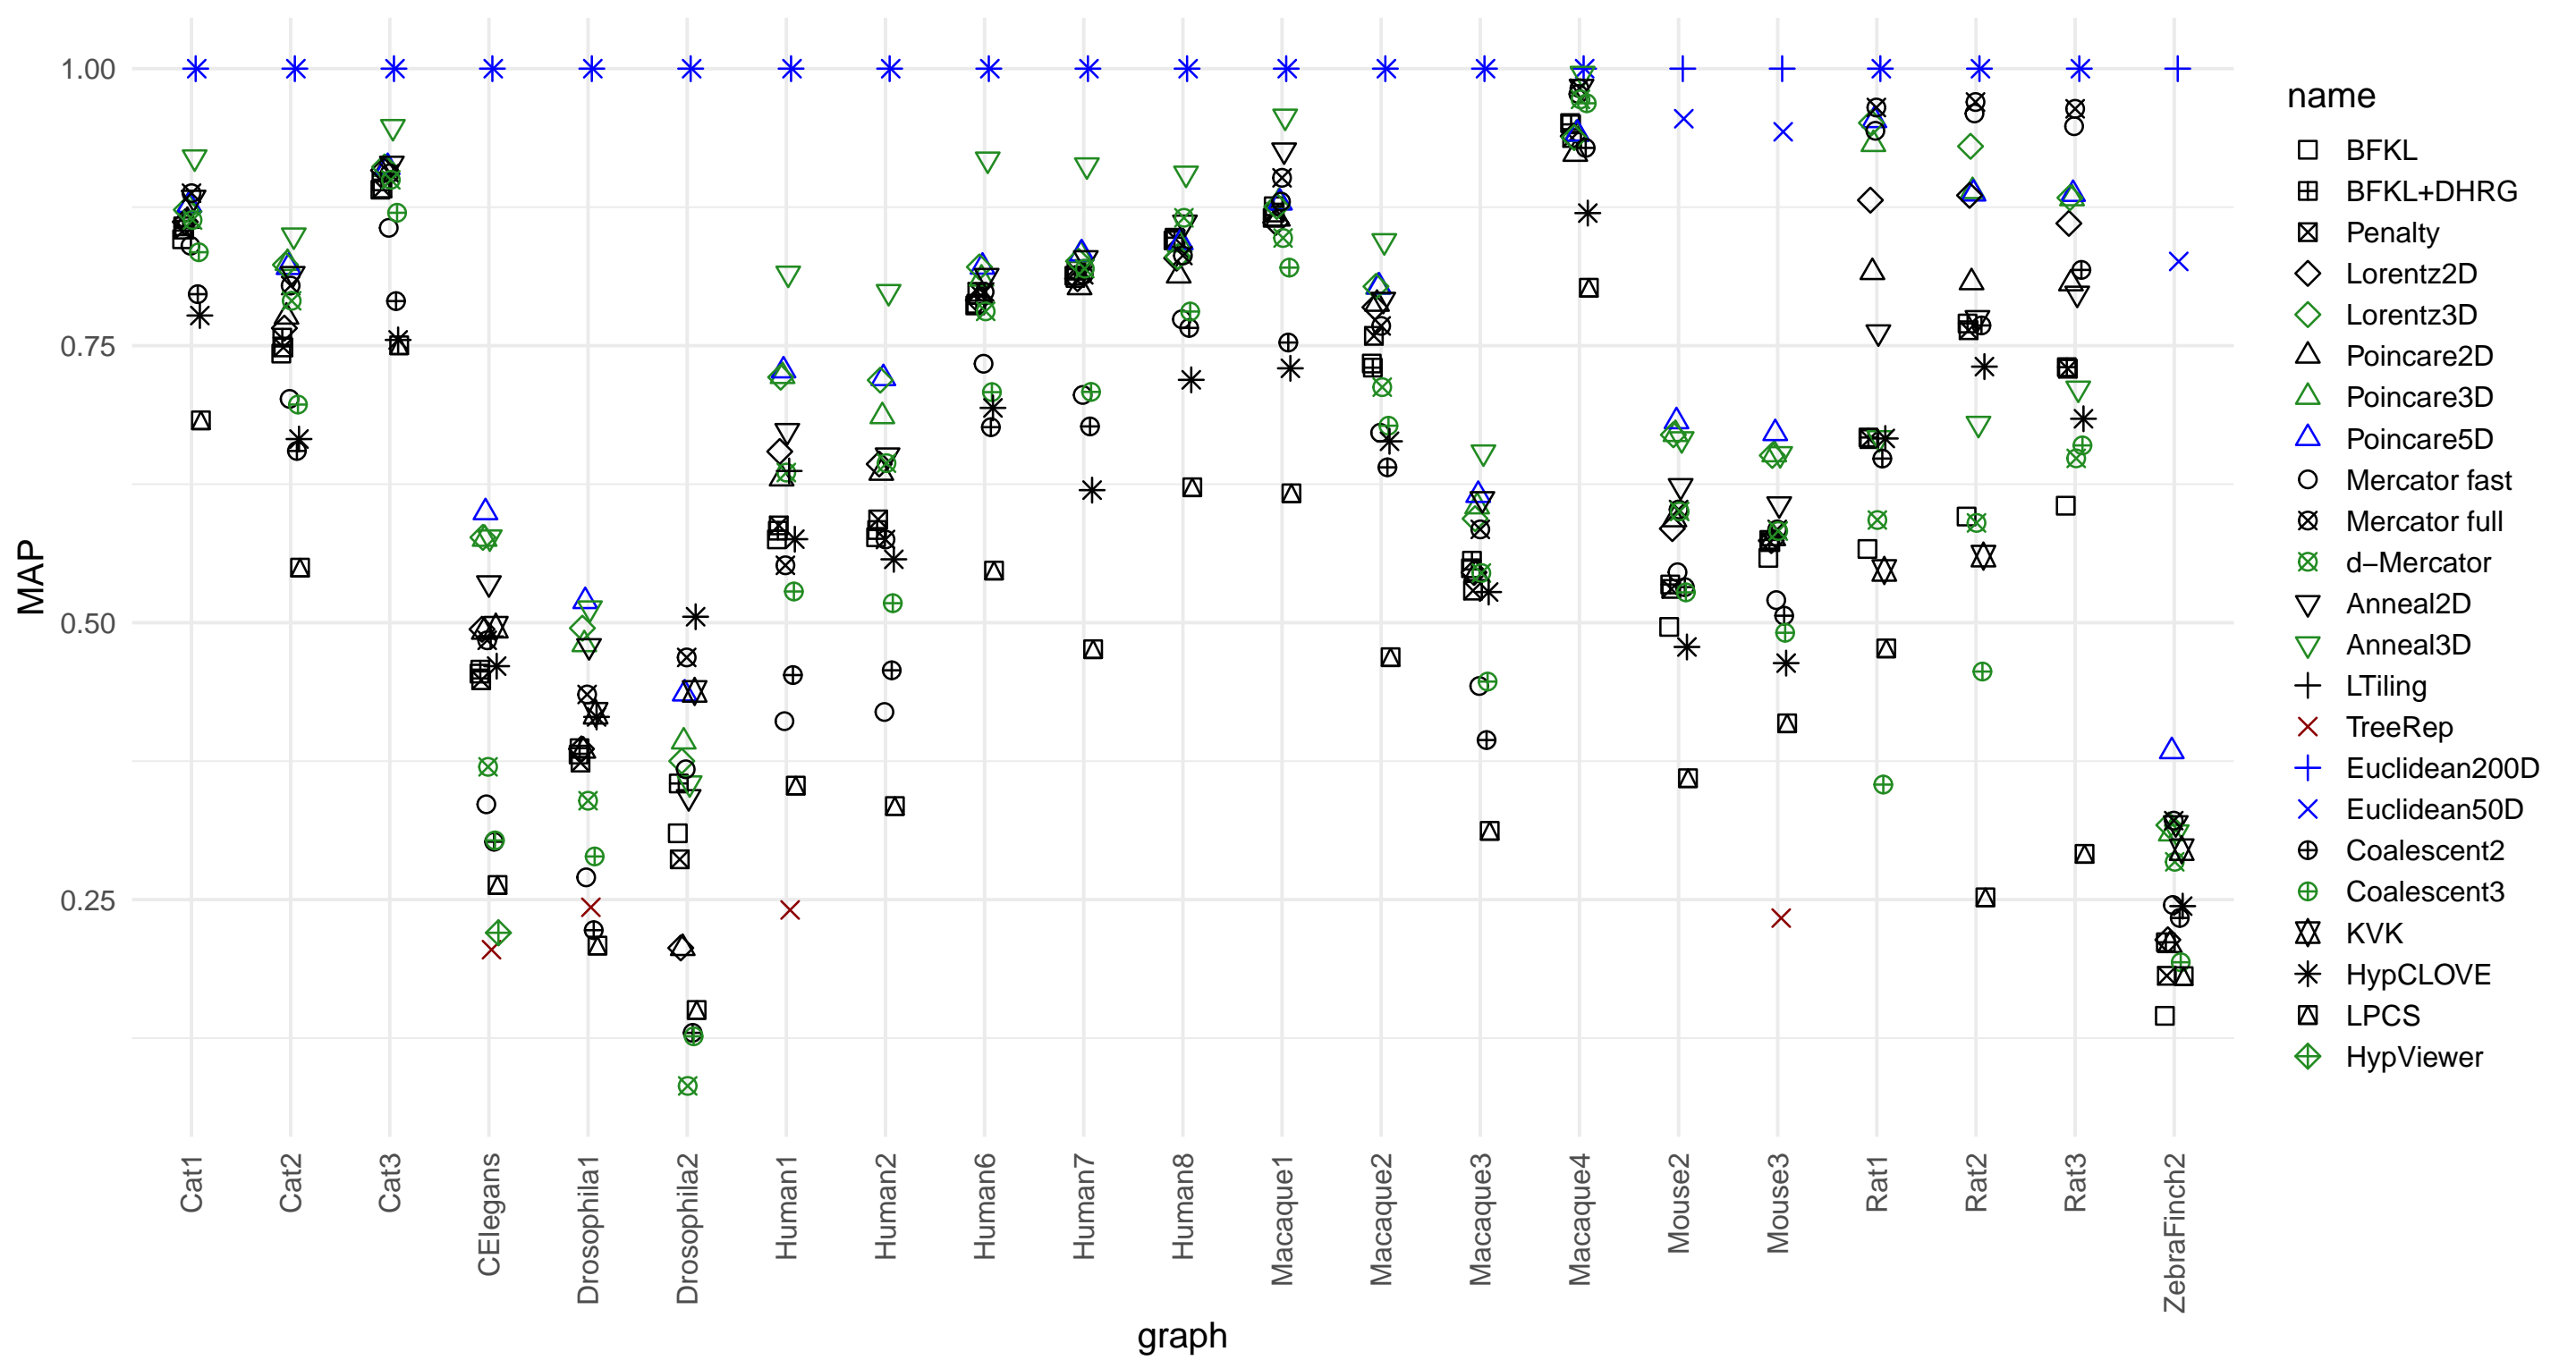

Supplement: supplementary_material [file real-world_MAP_conn.pdf › bridging/tables/real-world_MAP_conn.pdf]

ranks of MAP

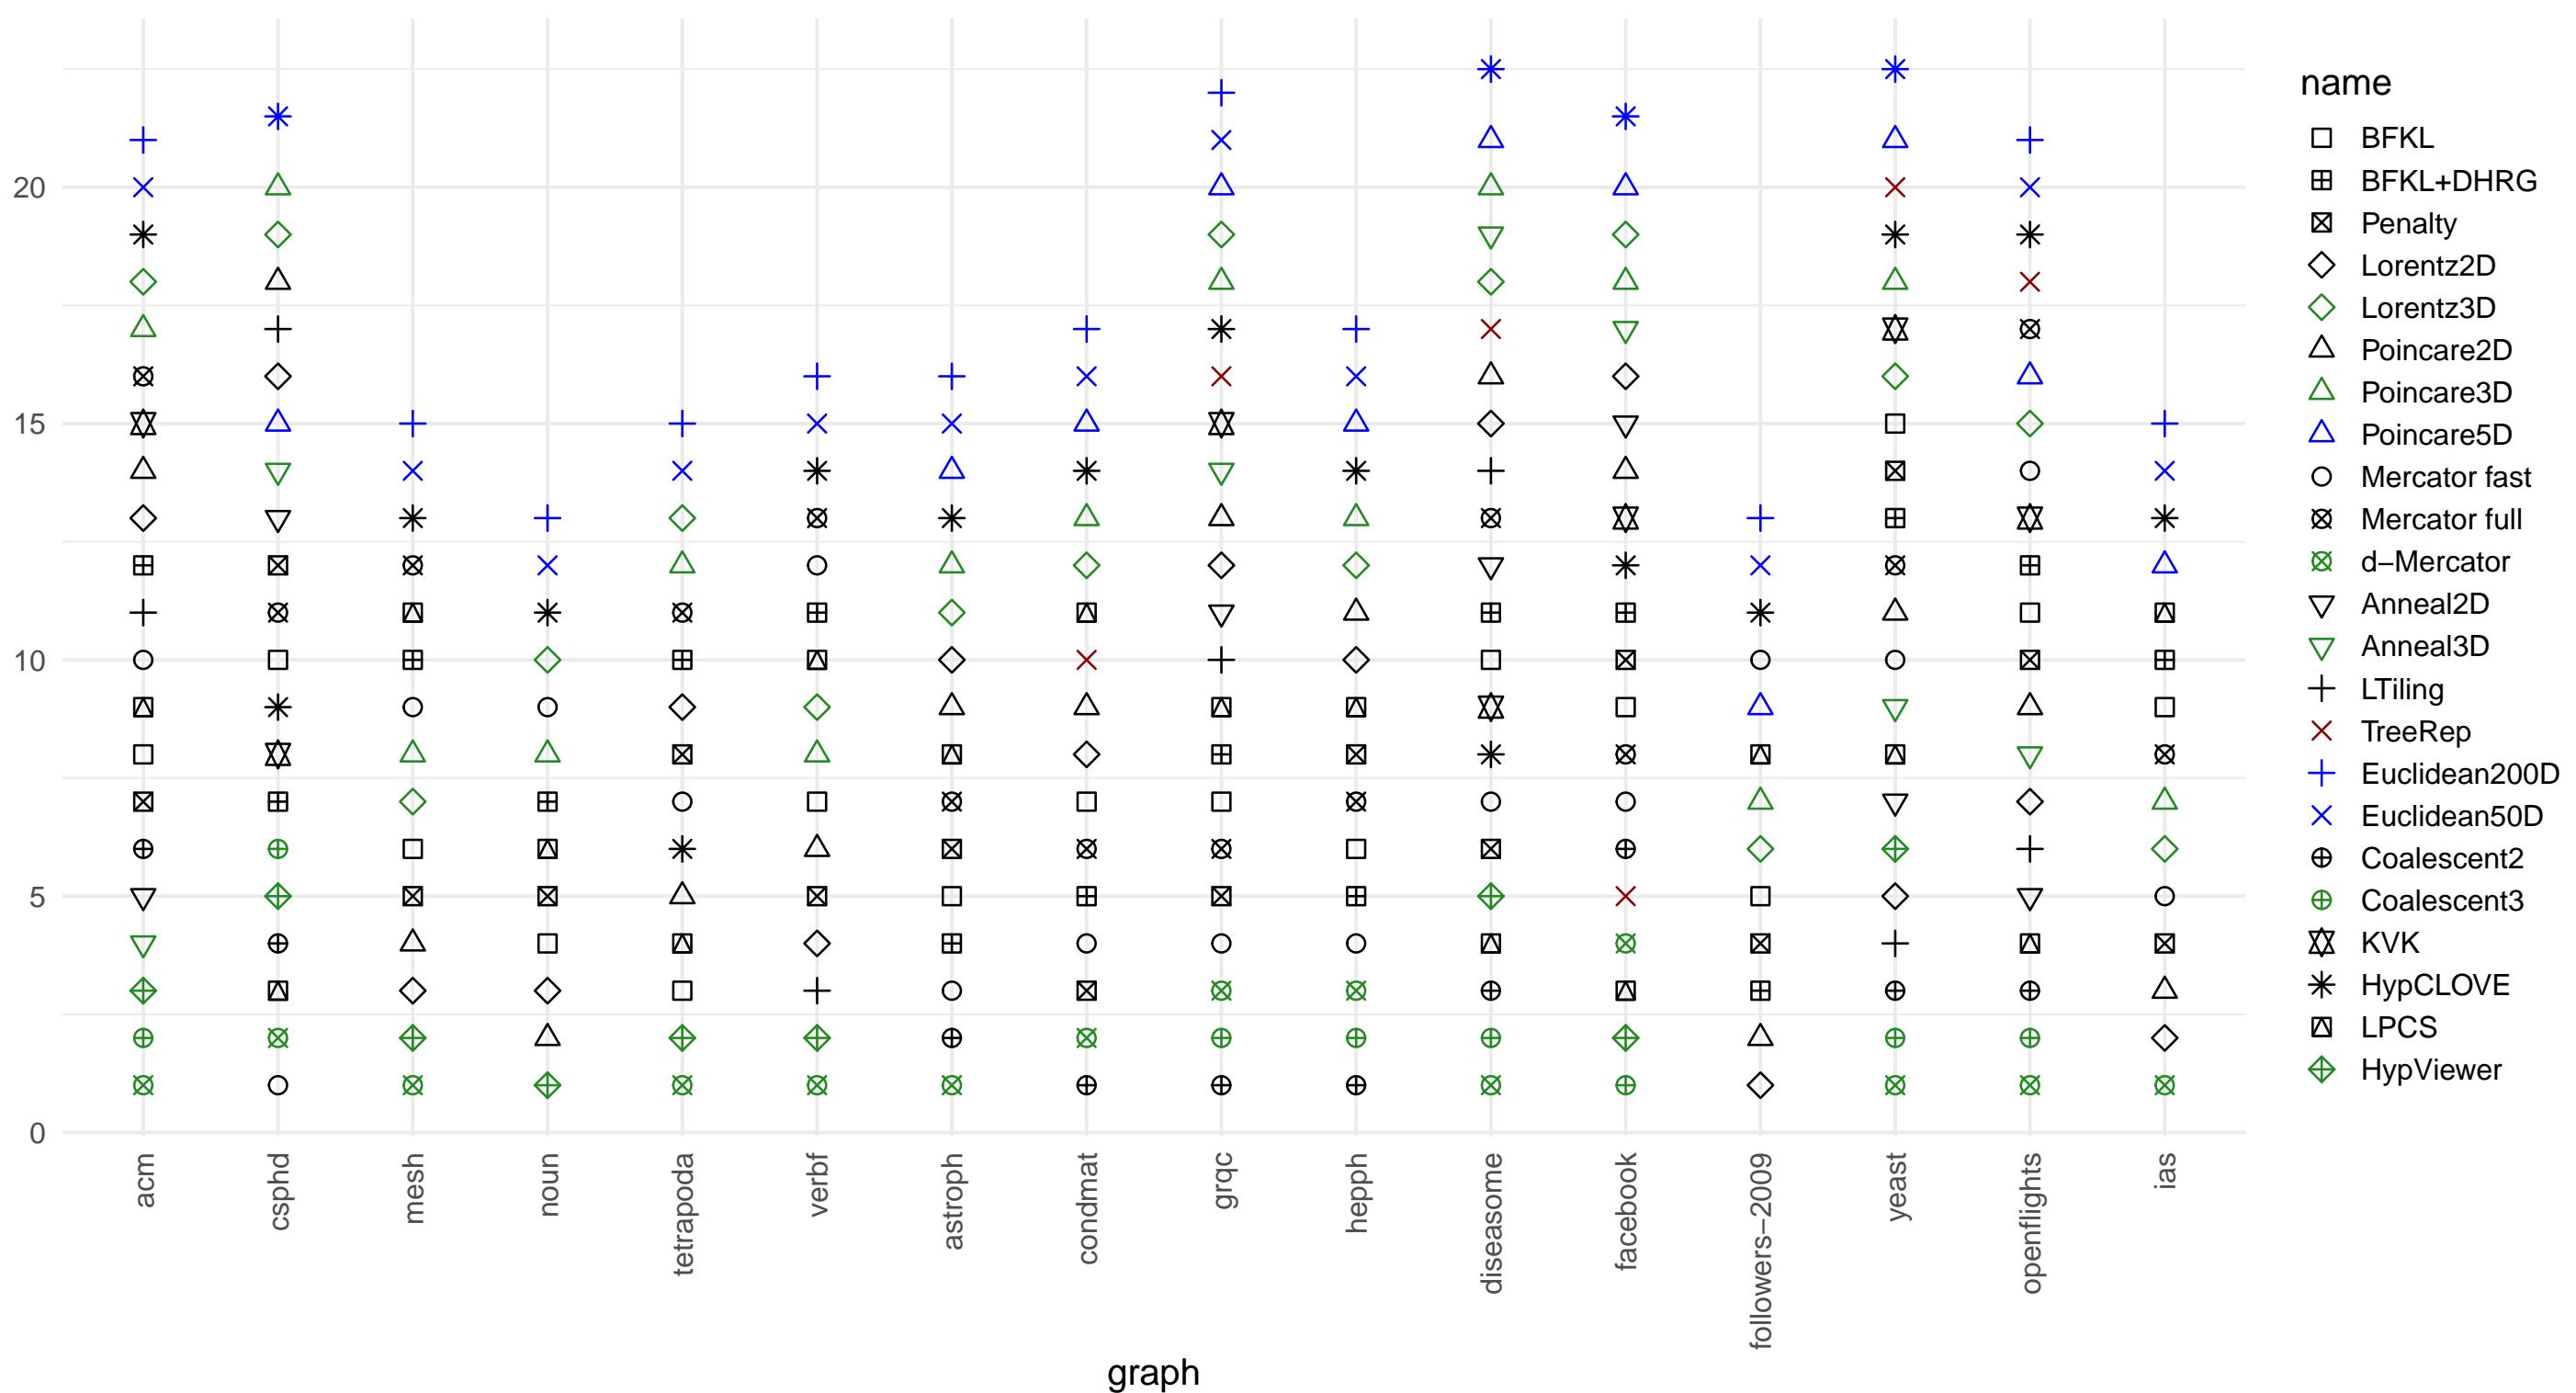

Supplement: supplementary_material [file real-world_MAP_ranking.pdf › bridging/tables/real-world_MAP_ranking.pdf]

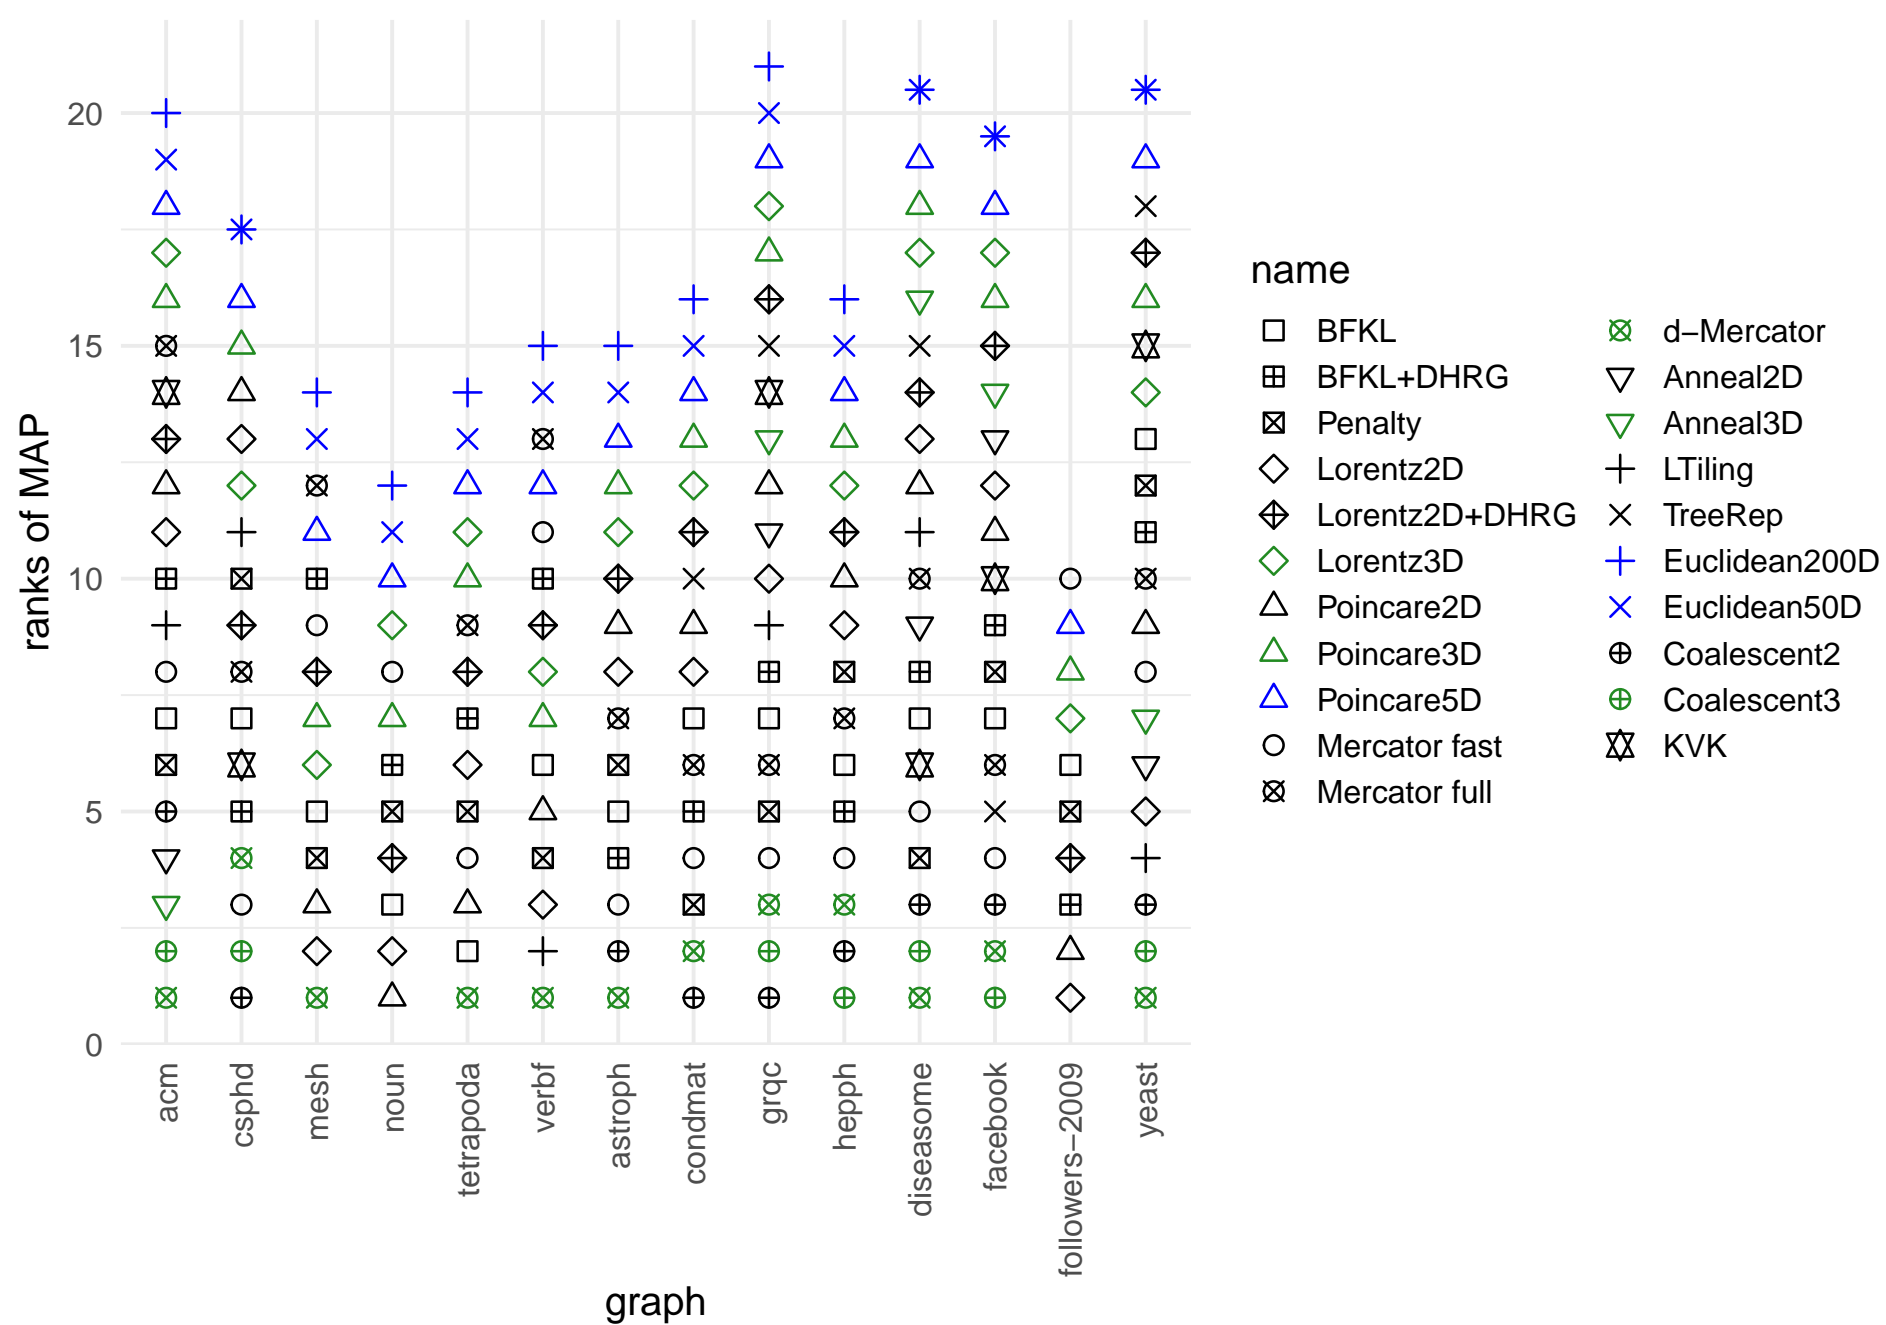

Supplement: supplementary_material [file real-world_MAP_ranking.pdf › bridging/tables/real-world_MAP_ranking.pdf]

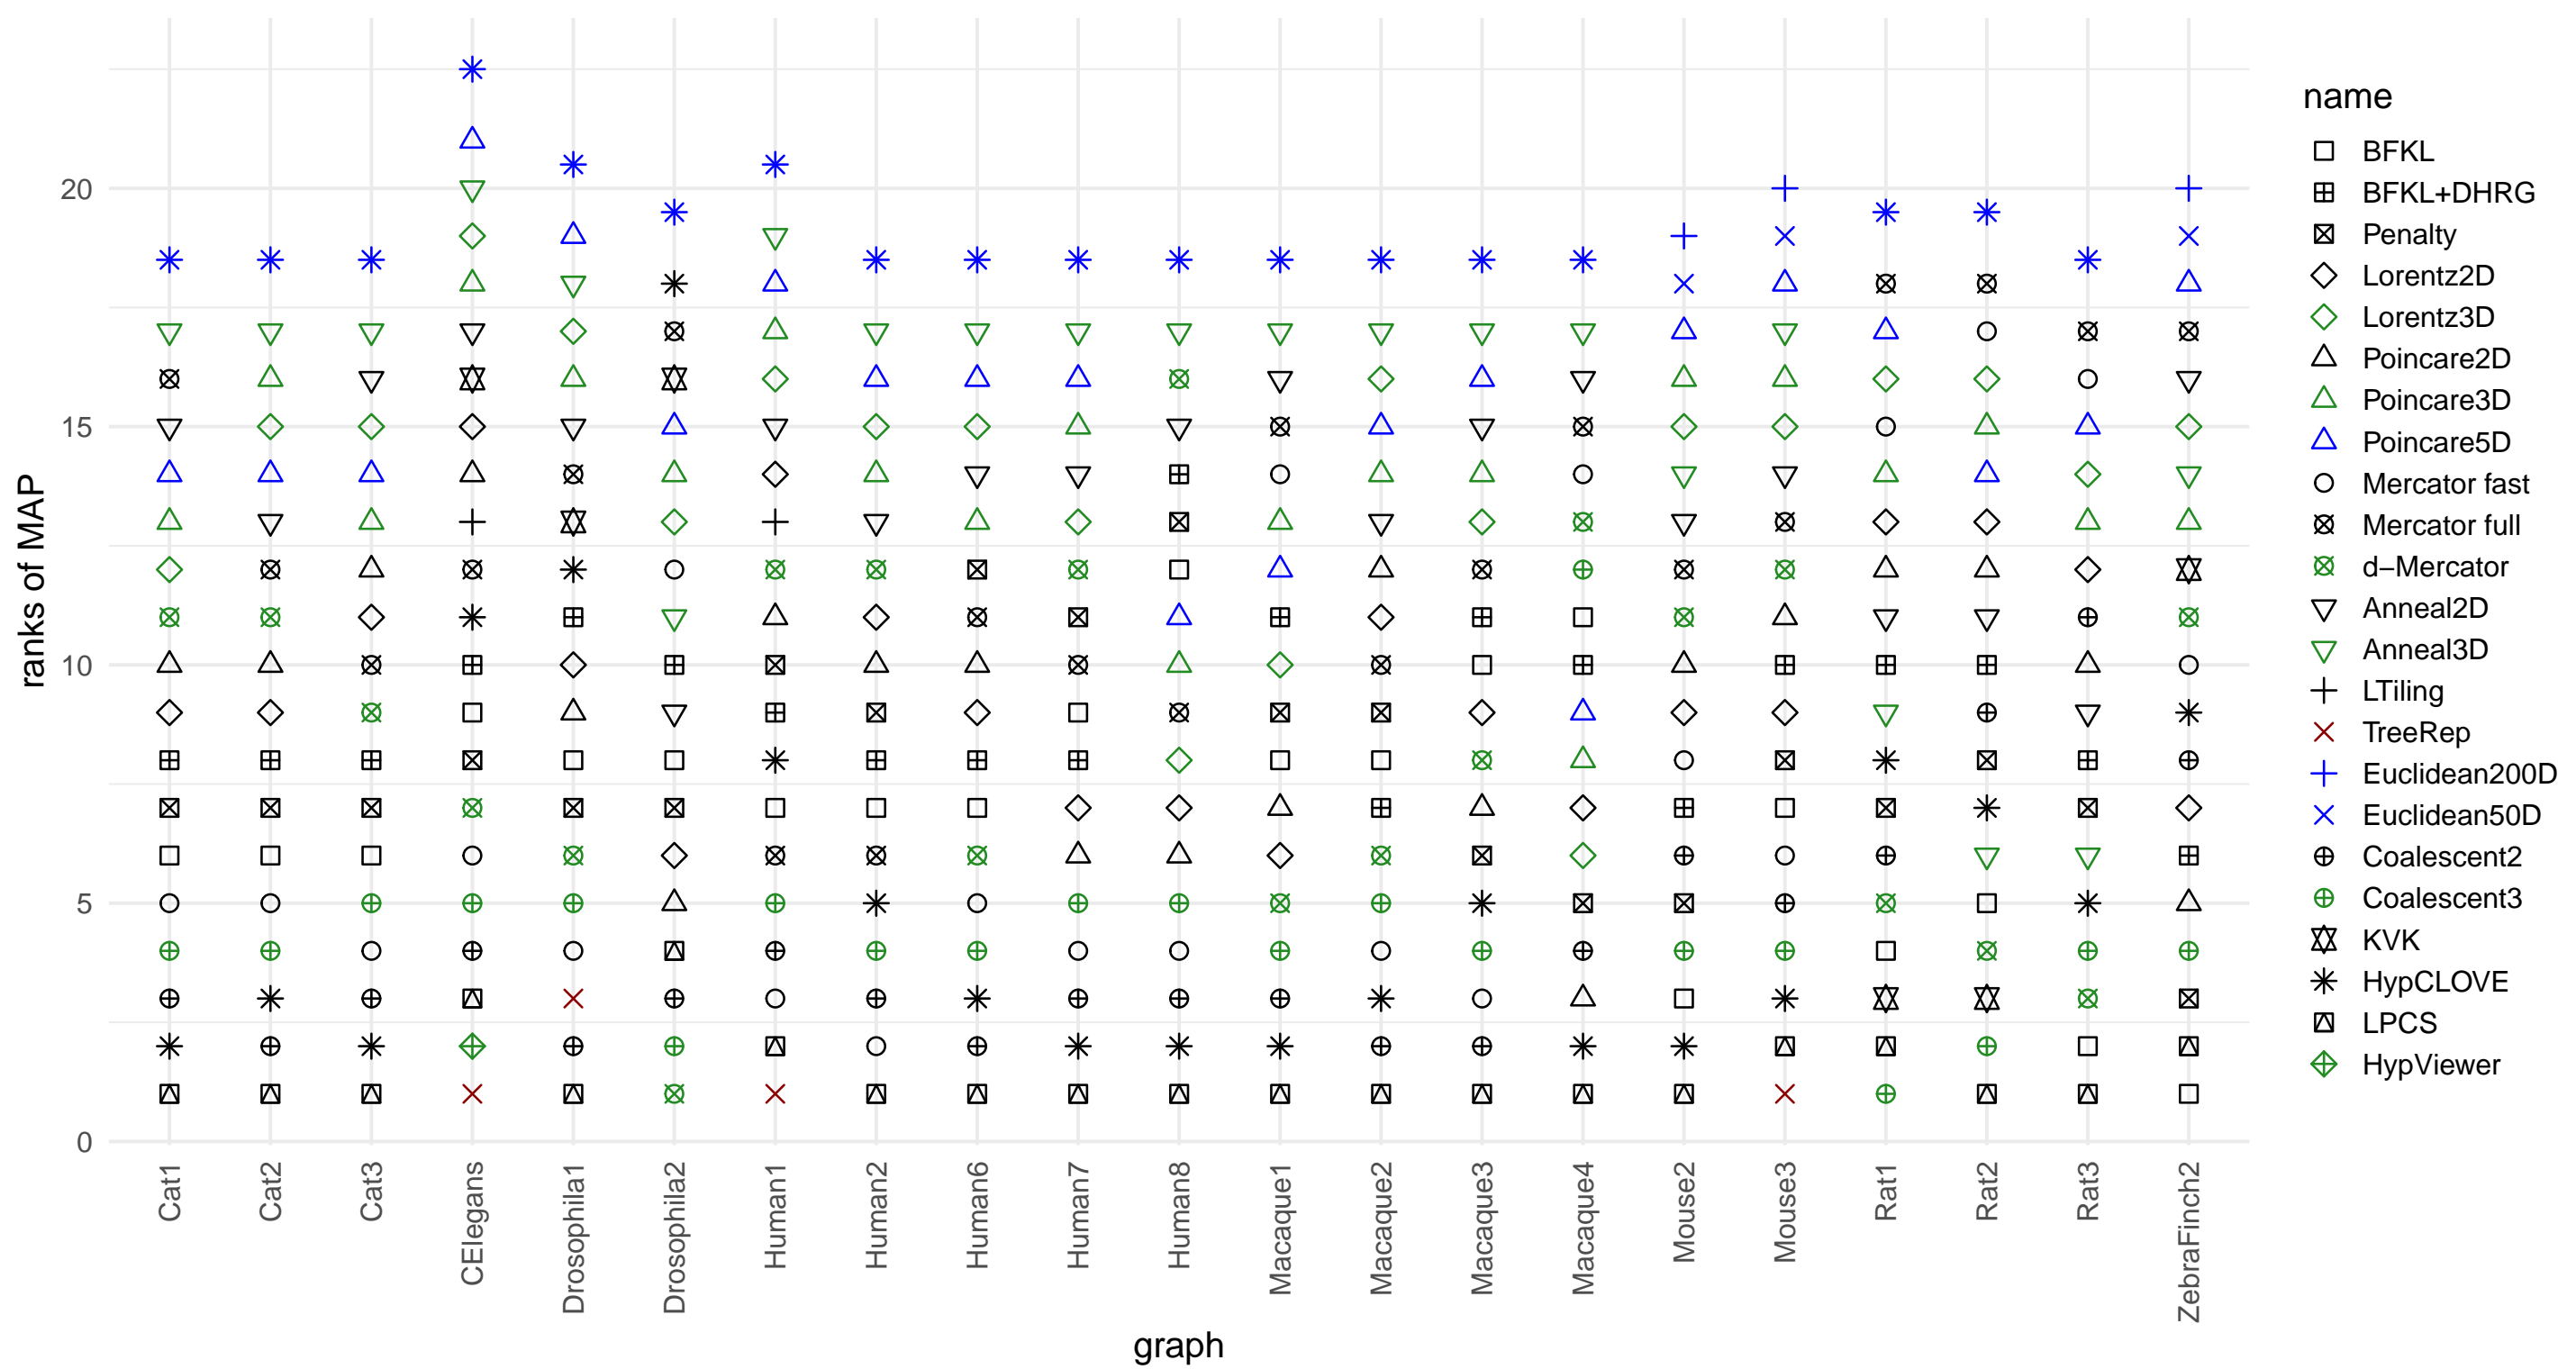

Supplement: supplementary_material [file real-world_MAP_ranking_conn.pdf › bridging/tables/real-world_MAP_ranking_conn.pdf]

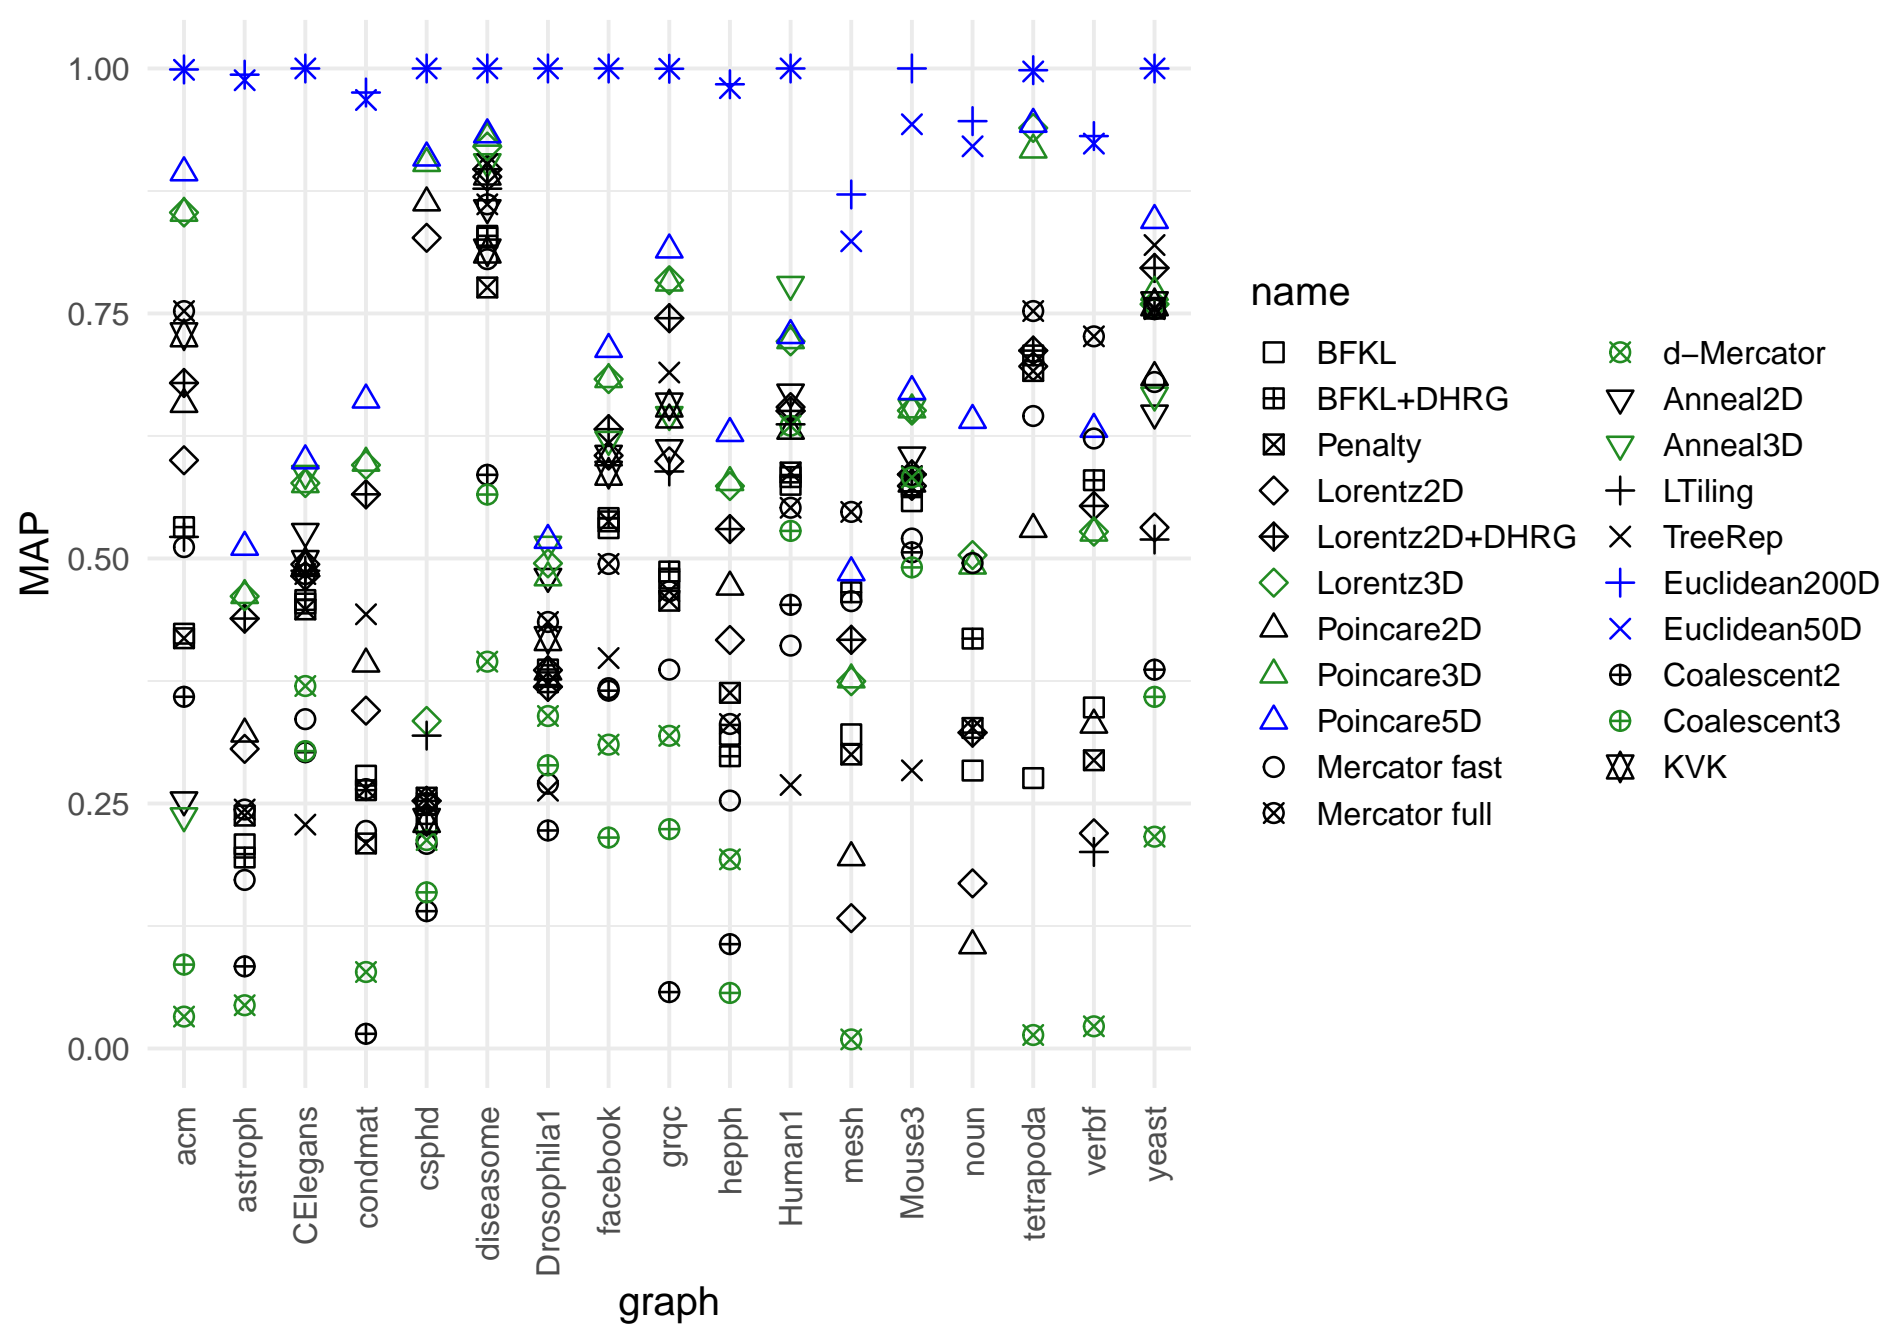

Supplement: supplementary_material [file real-world_MAP_short.pdf › bridging/tables/real-world_MAP_short.pdf]

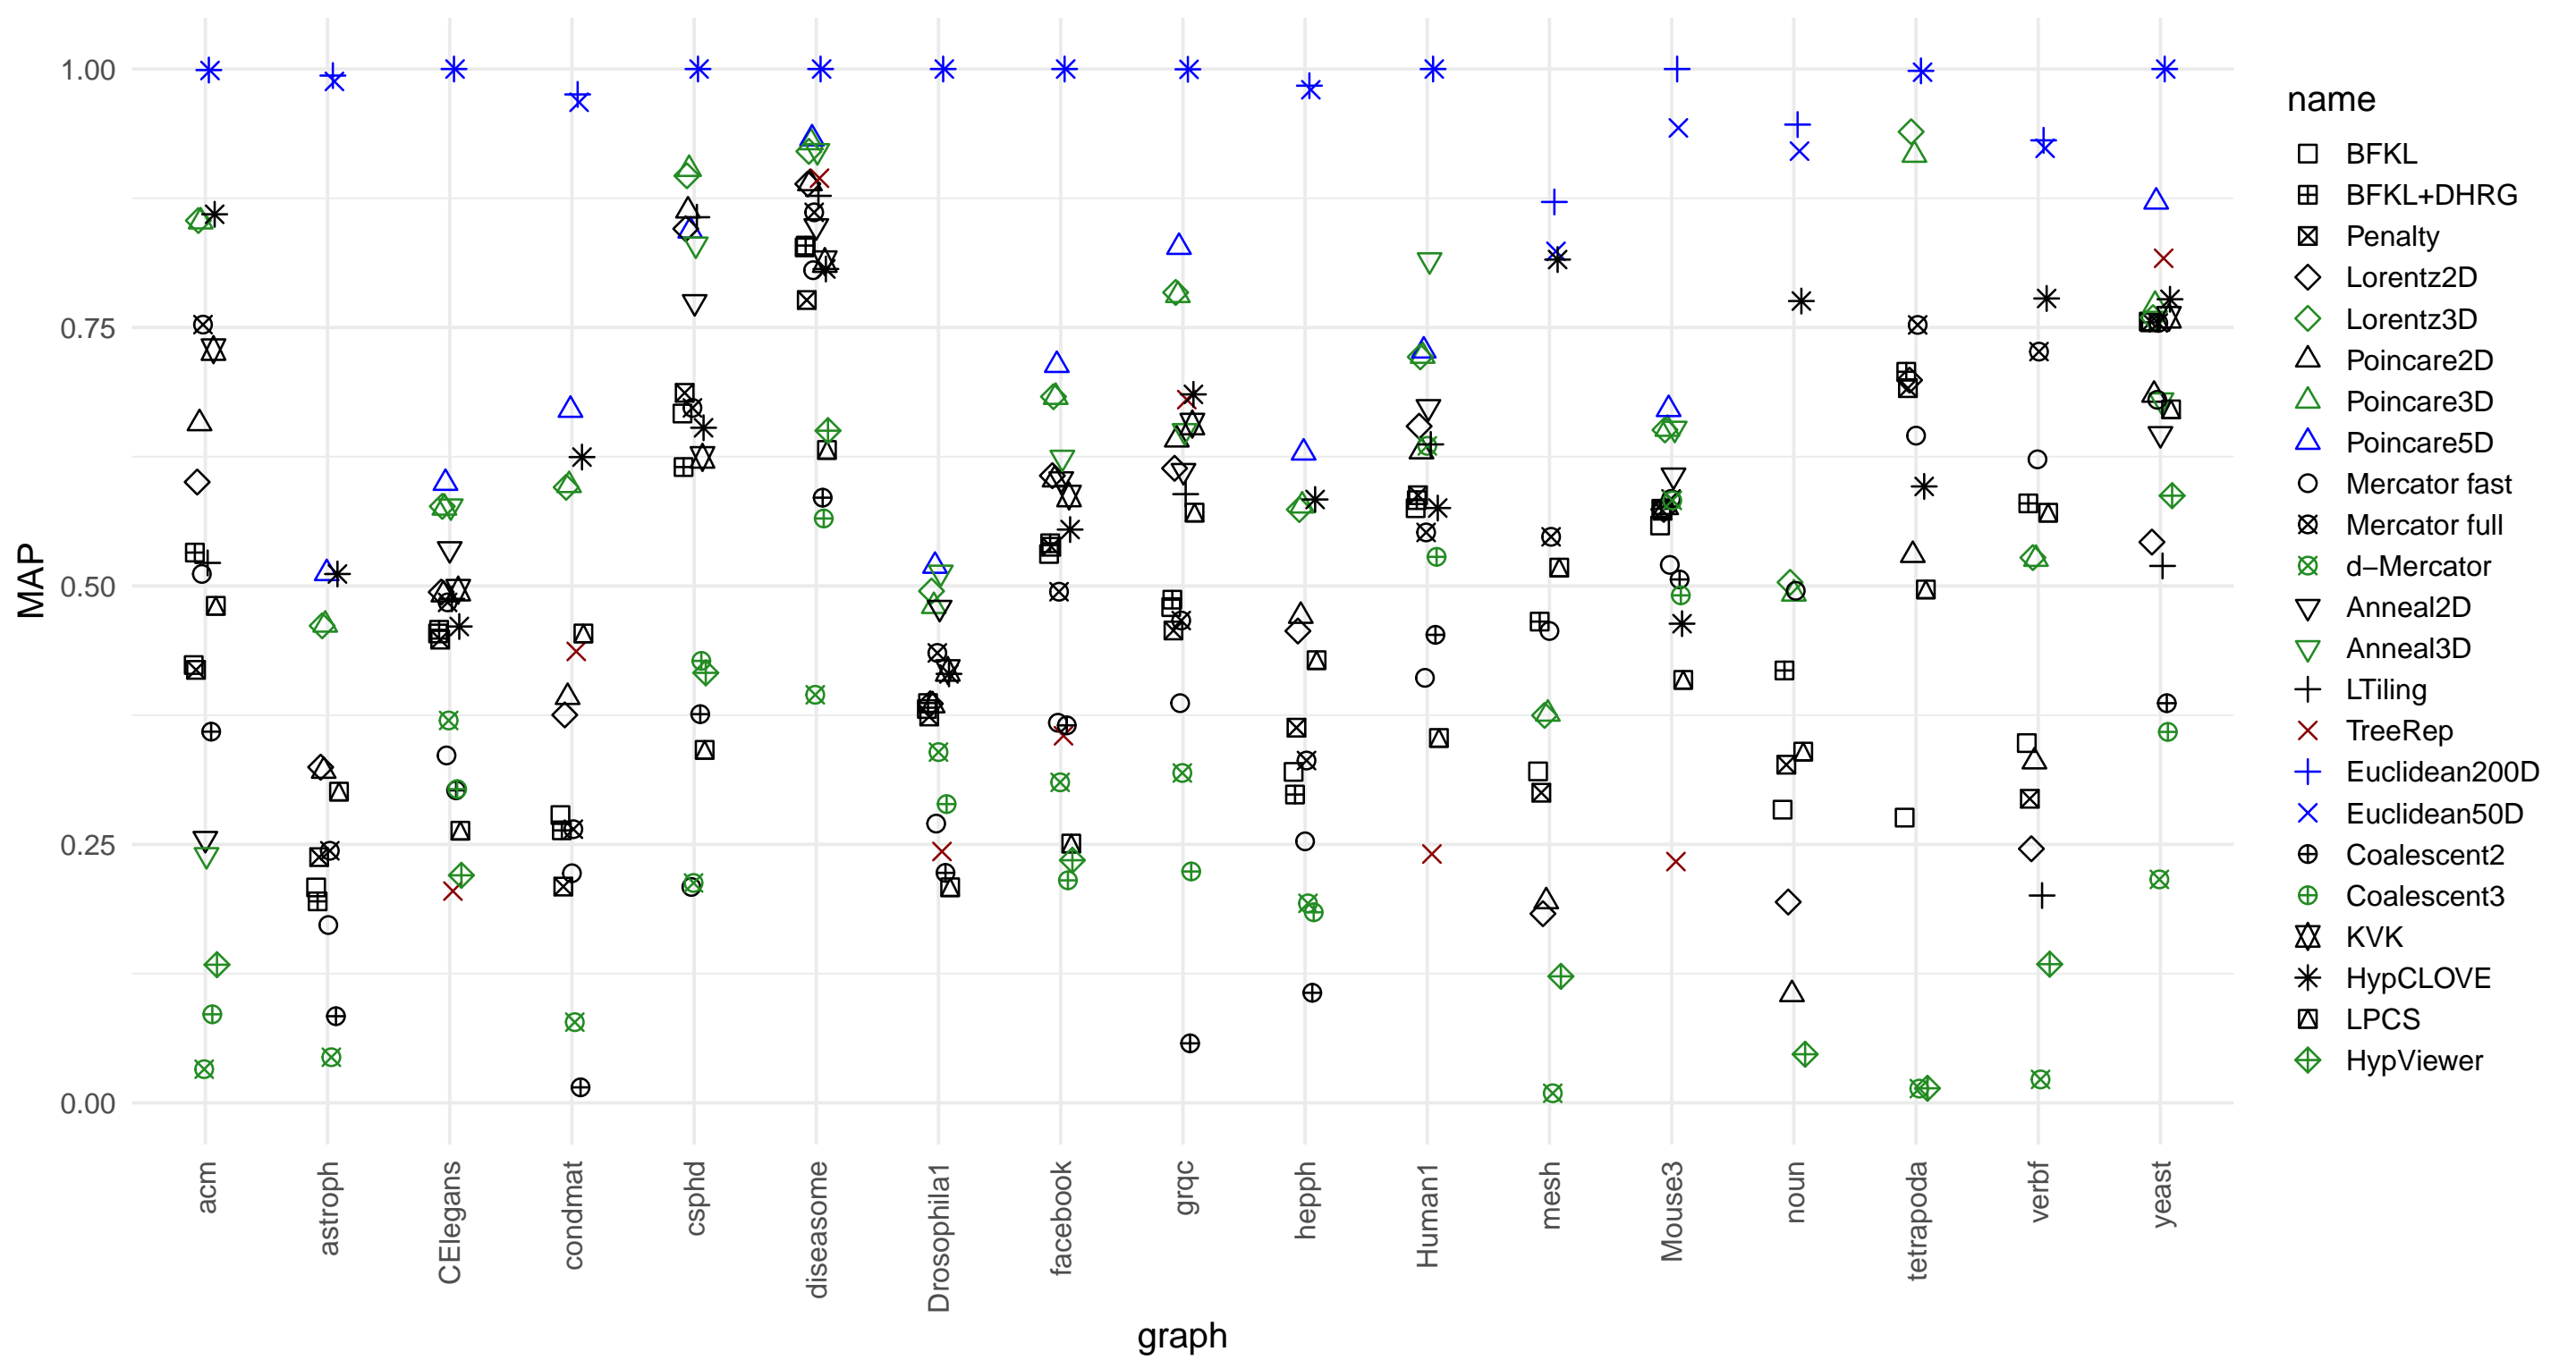

Supplement: supplementary_material [file real-world_MAP_short.pdf › bridging/tables/real-world_MAP_short.pdf]

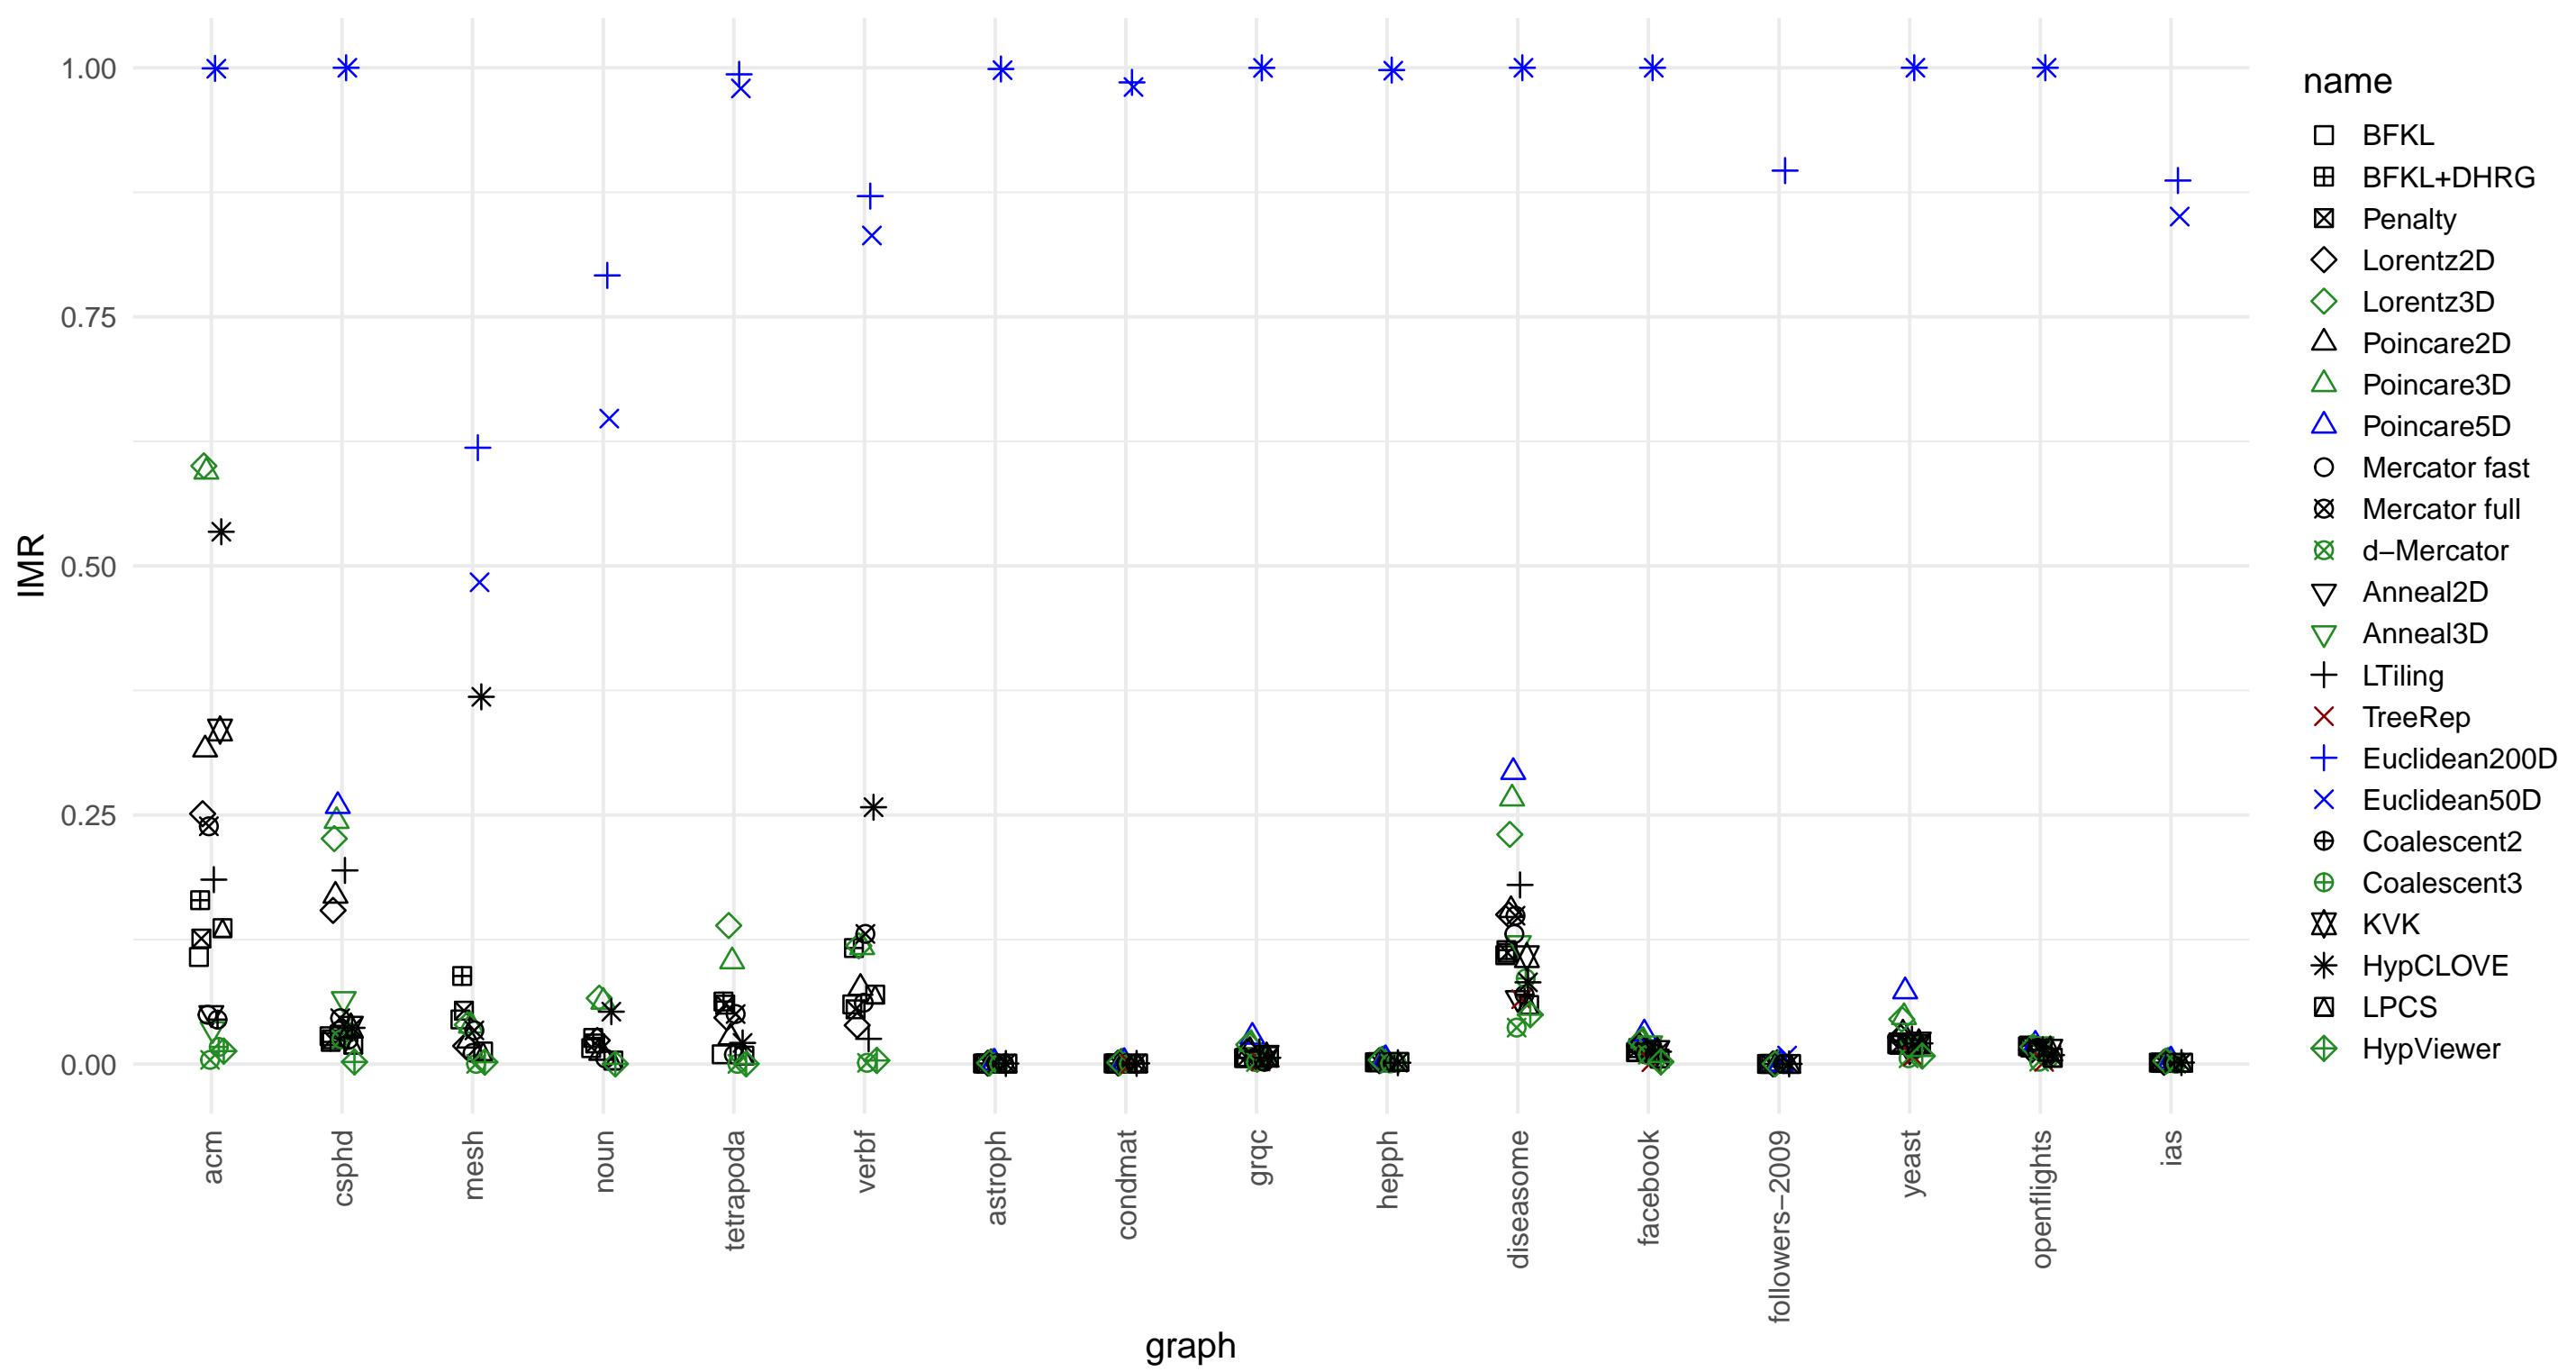

Supplement: supplementary_material [file real-world_MR.pdf › bridging/tables/real-world_MR.pdf]

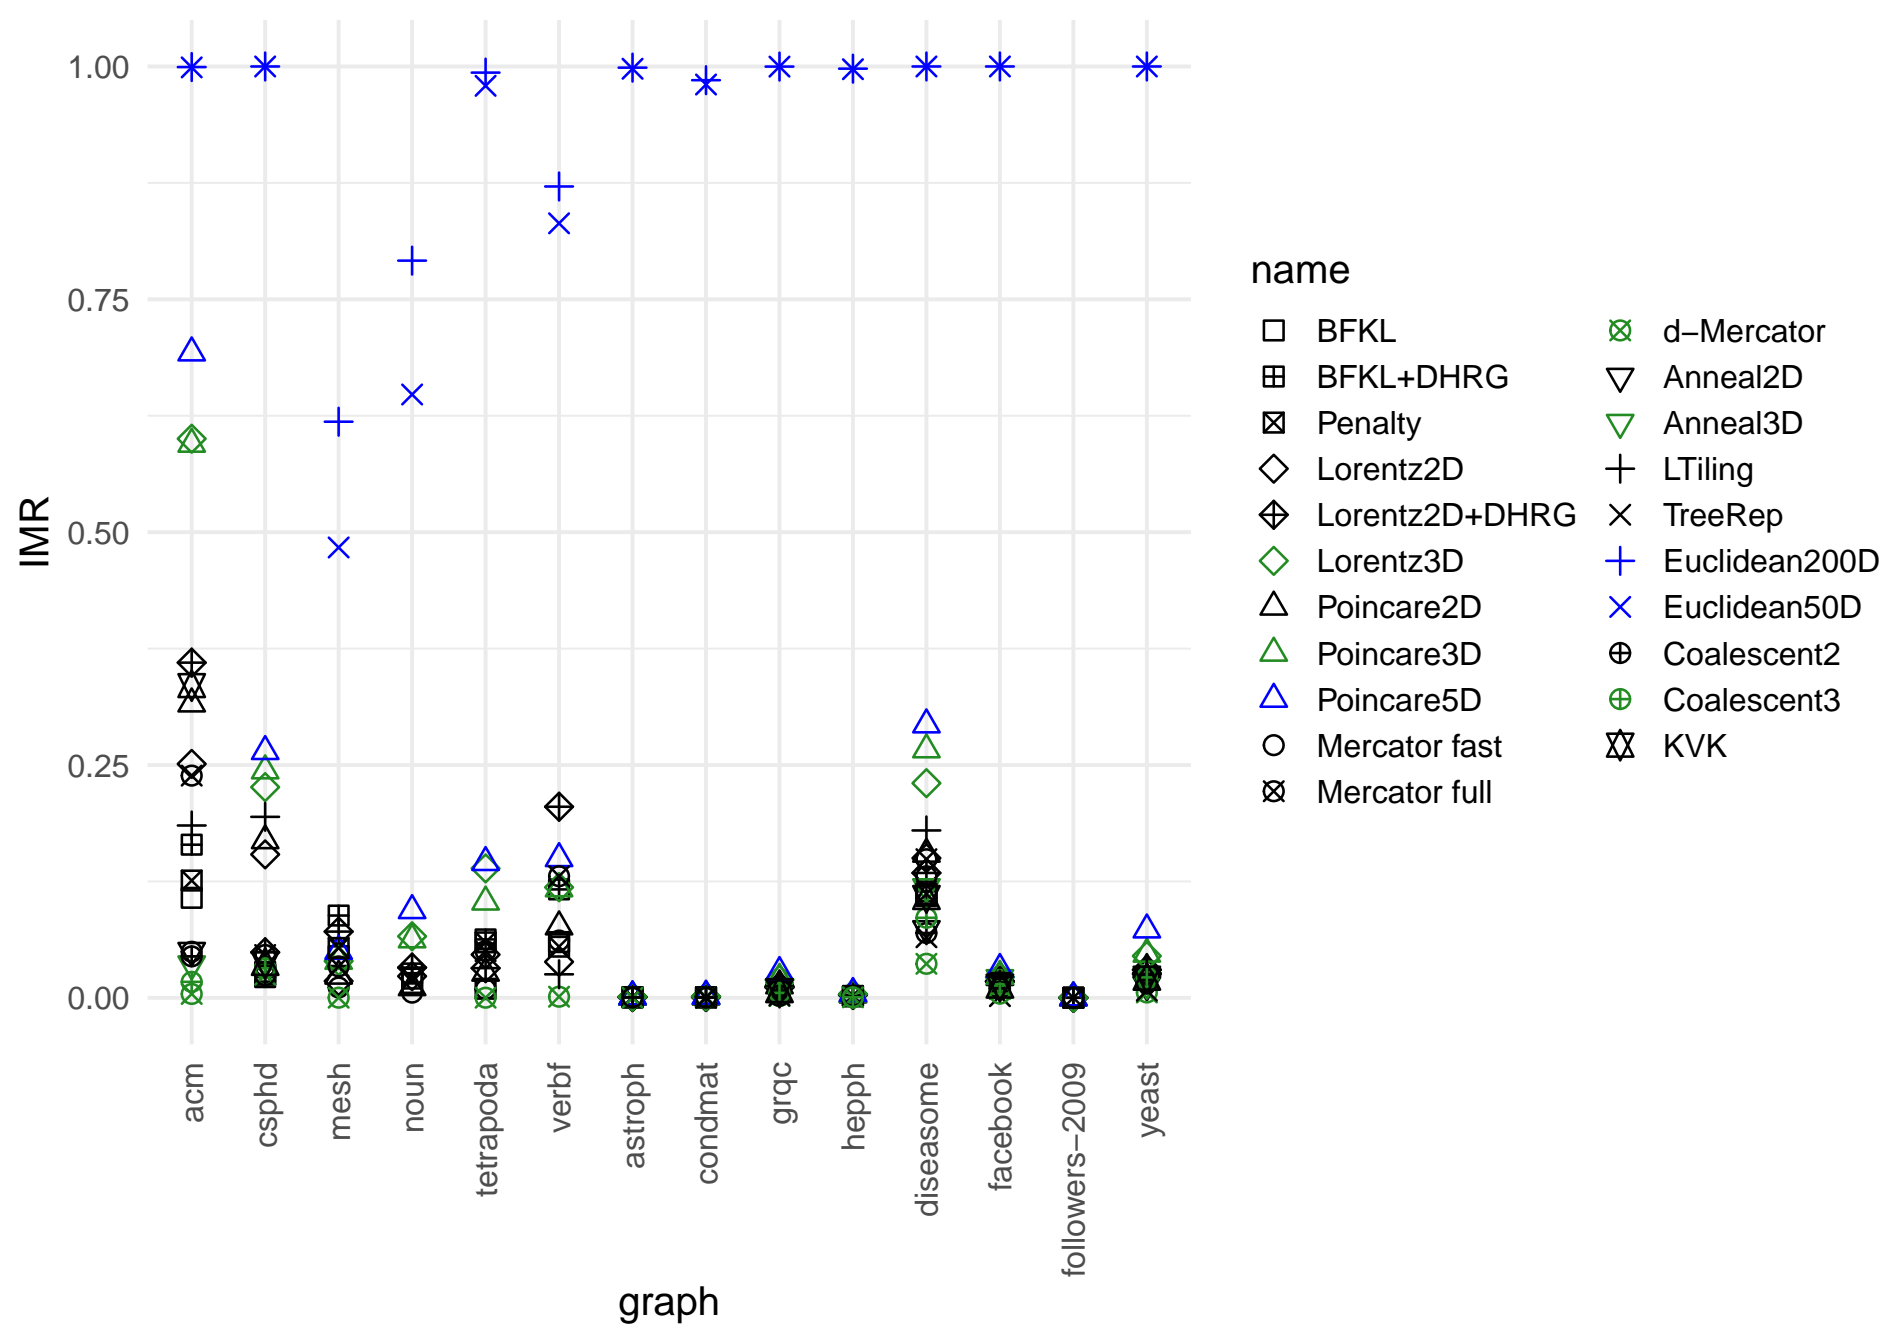

Supplement: supplementary_material [file real-world_MR.pdf › bridging/tables/real-world_MR.pdf]

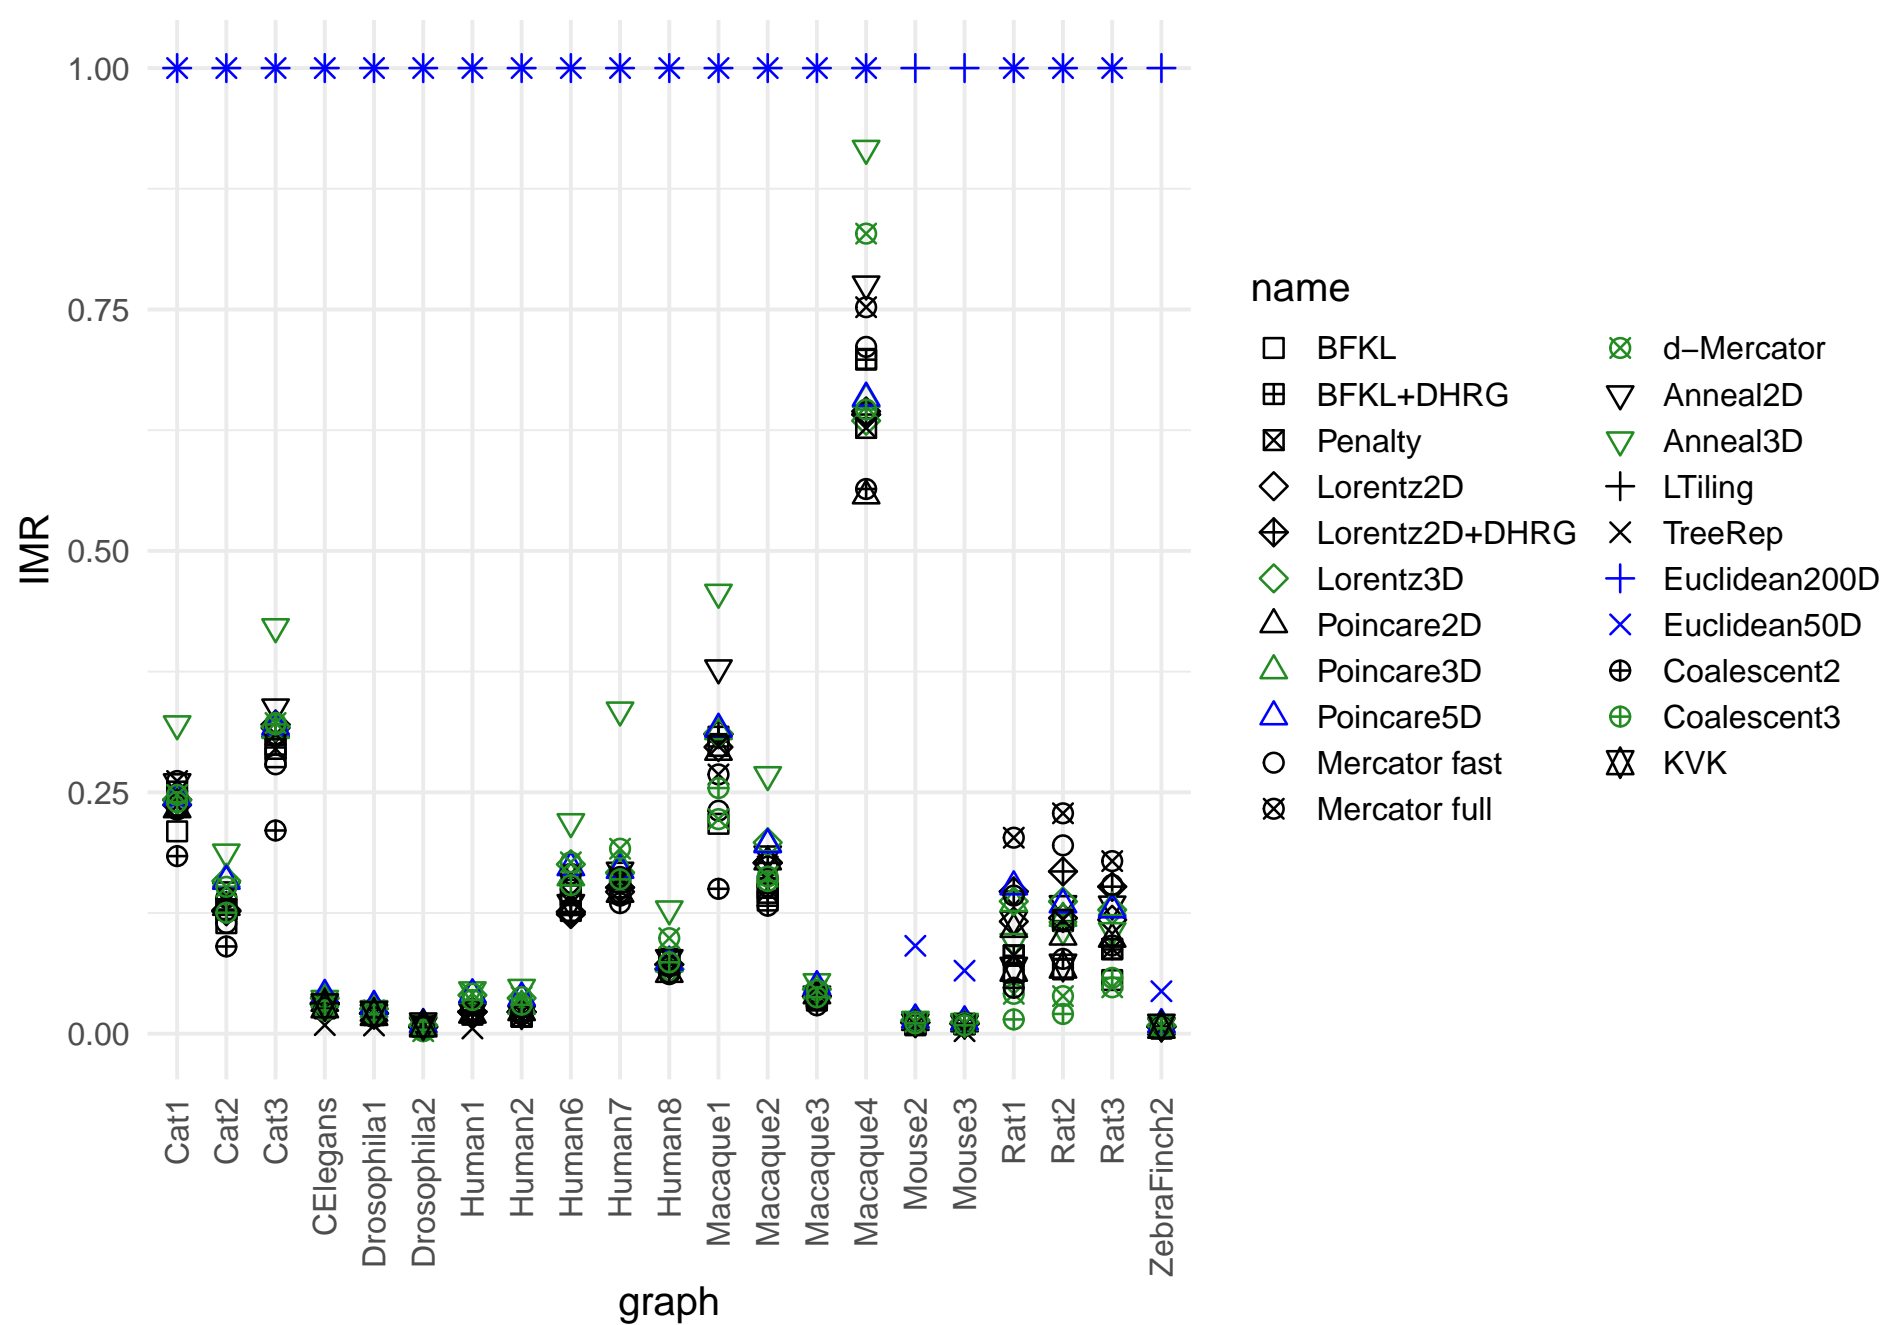

Supplement: supplementary_material [file real-world_MR_conn.pdf › bridging/tables/real-world_MR_conn.pdf]

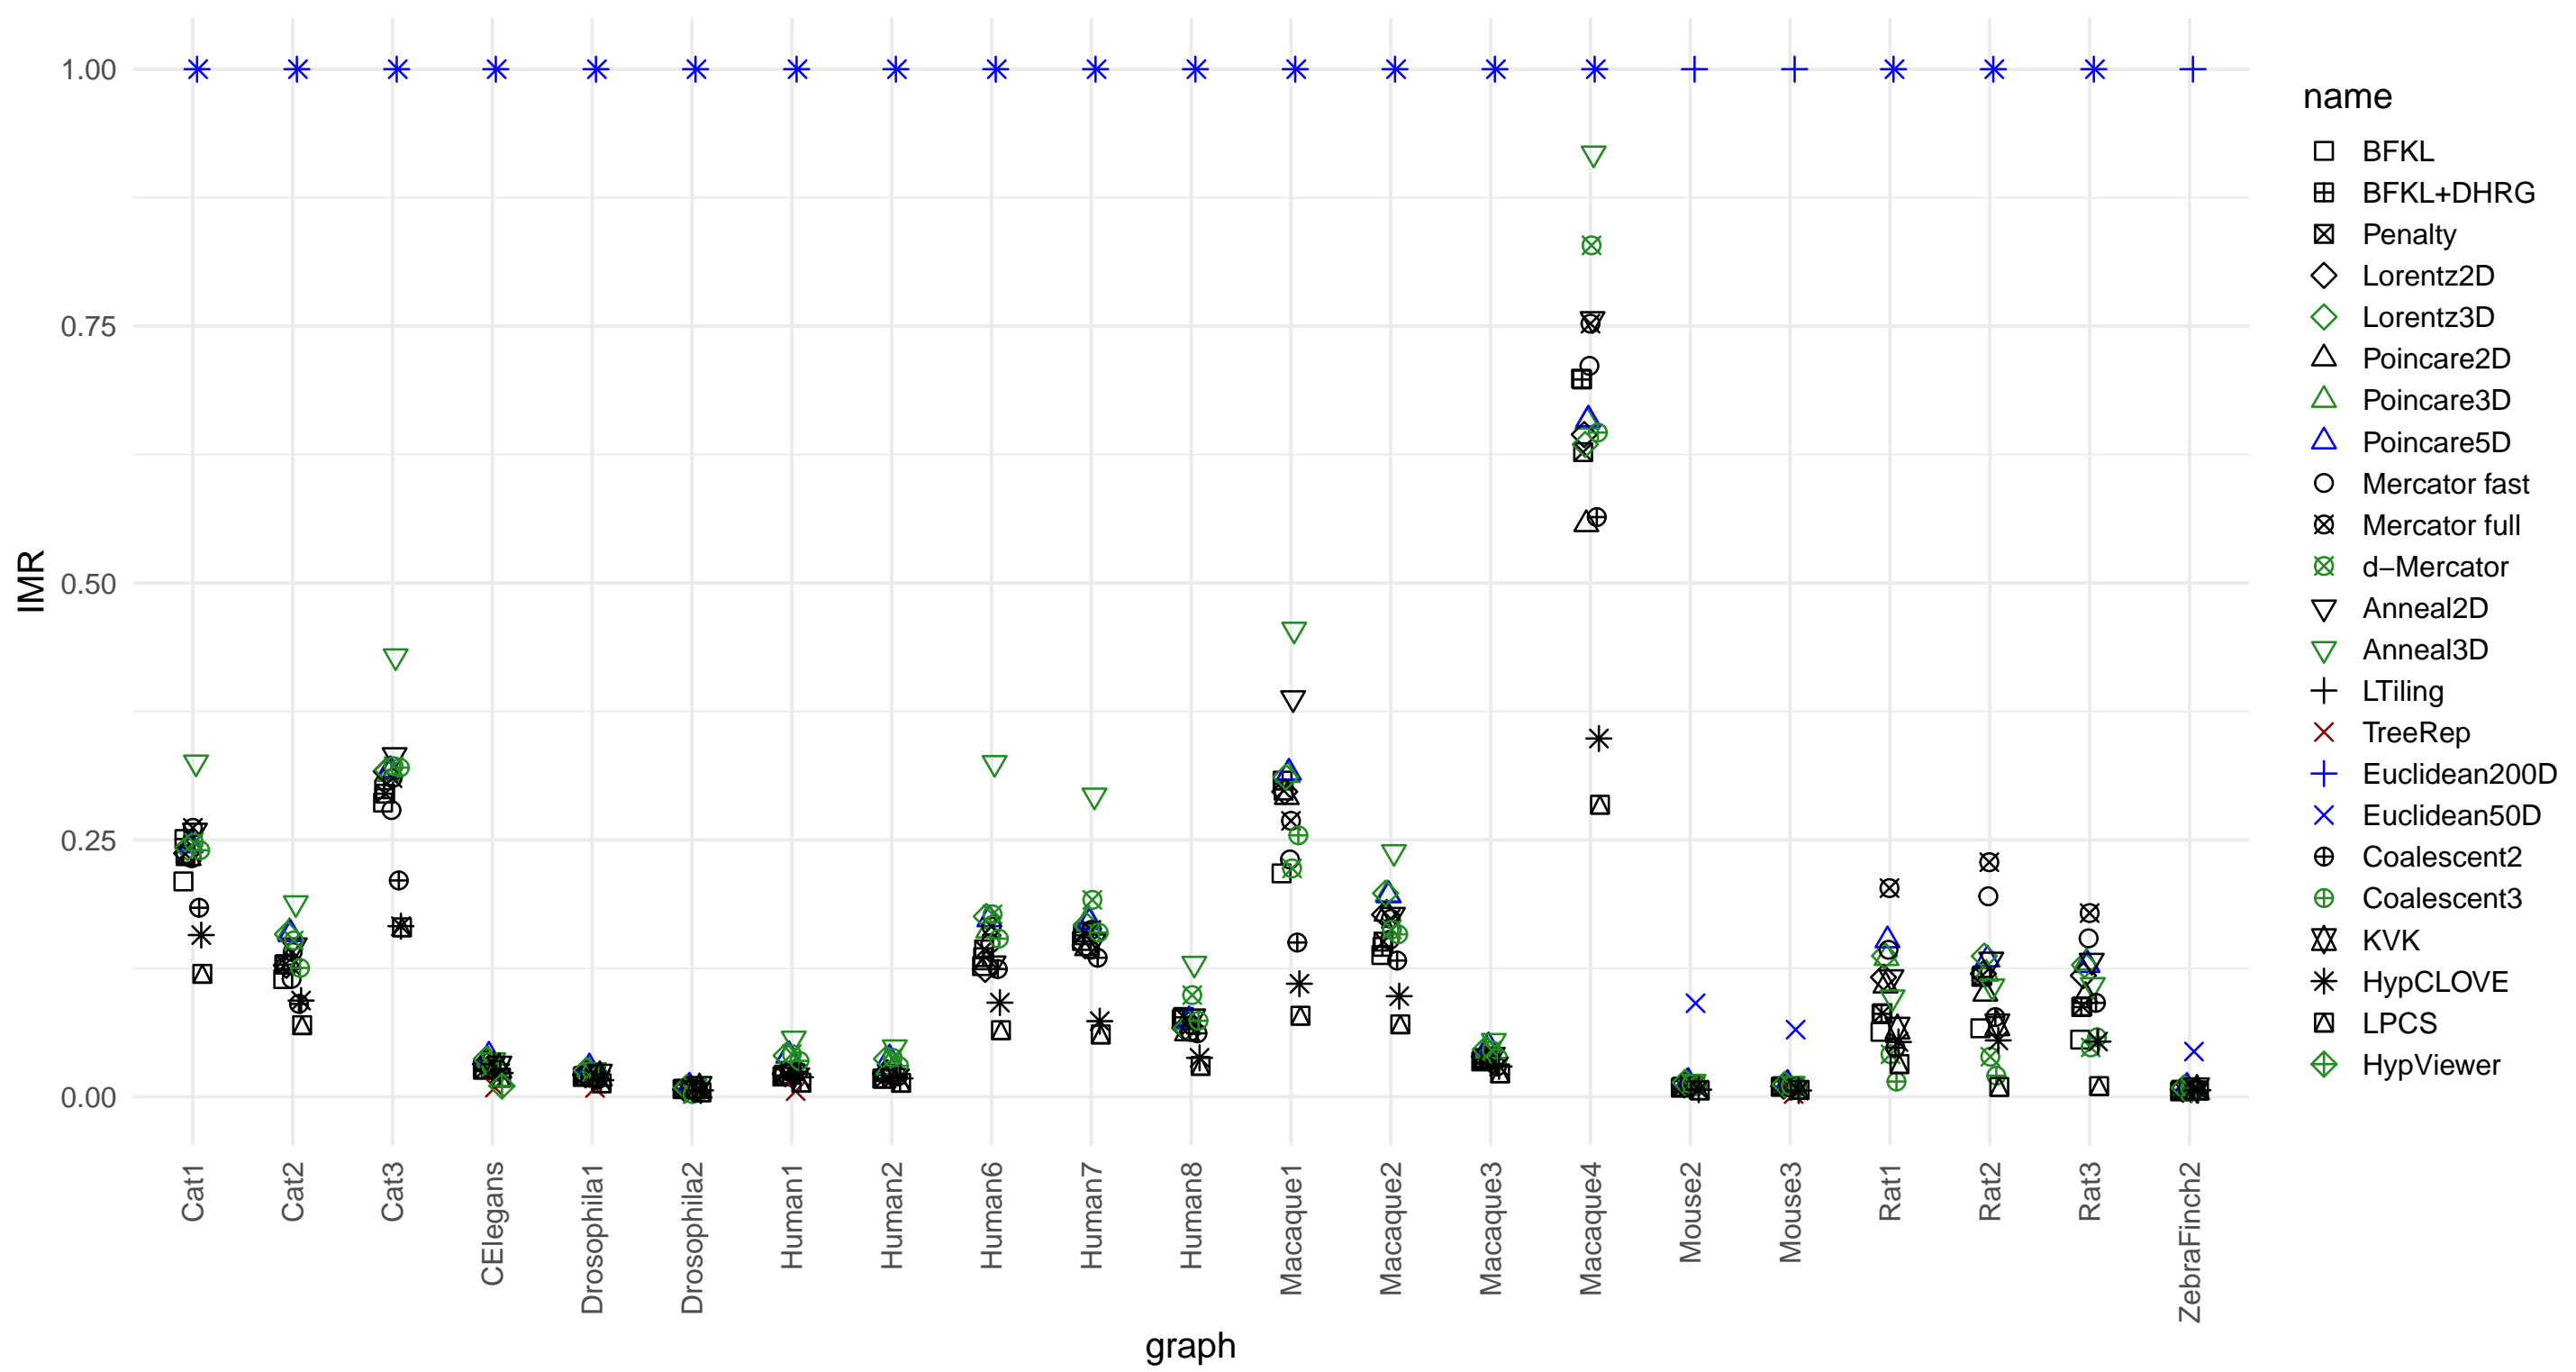

Supplement: supplementary_material [file real-world_MR_conn.pdf › bridging/tables/real-world_MR_conn.pdf]

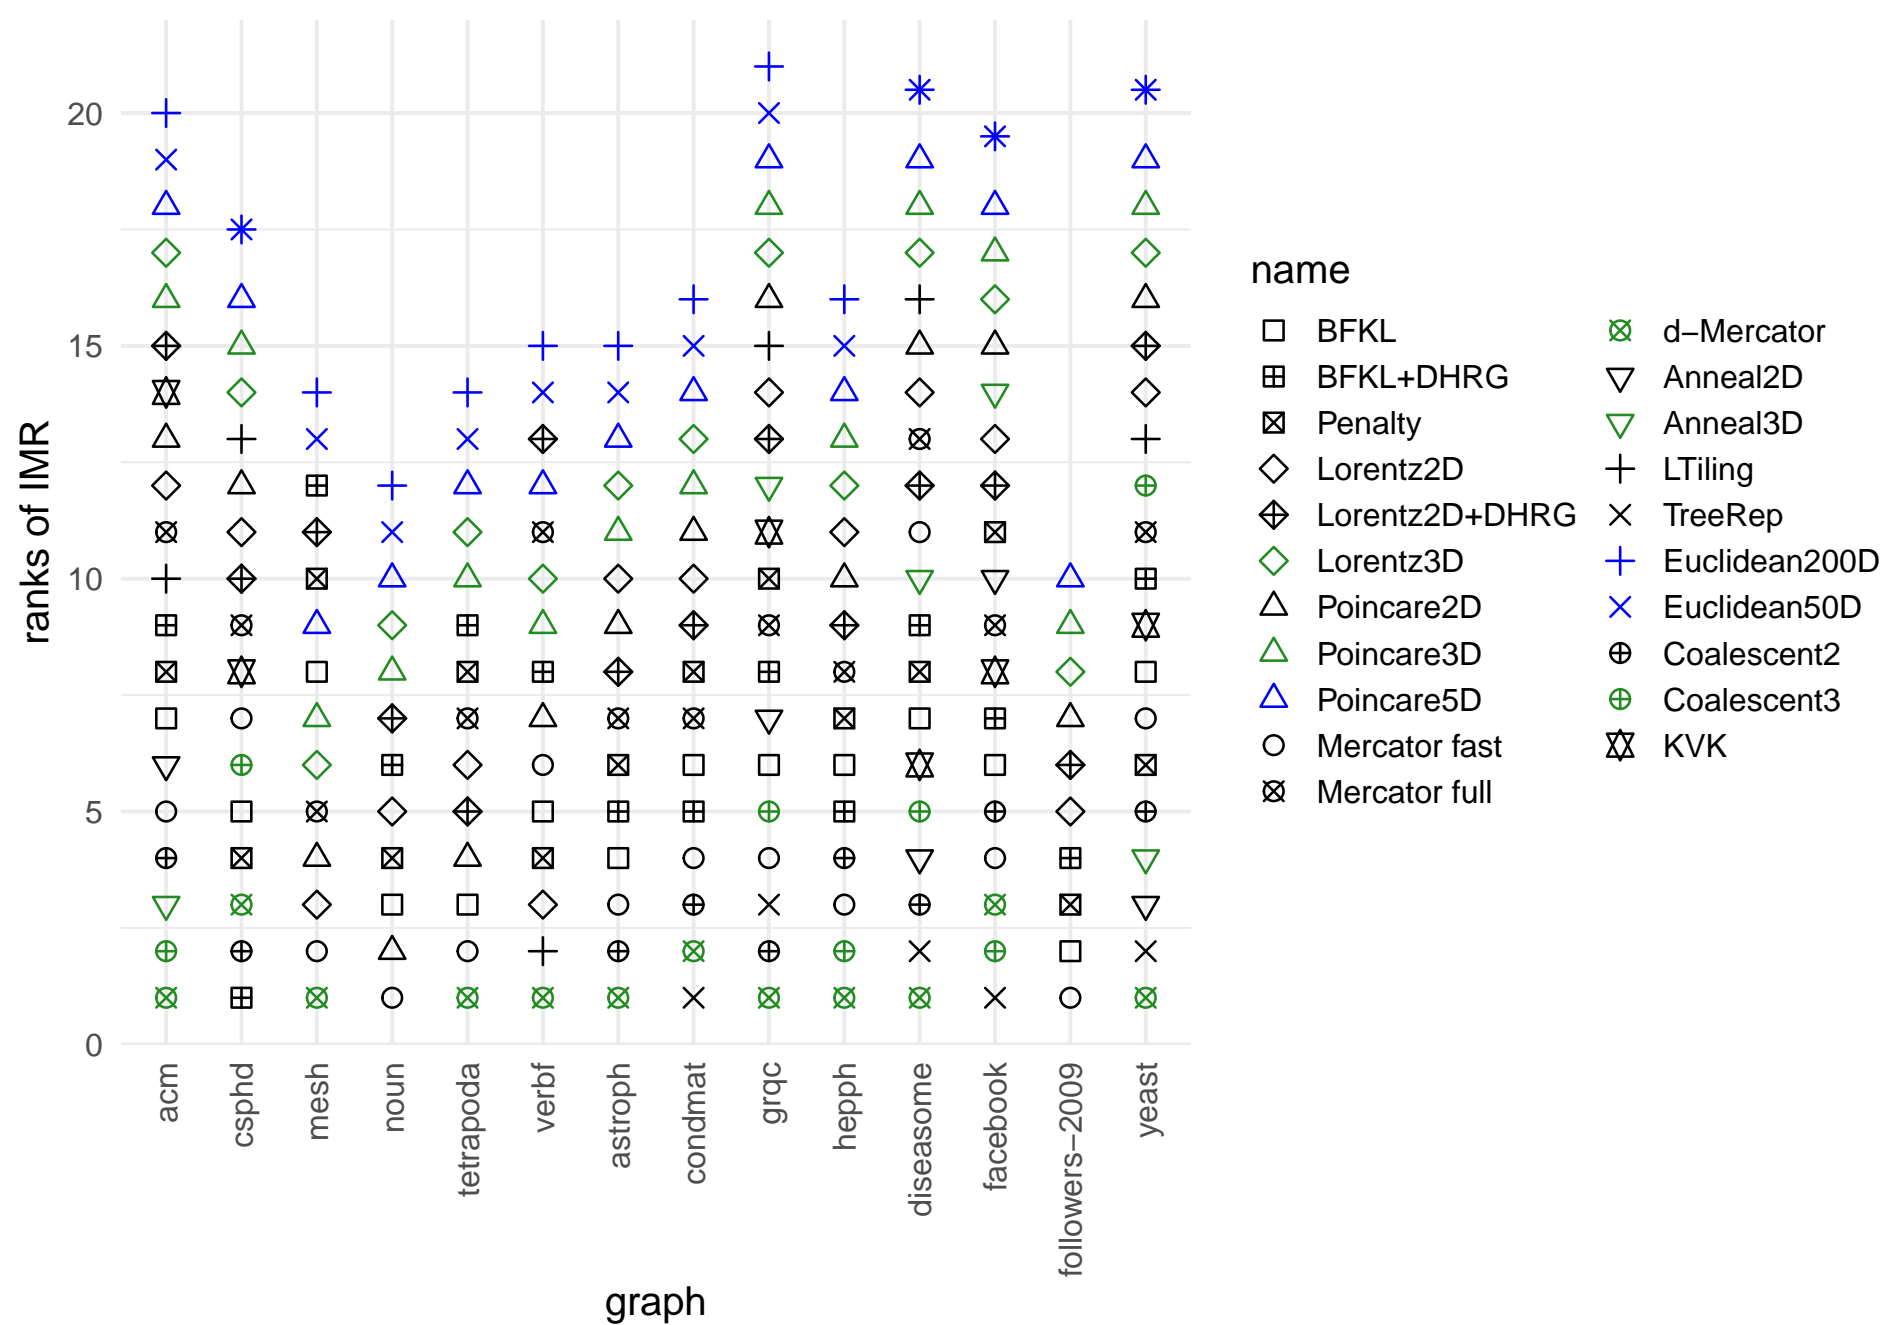

Supplement: supplementary_material [file real-world_MR_ranking.pdf › bridging/tables/real-world_MR_ranking.pdf]

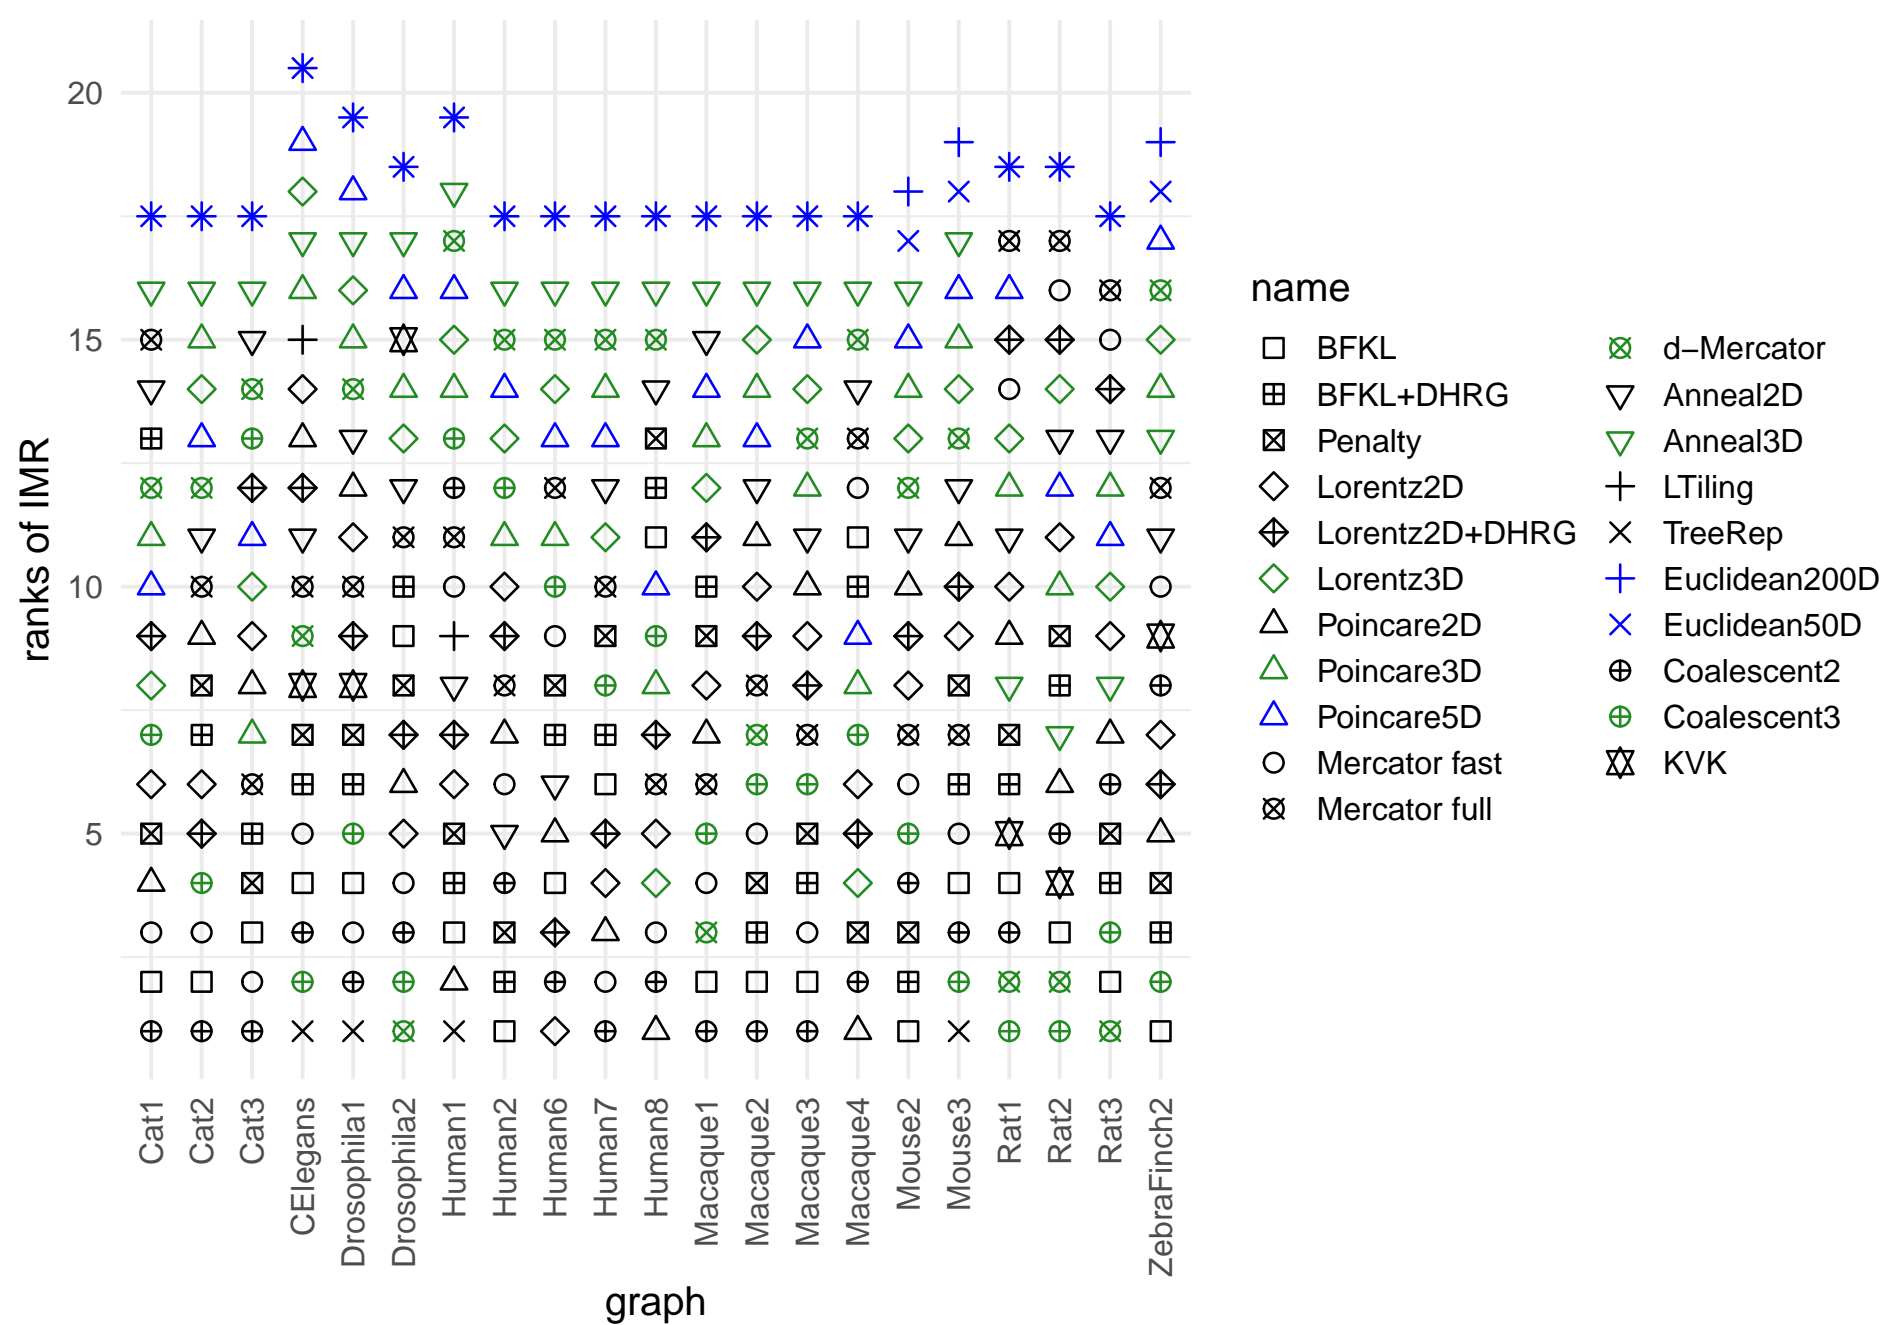

Supplement: supplementary_material [file real-world_MR_ranking_conn.pdf › bridging/tables/real-world_MR_ranking_conn.pdf]

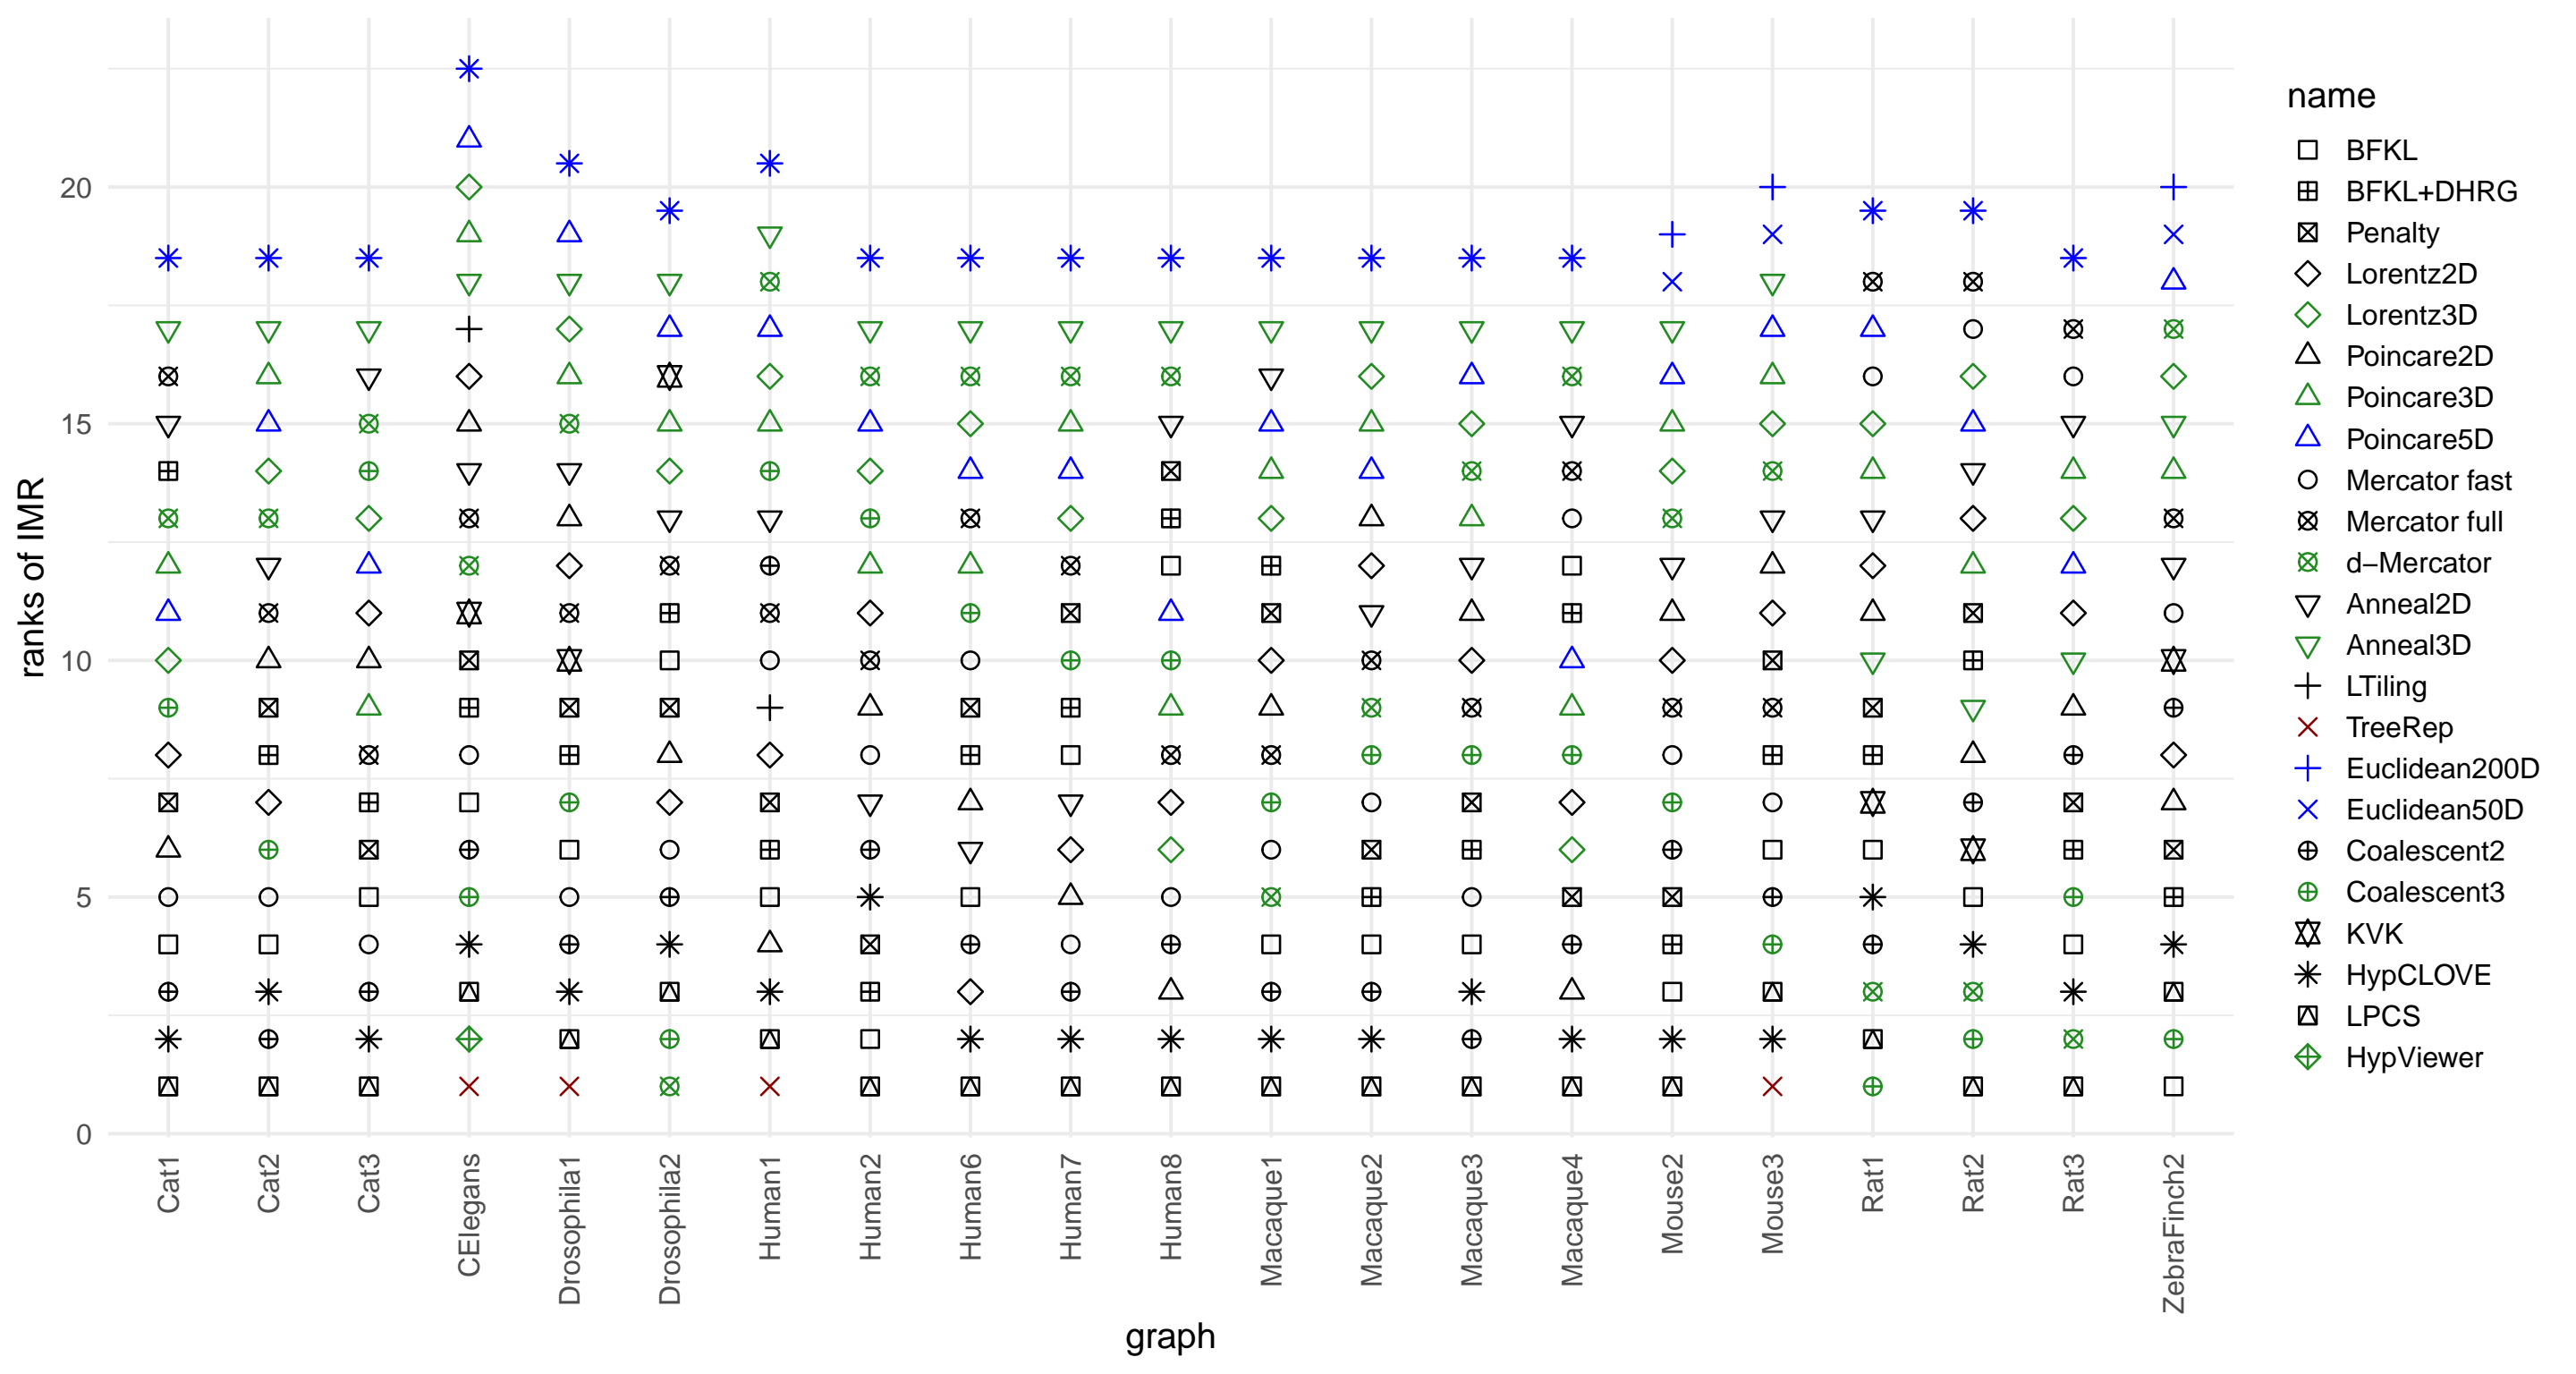

Supplement: supplementary_material [file real-world_MR_ranking_conn.pdf › bridging/tables/real-world_MR_ranking_conn.pdf]

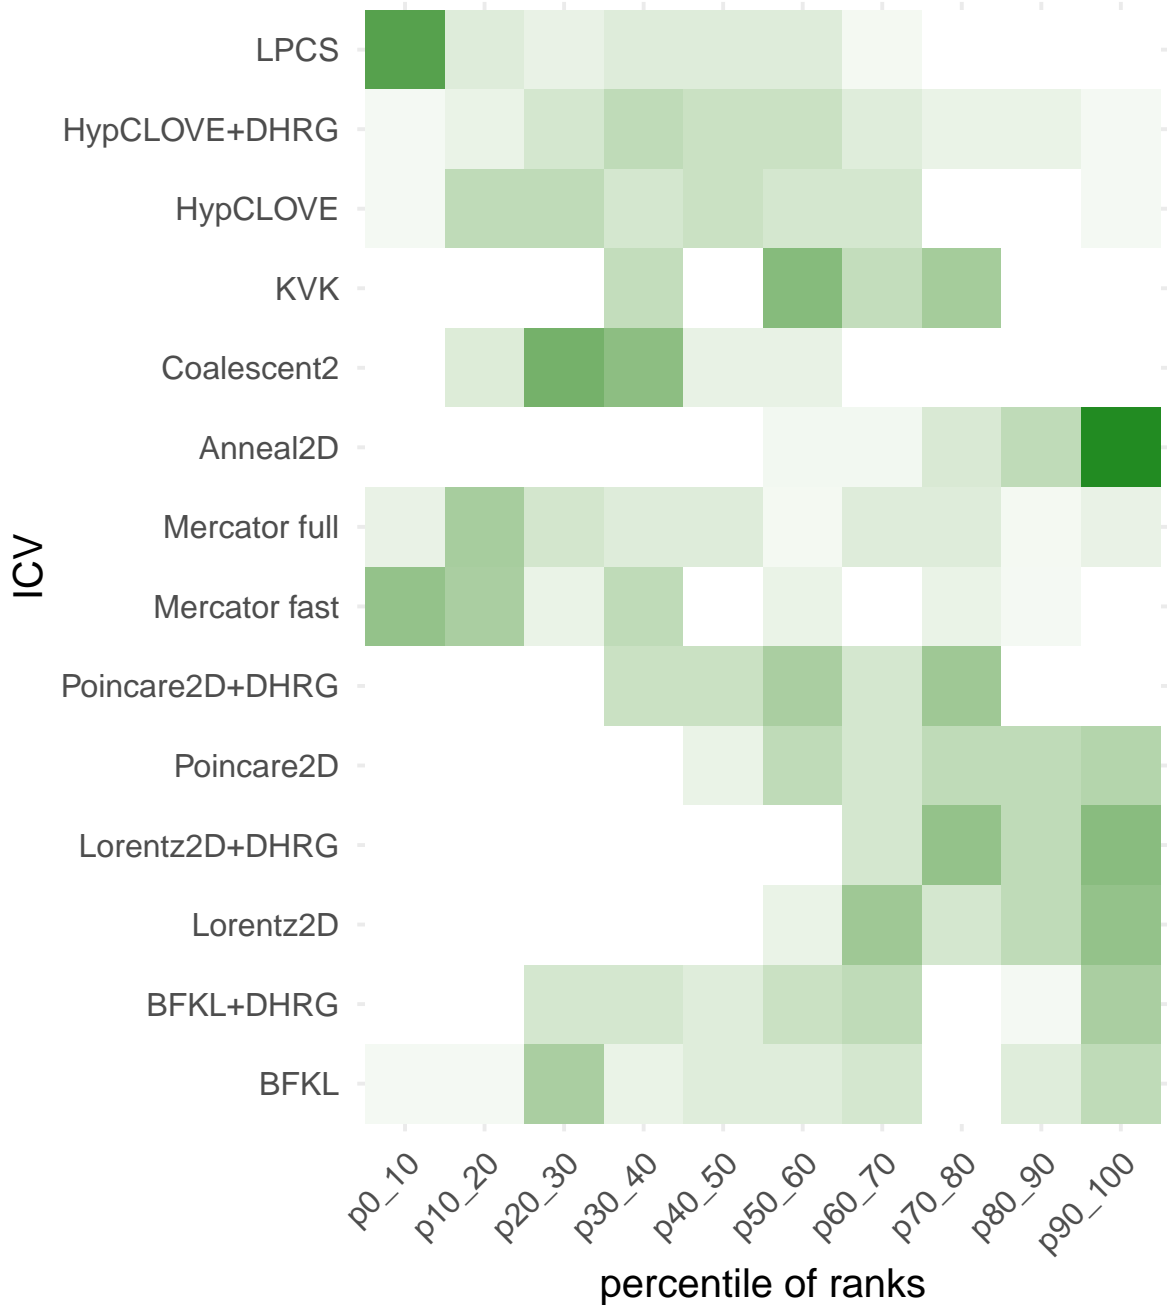

Supplement: supplementary_material [file real-world_aggregate_control.pdf › bridging/tables/real-world_aggregate_control.pdf]

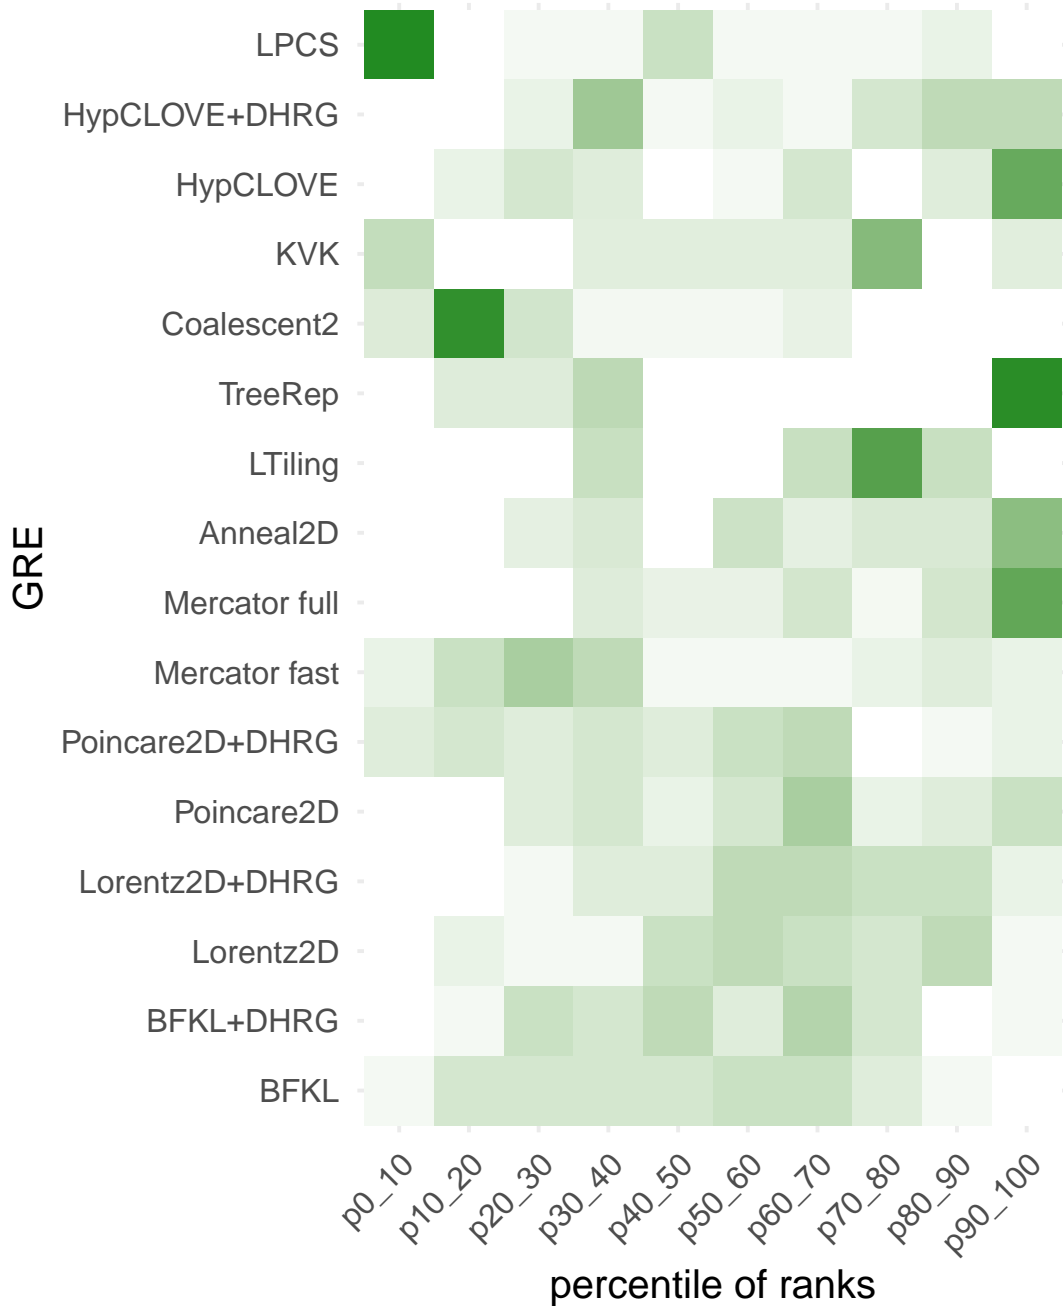

Supplement: supplementary_material [file real-world_aggregate_gre.pdf › bridging/tables/real-world_aggregate_gre.pdf]

MAP

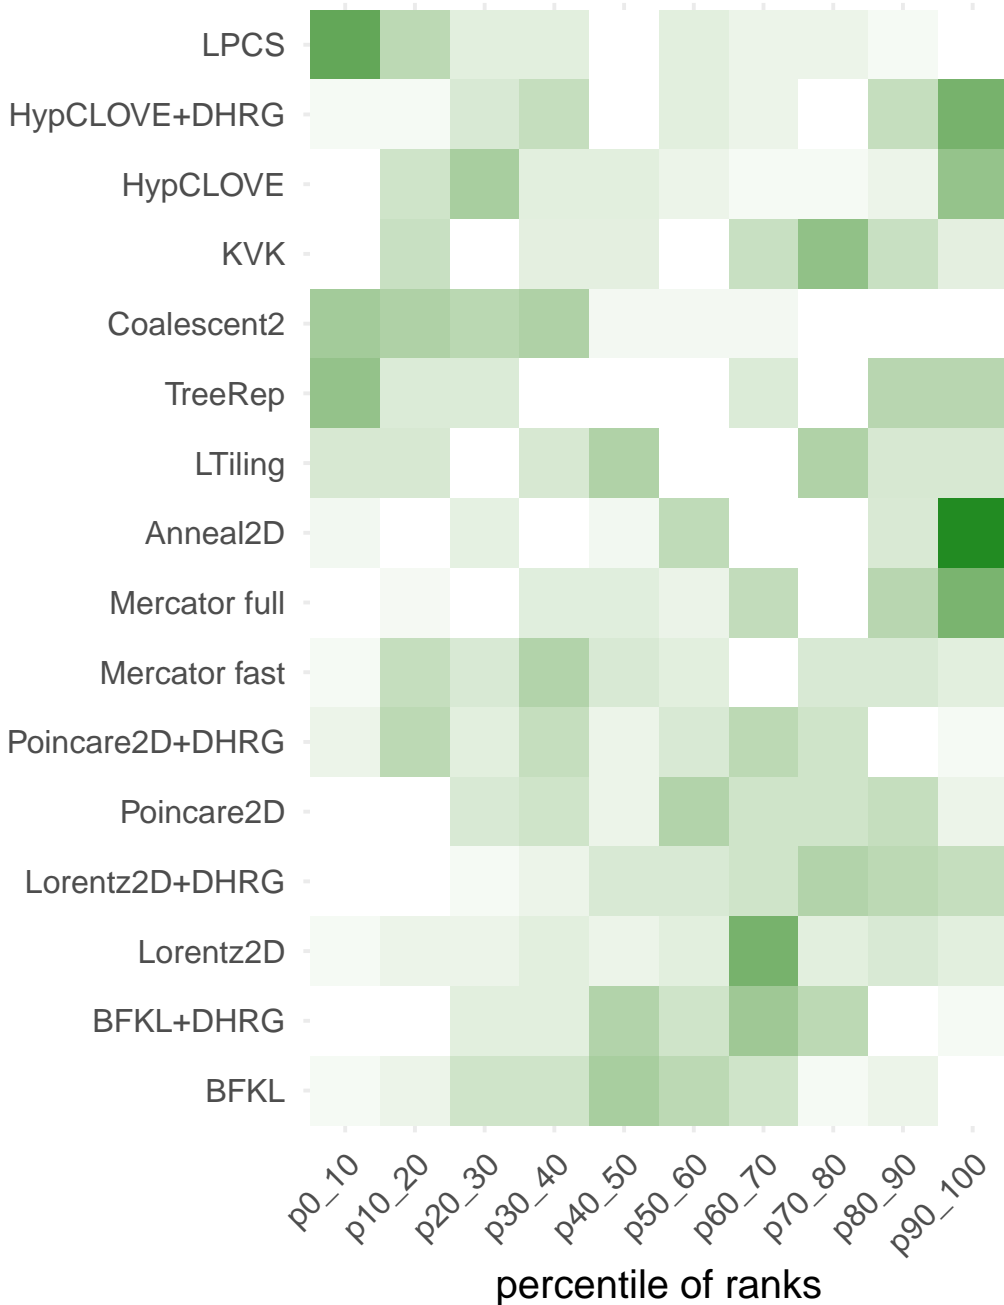

Supplement: supplementary_material [file real-world_aggregate_map.pdf › bridging/tables/real-world_aggregate_map.pdf]

MR

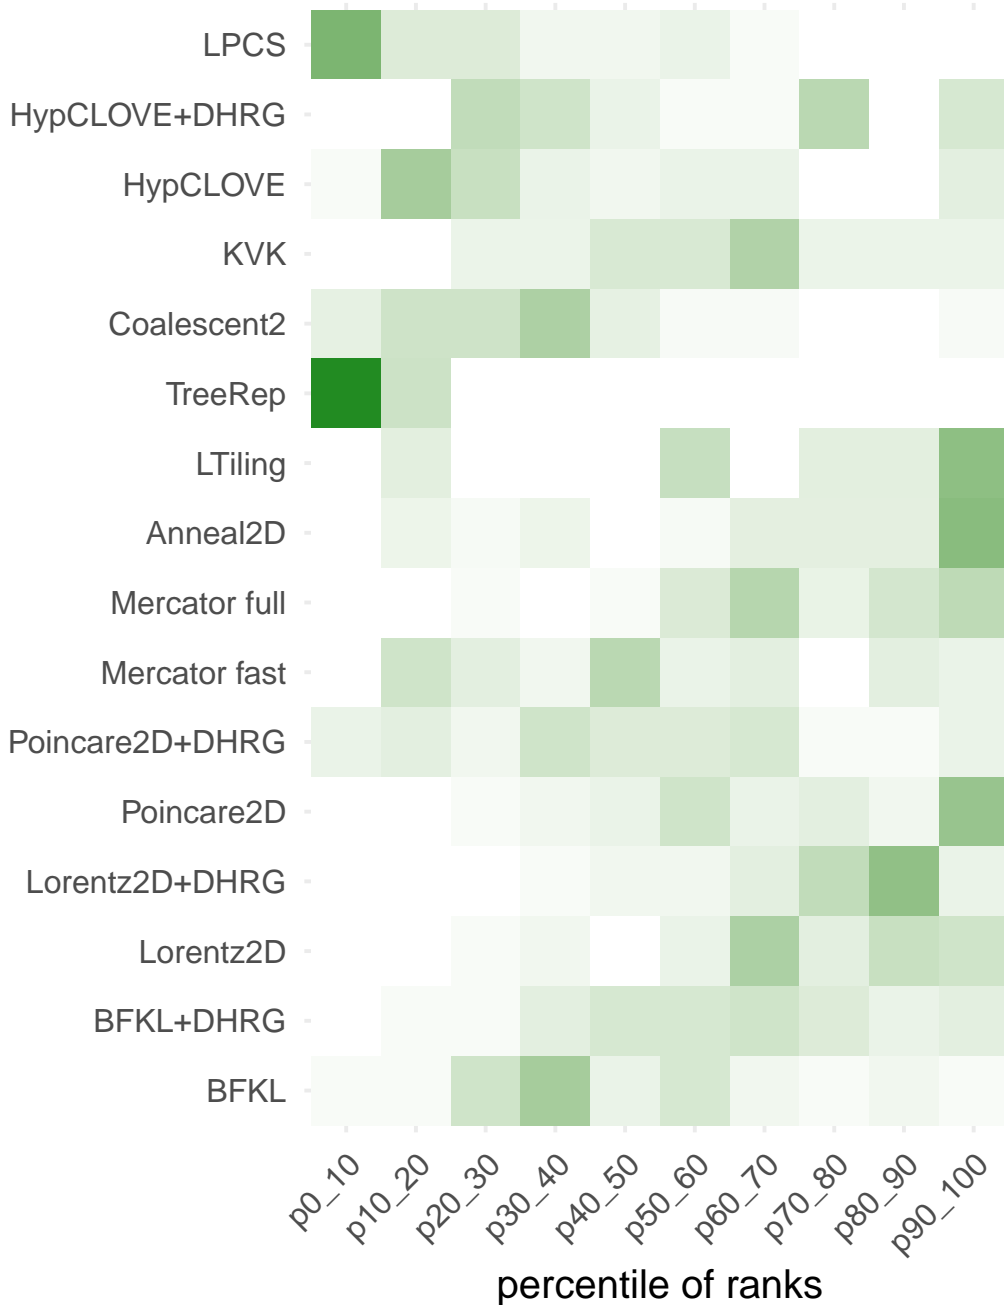

Supplement: supplementary_material [file real-world_aggregate_mr.pdf › bridging/tables/real-world_aggregate_mr.pdf]

GSE

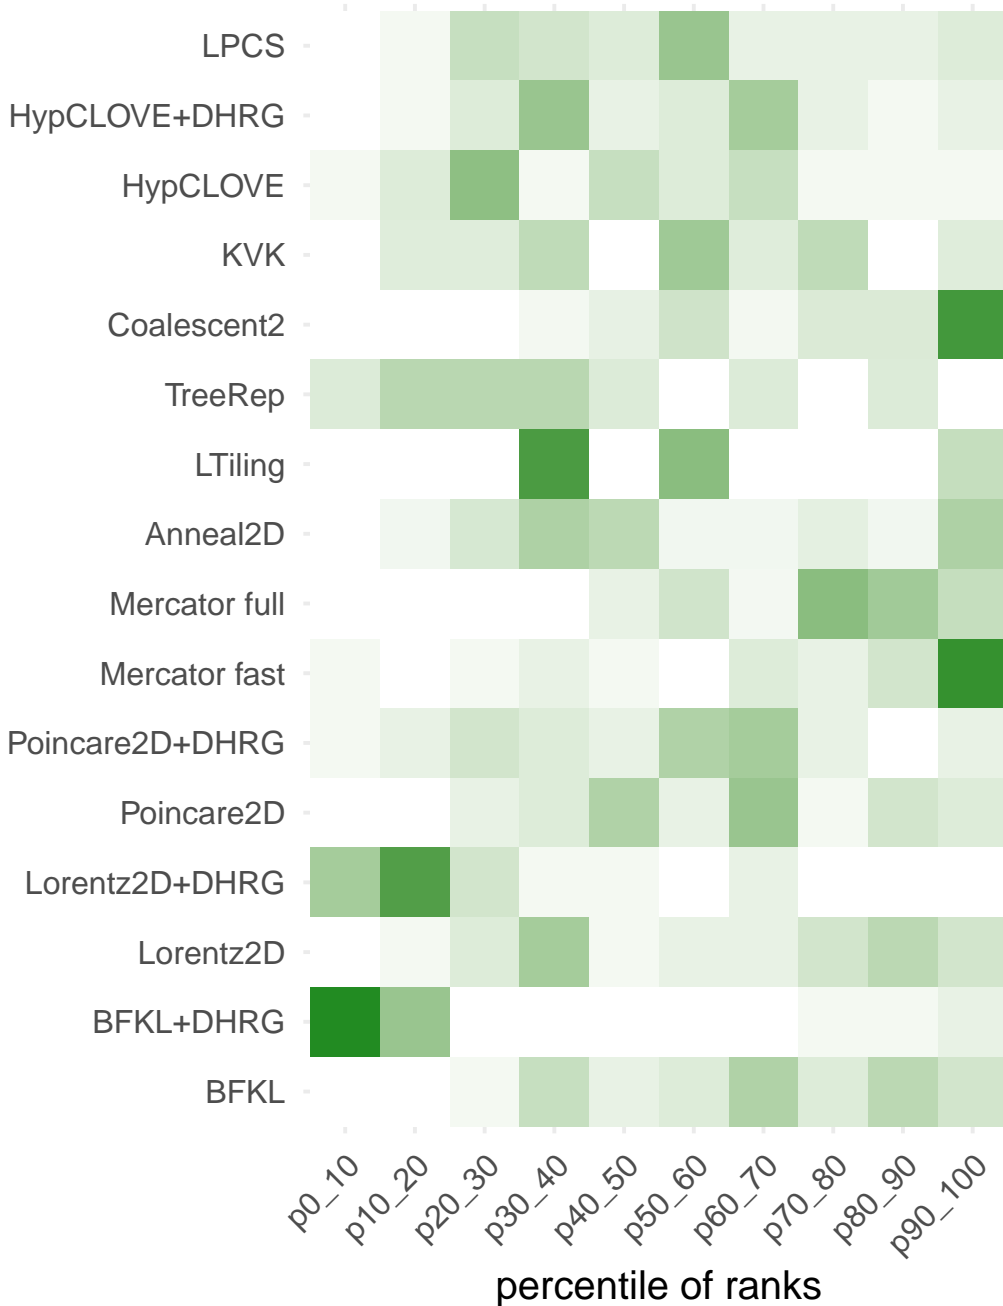

Supplement: supplementary_material [file real-world_aggregate_stretch.pdf › bridging/tables/real-world_aggregate_stretch.pdf]

GSR

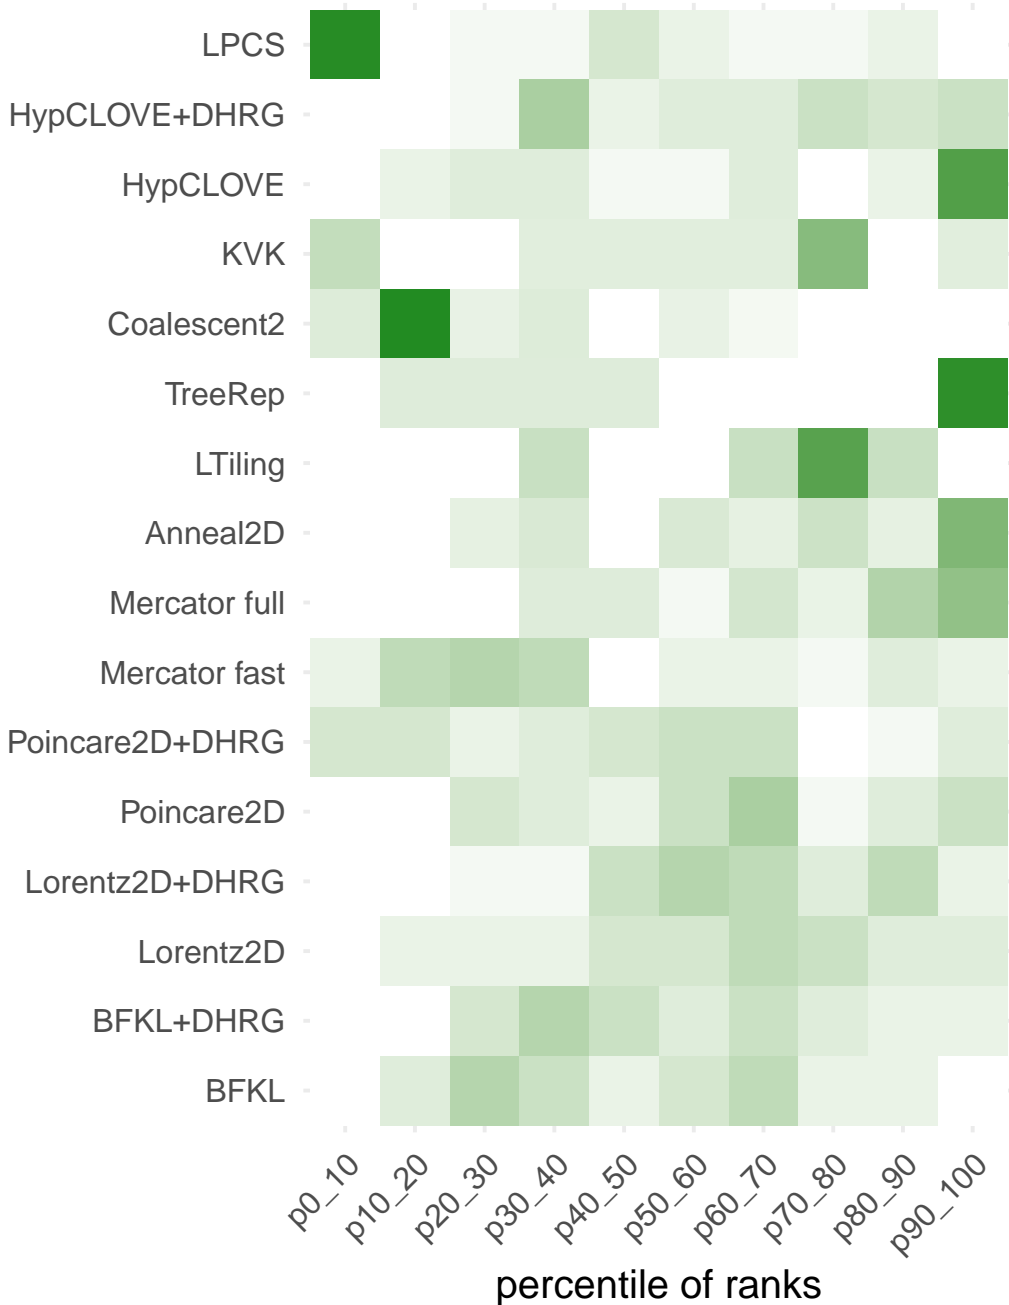

Supplement: supplementary_material [file real-world_aggregate_success.pdf › bridging/tables/real-world_aggregate_success.pdf]

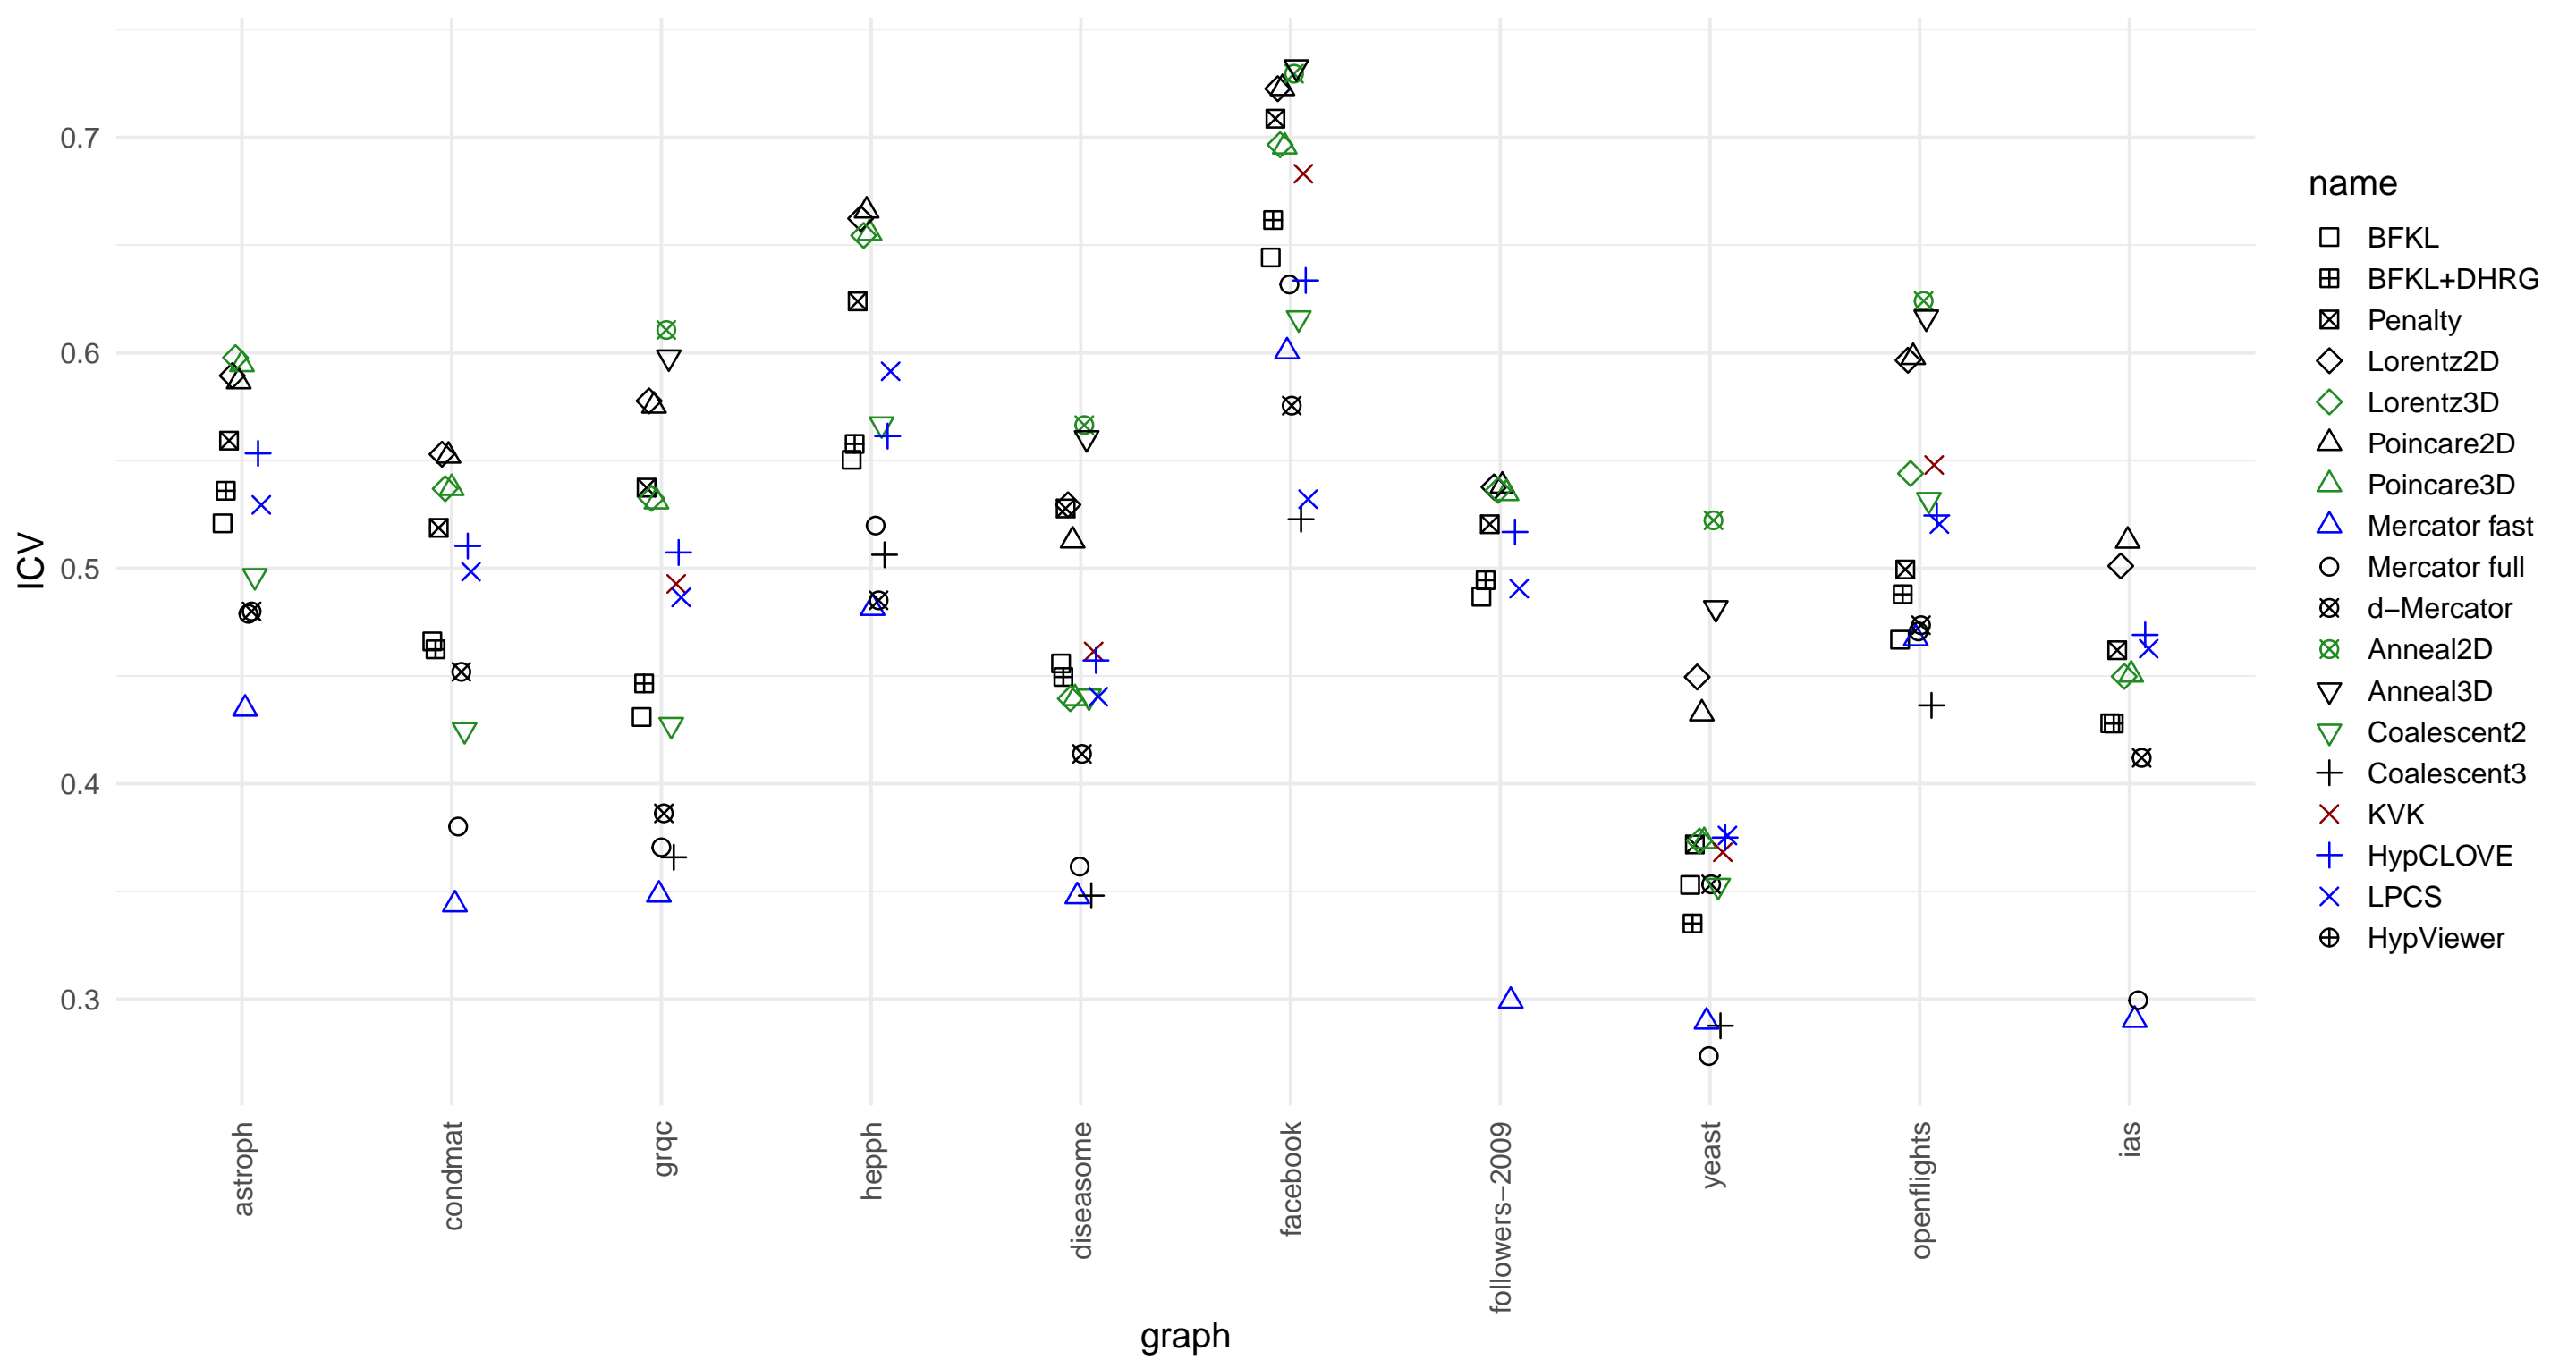

Supplement: supplementary_material [file real-world_control.pdf › bridging/tables/real-world_control.pdf]

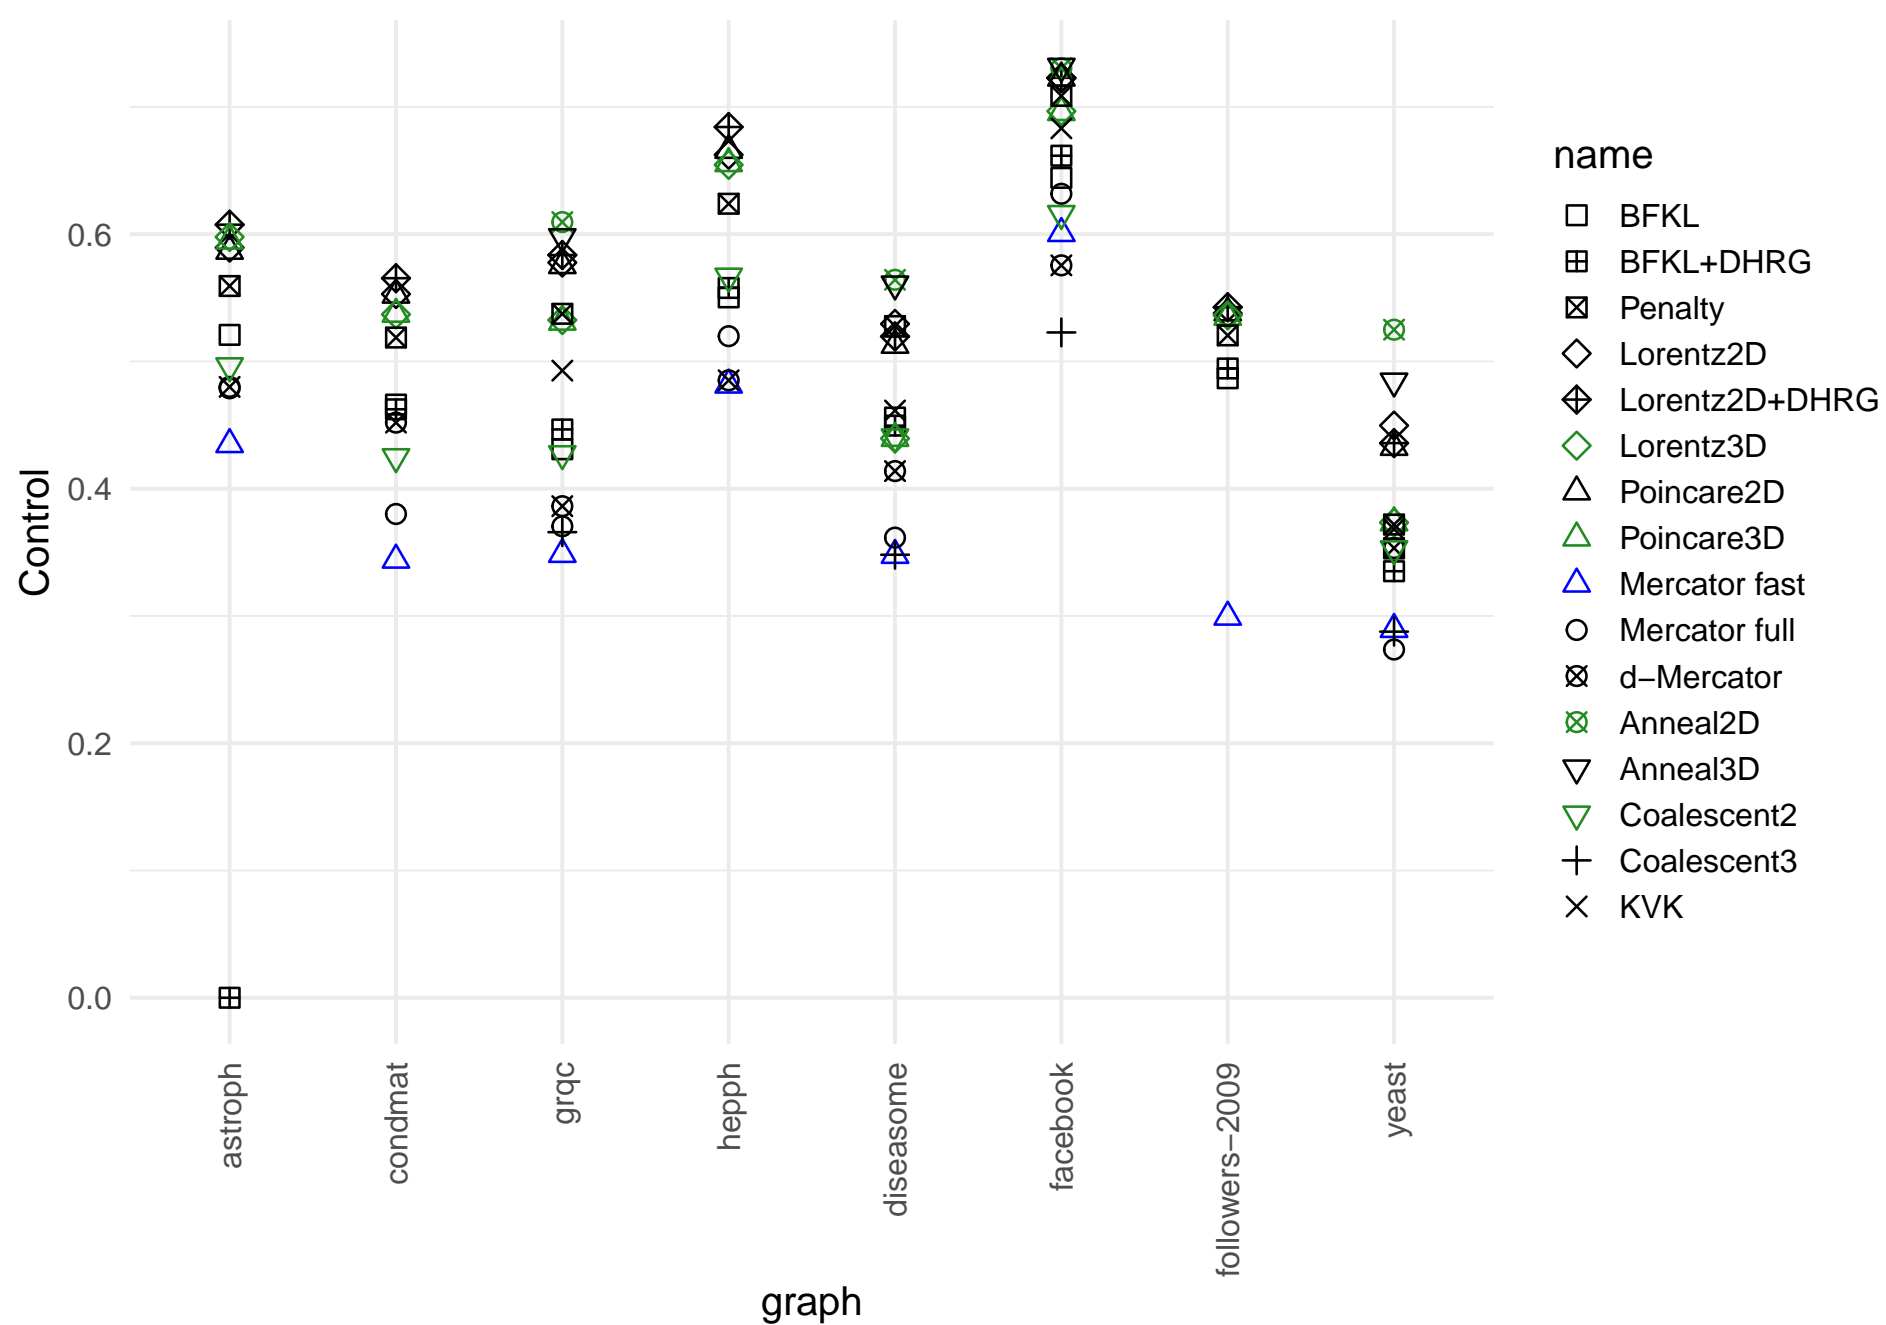

Supplement: supplementary_material [file real-world_control.pdf › bridging/tables/real-world_control.pdf]

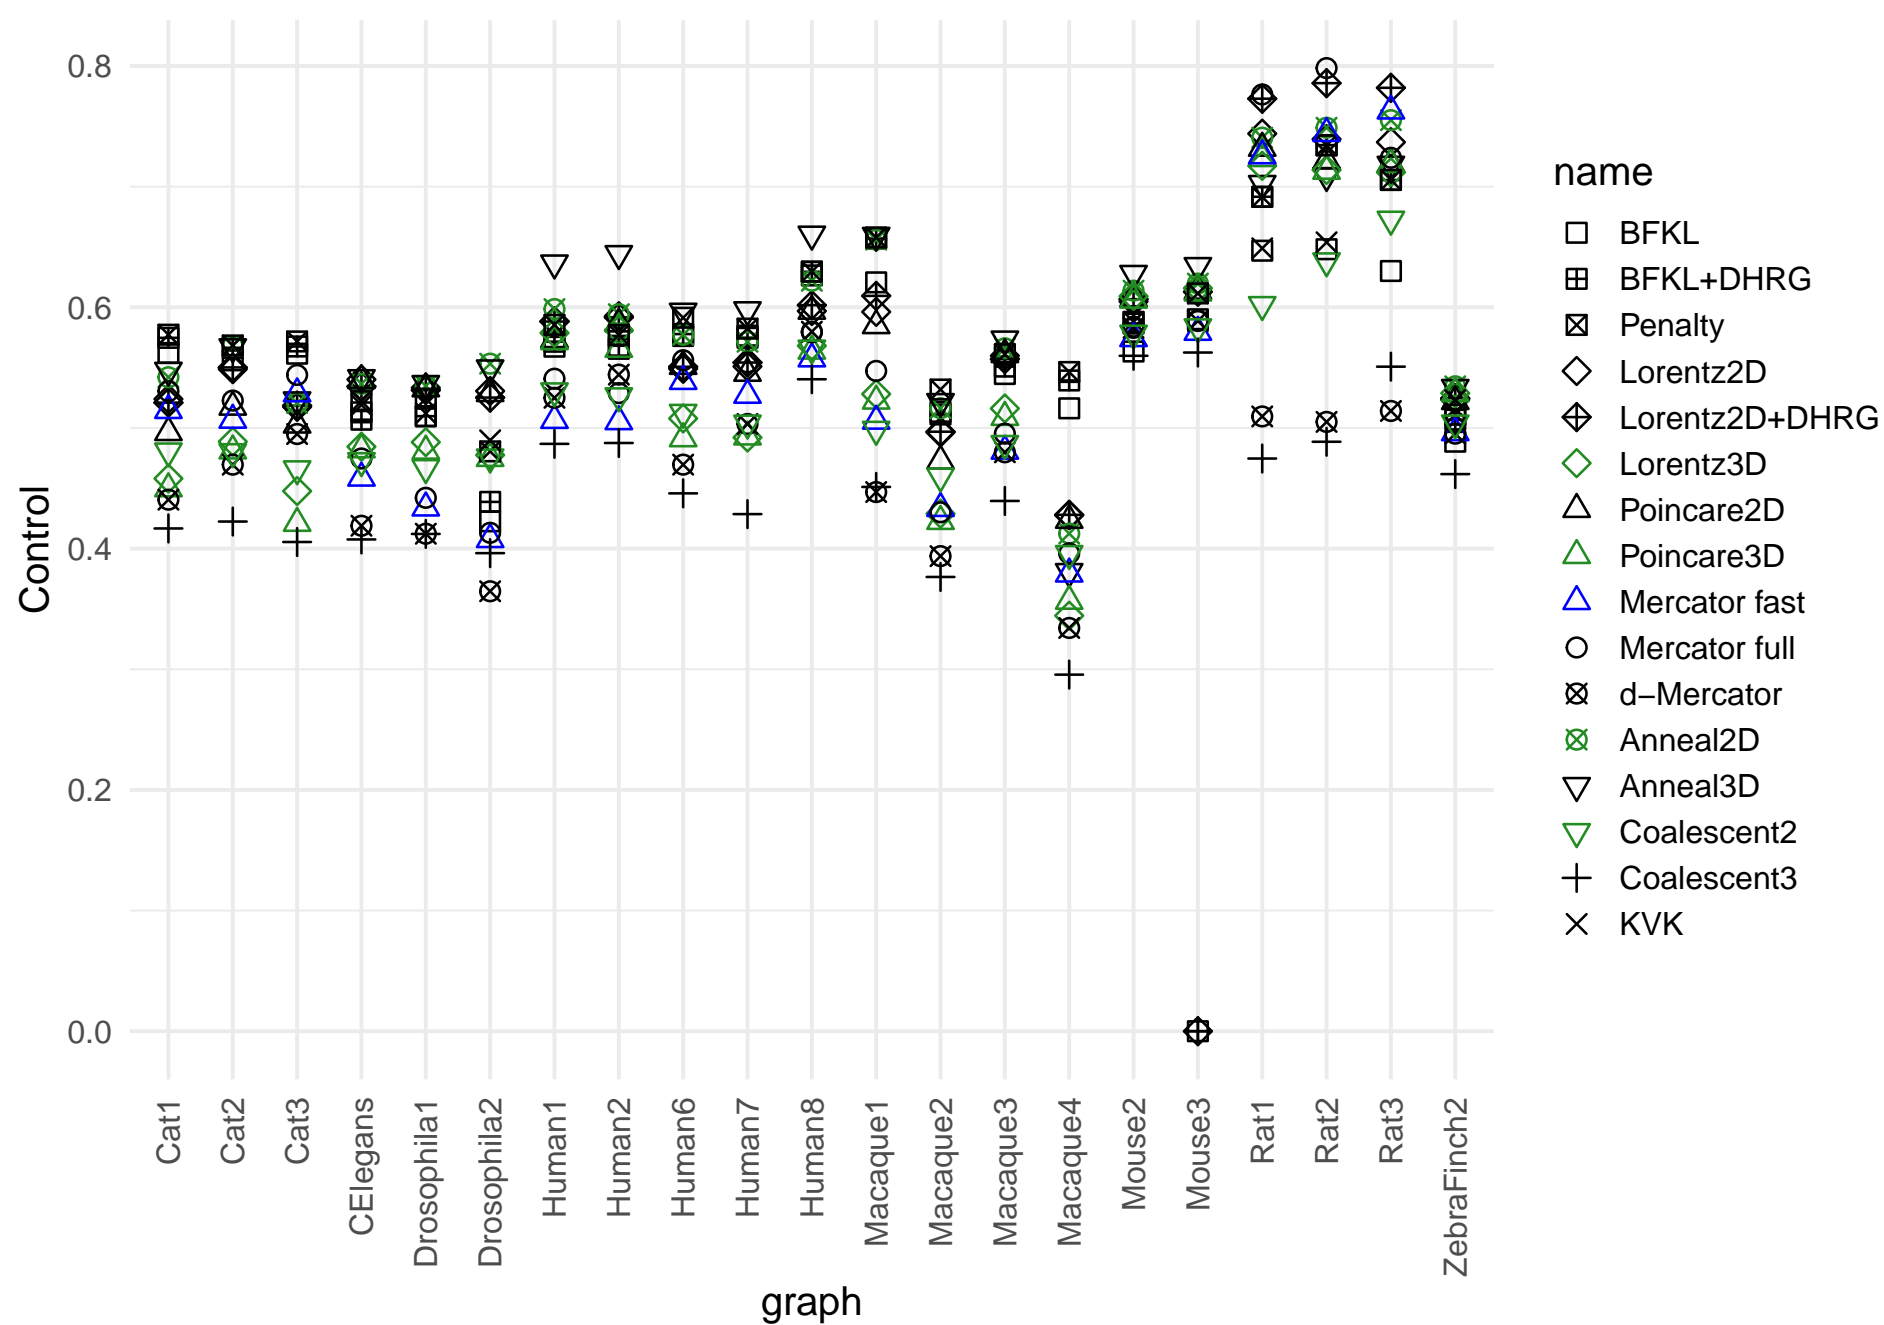

Supplement: supplementary_material [file real-world_control_conn.pdf › bridging/tables/real-world_control_conn.pdf]

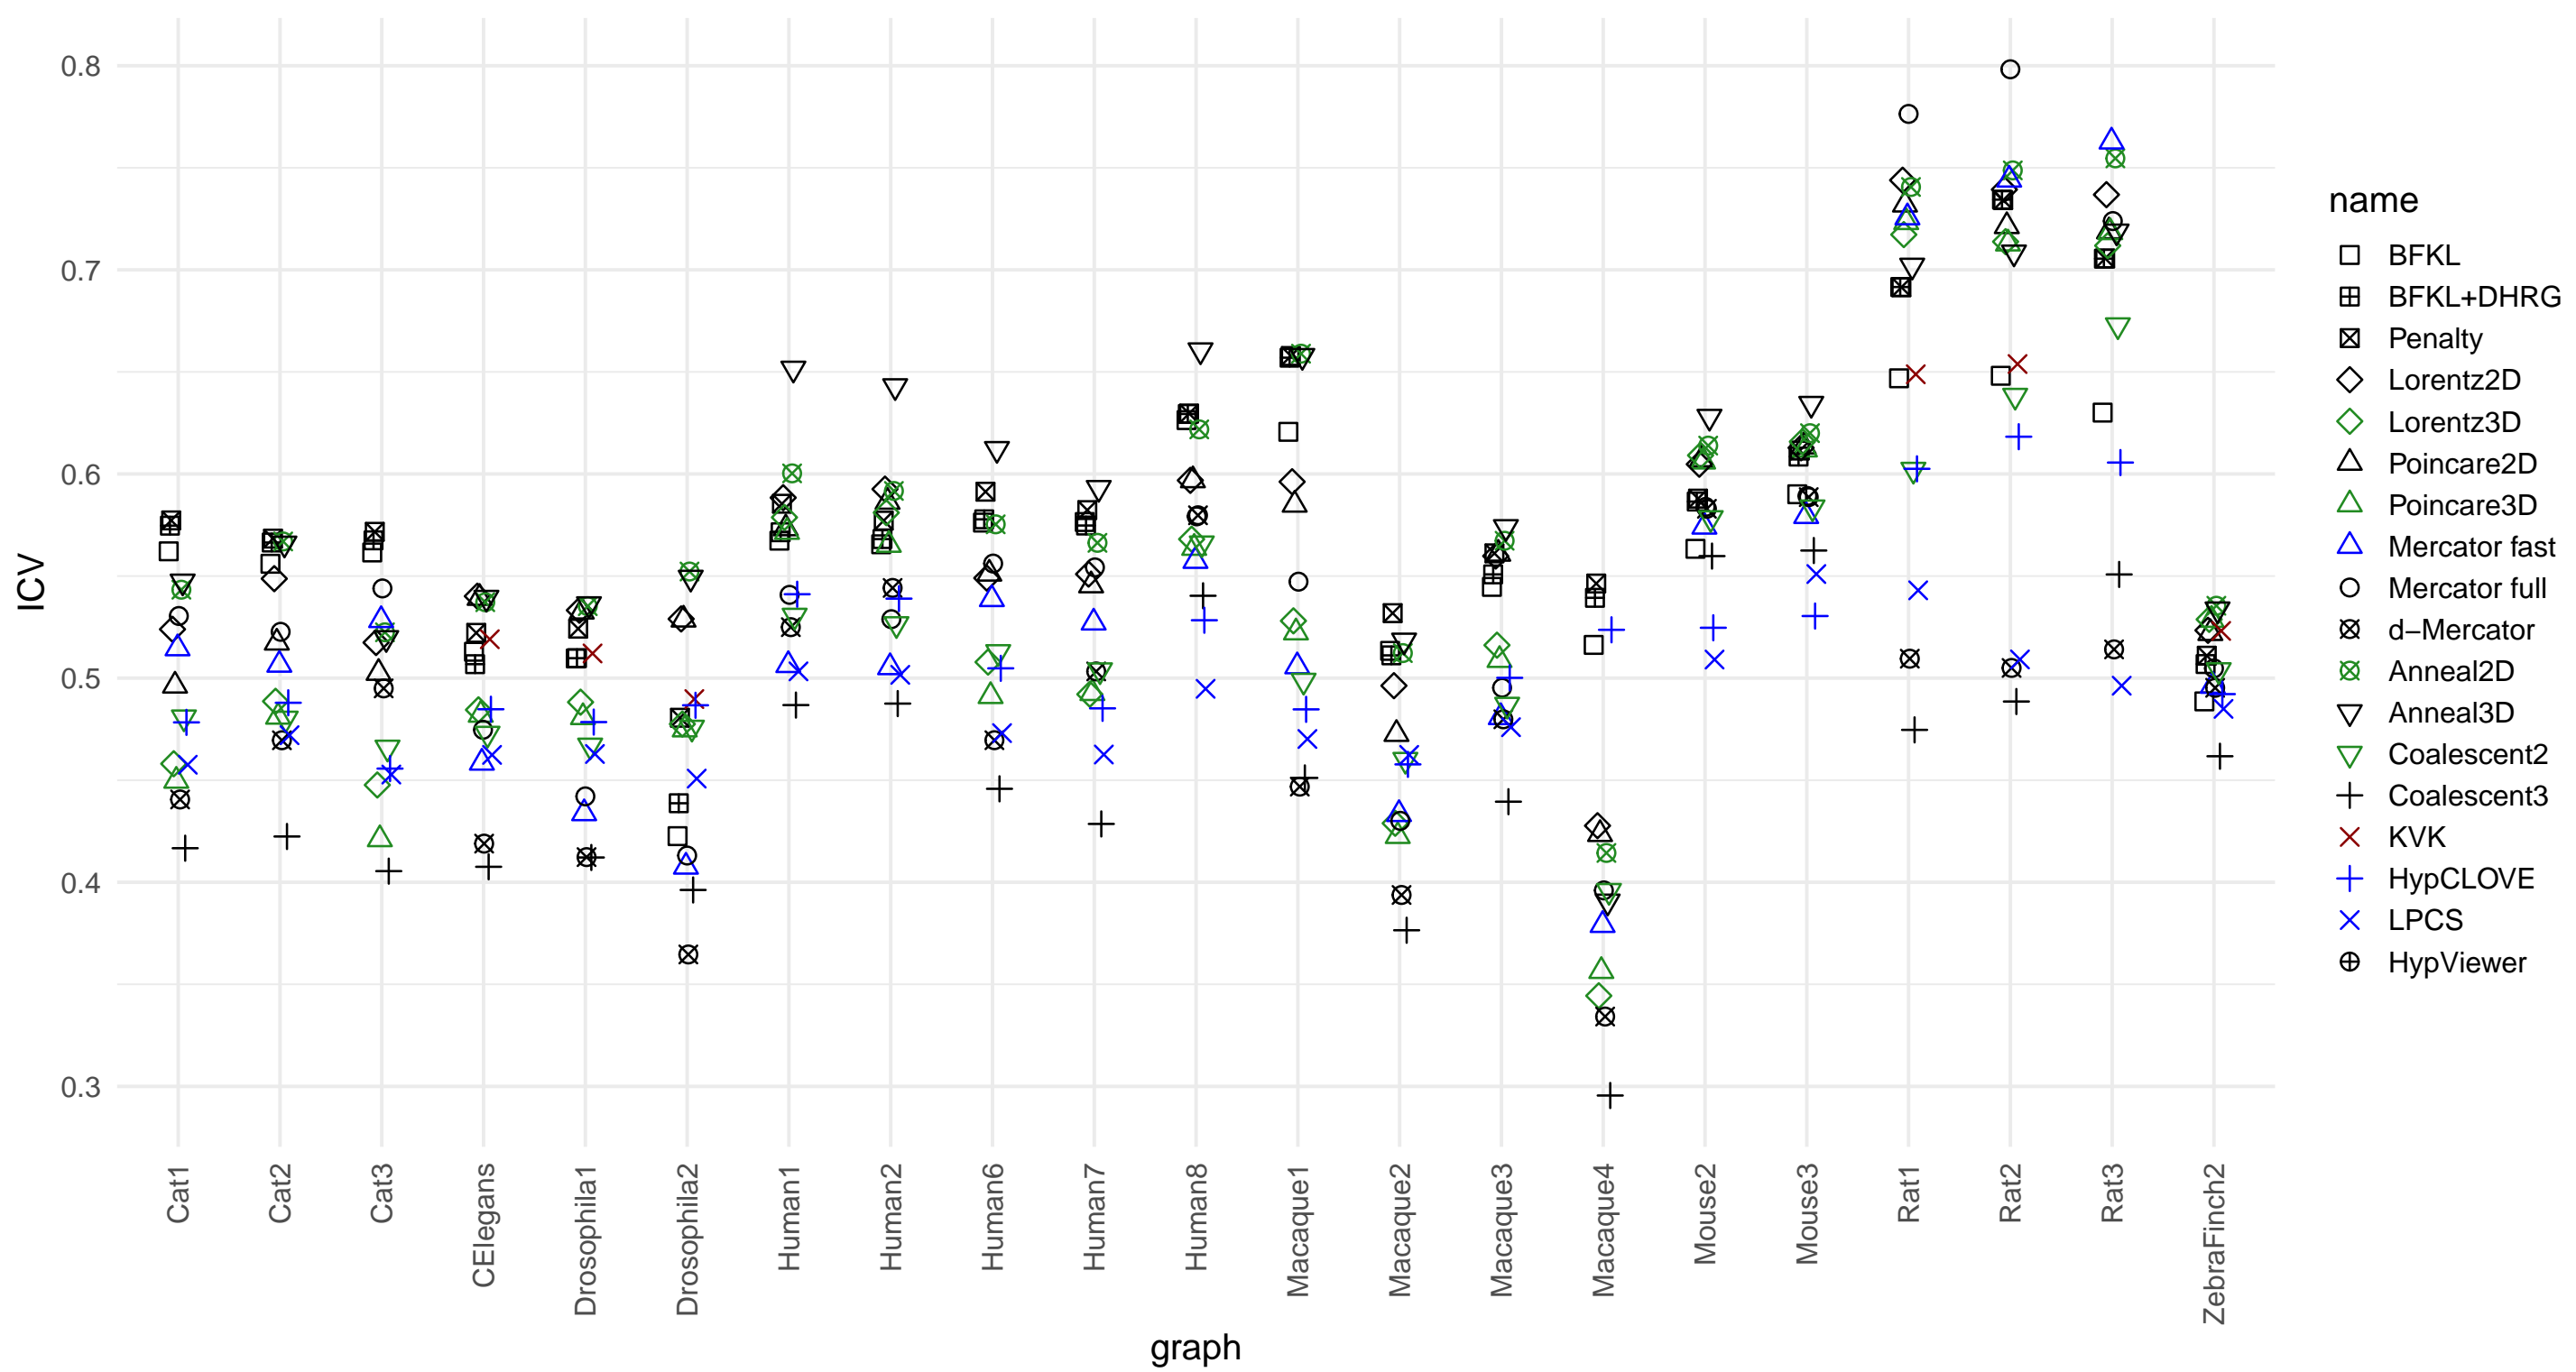

Supplement: supplementary_material [file real-world_control_conn.pdf › bridging/tables/real-world_control_conn.pdf]

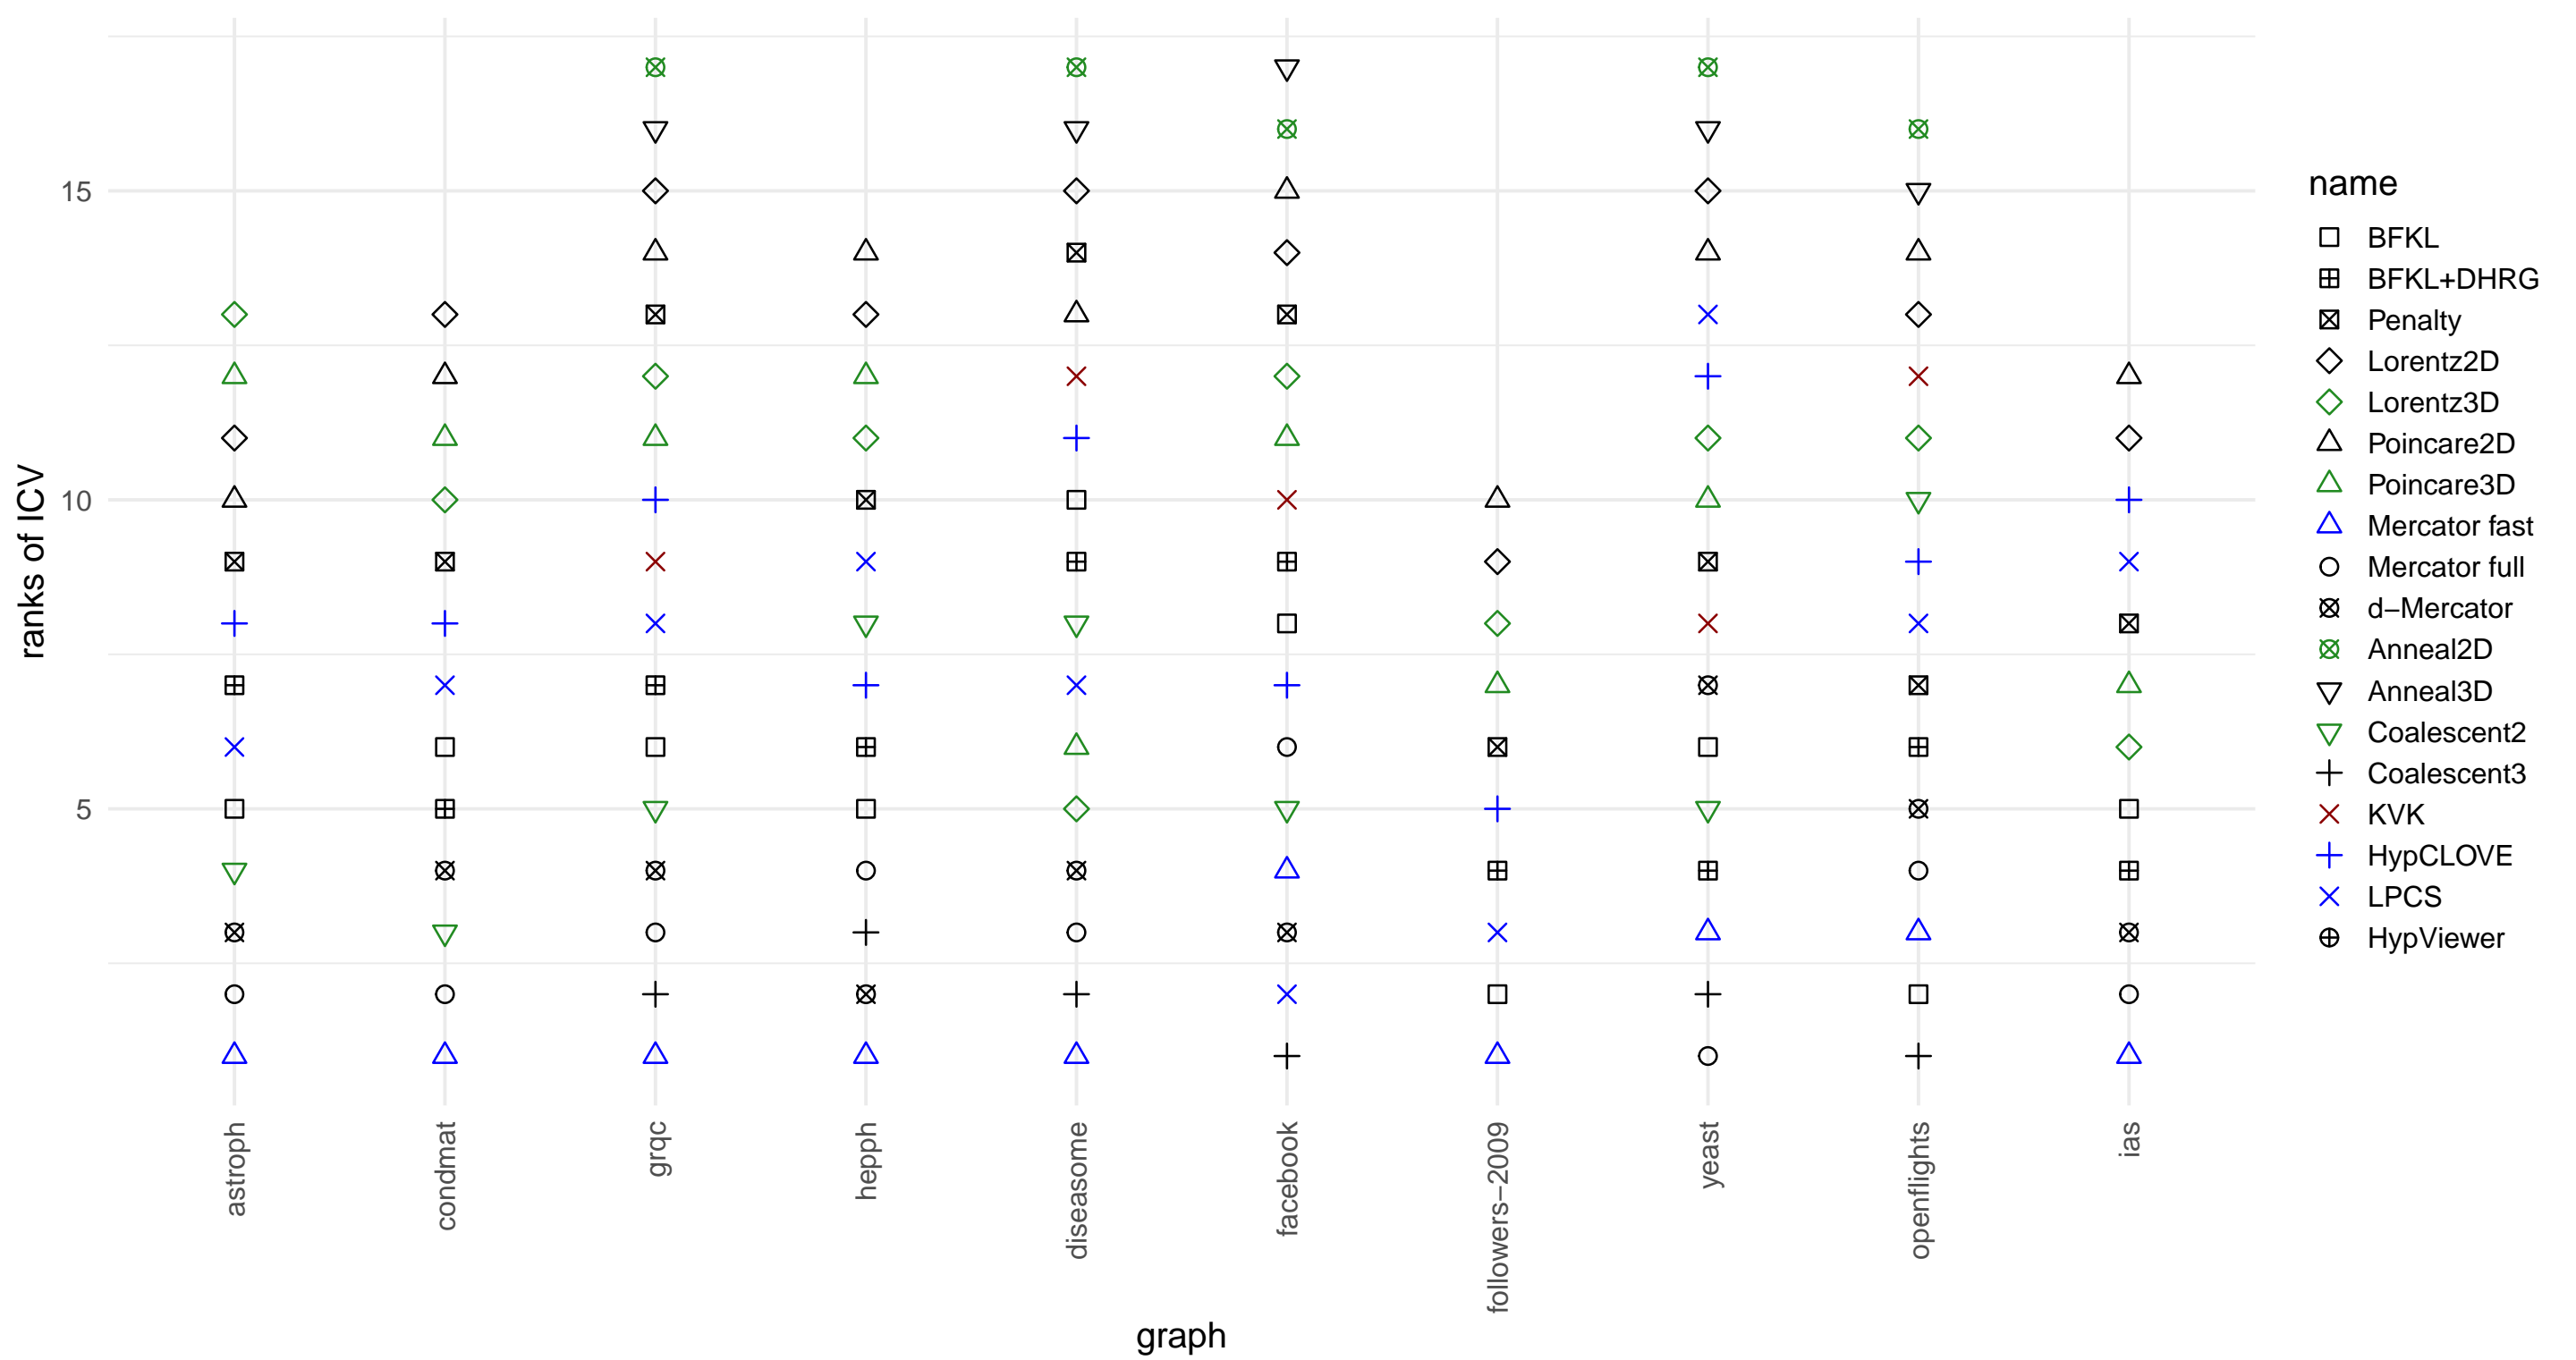

Supplement: supplementary_material [file real-world_control_ranking.pdf › bridging/tables/real-world_control_ranking.pdf]

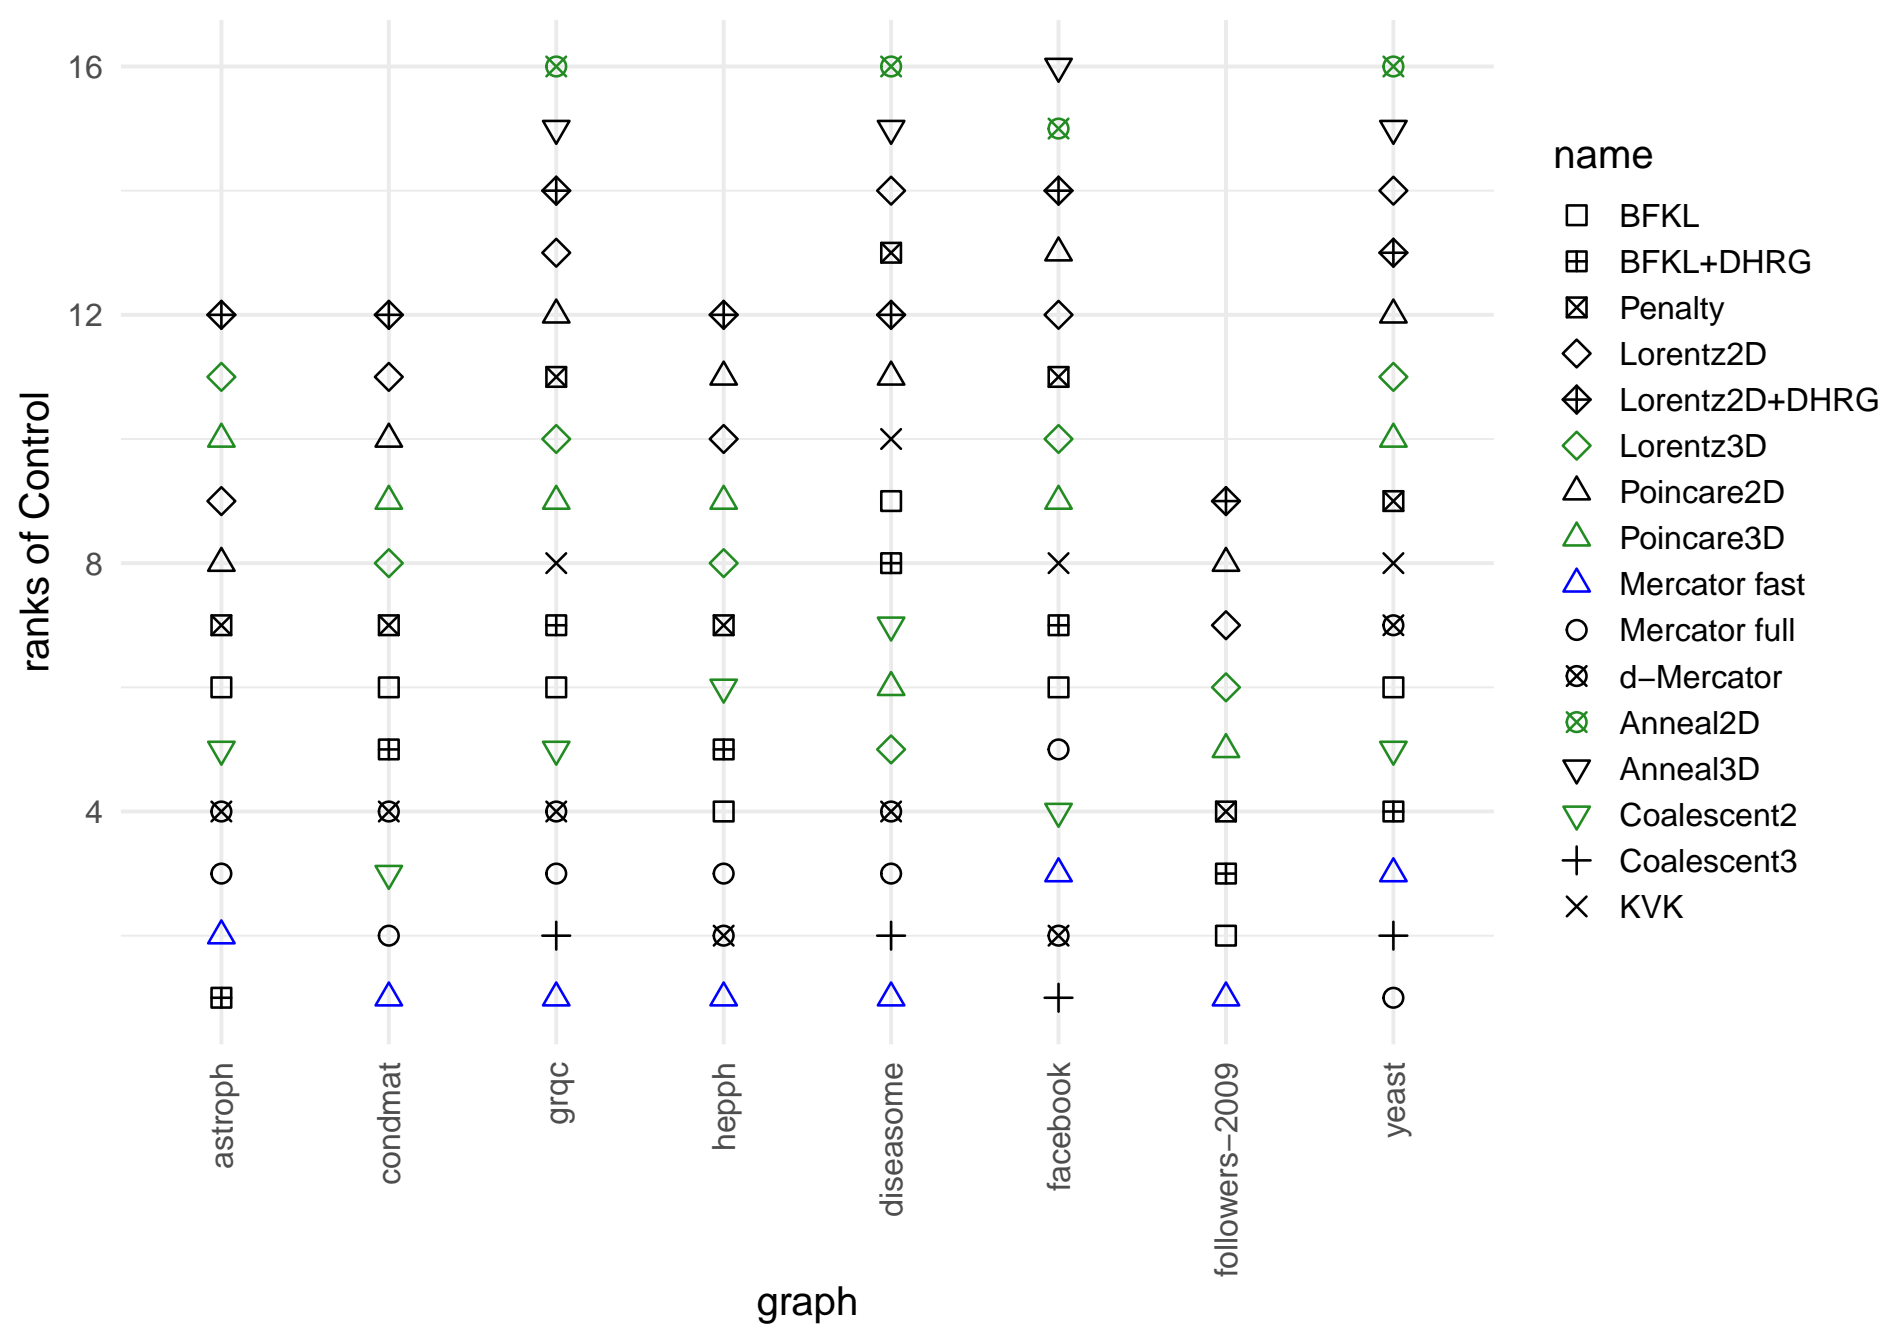

Supplement: supplementary_material [file real-world_control_ranking.pdf › bridging/tables/real-world_control_ranking.pdf]

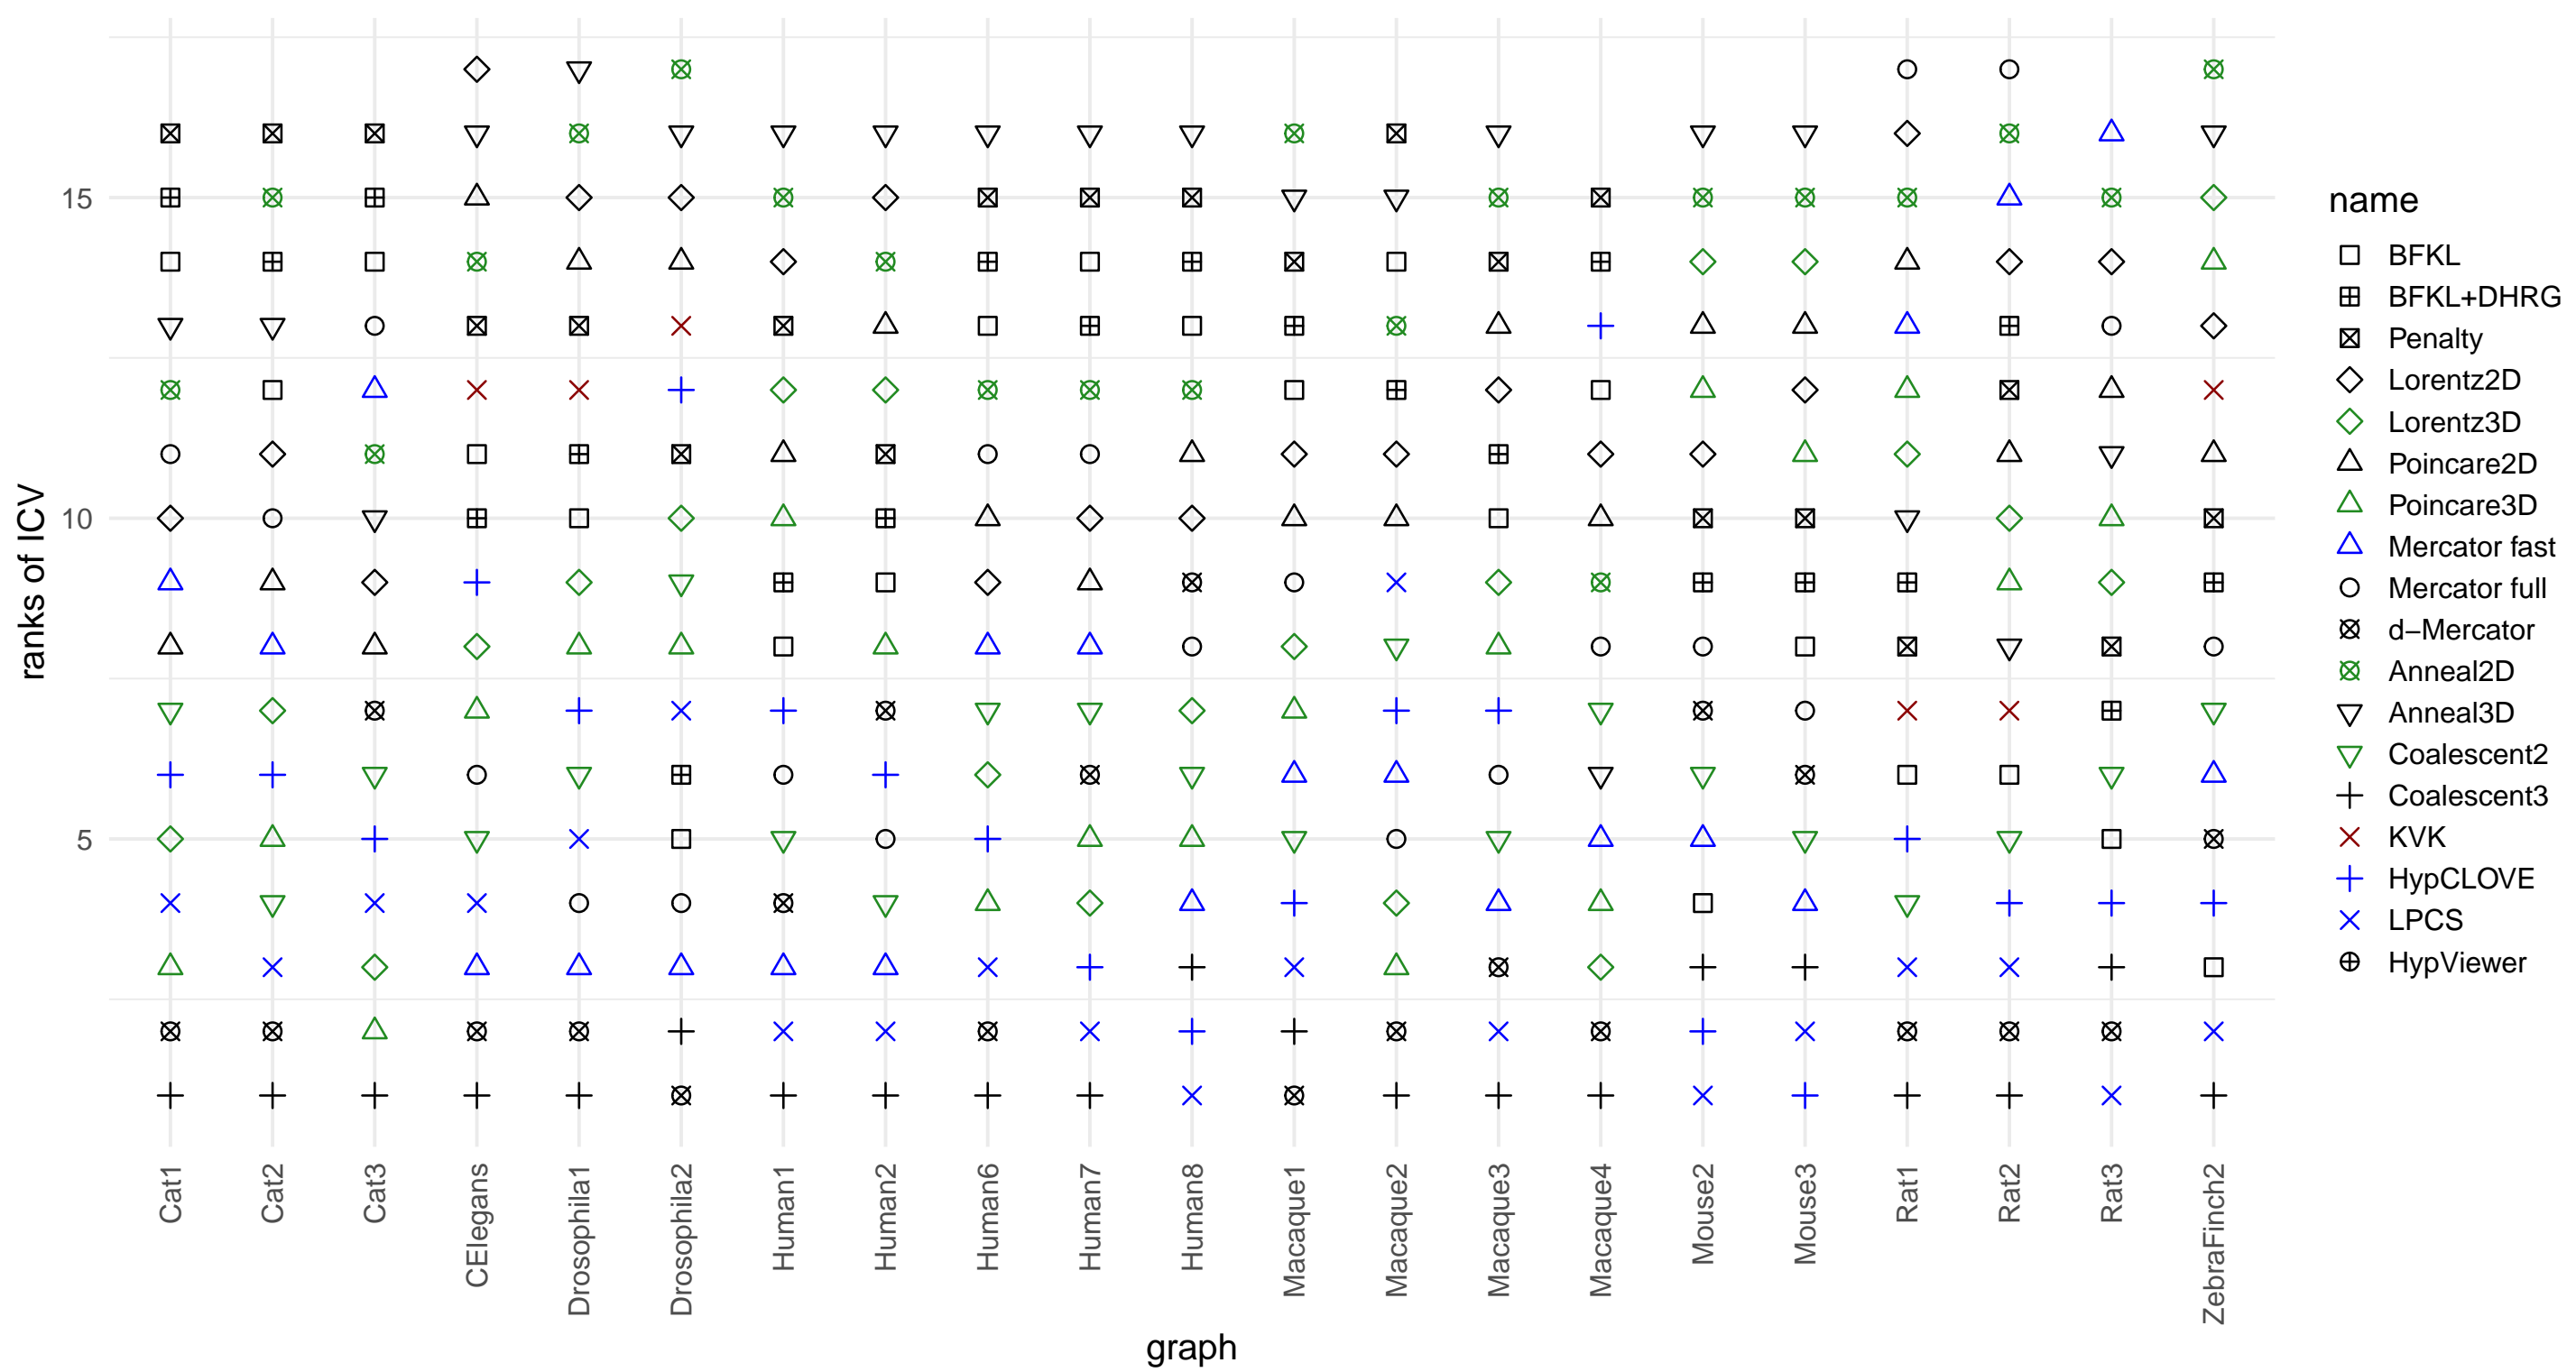

Supplement: supplementary_material [file real-world_control_ranking_conn.pdf › bridging/tables/real-world_control_ranking_conn.pdf]

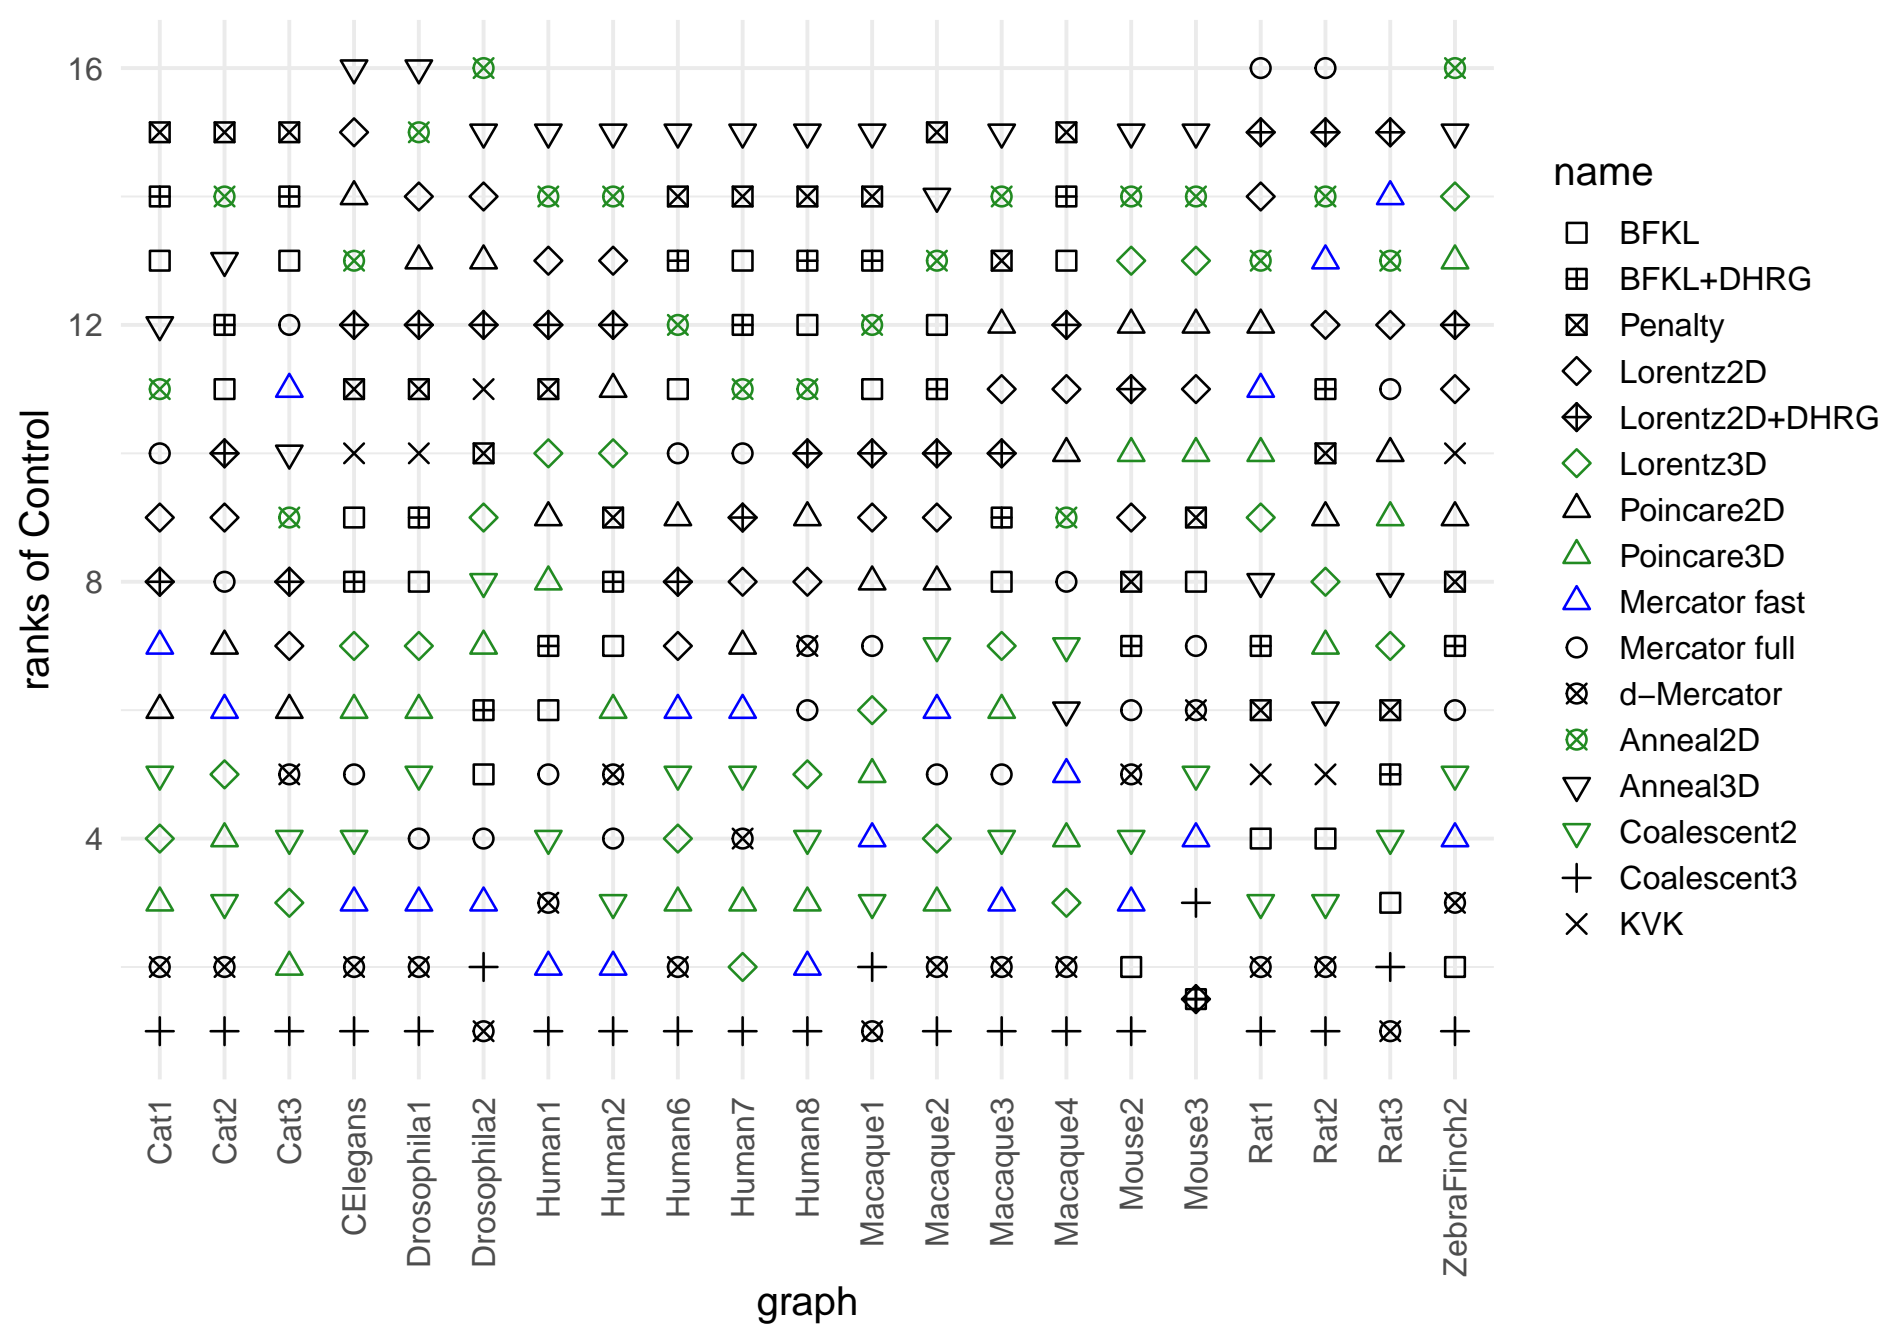

Supplement: supplementary_material [file real-world_control_ranking_conn.pdf › bridging/tables/real-world_control_ranking_conn.pdf]

Greedy Routing Efficiency

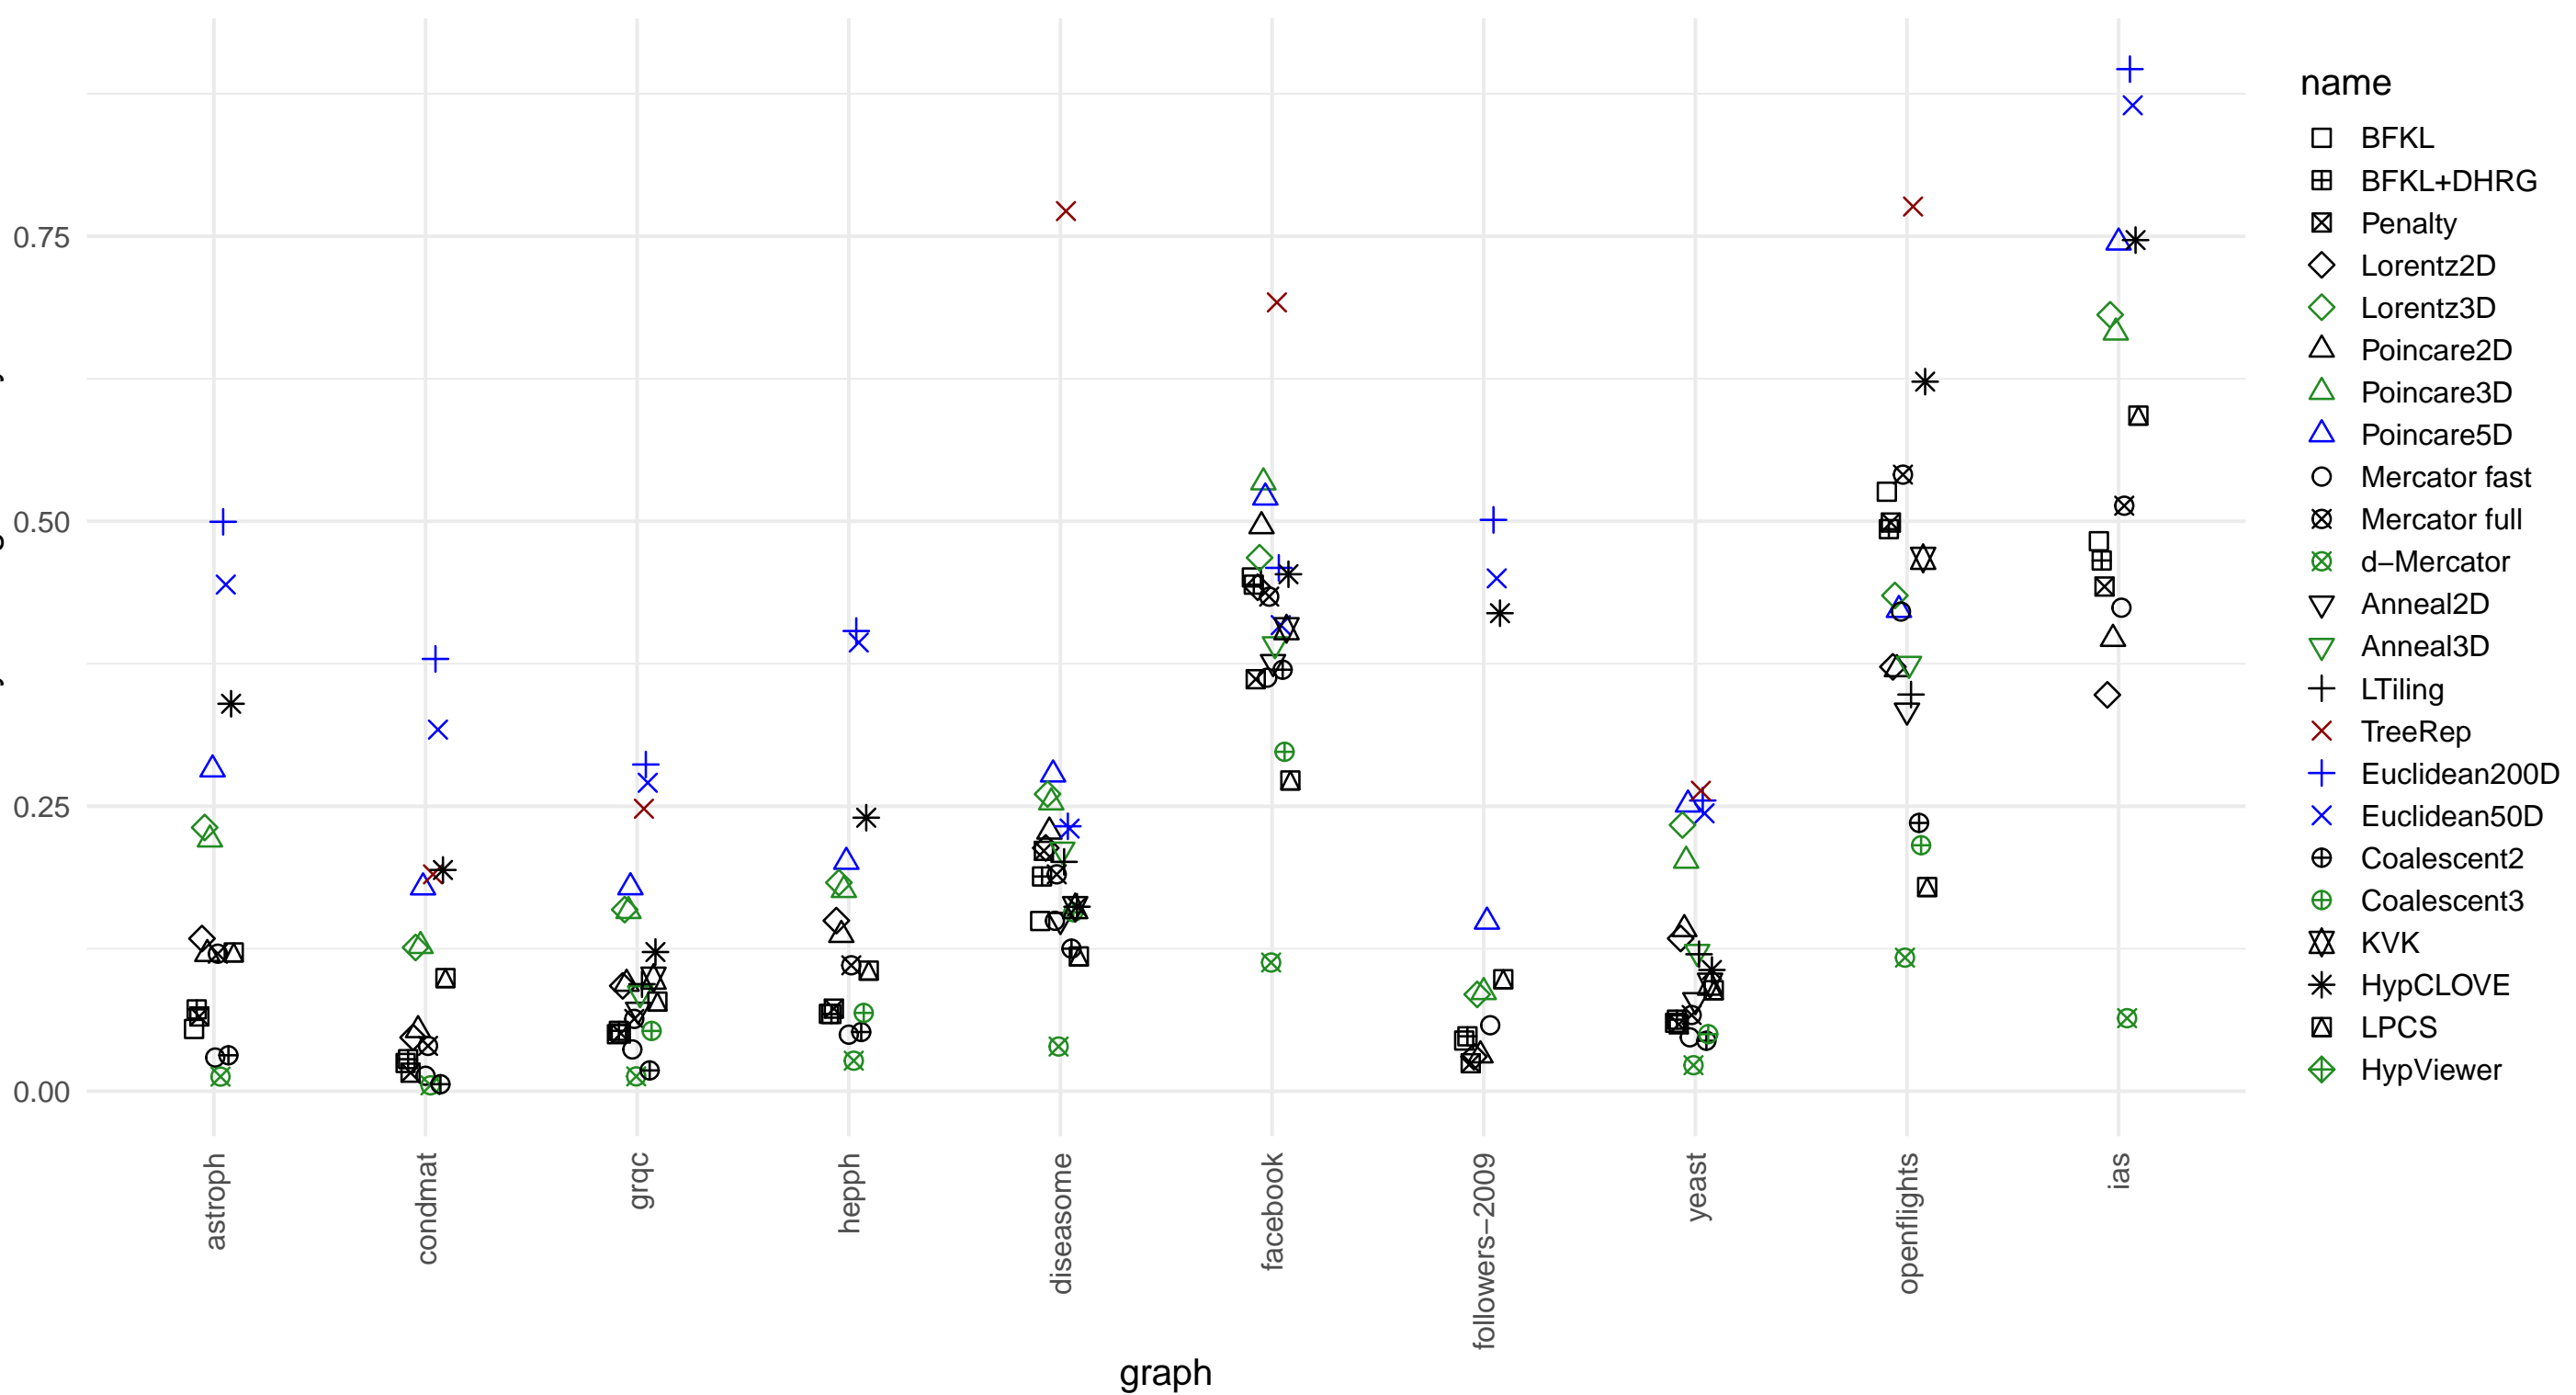

Supplement: supplementary_material [file real-world_gre.pdf › bridging/tables/real-world_gre.pdf]

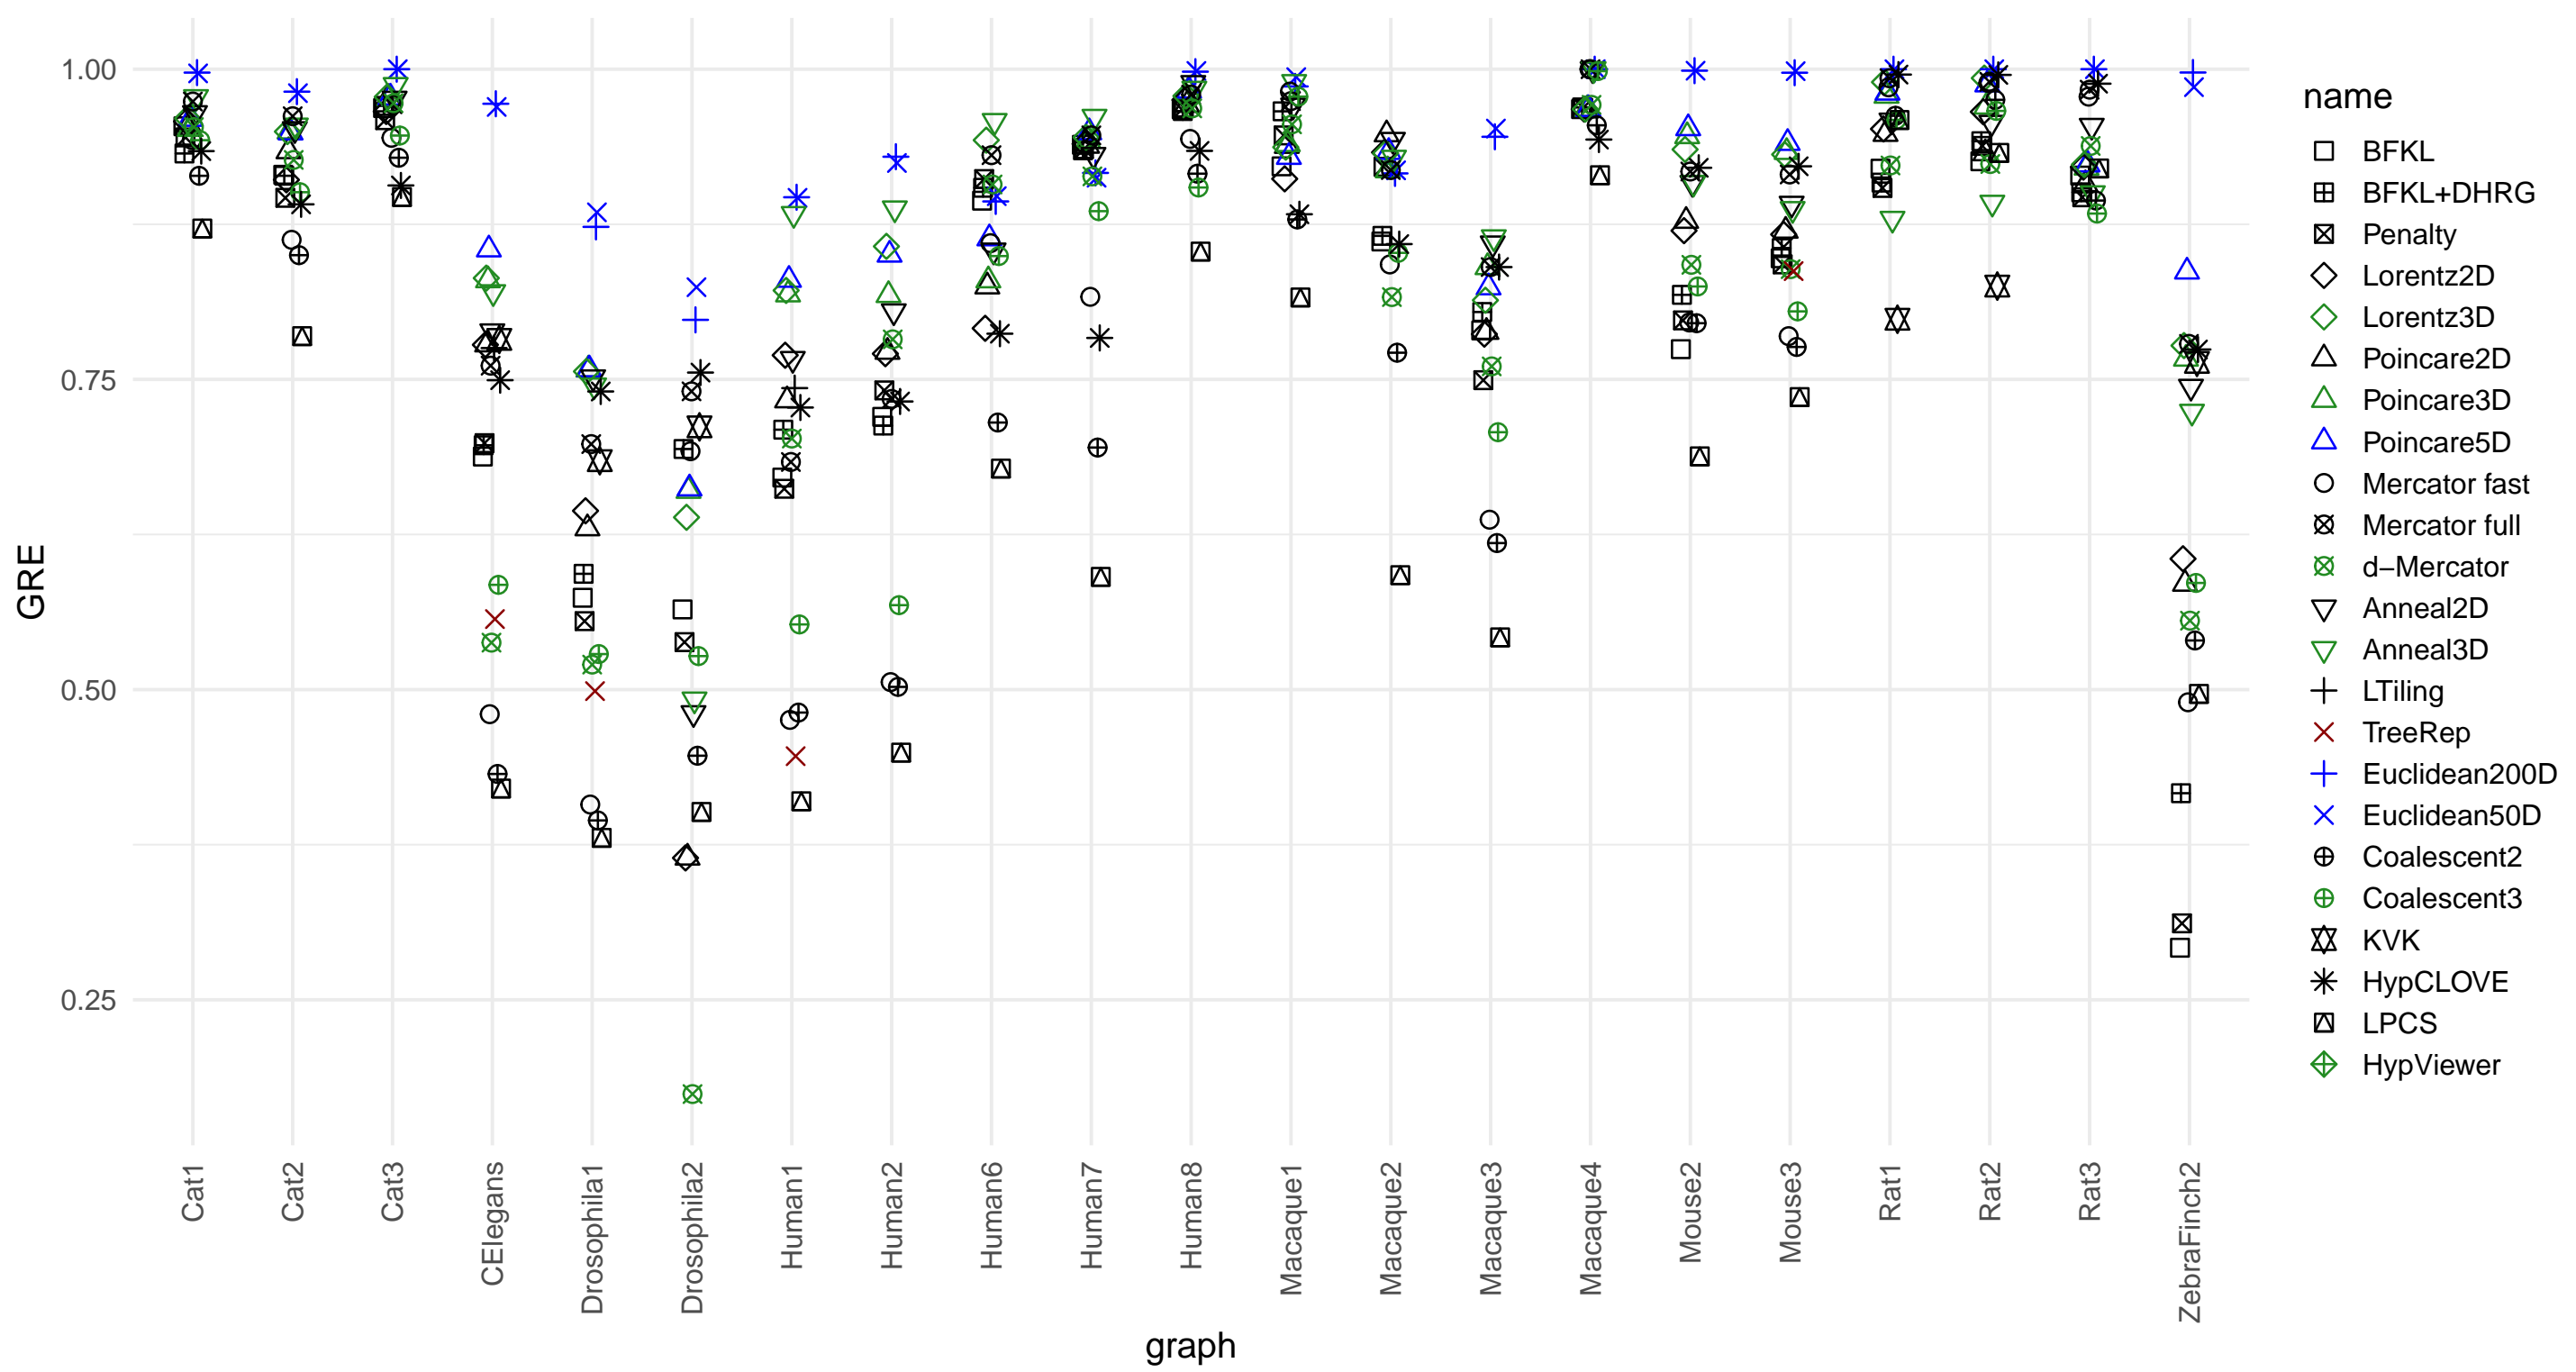

Supplement: supplementary_material [file real-world_gre_conn.pdf › bridging/tables/real-world_gre_conn.pdf]

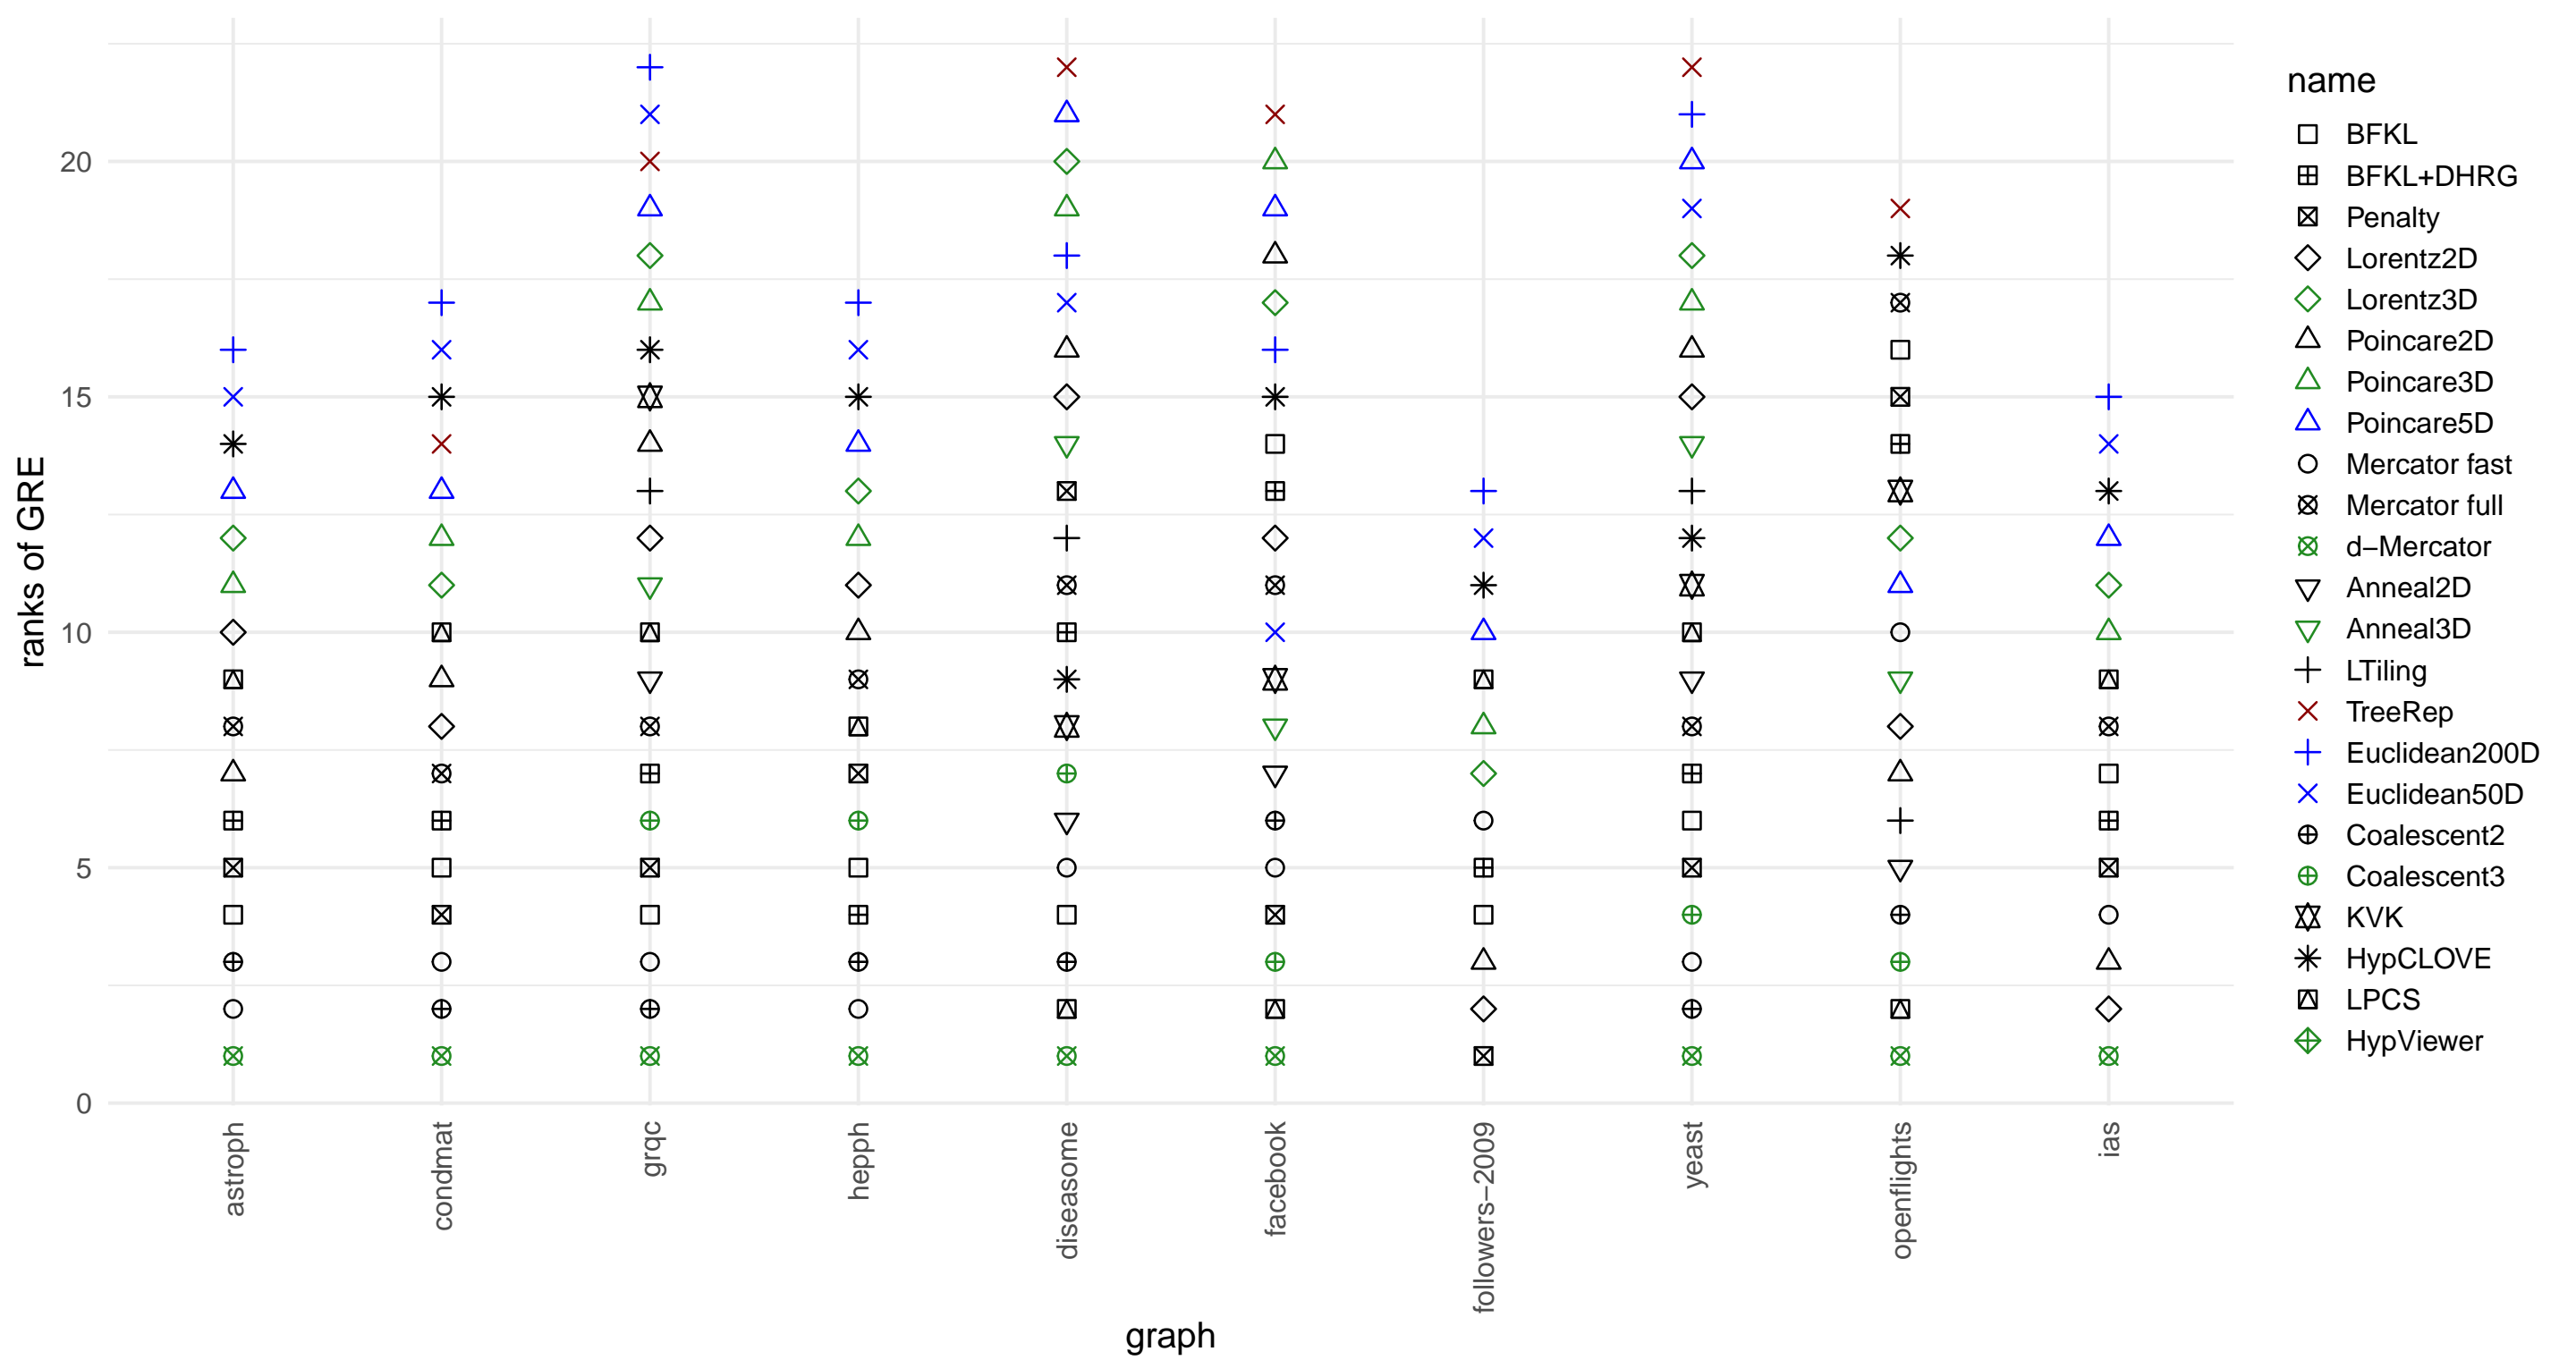

Supplement: supplementary_material [file real-world_gre_ranking.pdf › bridging/tables/real-world_gre_ranking.pdf]

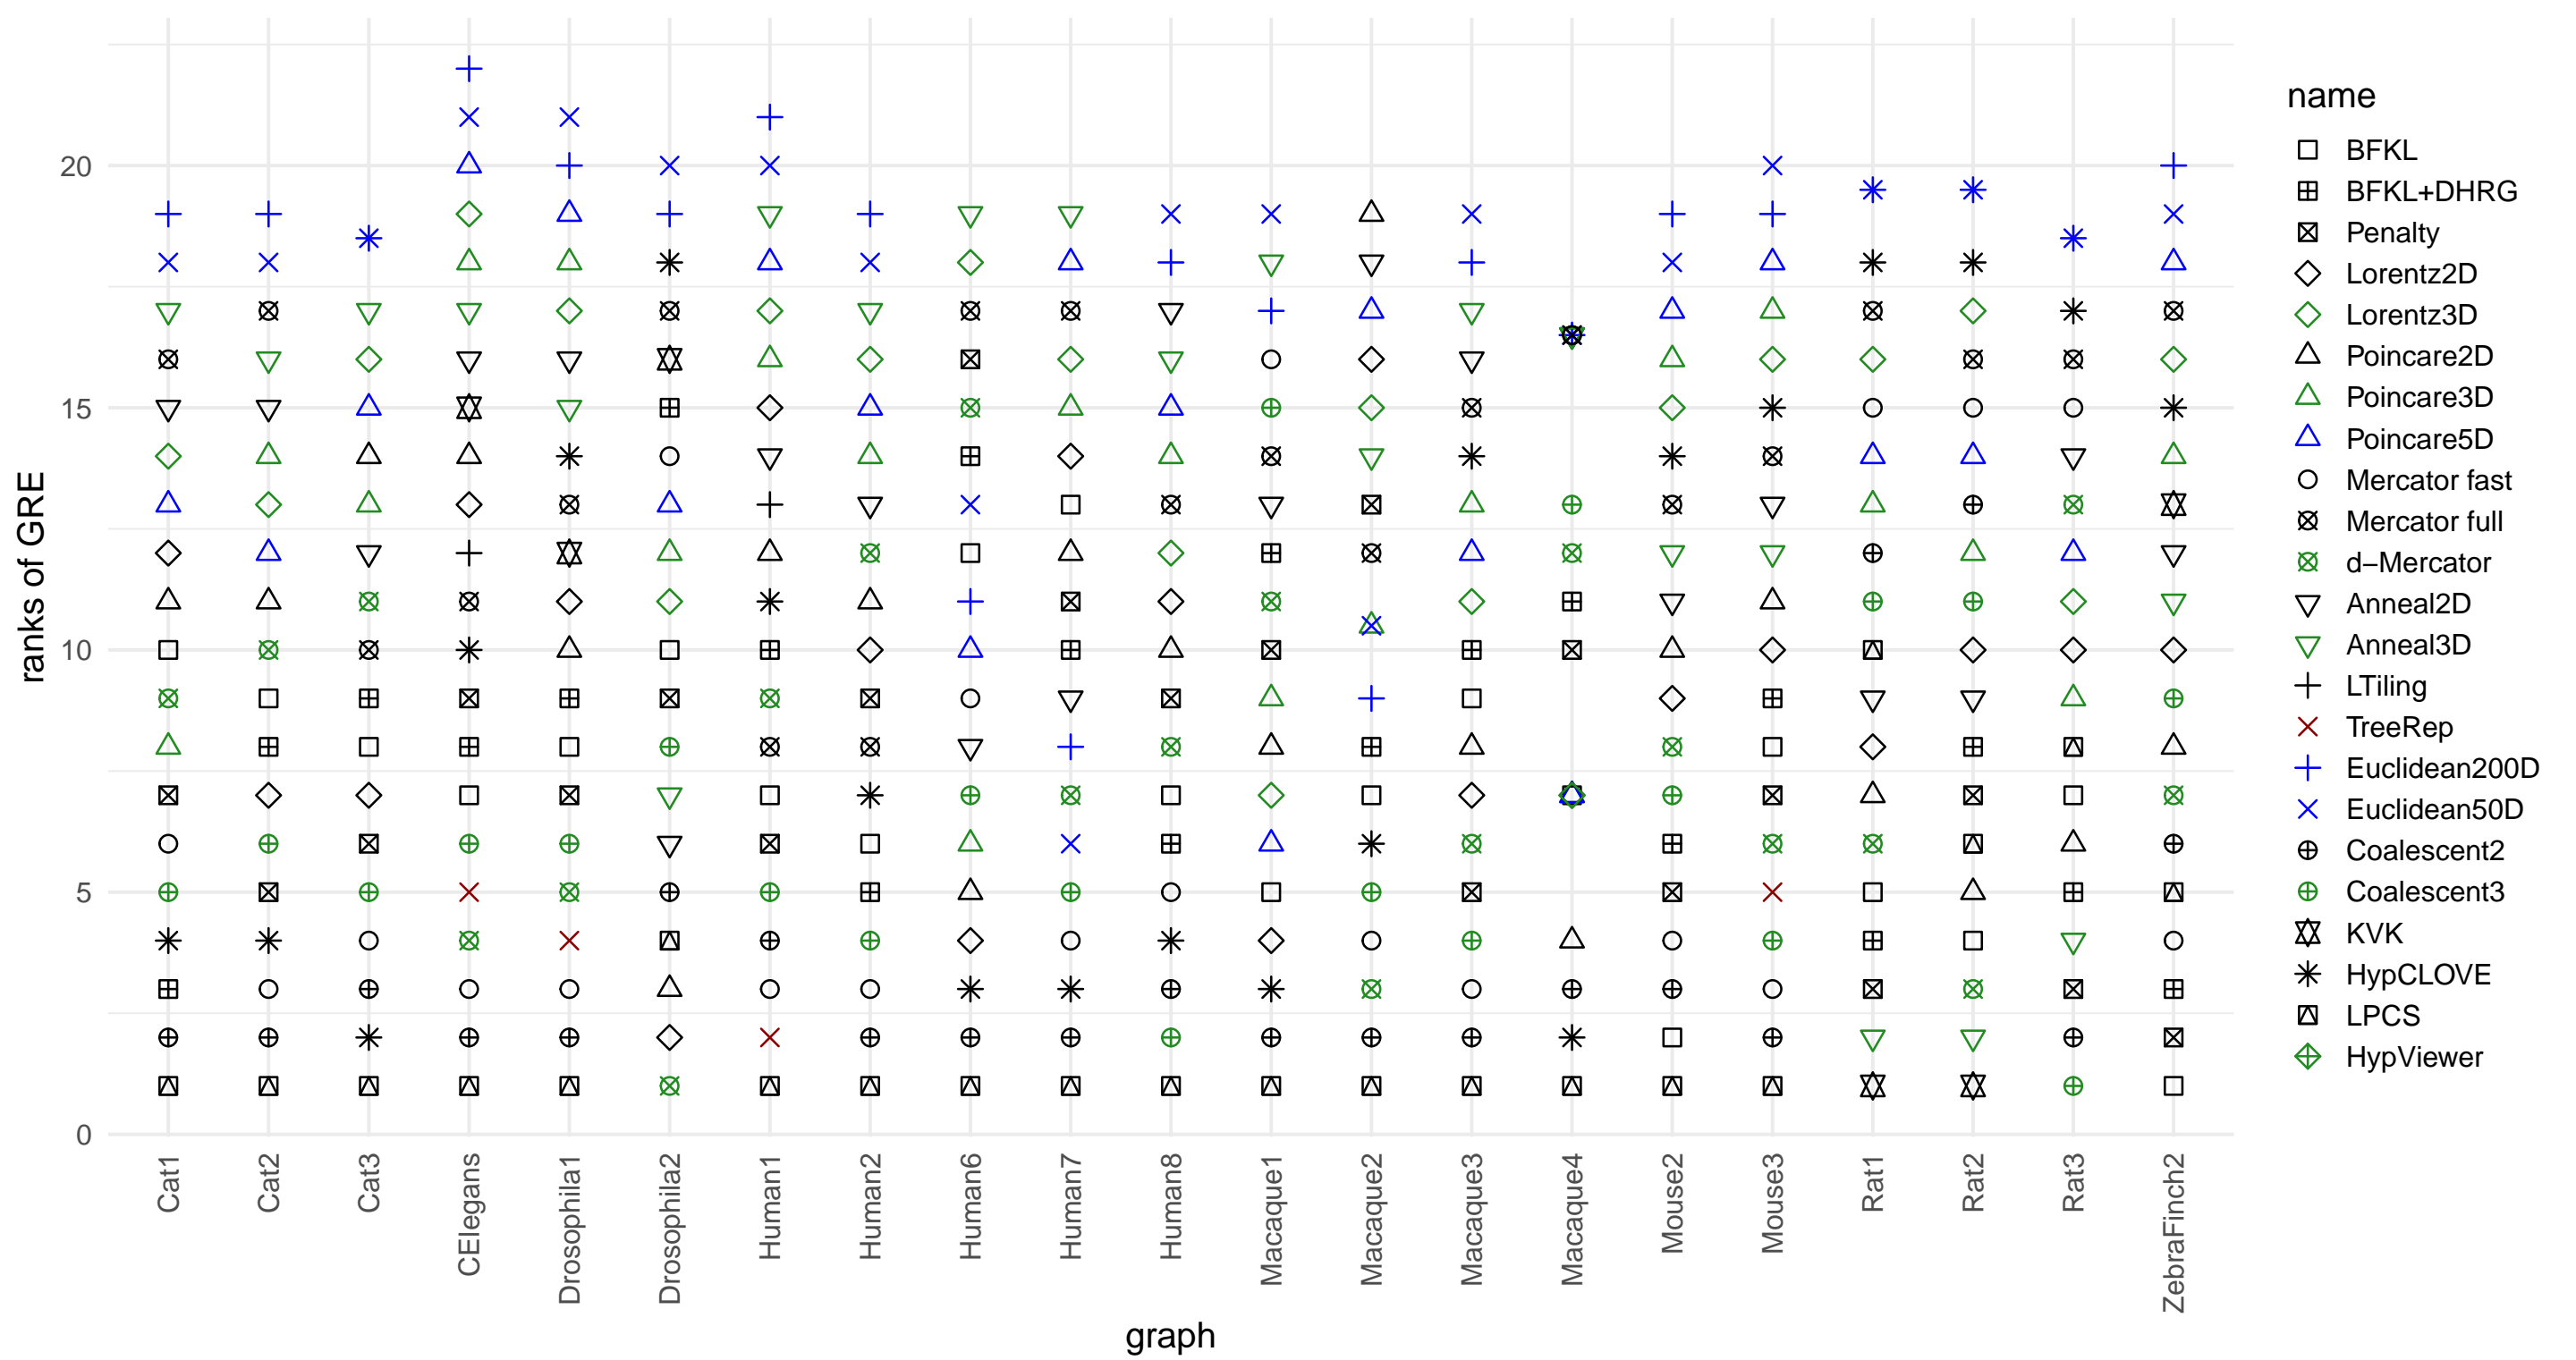

Supplement: supplementary_material [file real-world_gre_ranking_conn.pdf › bridging/tables/real-world_gre_ranking_conn.pdf]

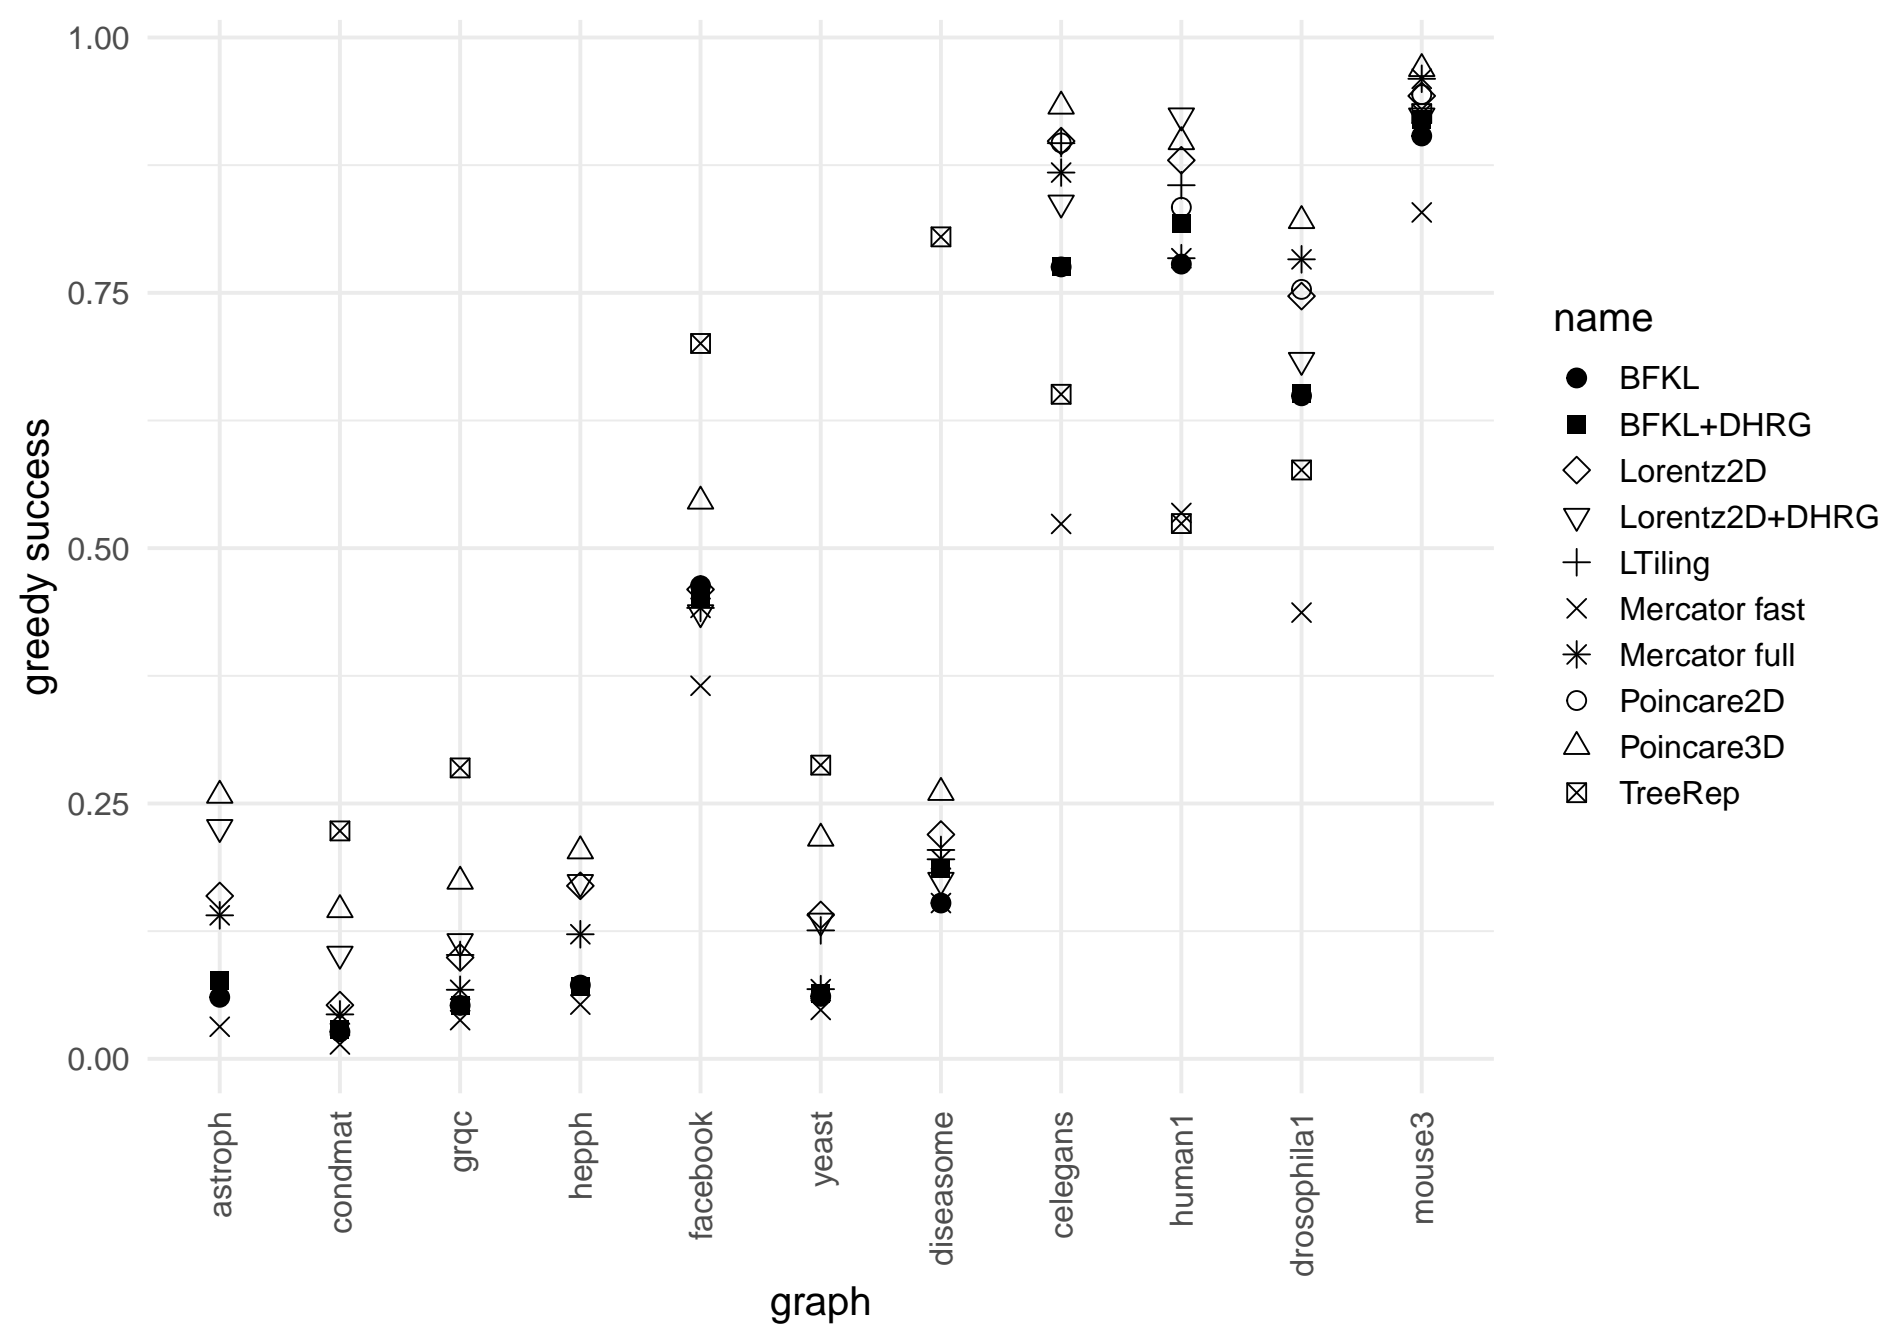

Supplement: supplementary_material [file real-world_greedy.pdf › bridging/tables/real-world_greedy.pdf]

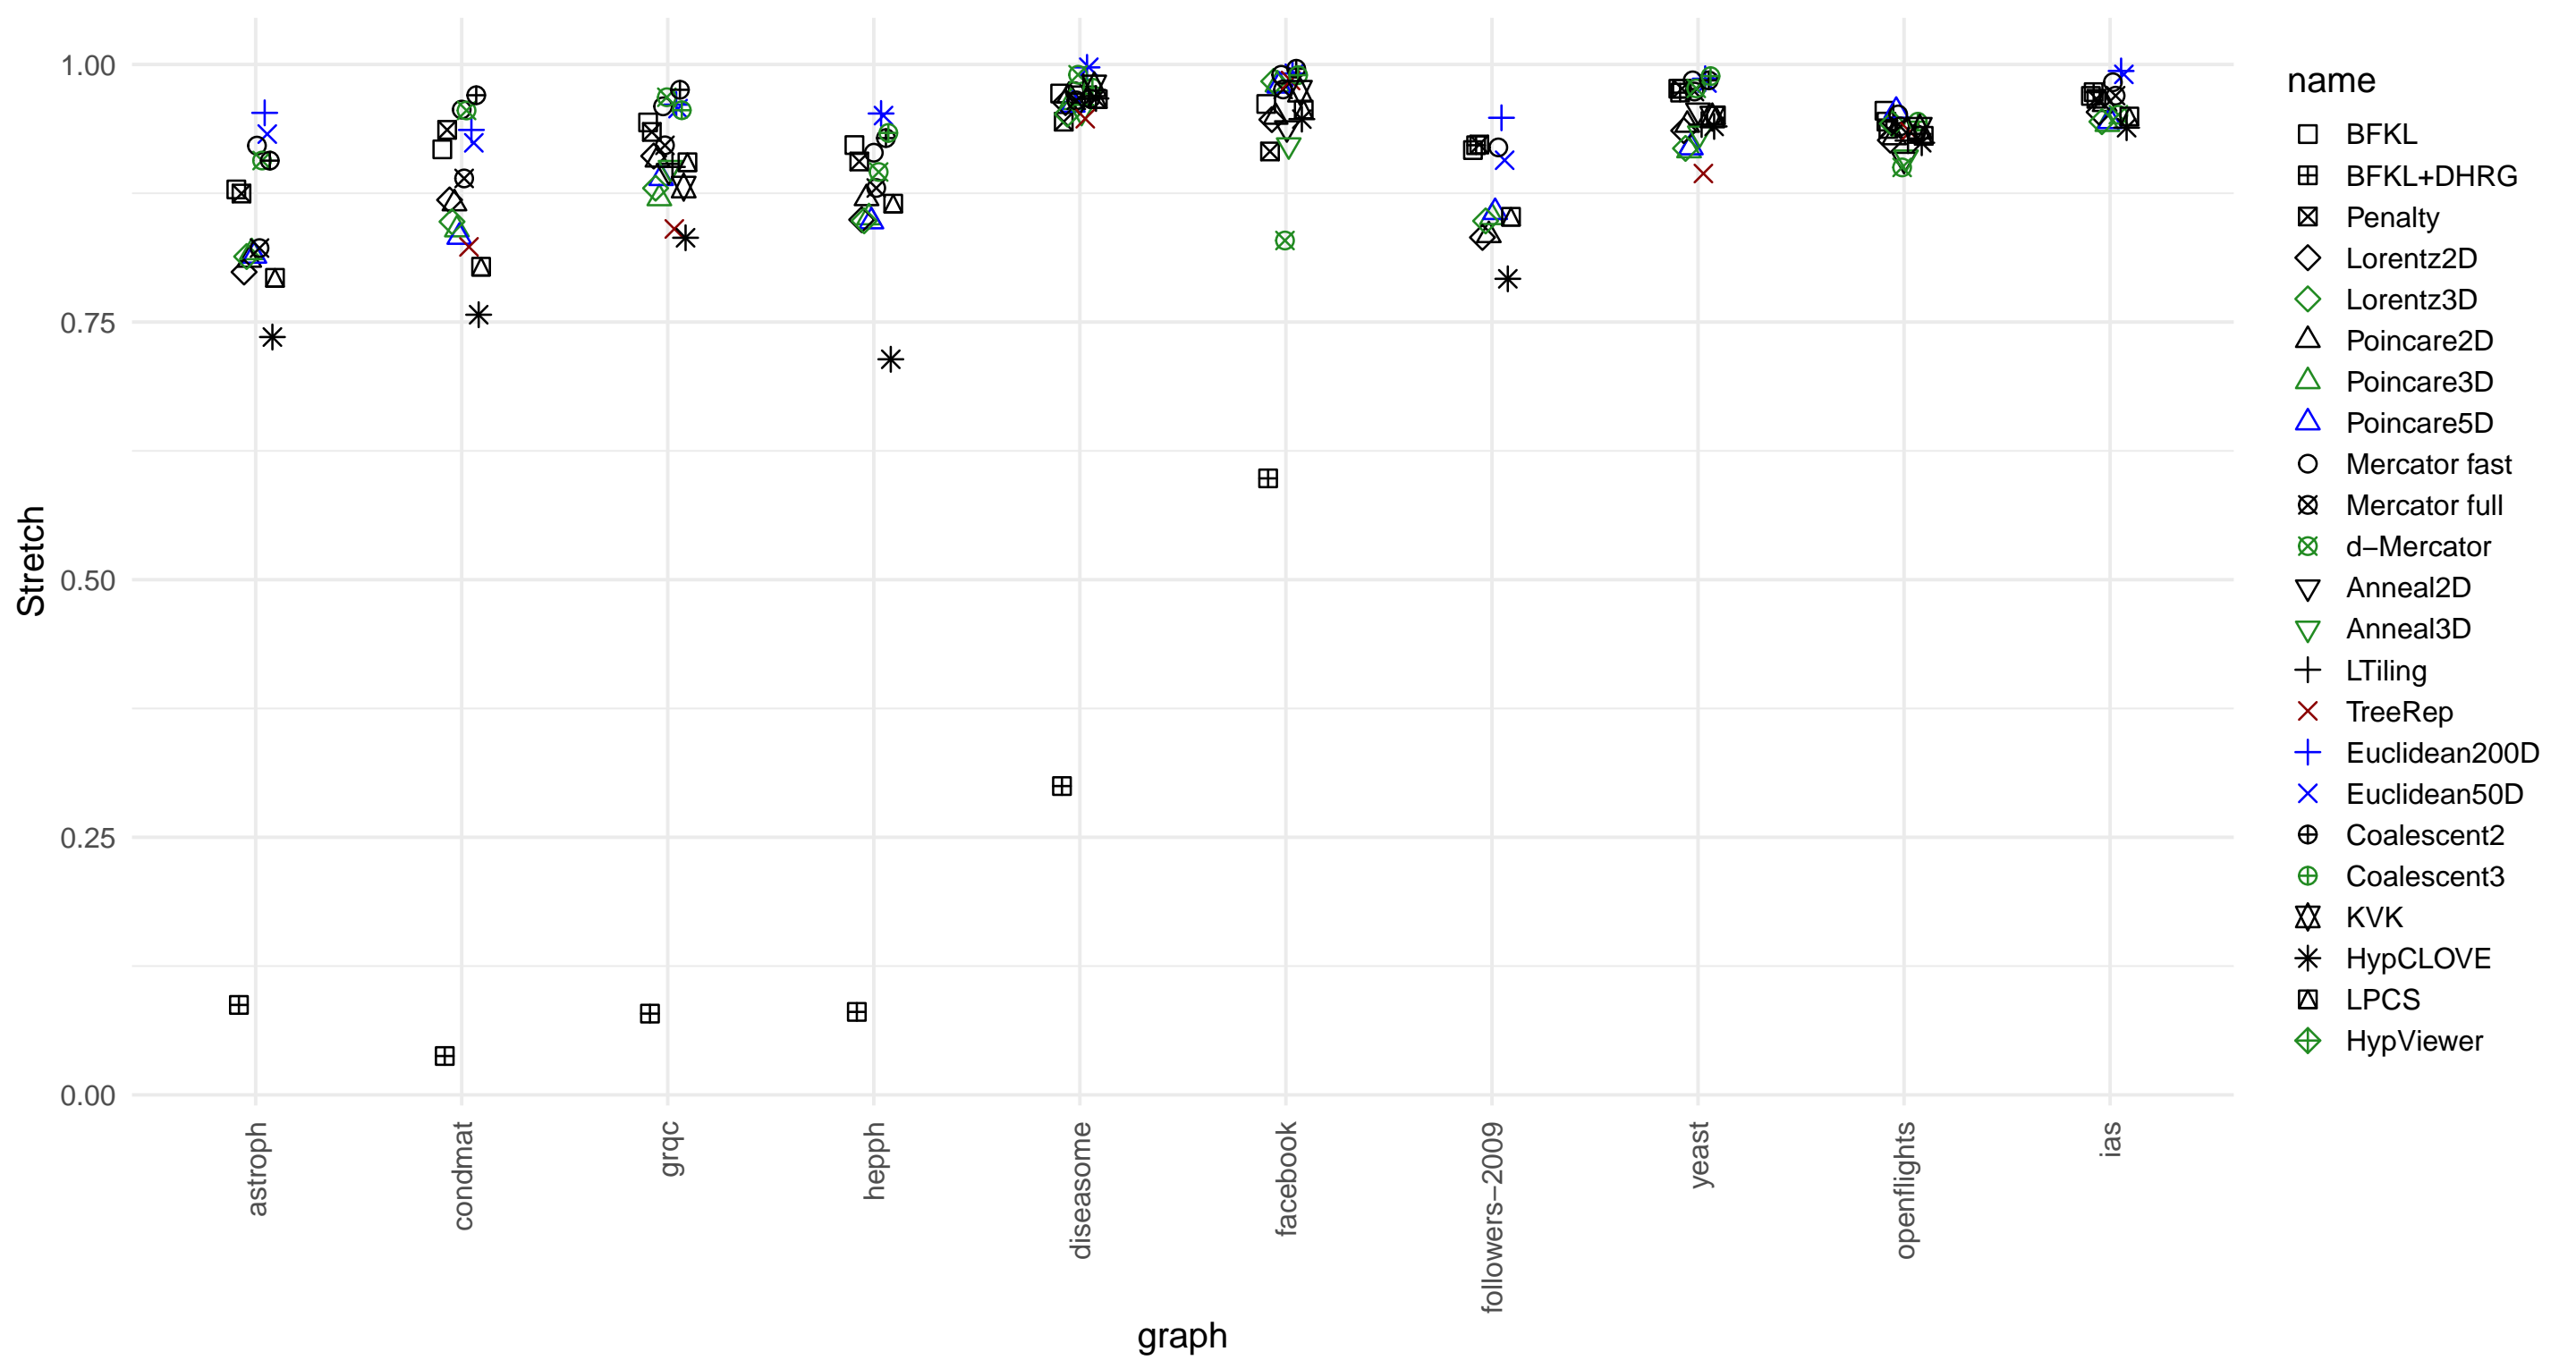

Supplement: supplementary_material [file real-world_stretch.pdf › bridging/tables/real-world_stretch.pdf]

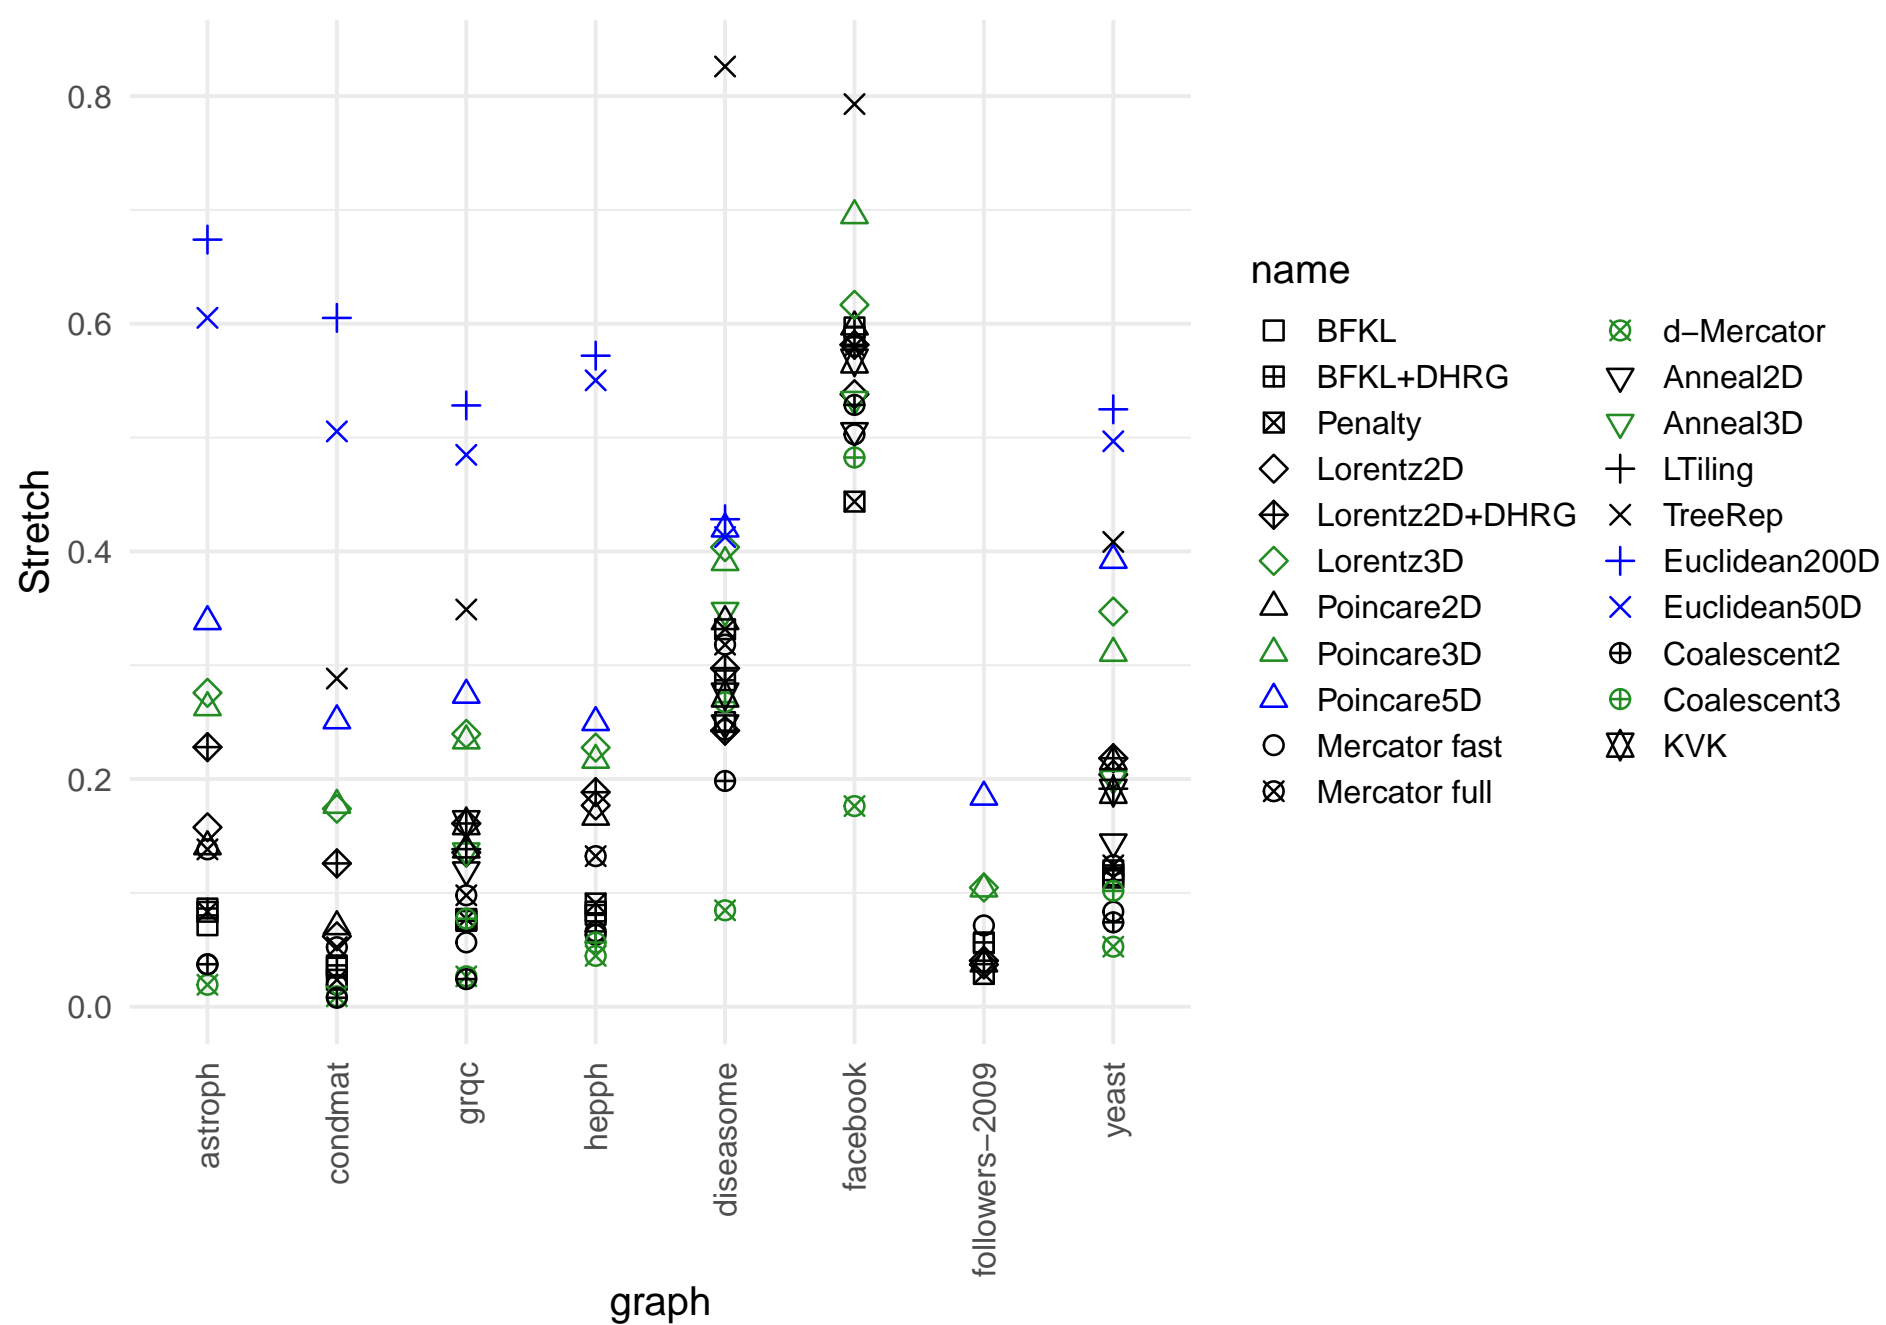

Supplement: supplementary_material [file real-world_stretch.pdf › bridging/tables/real-world_stretch.pdf]

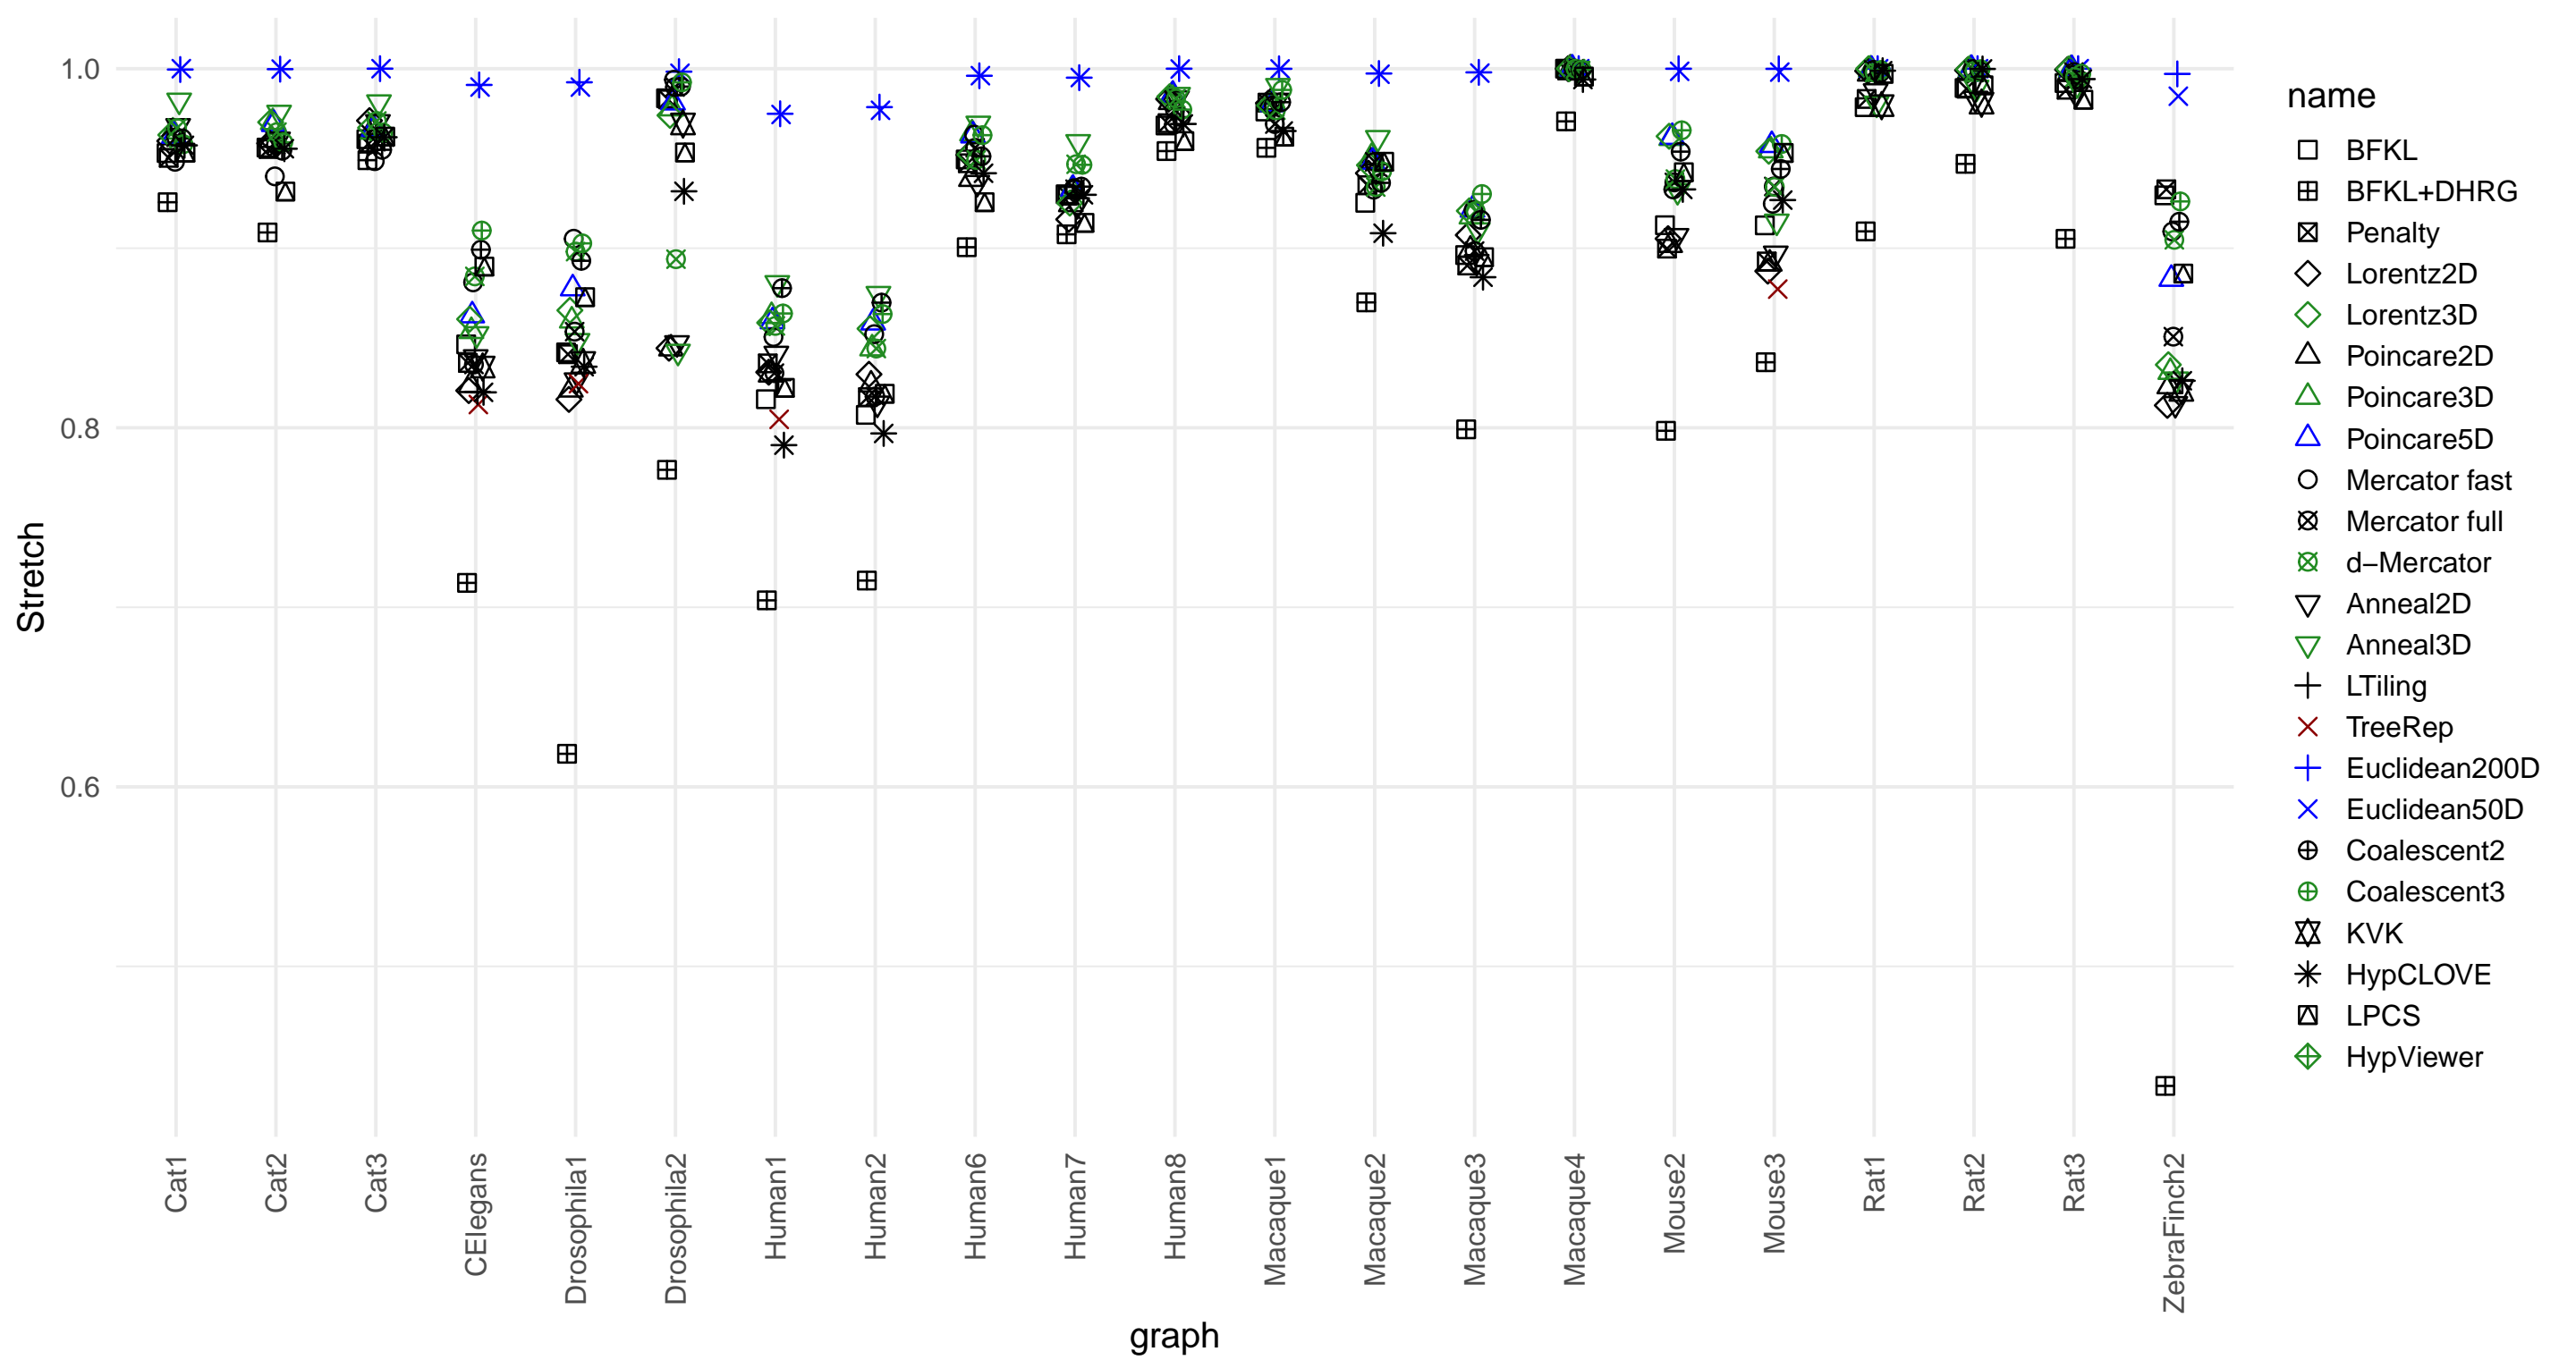

Supplement: supplementary_material [file real-world_stretch_conn.pdf › bridging/tables/real-world_stretch_conn.pdf]

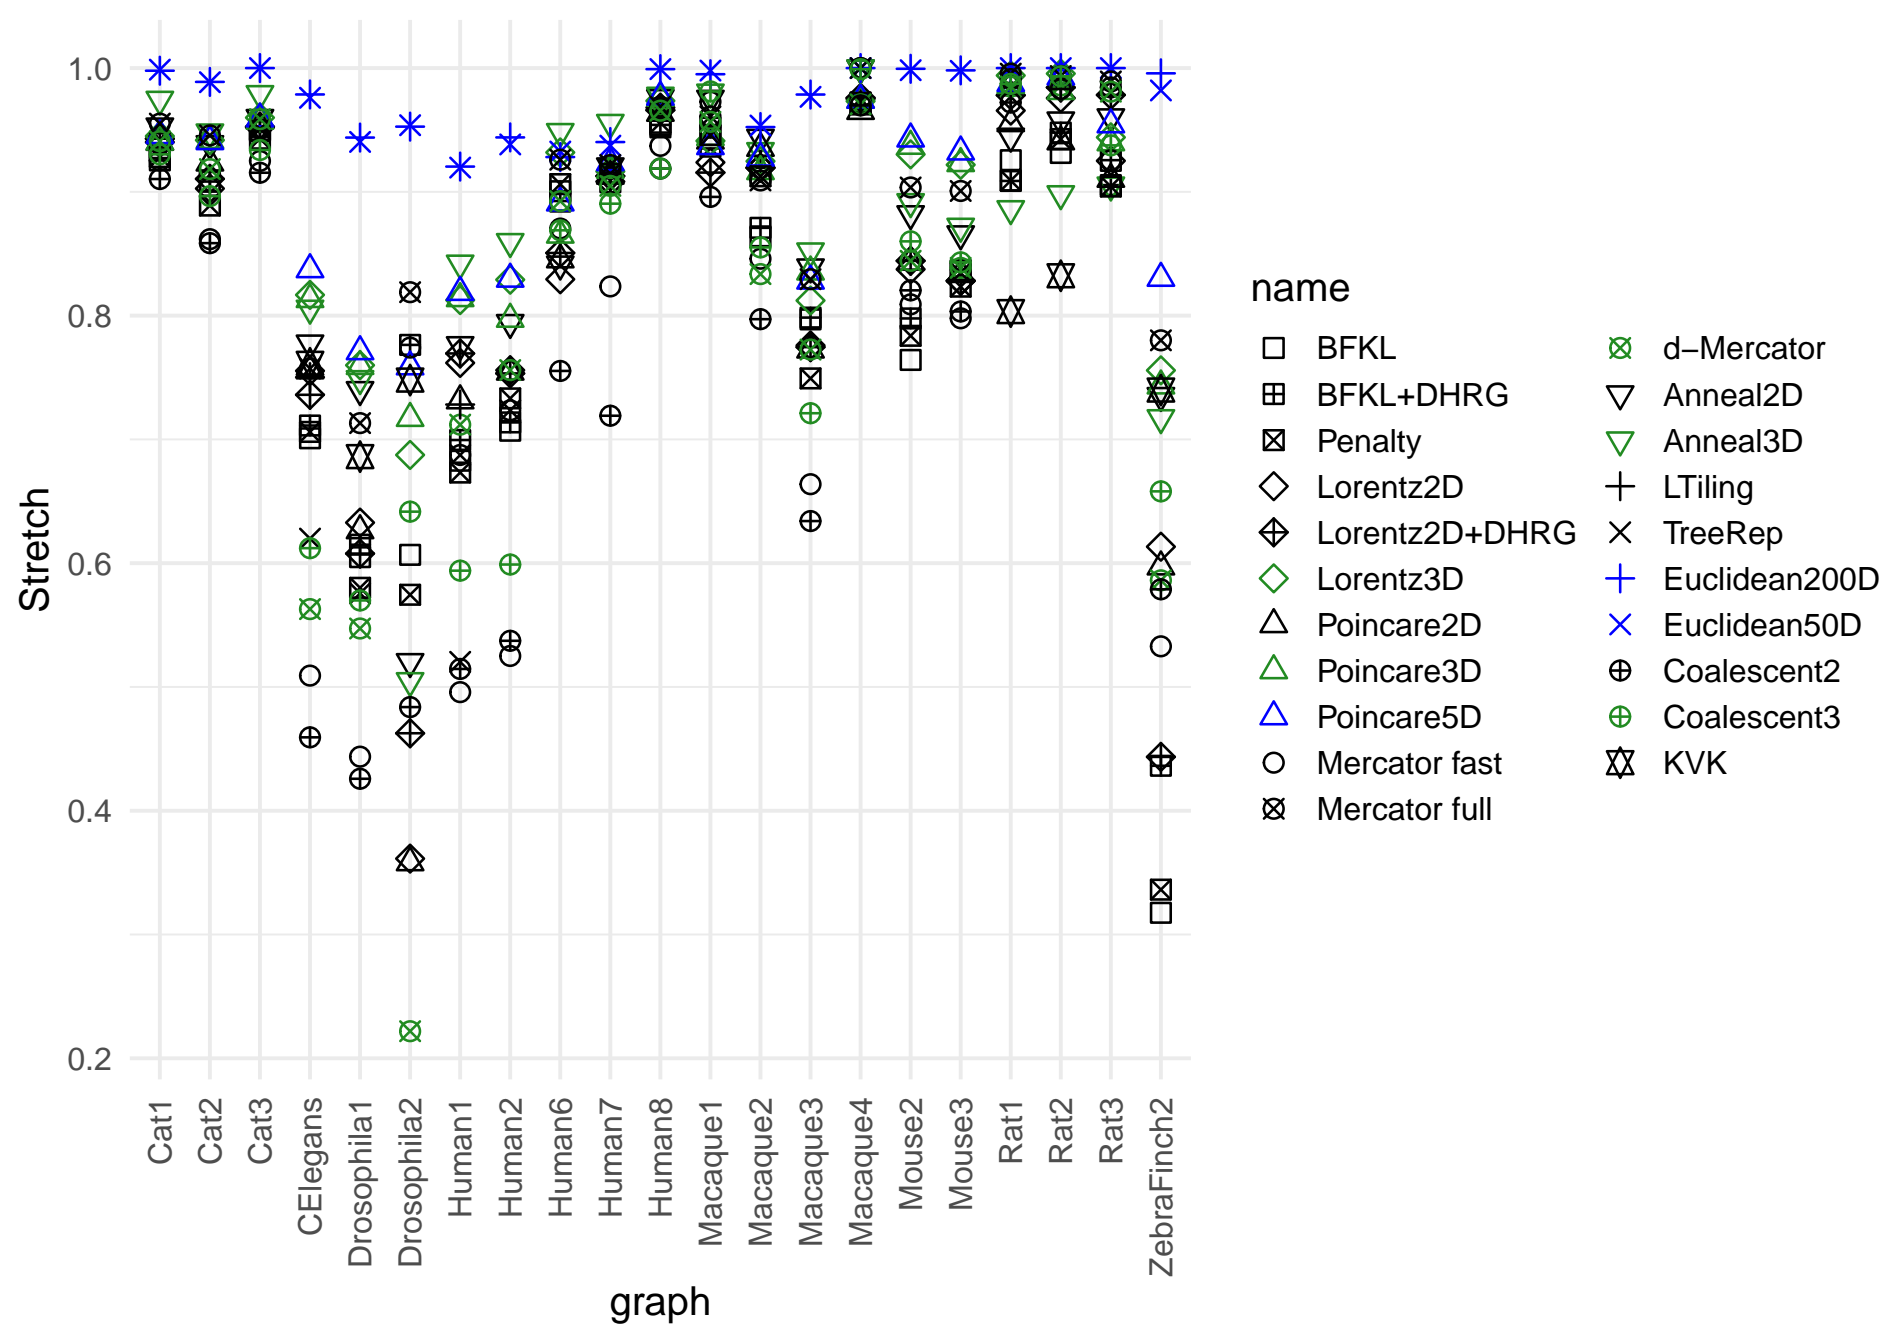

Supplement: supplementary_material [file real-world_stretch_conn.pdf › bridging/tables/real-world_stretch_conn.pdf]

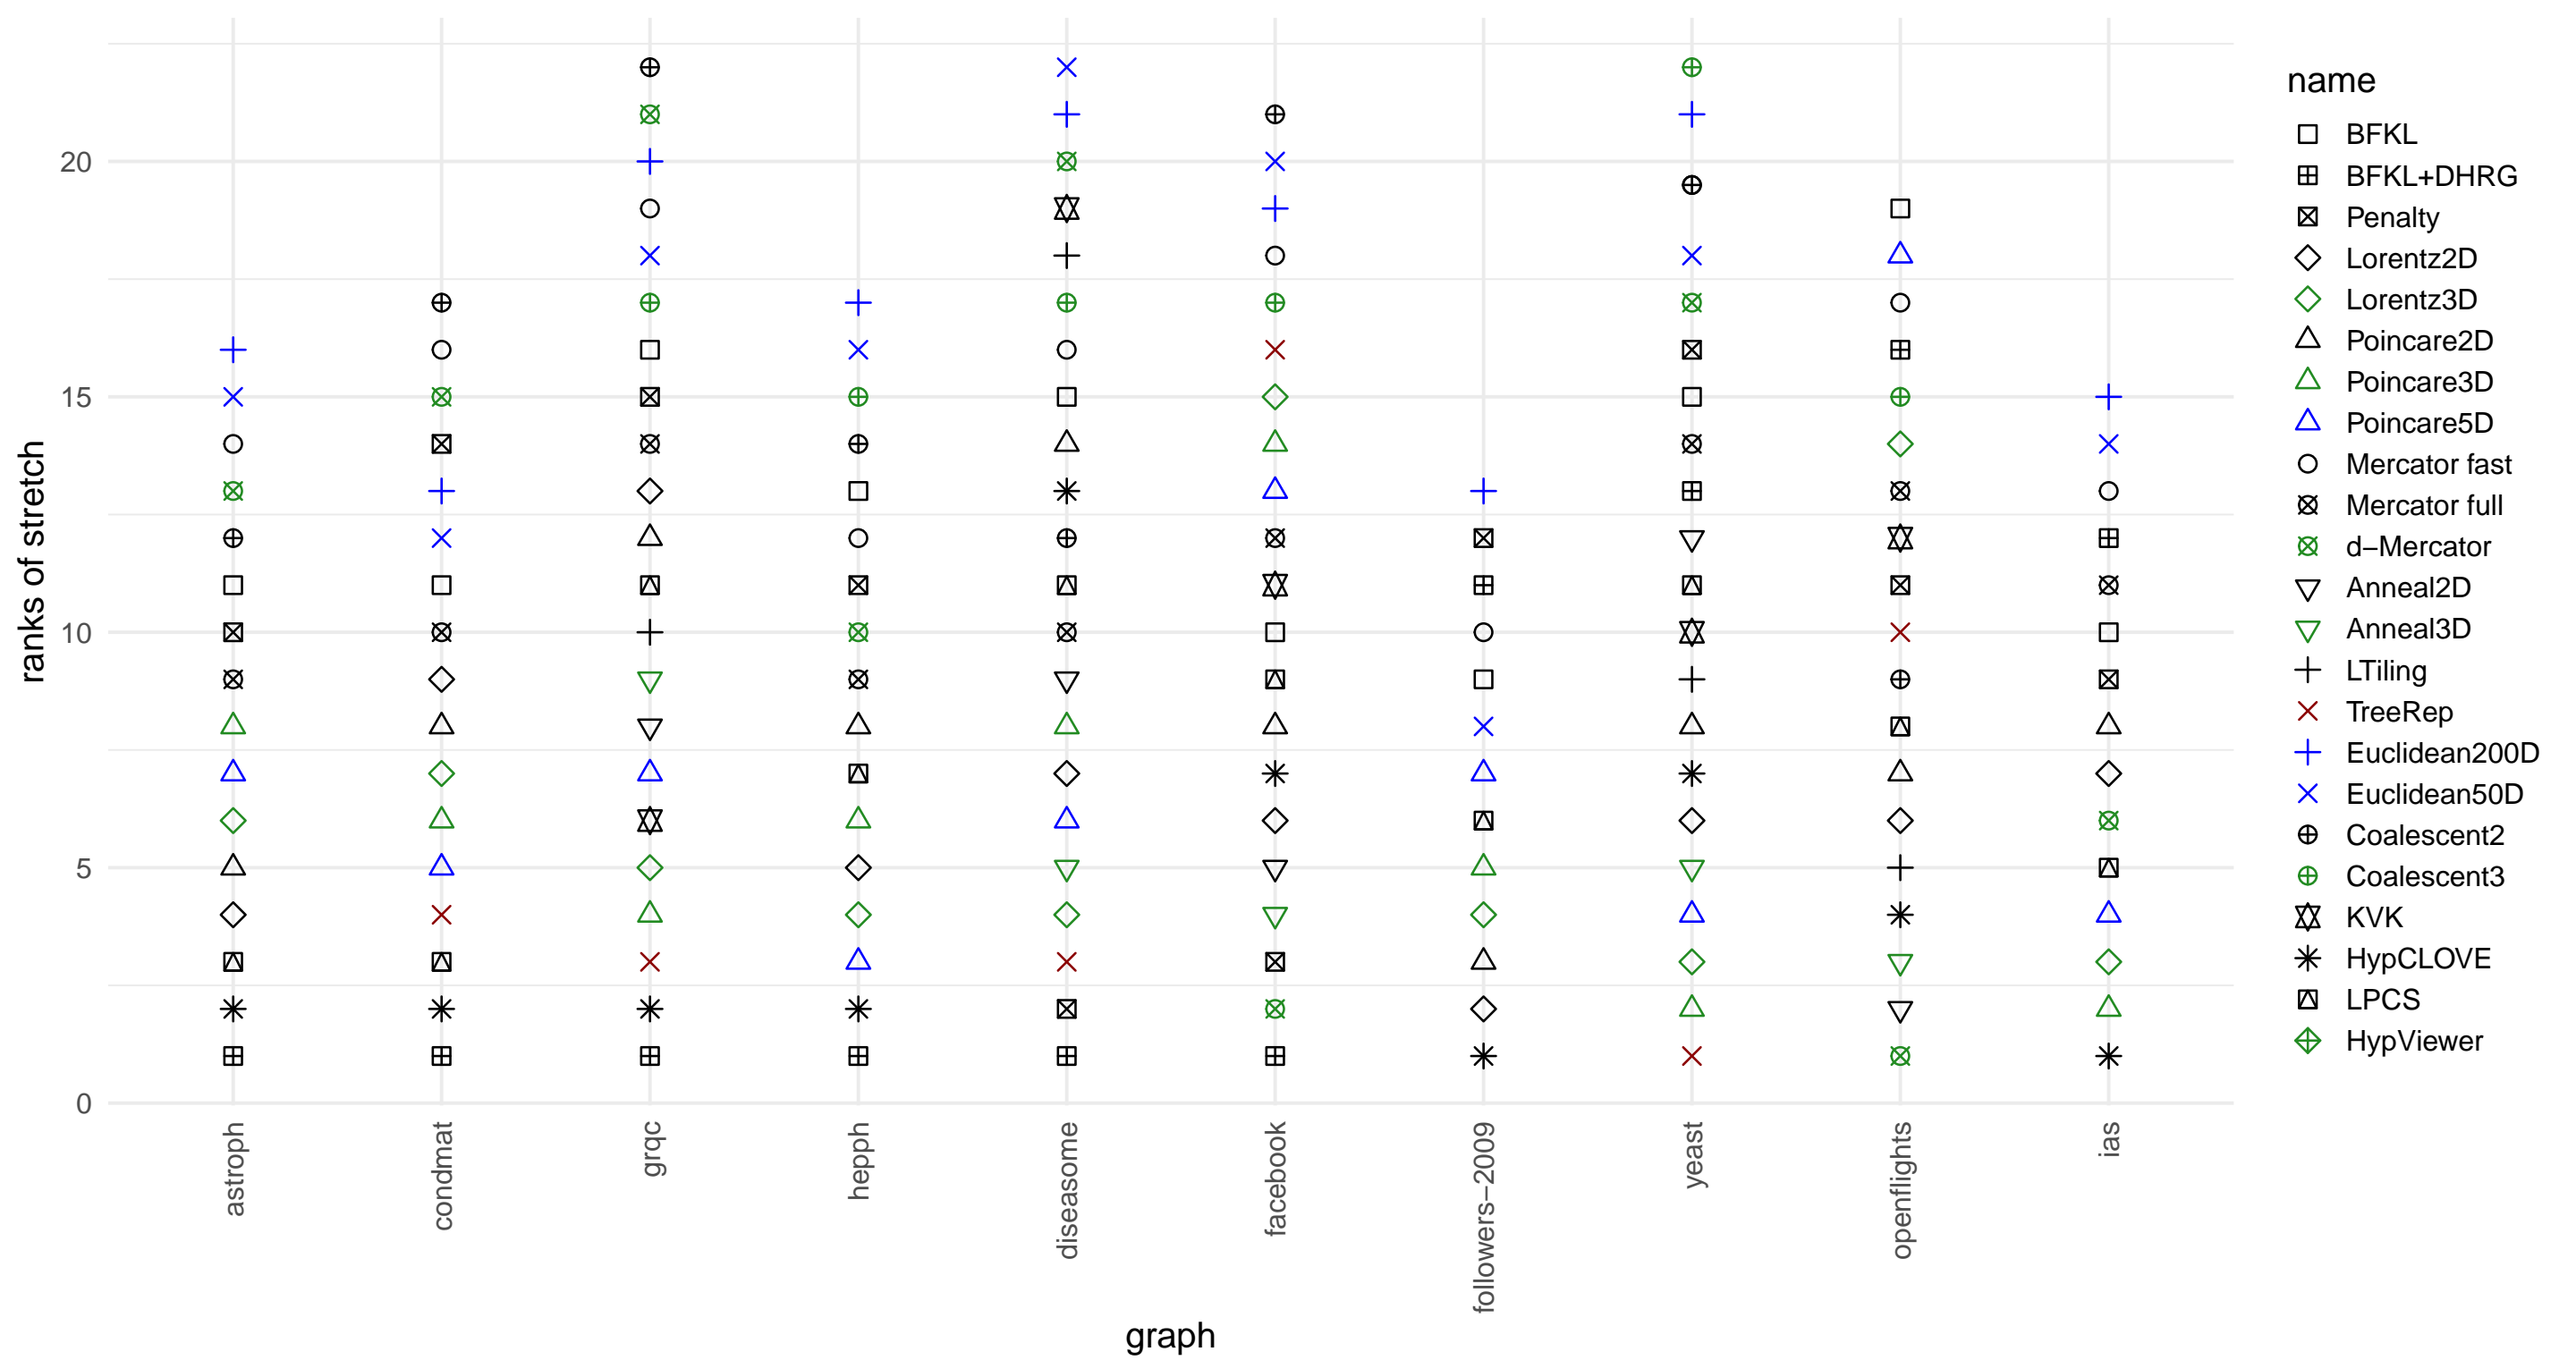

Supplement: supplementary_material [file real-world_stretch_ranking.pdf › bridging/tables/real-world_stretch_ranking.pdf]

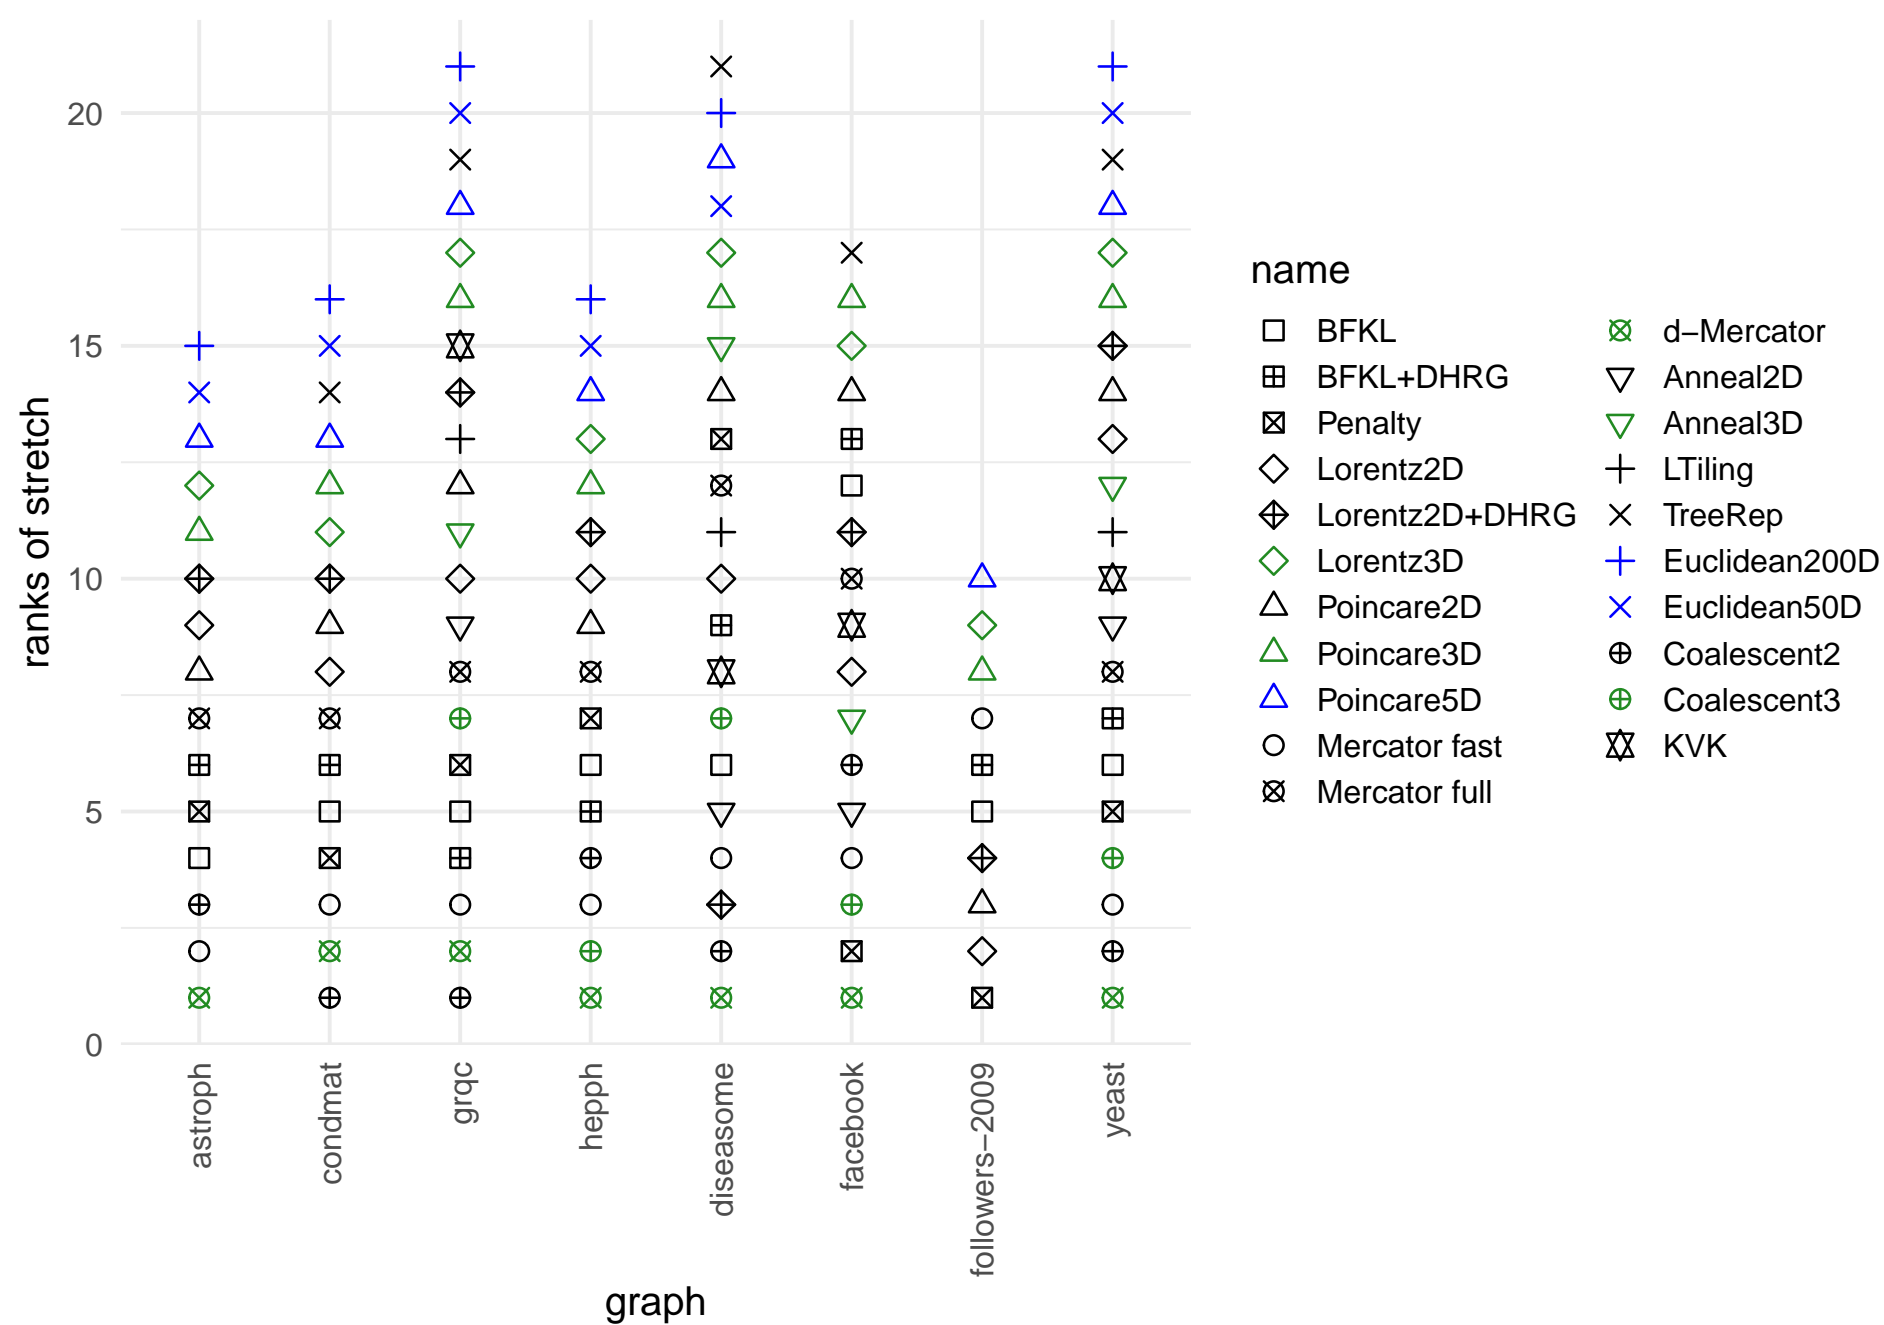

Supplement: supplementary_material [file real-world_stretch_ranking.pdf › bridging/tables/real-world_stretch_ranking.pdf]

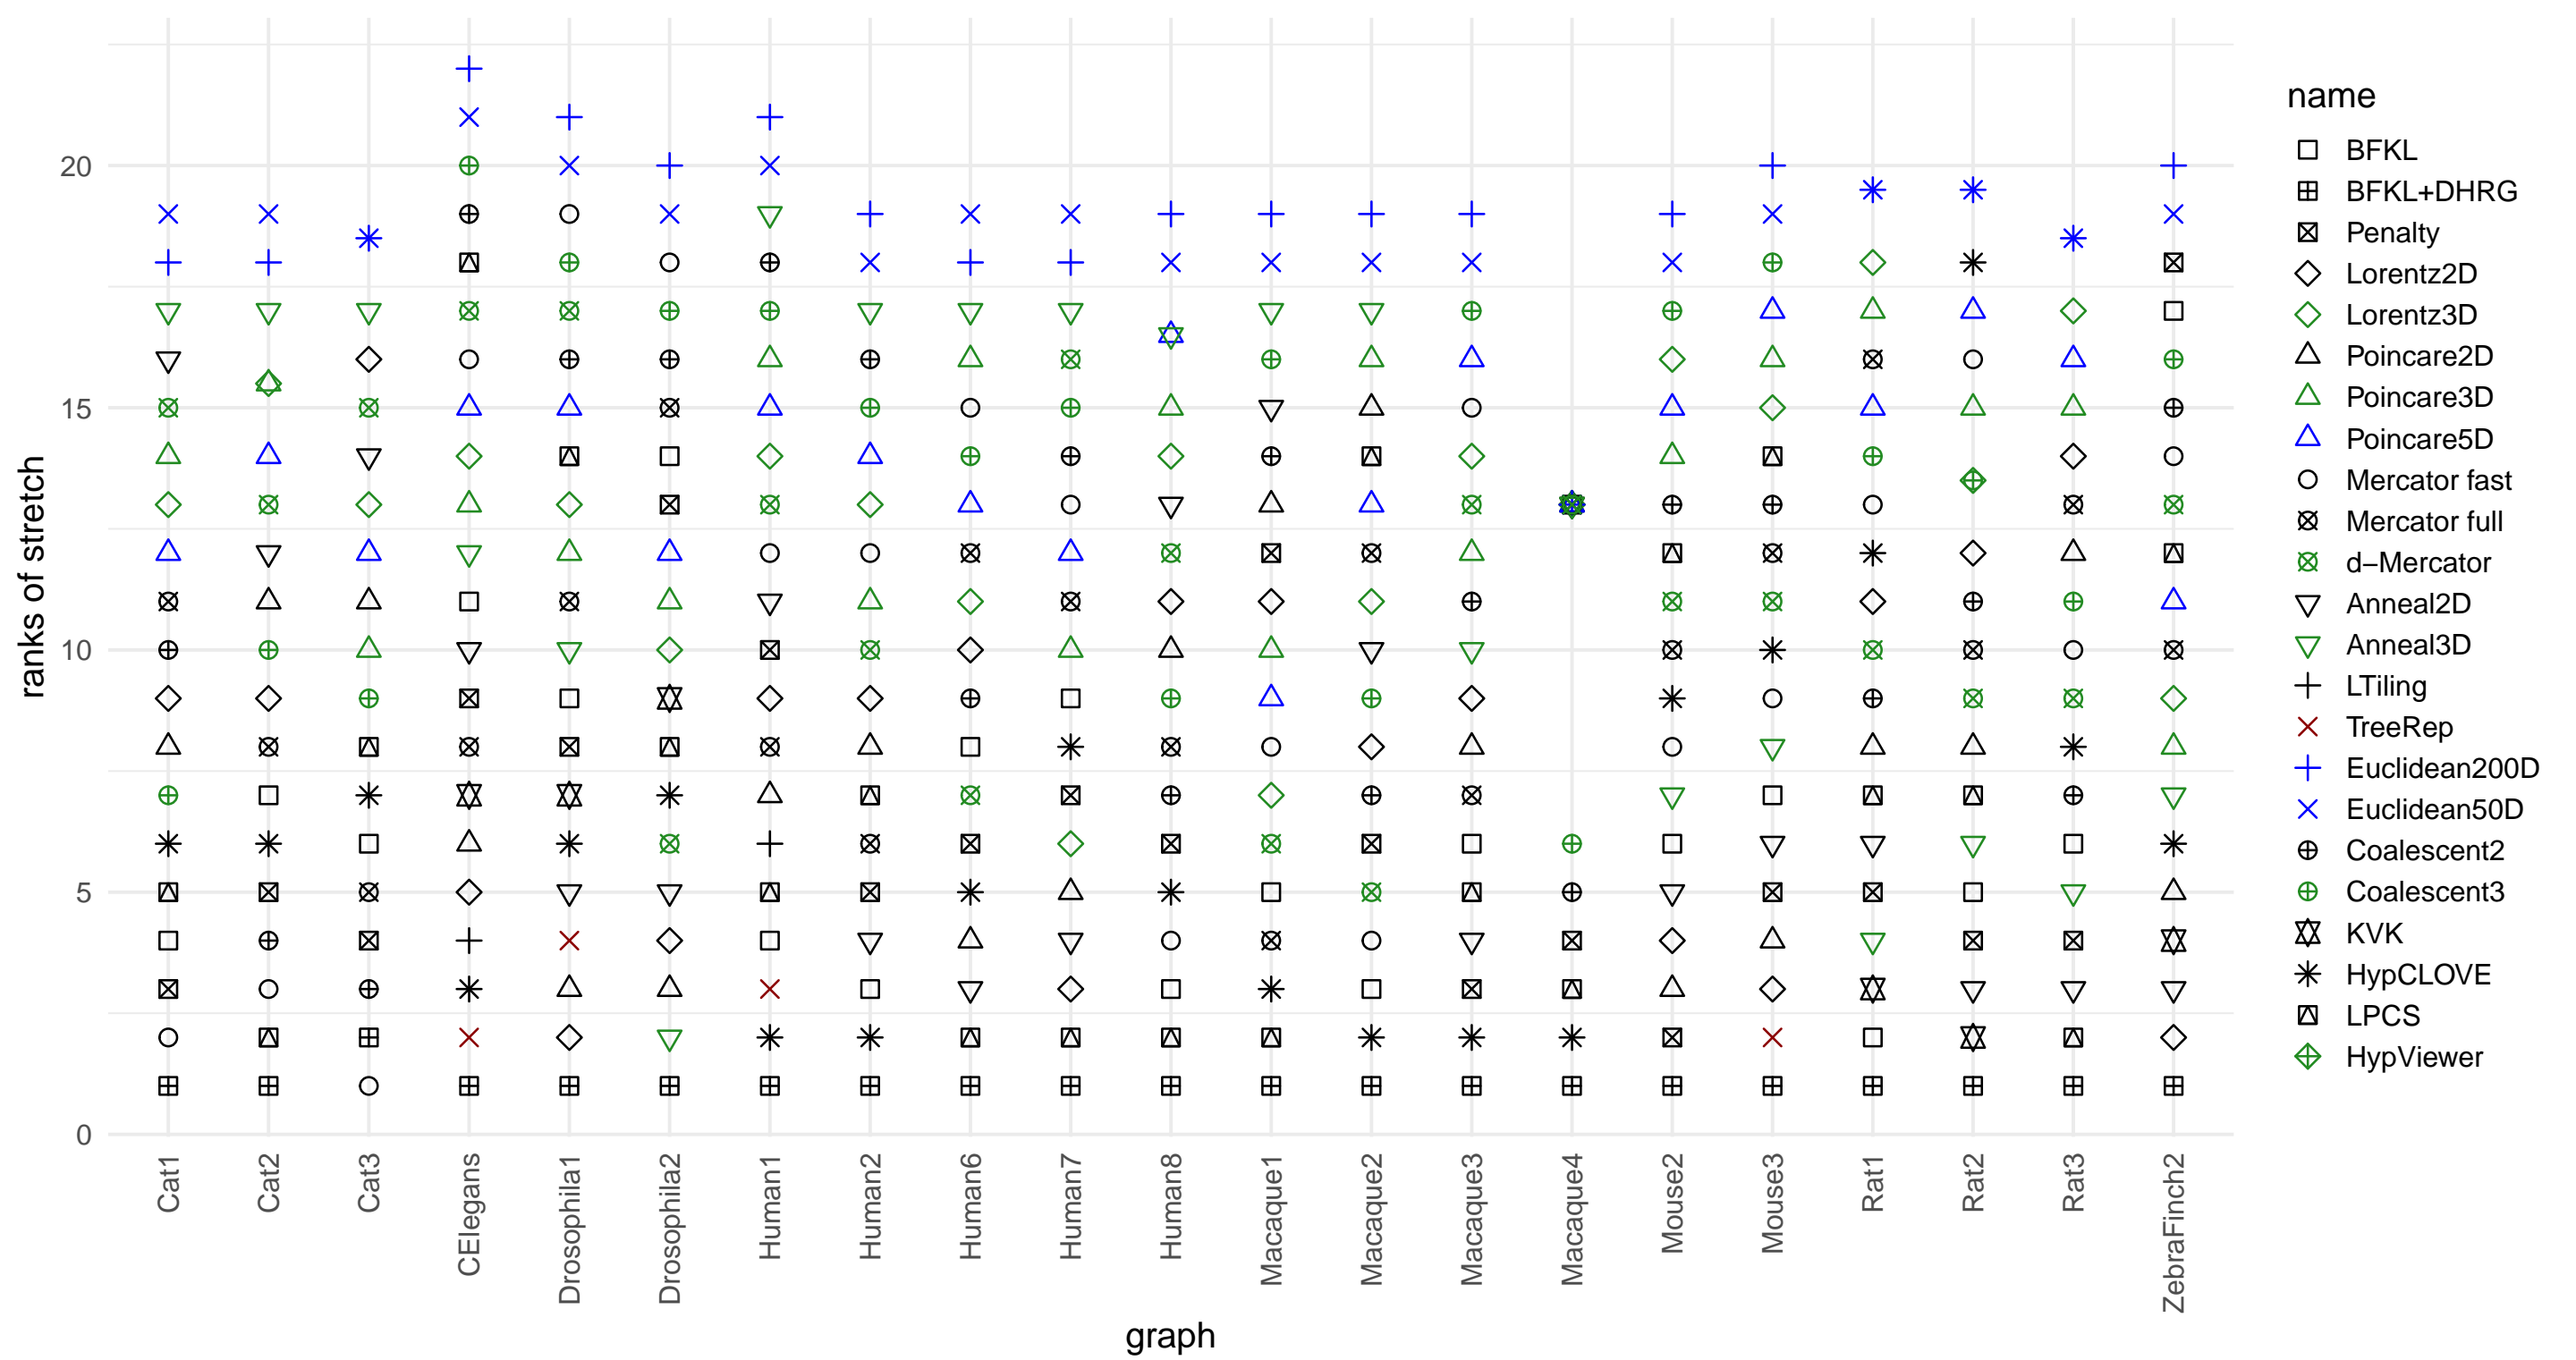

Supplement: supplementary_material [file real-world_stretch_ranking_conn.pdf › bridging/tables/real-world_stretch_ranking_conn.pdf]

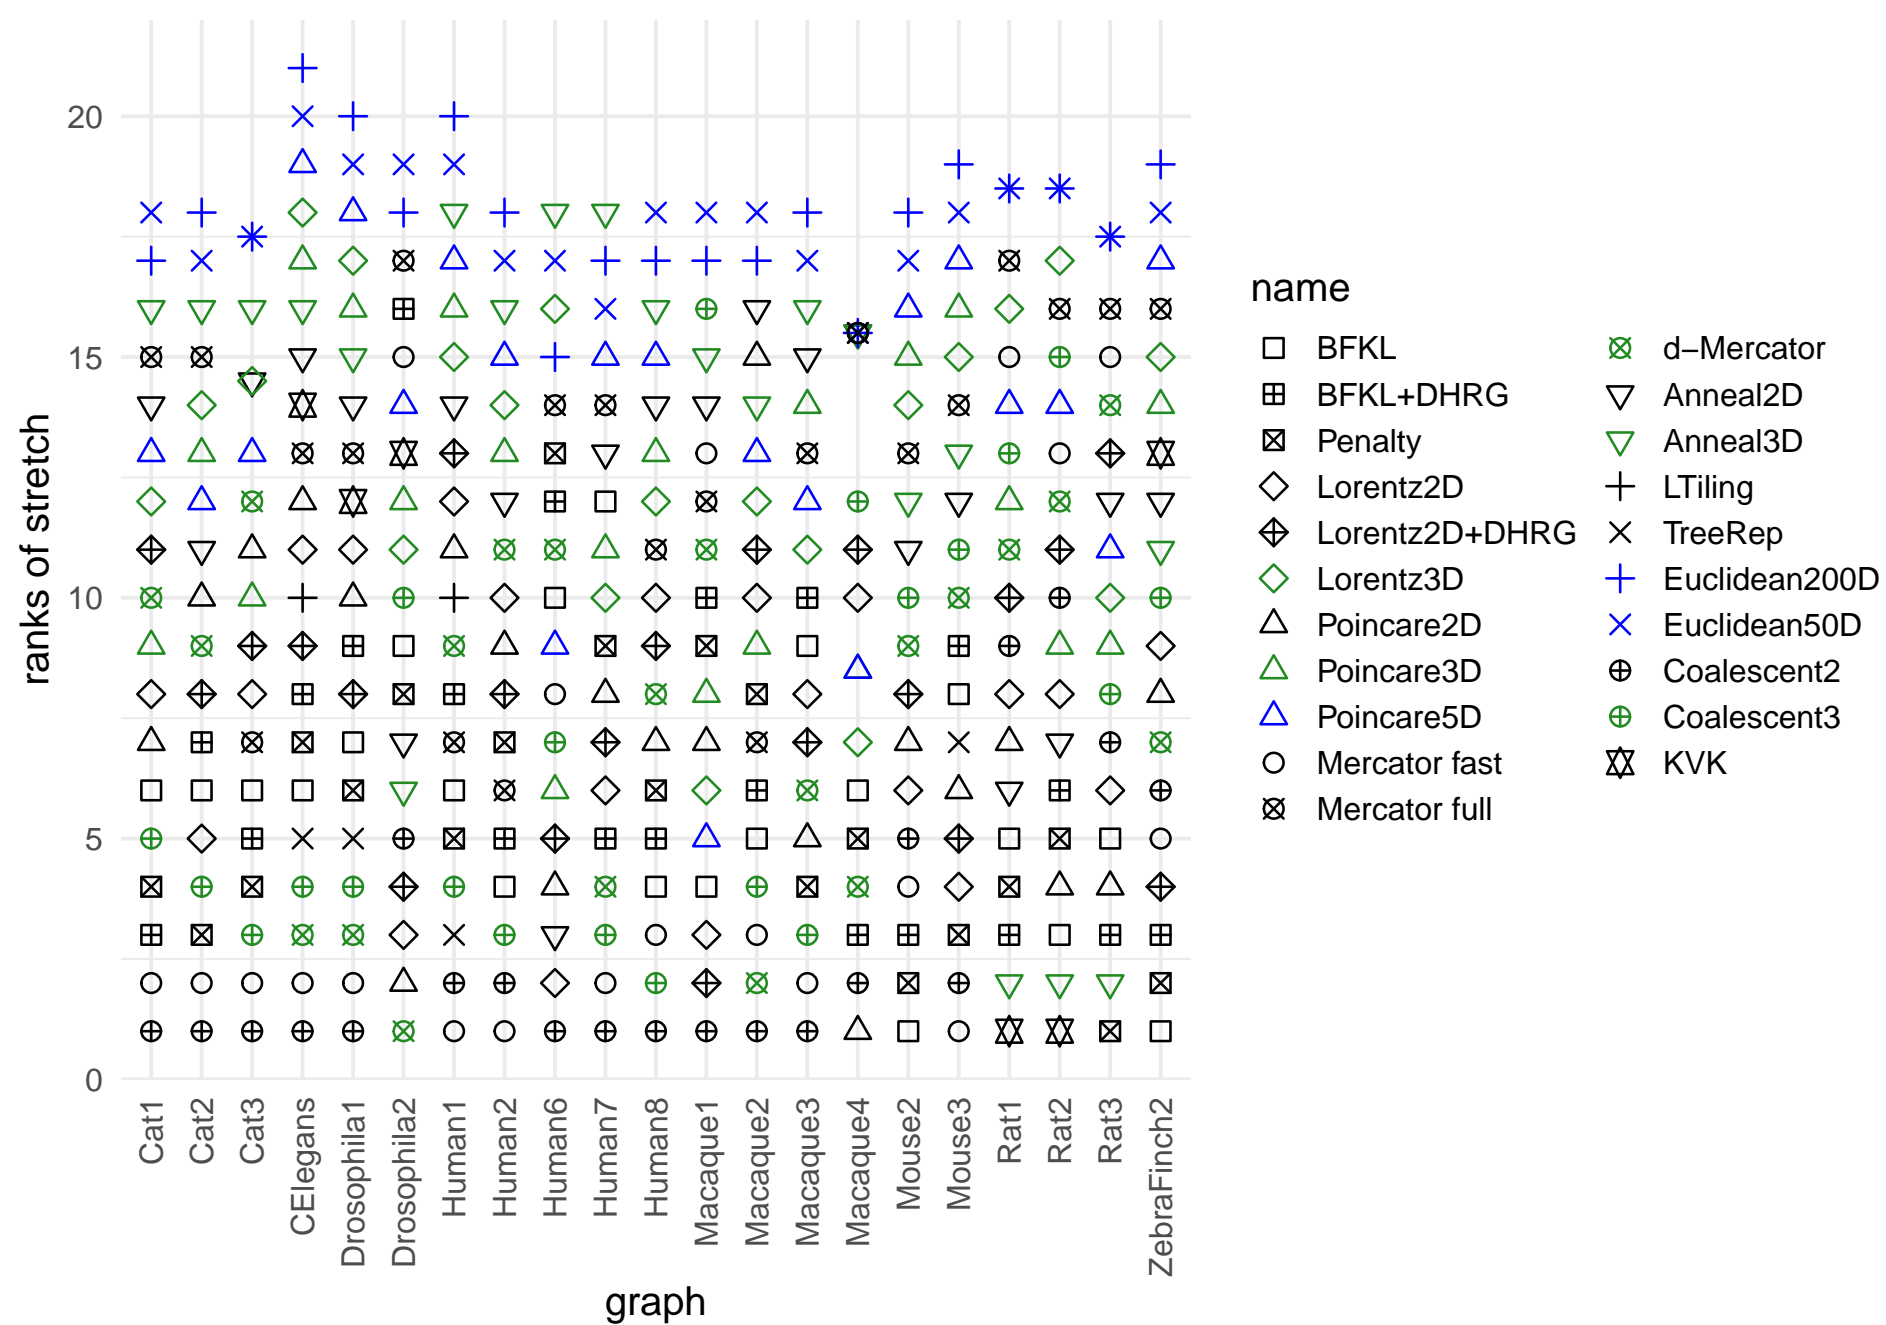

Supplement: supplementary_material [file real-world_stretch_ranking_conn.pdf › bridging/tables/real-world_stretch_ranking_conn.pdf]

Greedy success rate

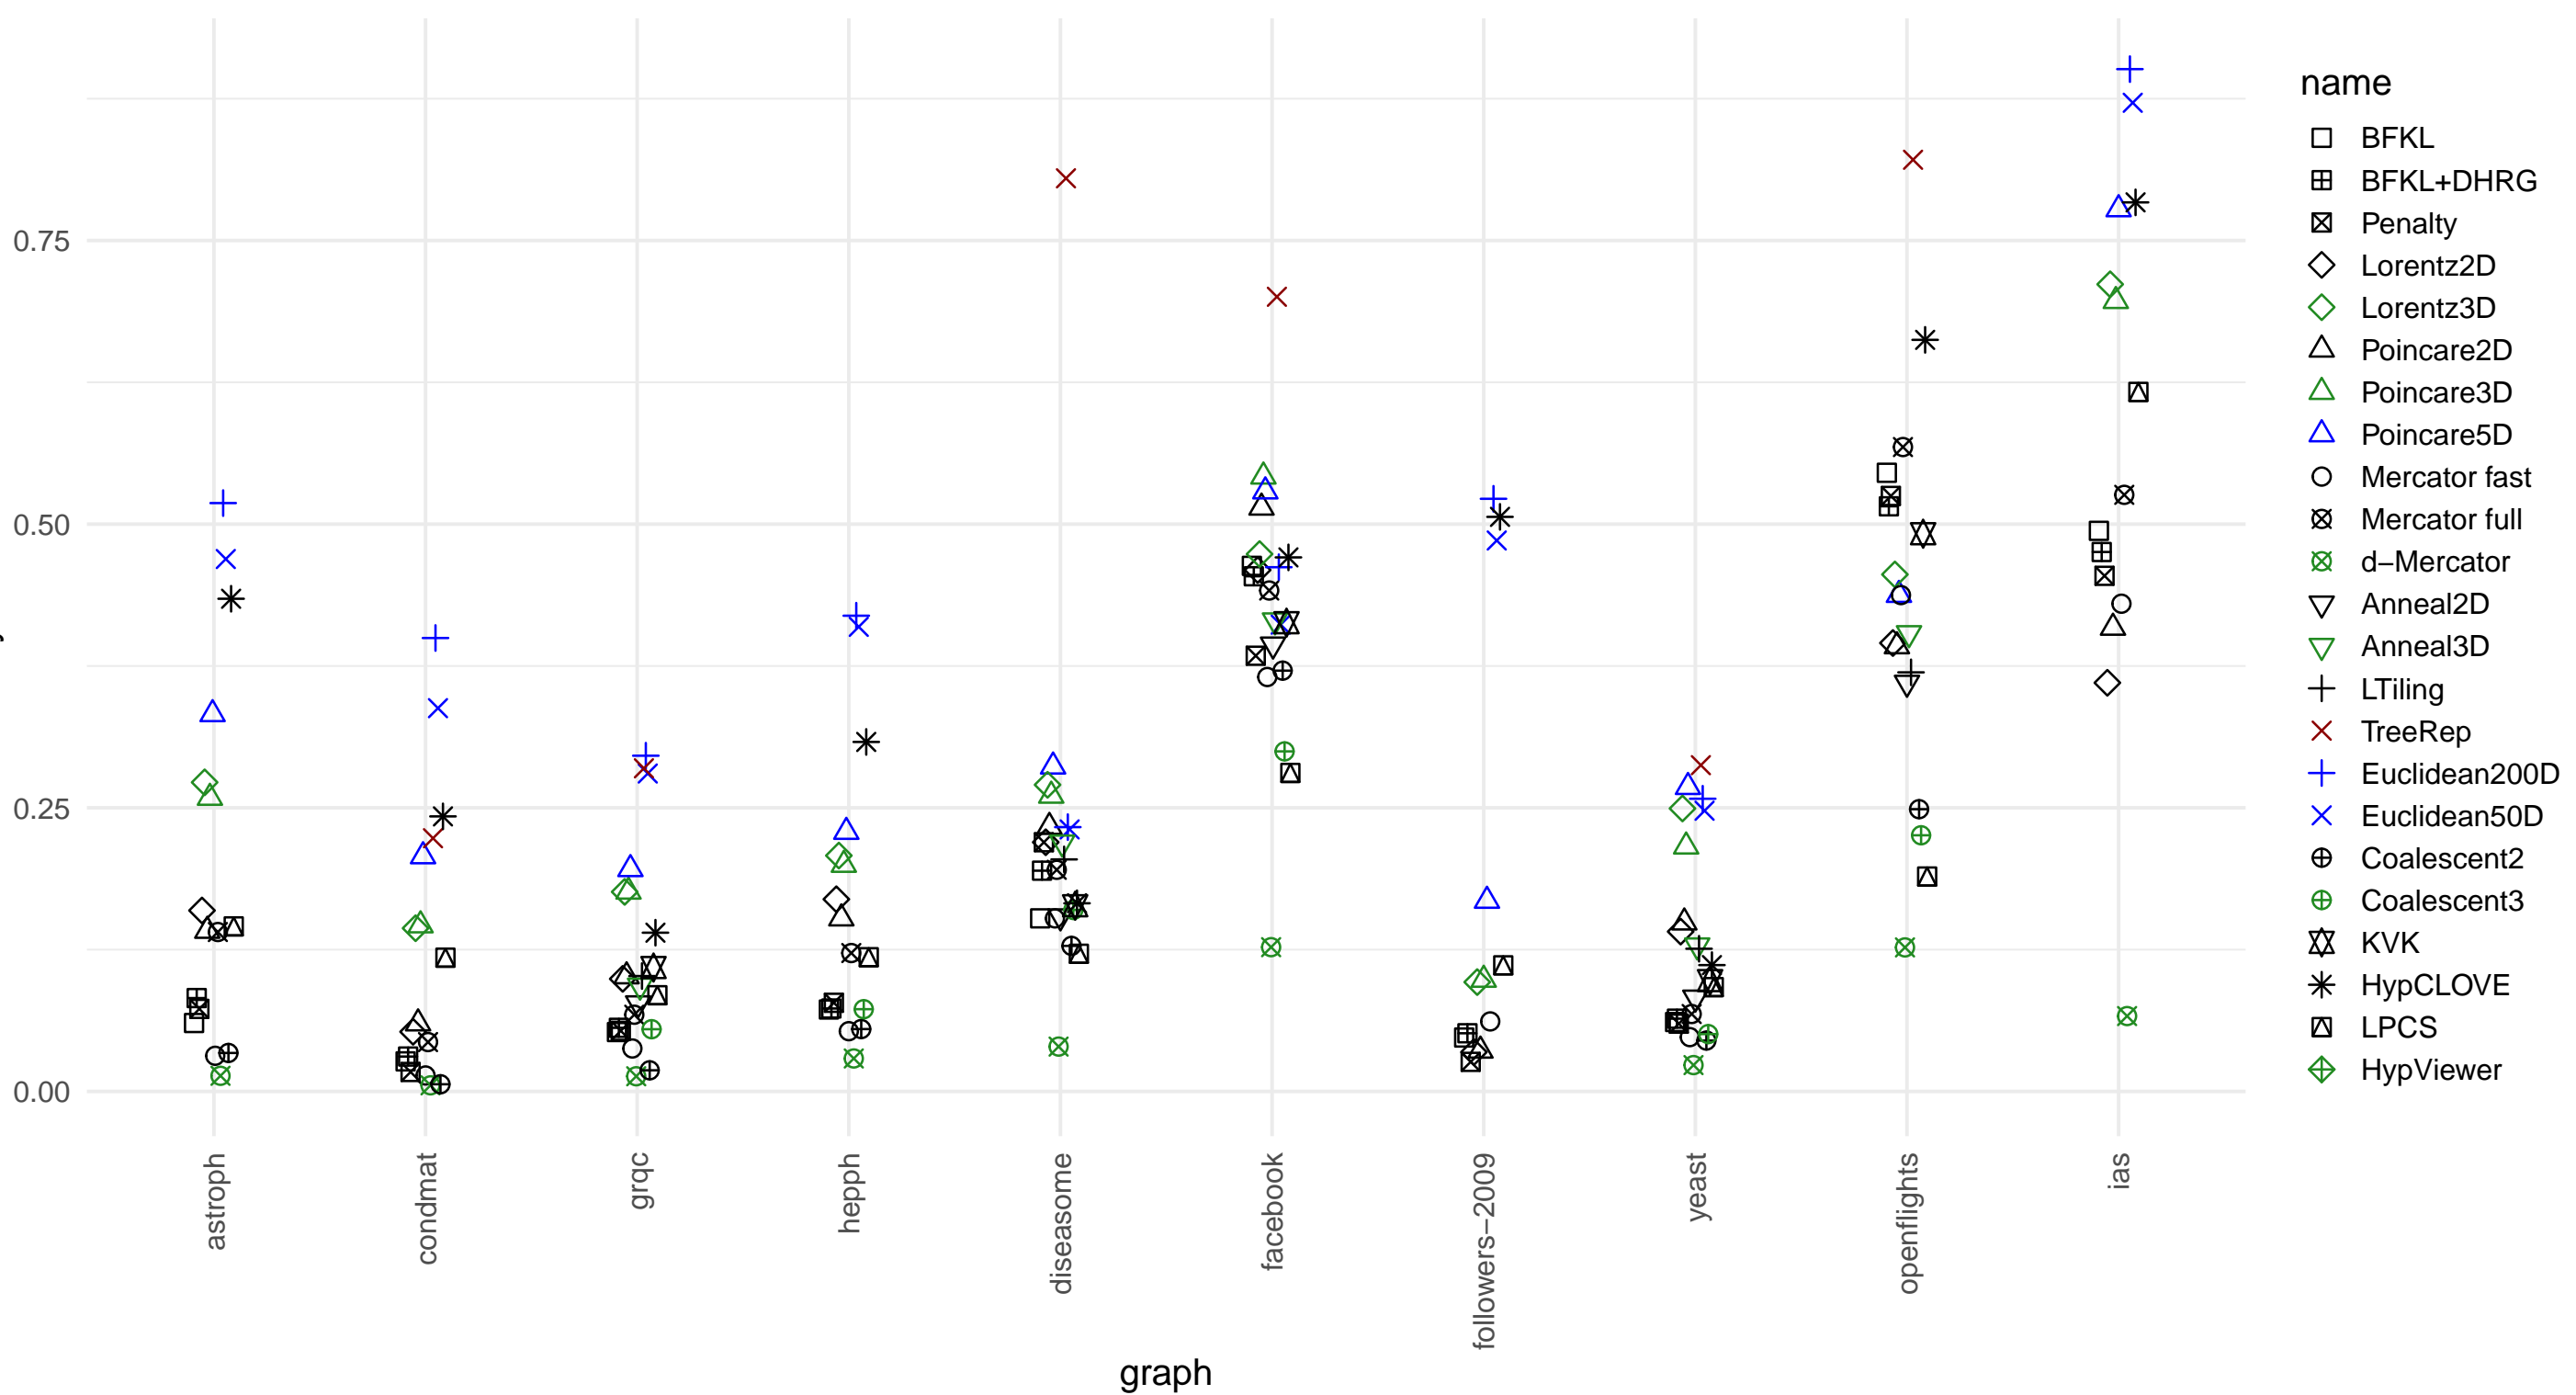

Supplement: supplementary_material [file real-world_success.pdf › bridging/tables/real-world_success.pdf]

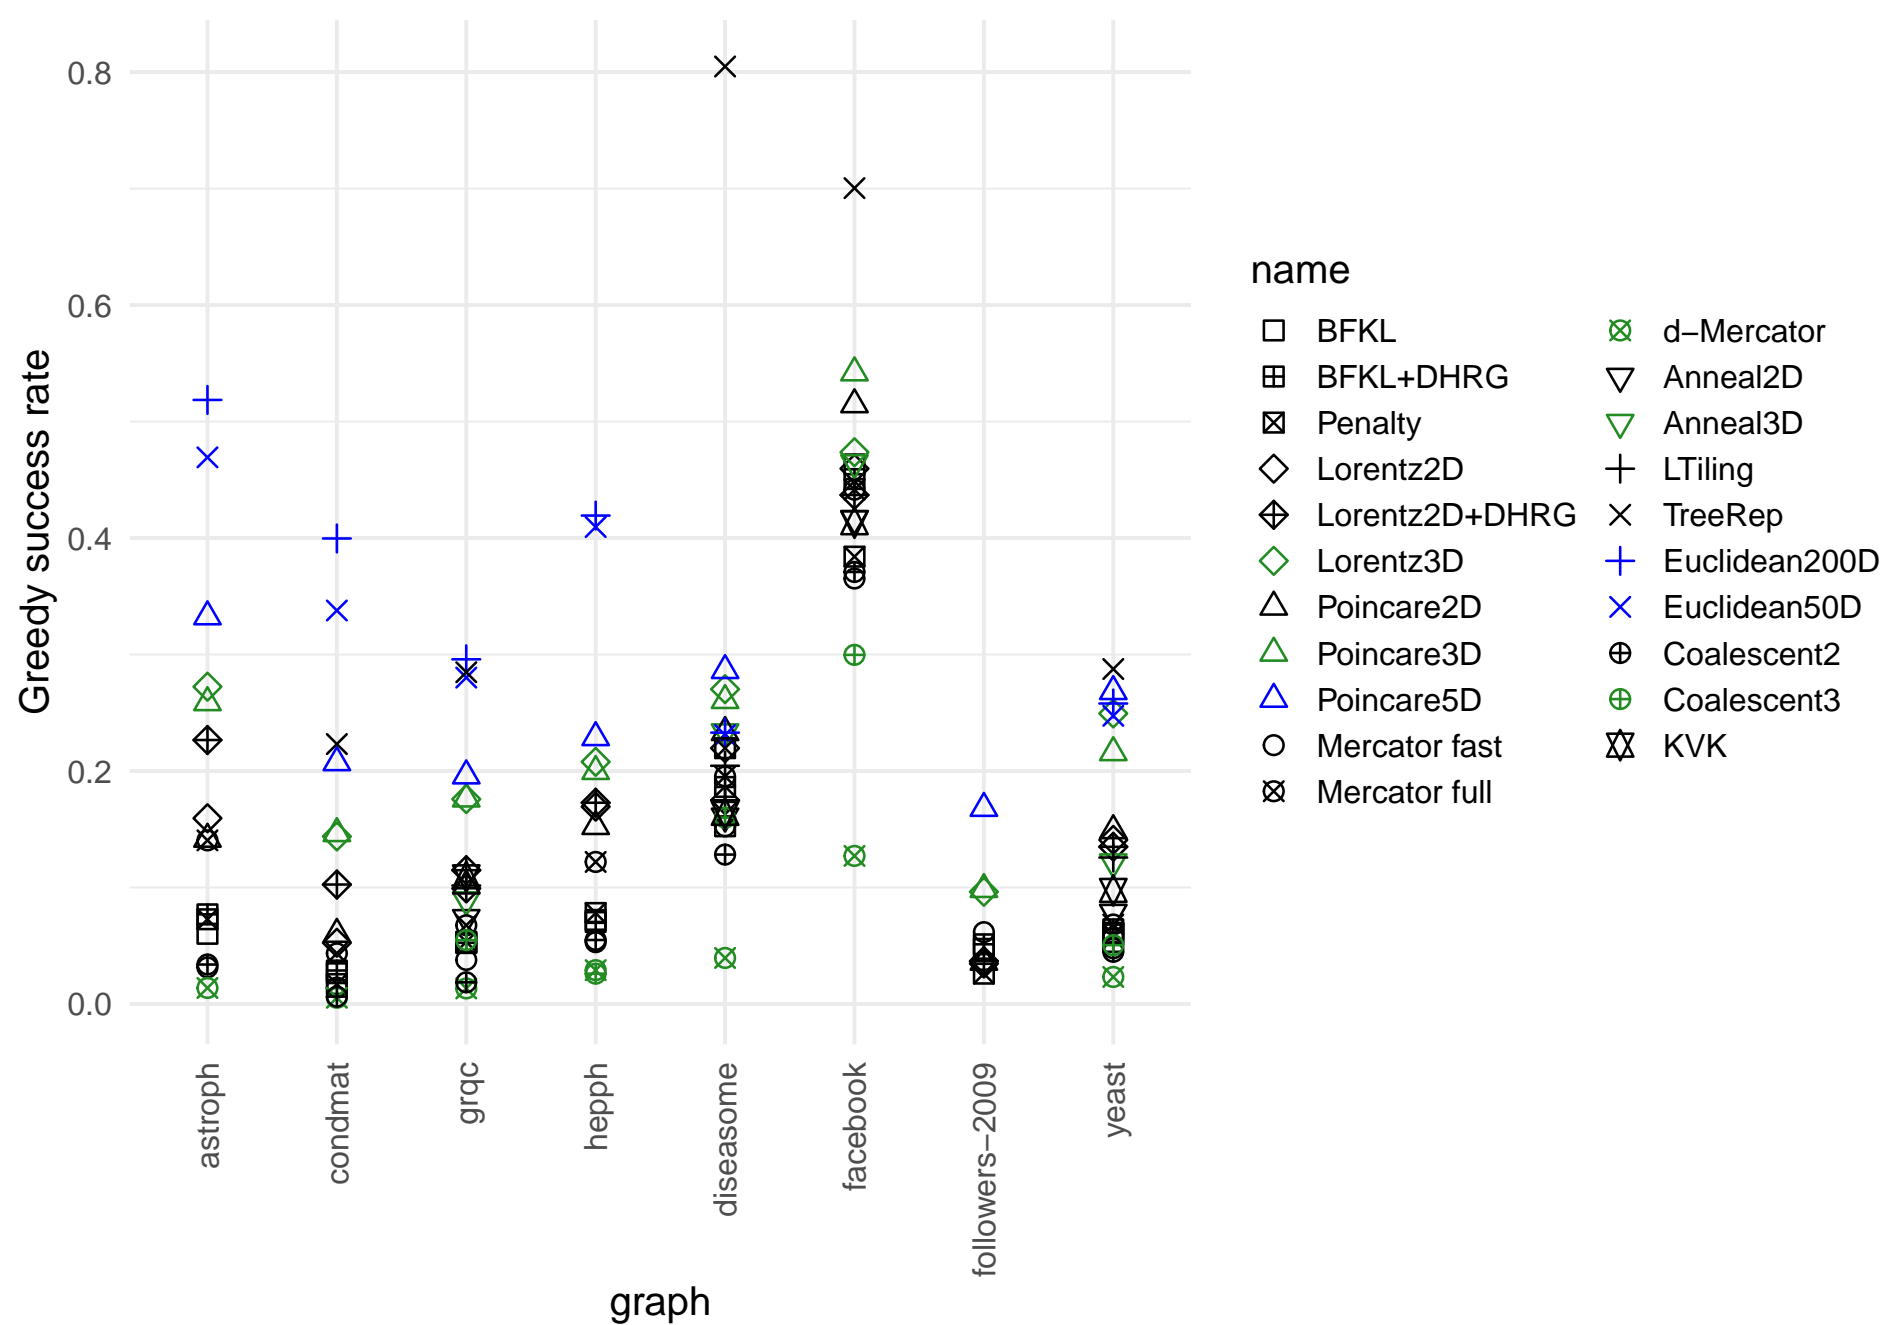

Supplement: supplementary_material [file real-world_success.pdf › bridging/tables/real-world_success.pdf]

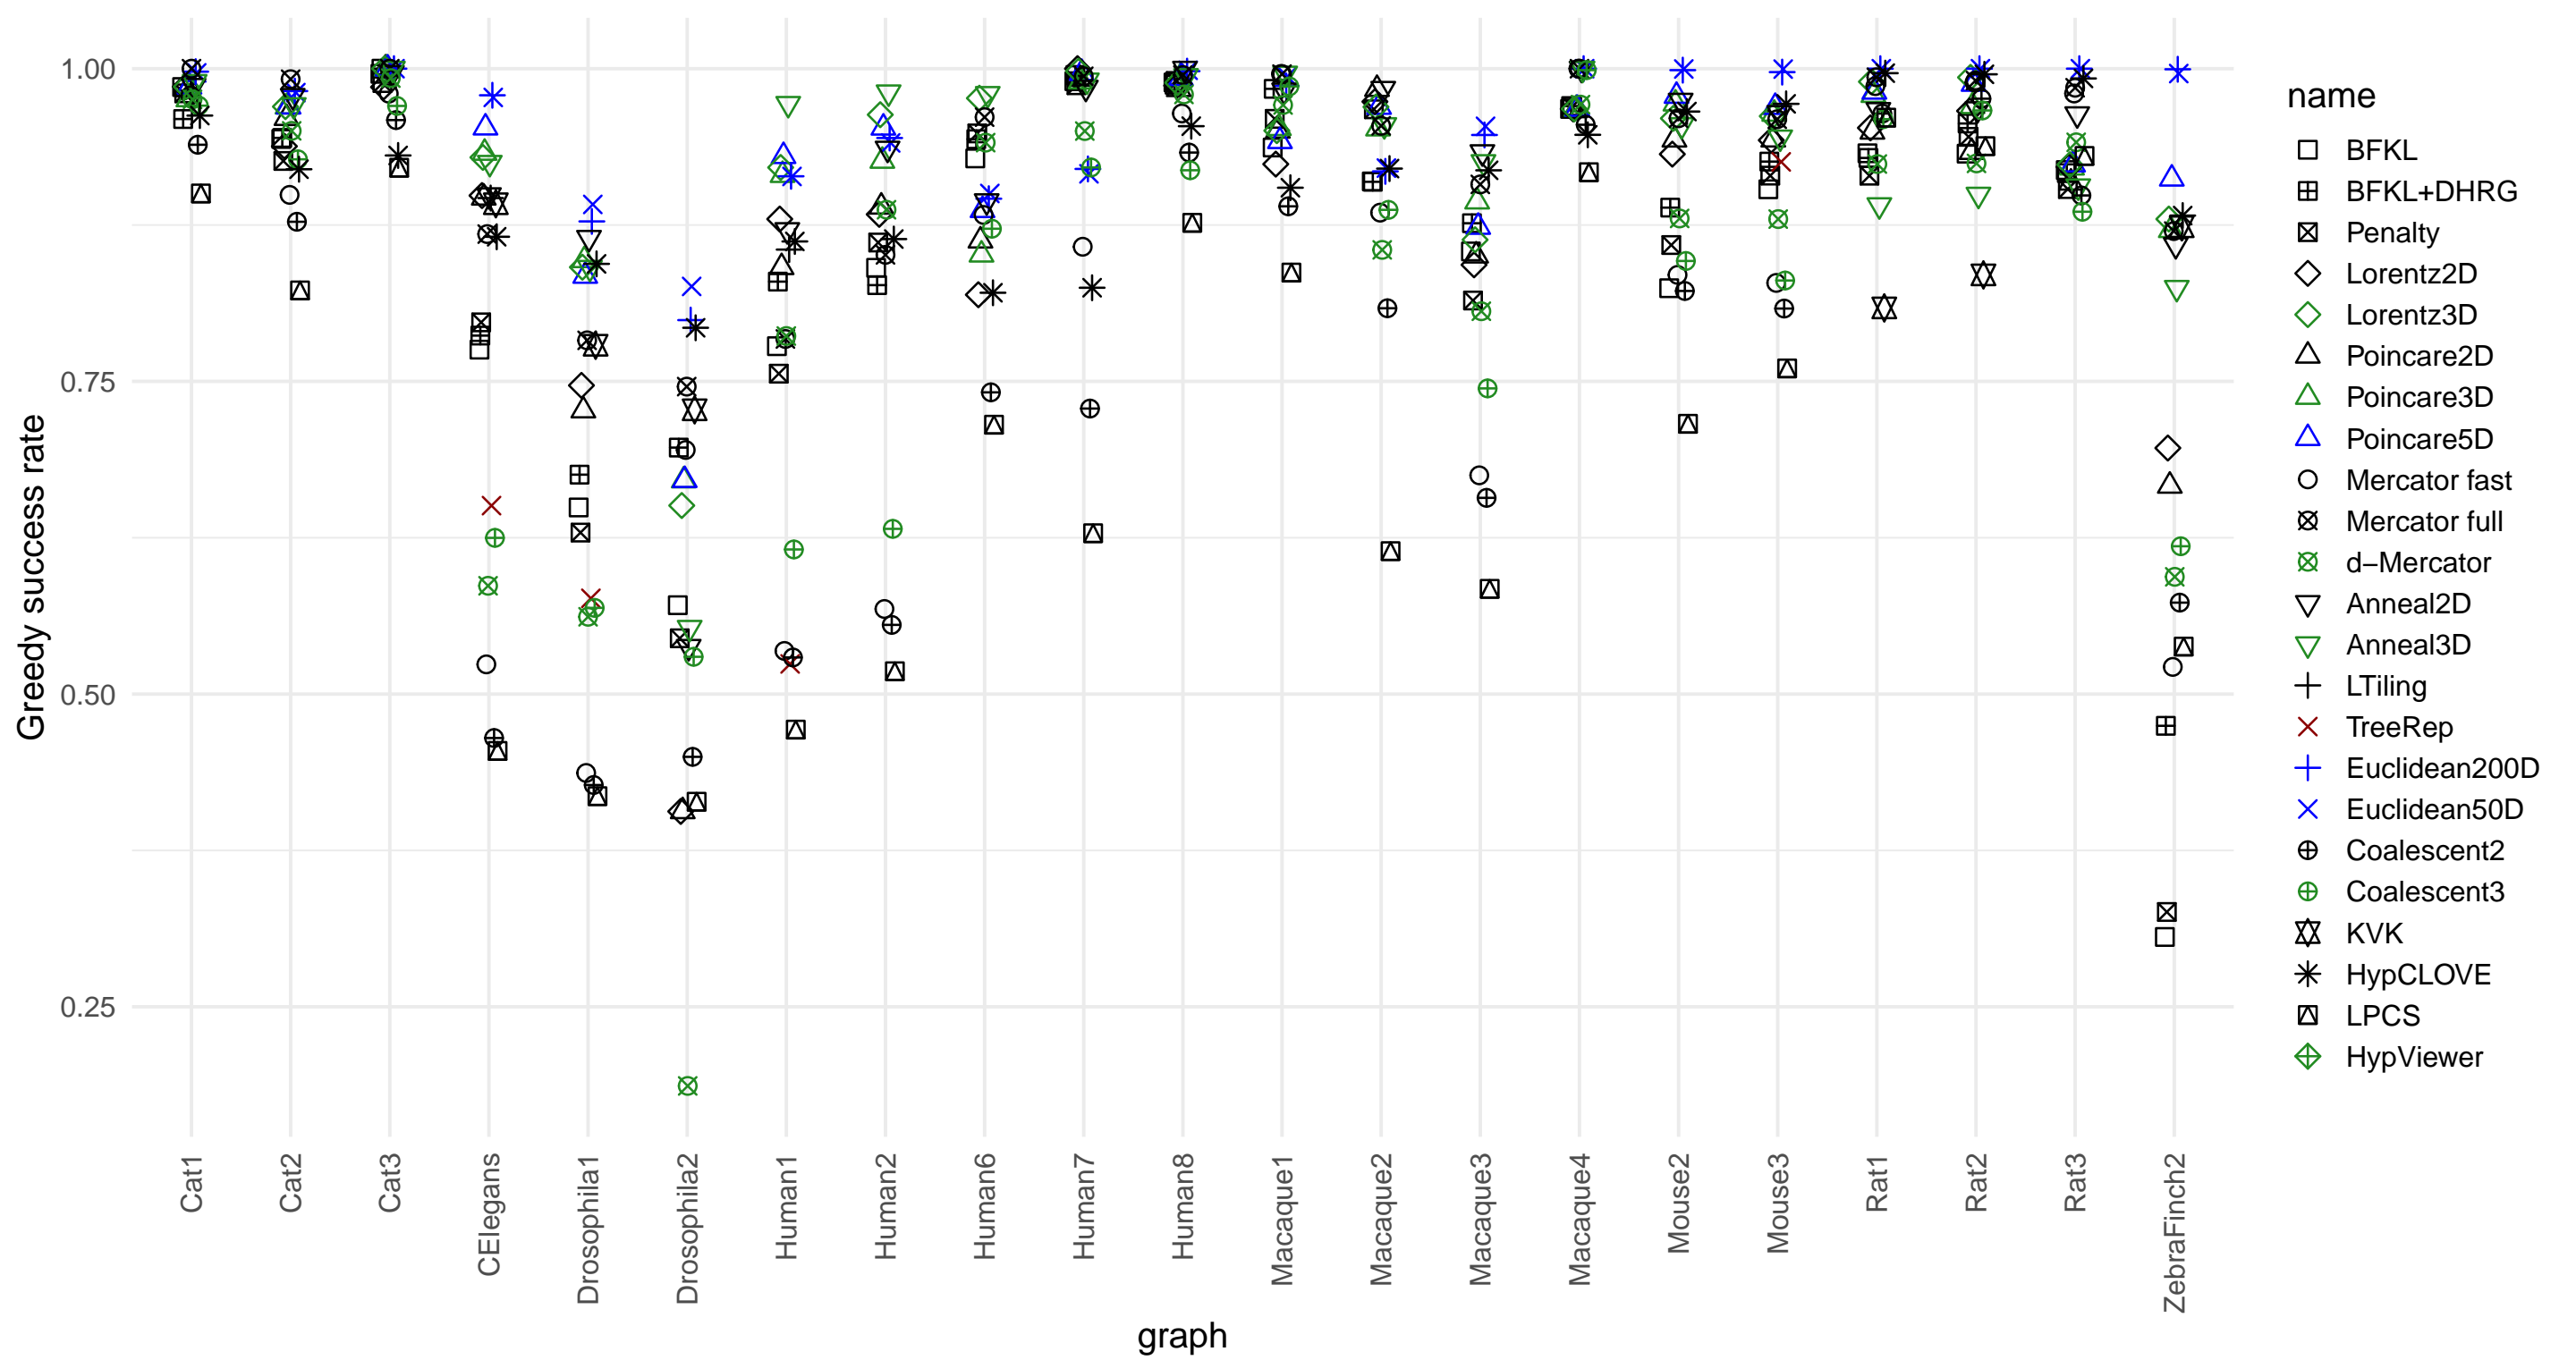

Supplement: supplementary_material [file real-world_success_conn.pdf › bridging/tables/real-world_success_conn.pdf]

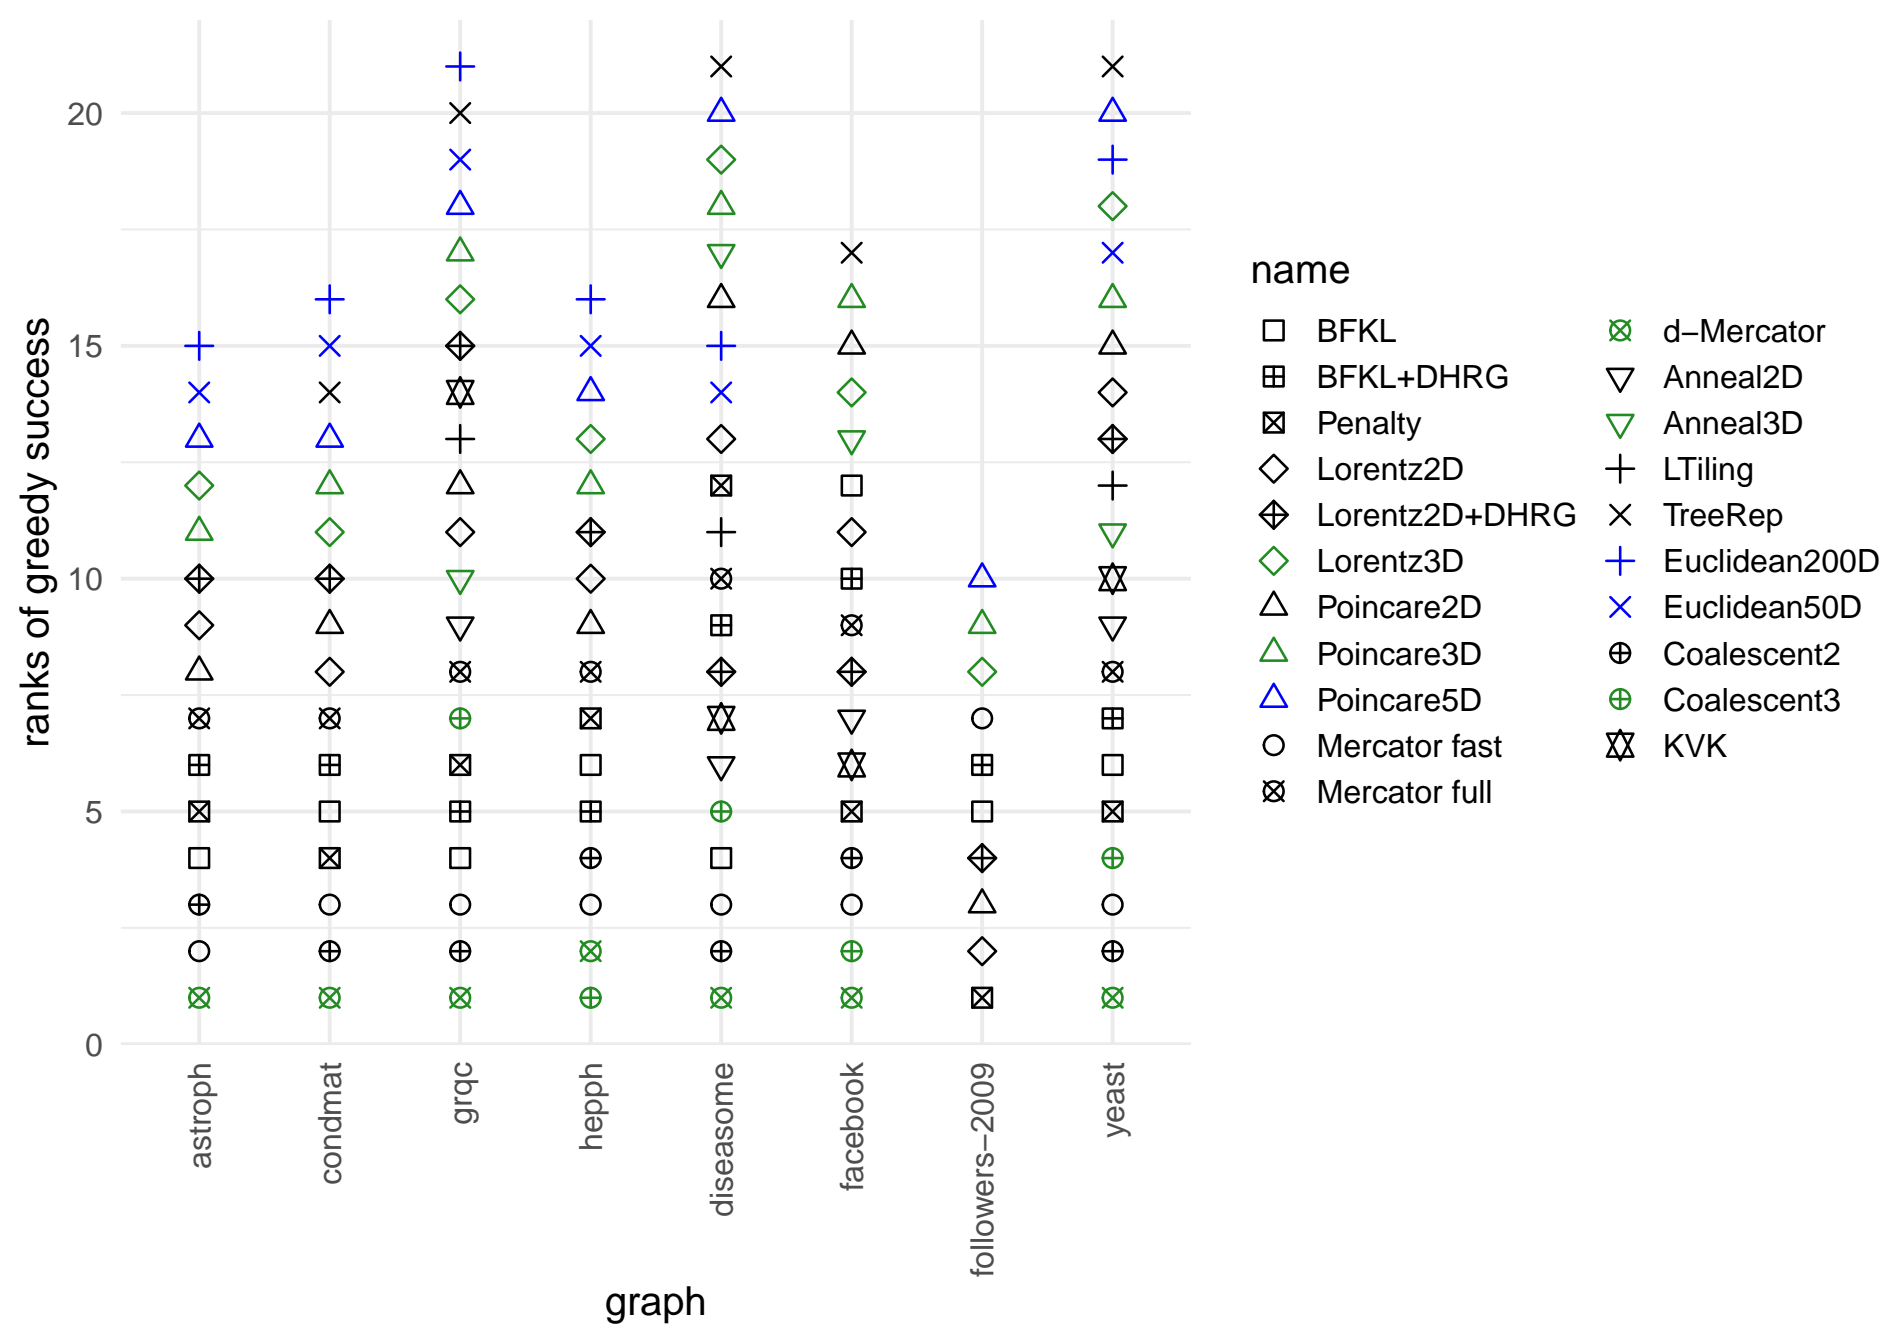

Supplement: supplementary_material [file real-world_success_ranking.pdf › bridging/tables/real-world_success_ranking.pdf]

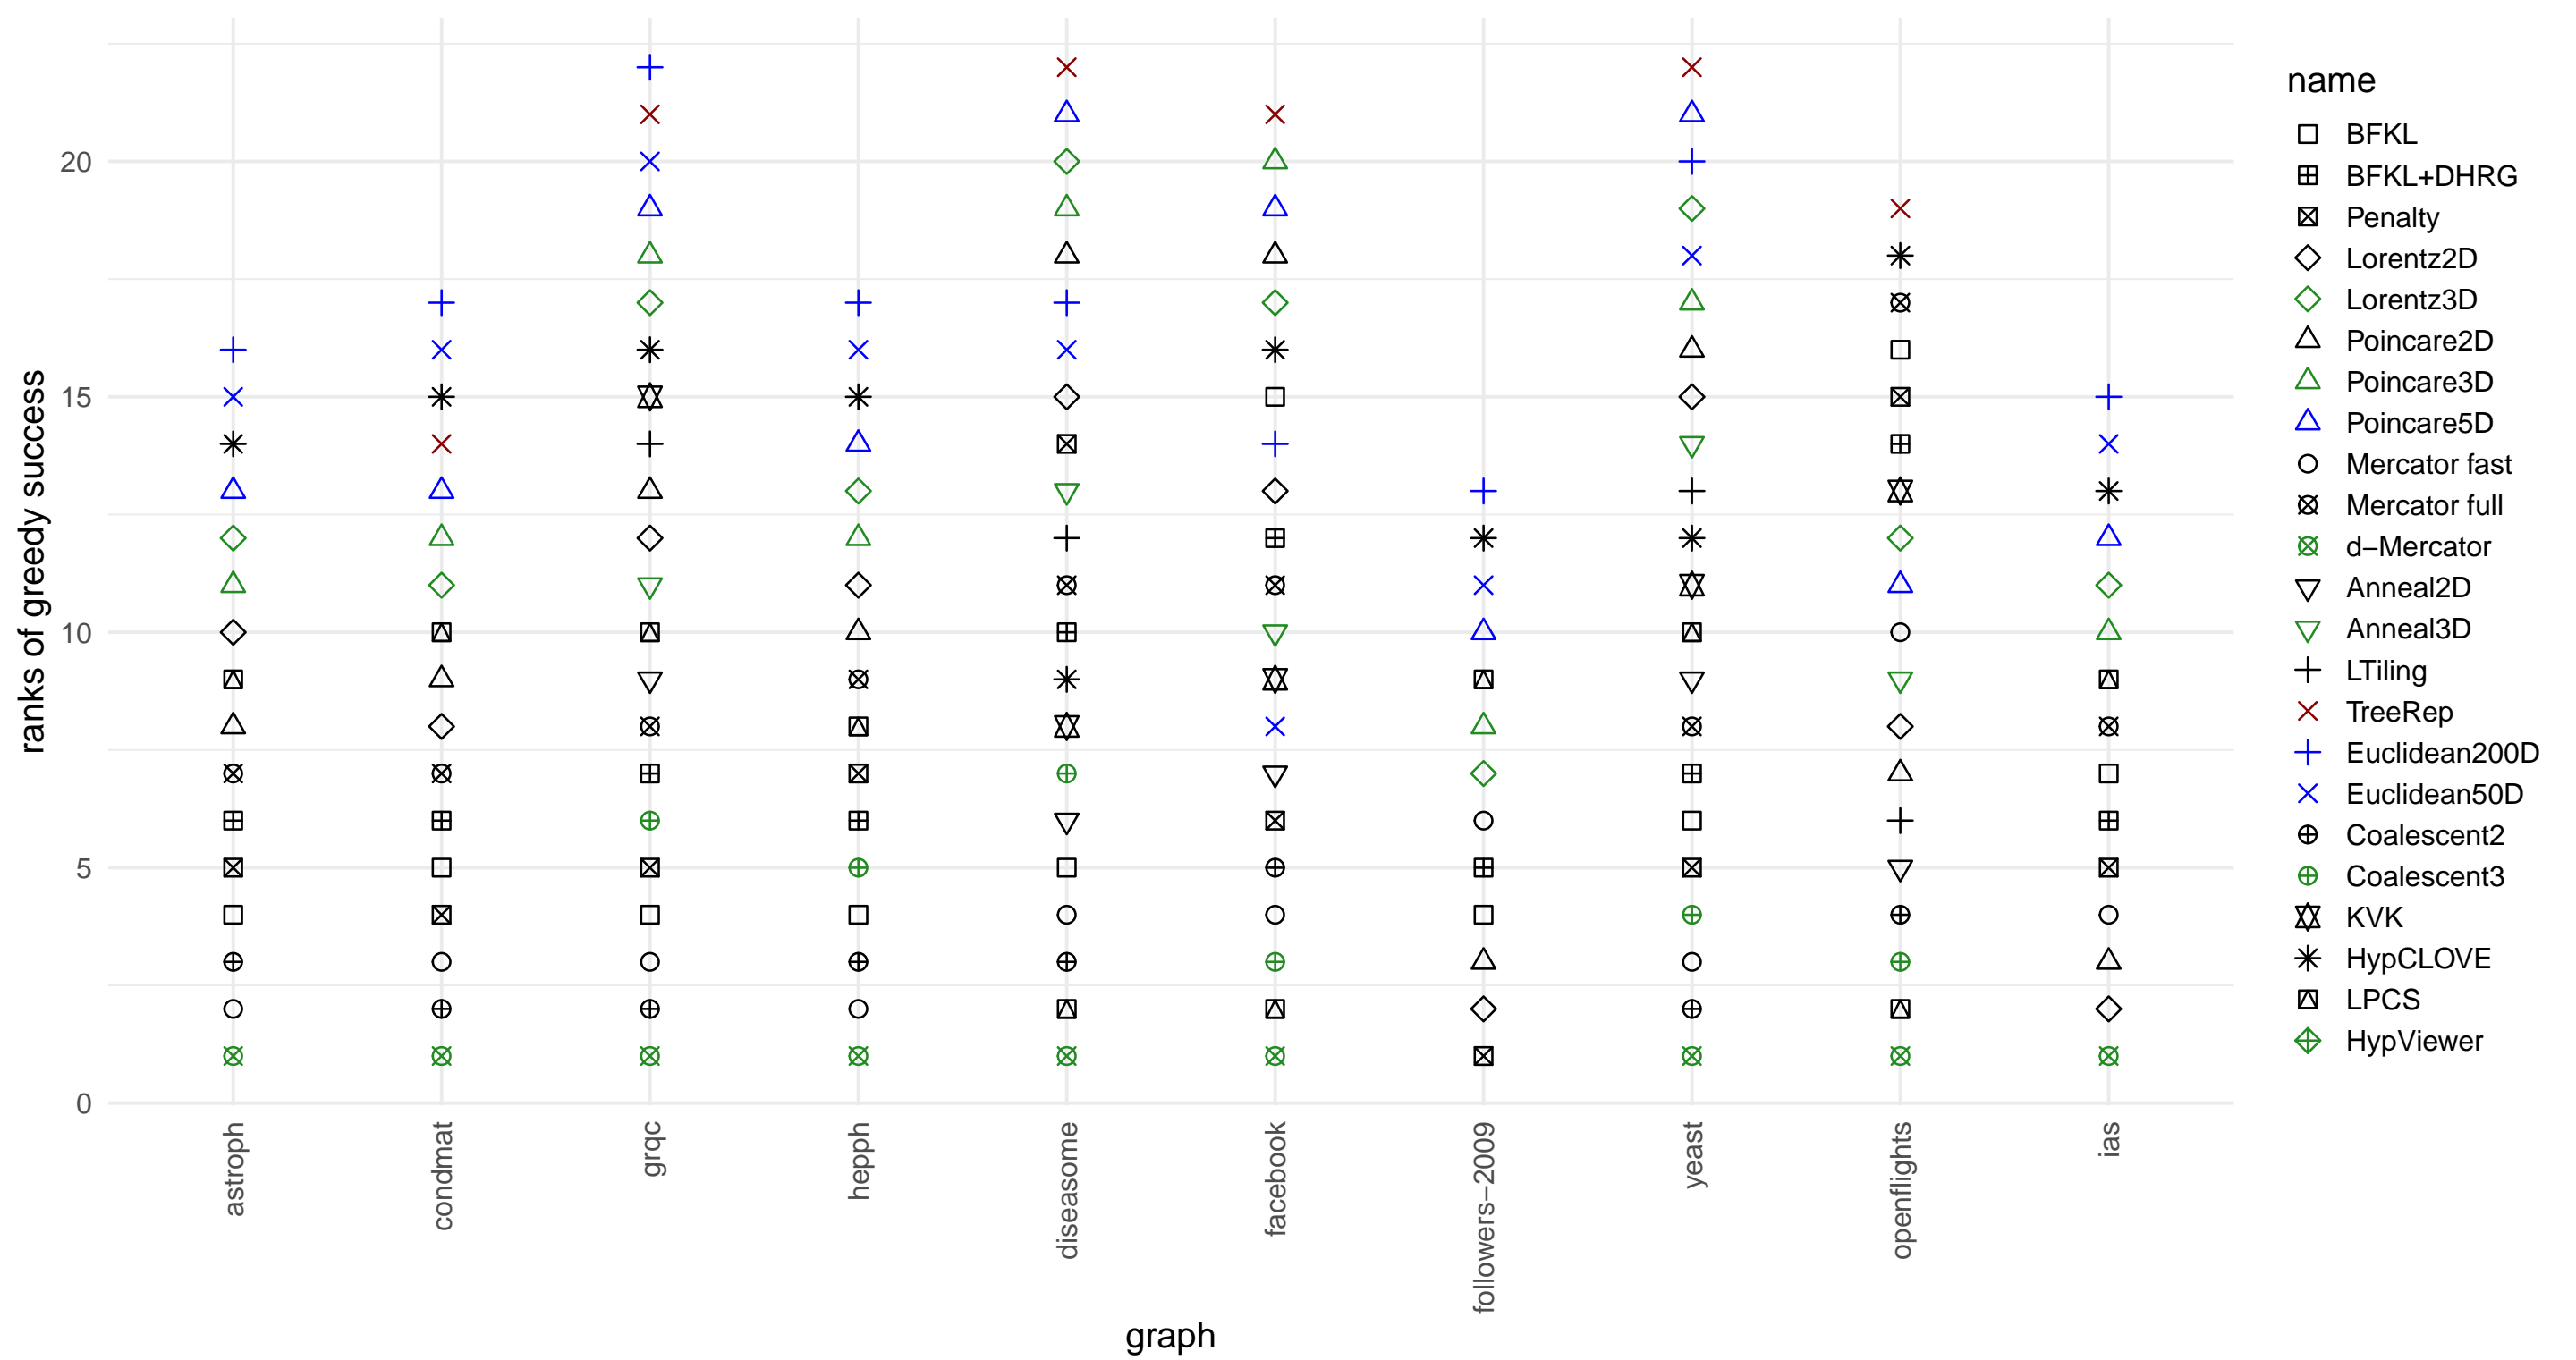

Supplement: supplementary_material [file real-world_success_ranking.pdf › bridging/tables/real-world_success_ranking.pdf]

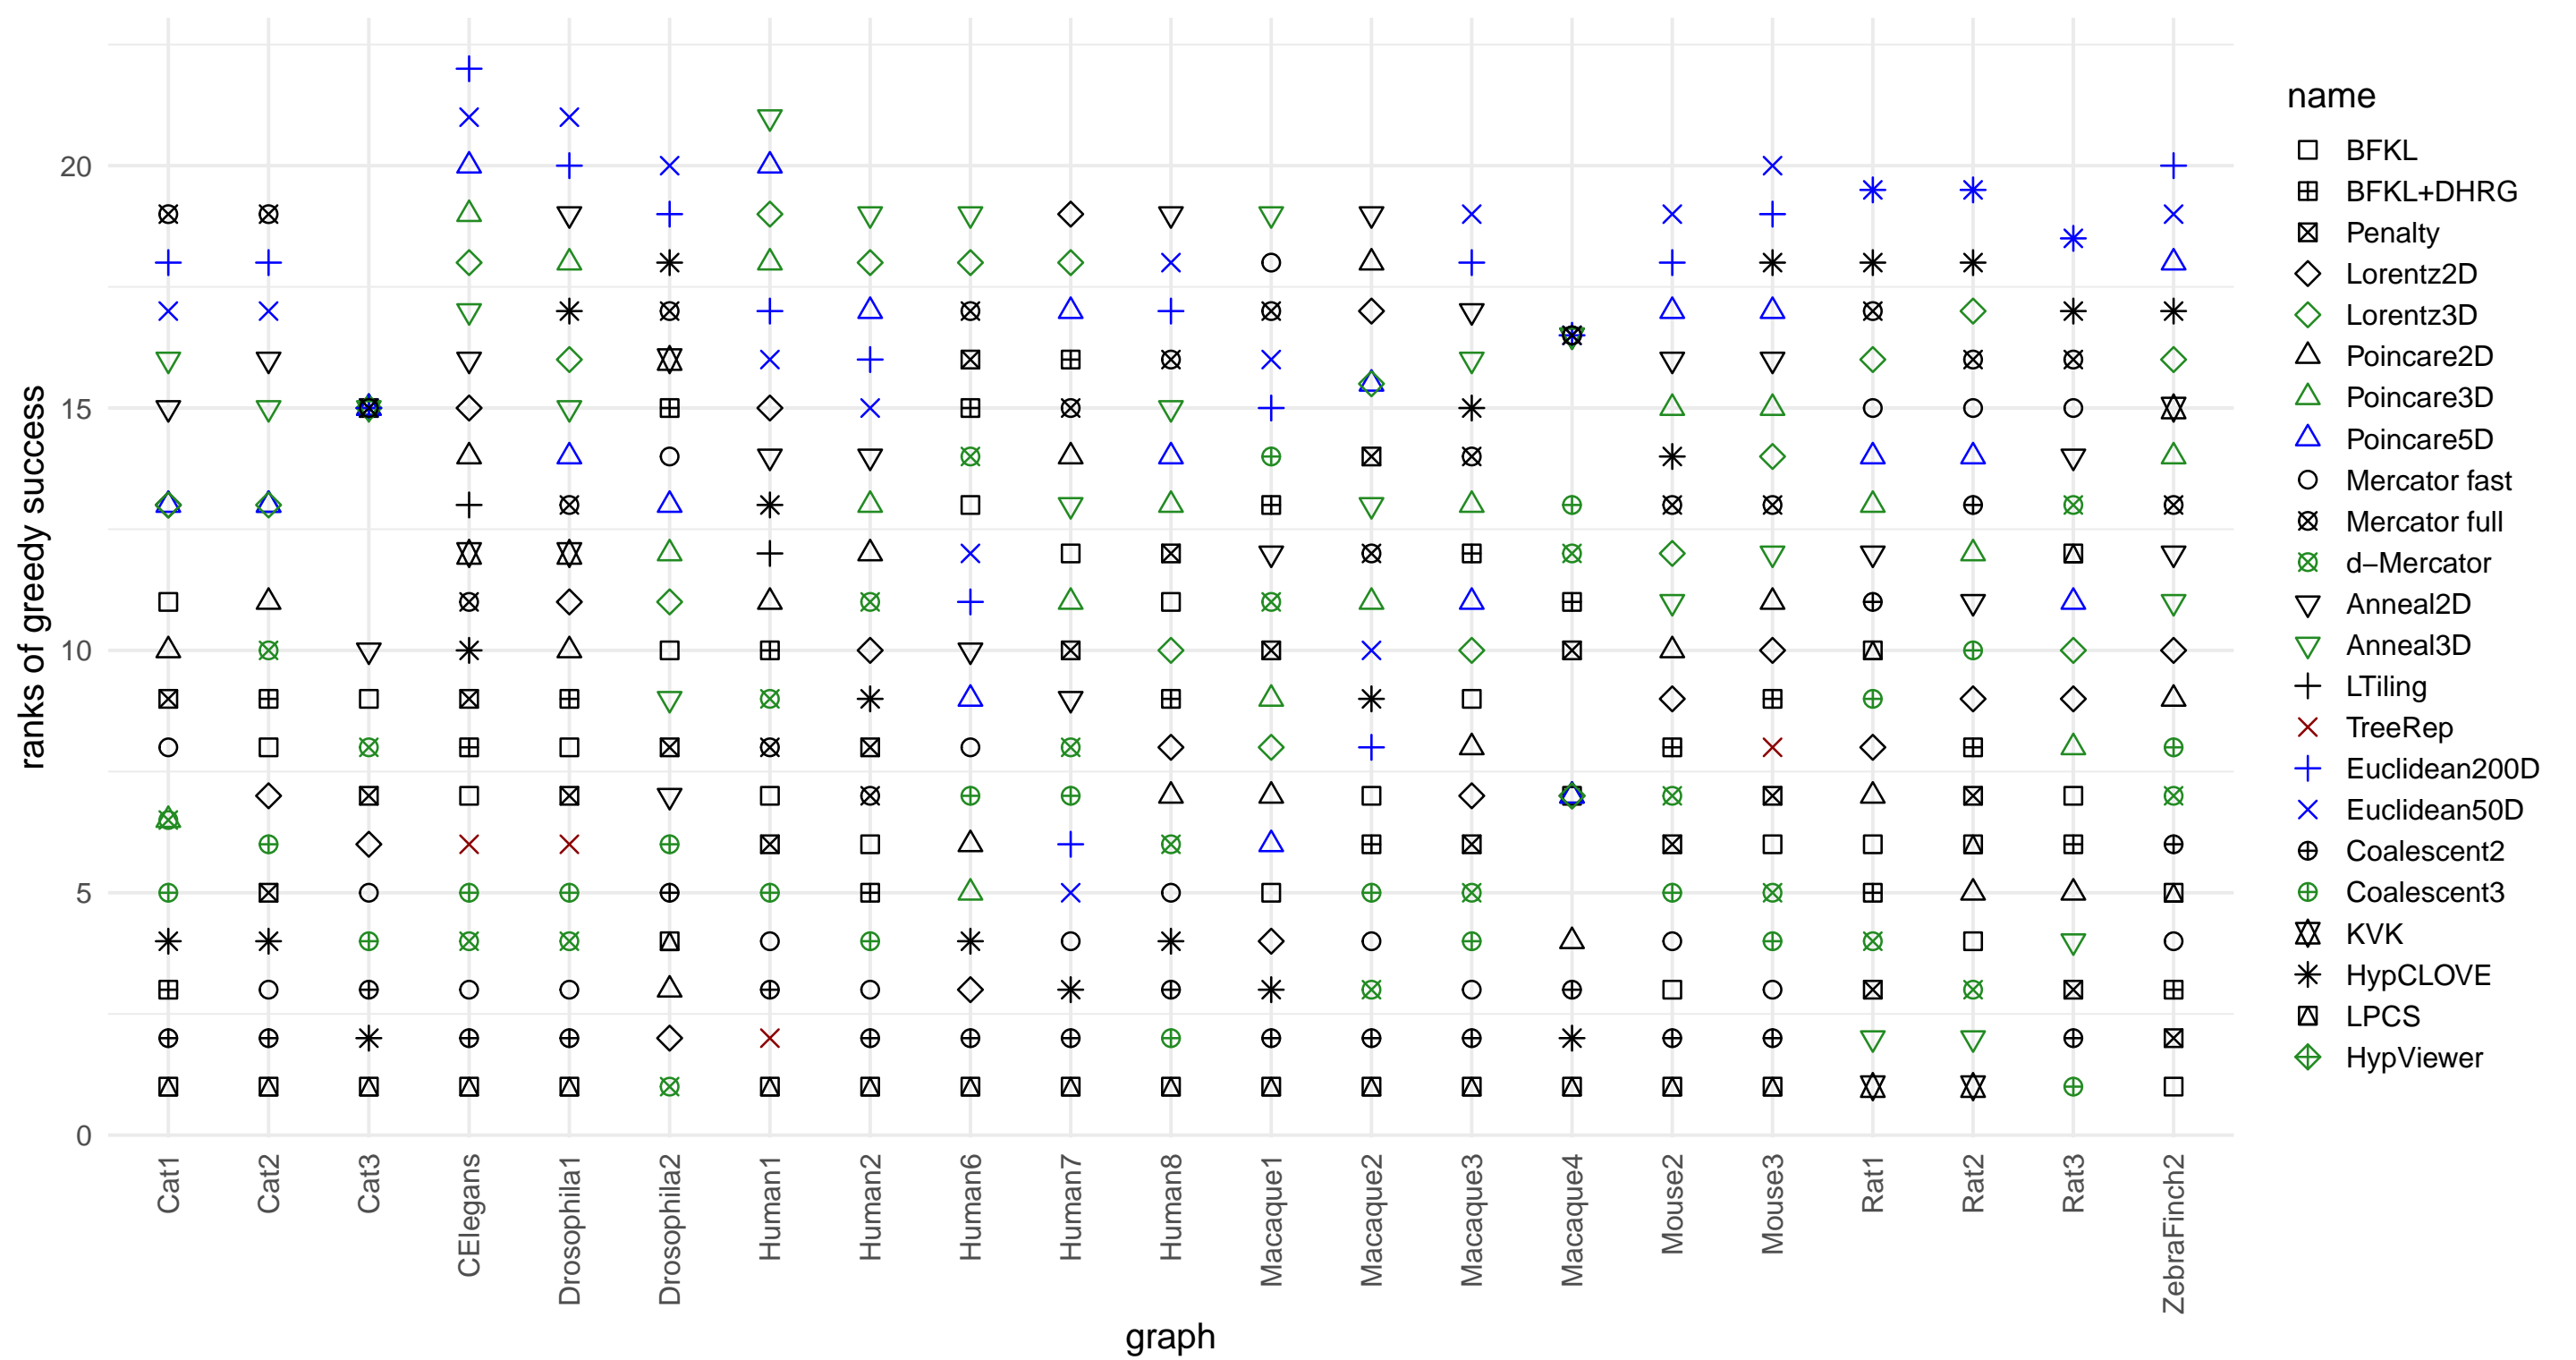

Supplement: supplementary_material [file real-world_success_ranking_conn.pdf › bridging/tables/real-world_success_ranking_conn.pdf]

ranks of greedy success

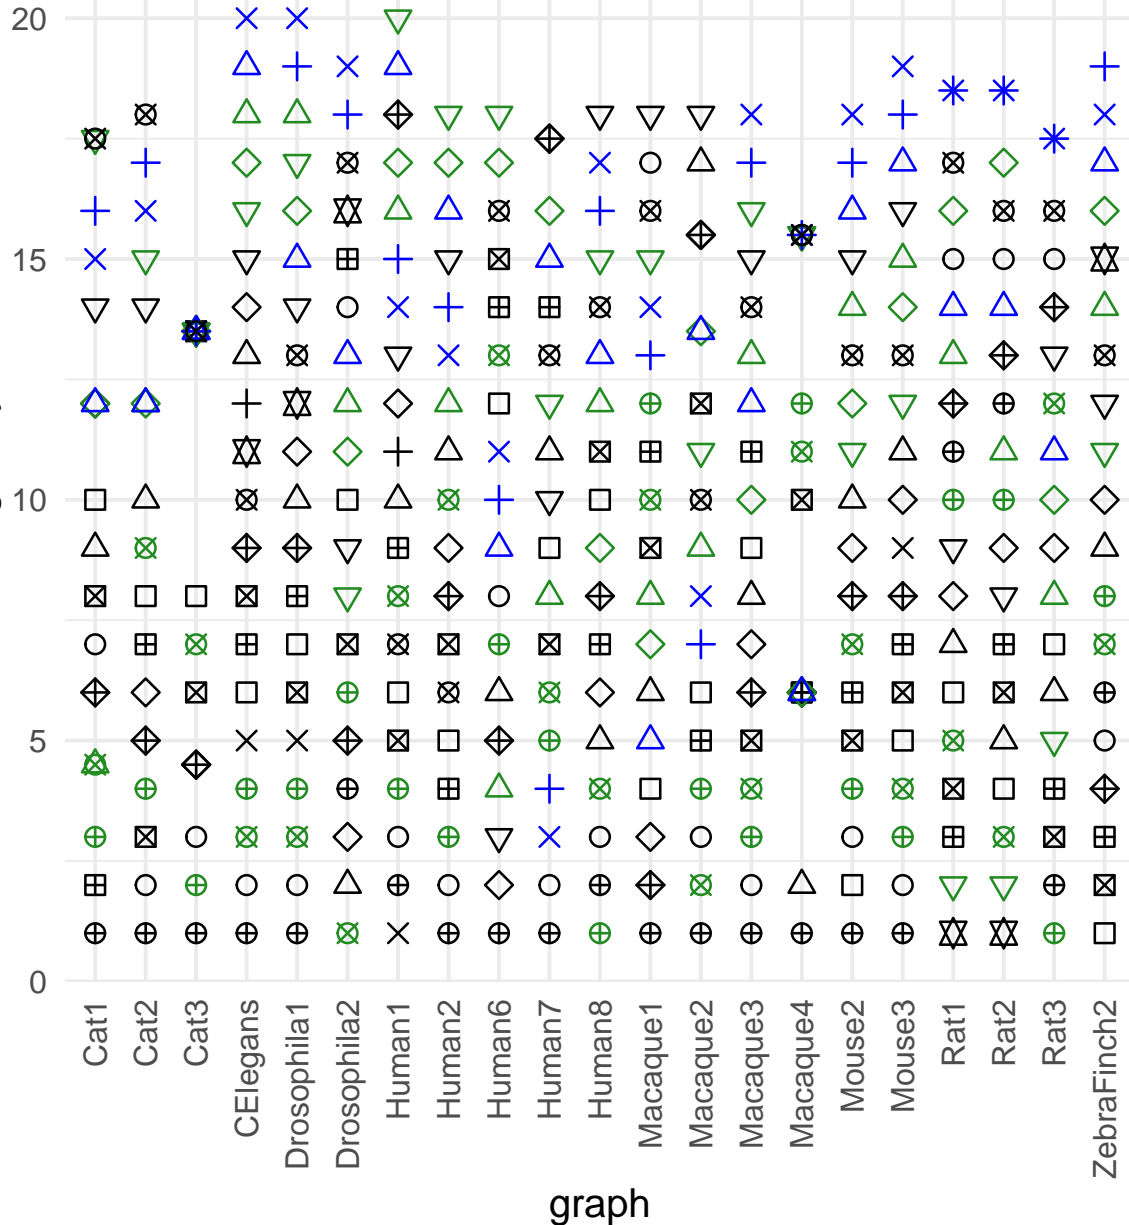

Supplement: supplementary_material [file real-world_success_ranking_conn.pdf › bridging/tables/real-world_success_ranking_conn.pdf]

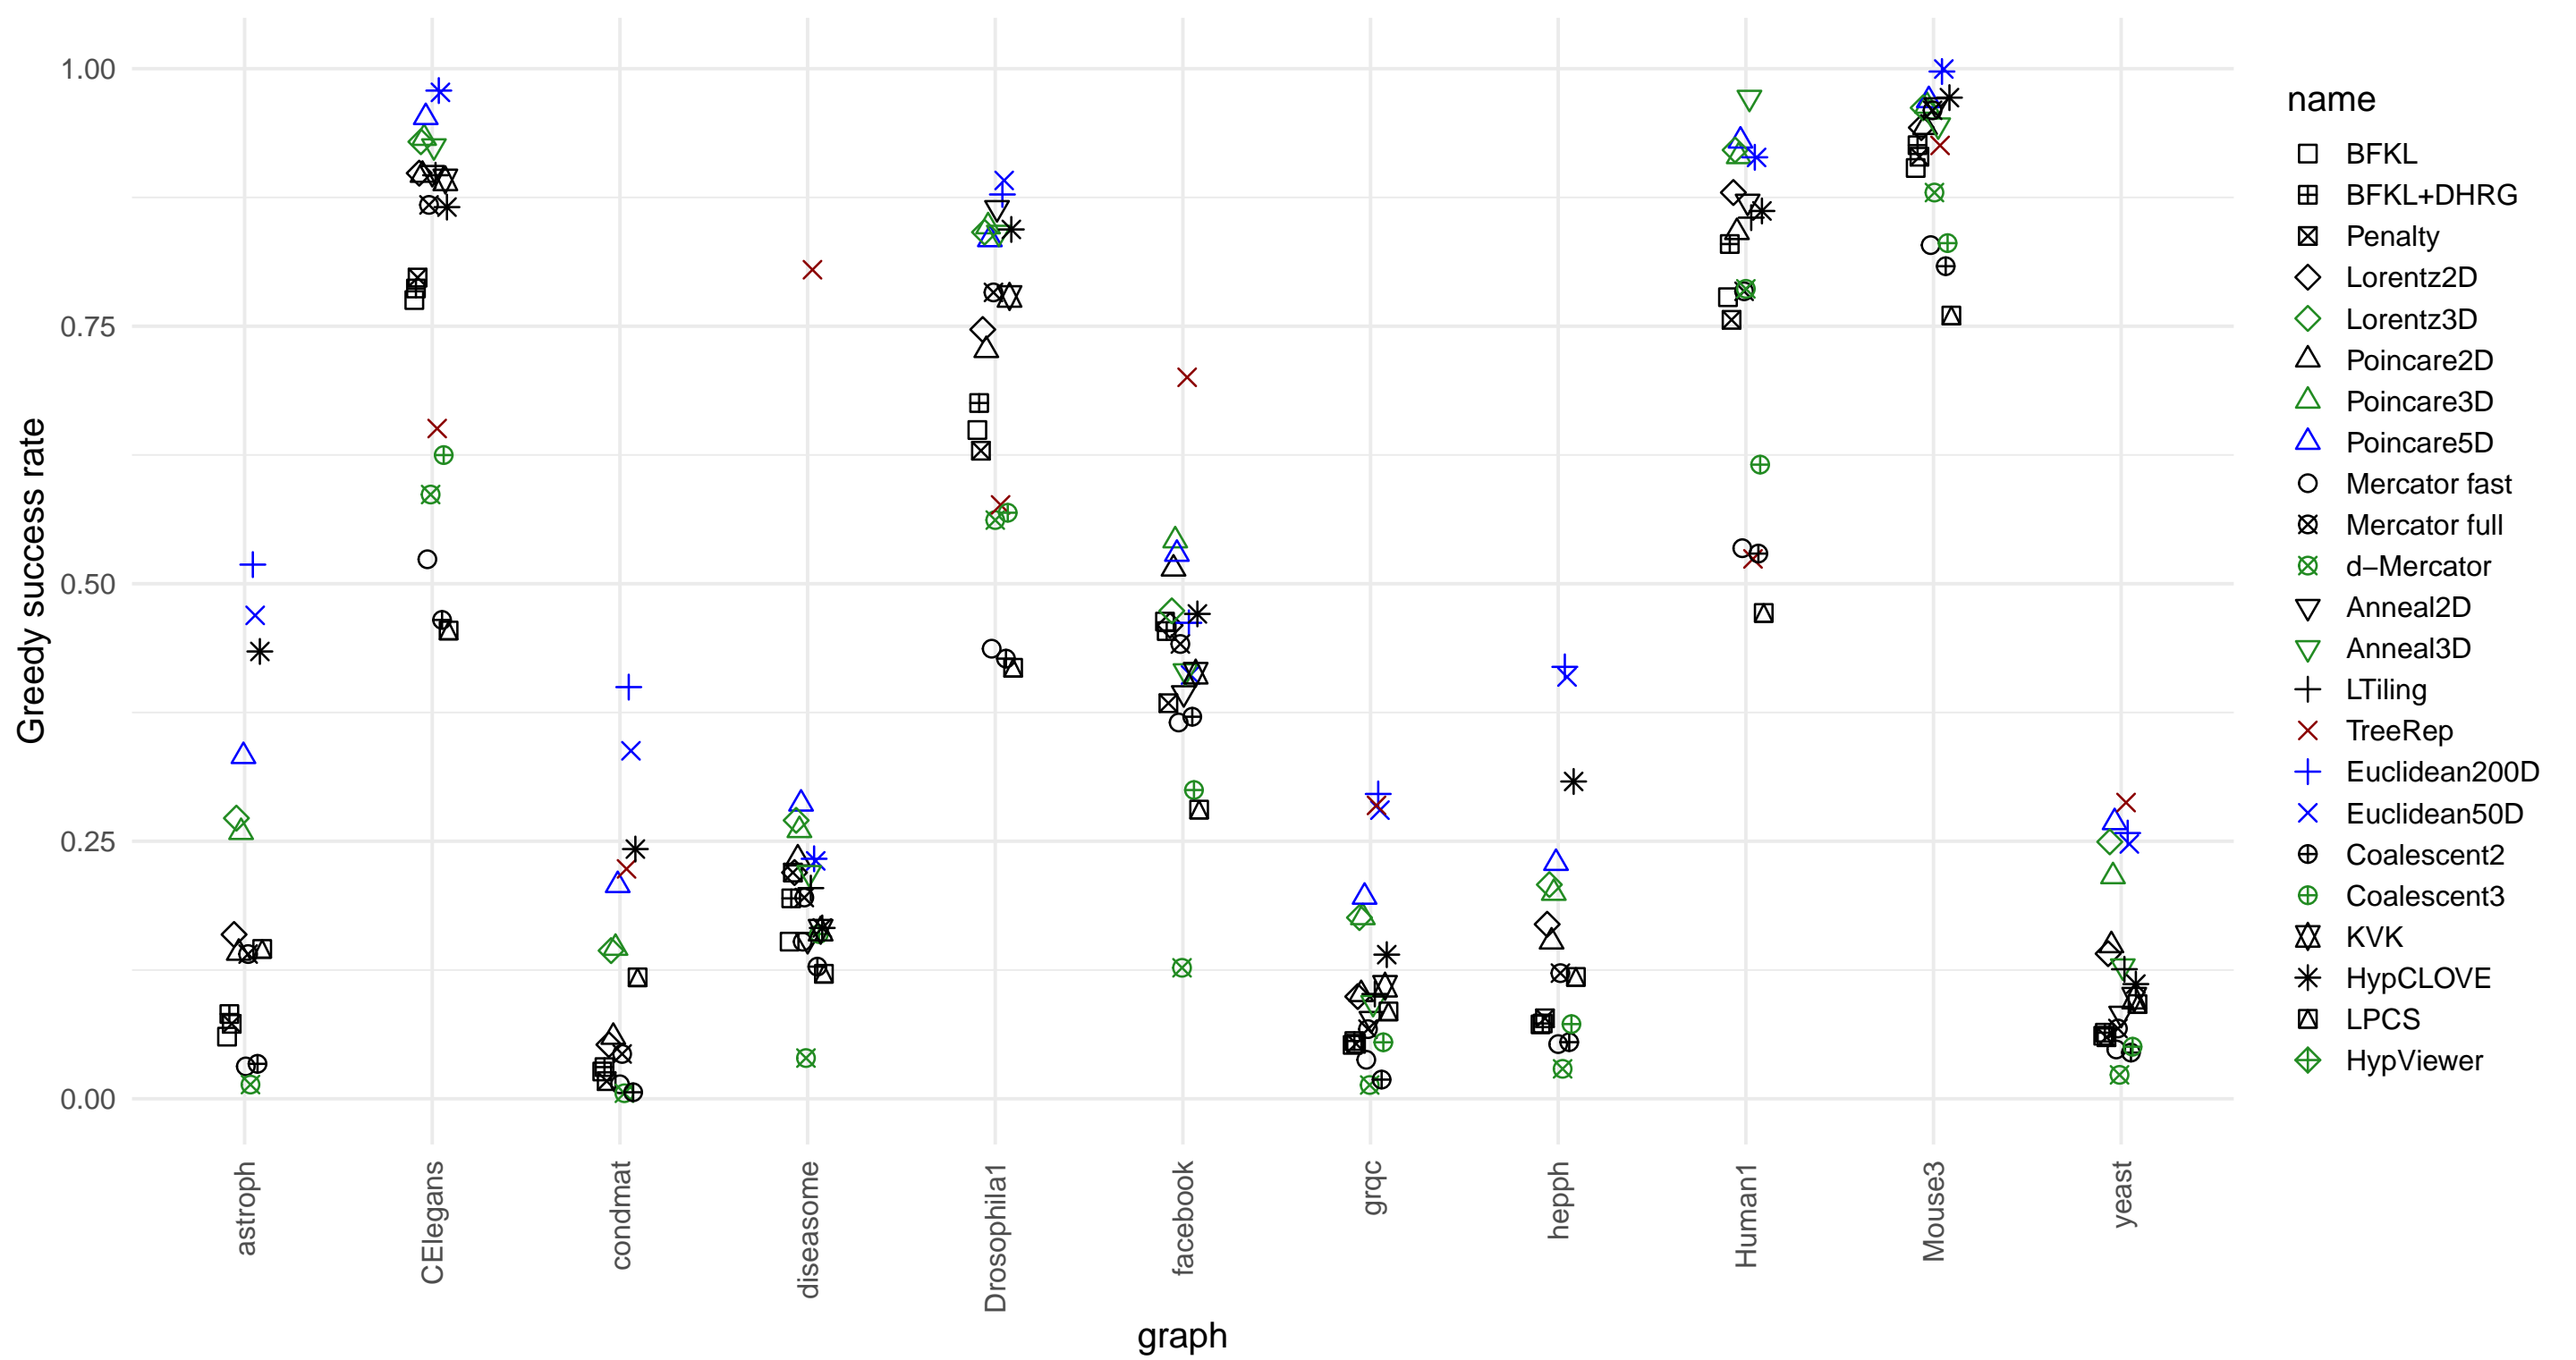

Supplement: supplementary_material [file real-world_success_short.pdf › bridging/tables/real-world_success_short.pdf]

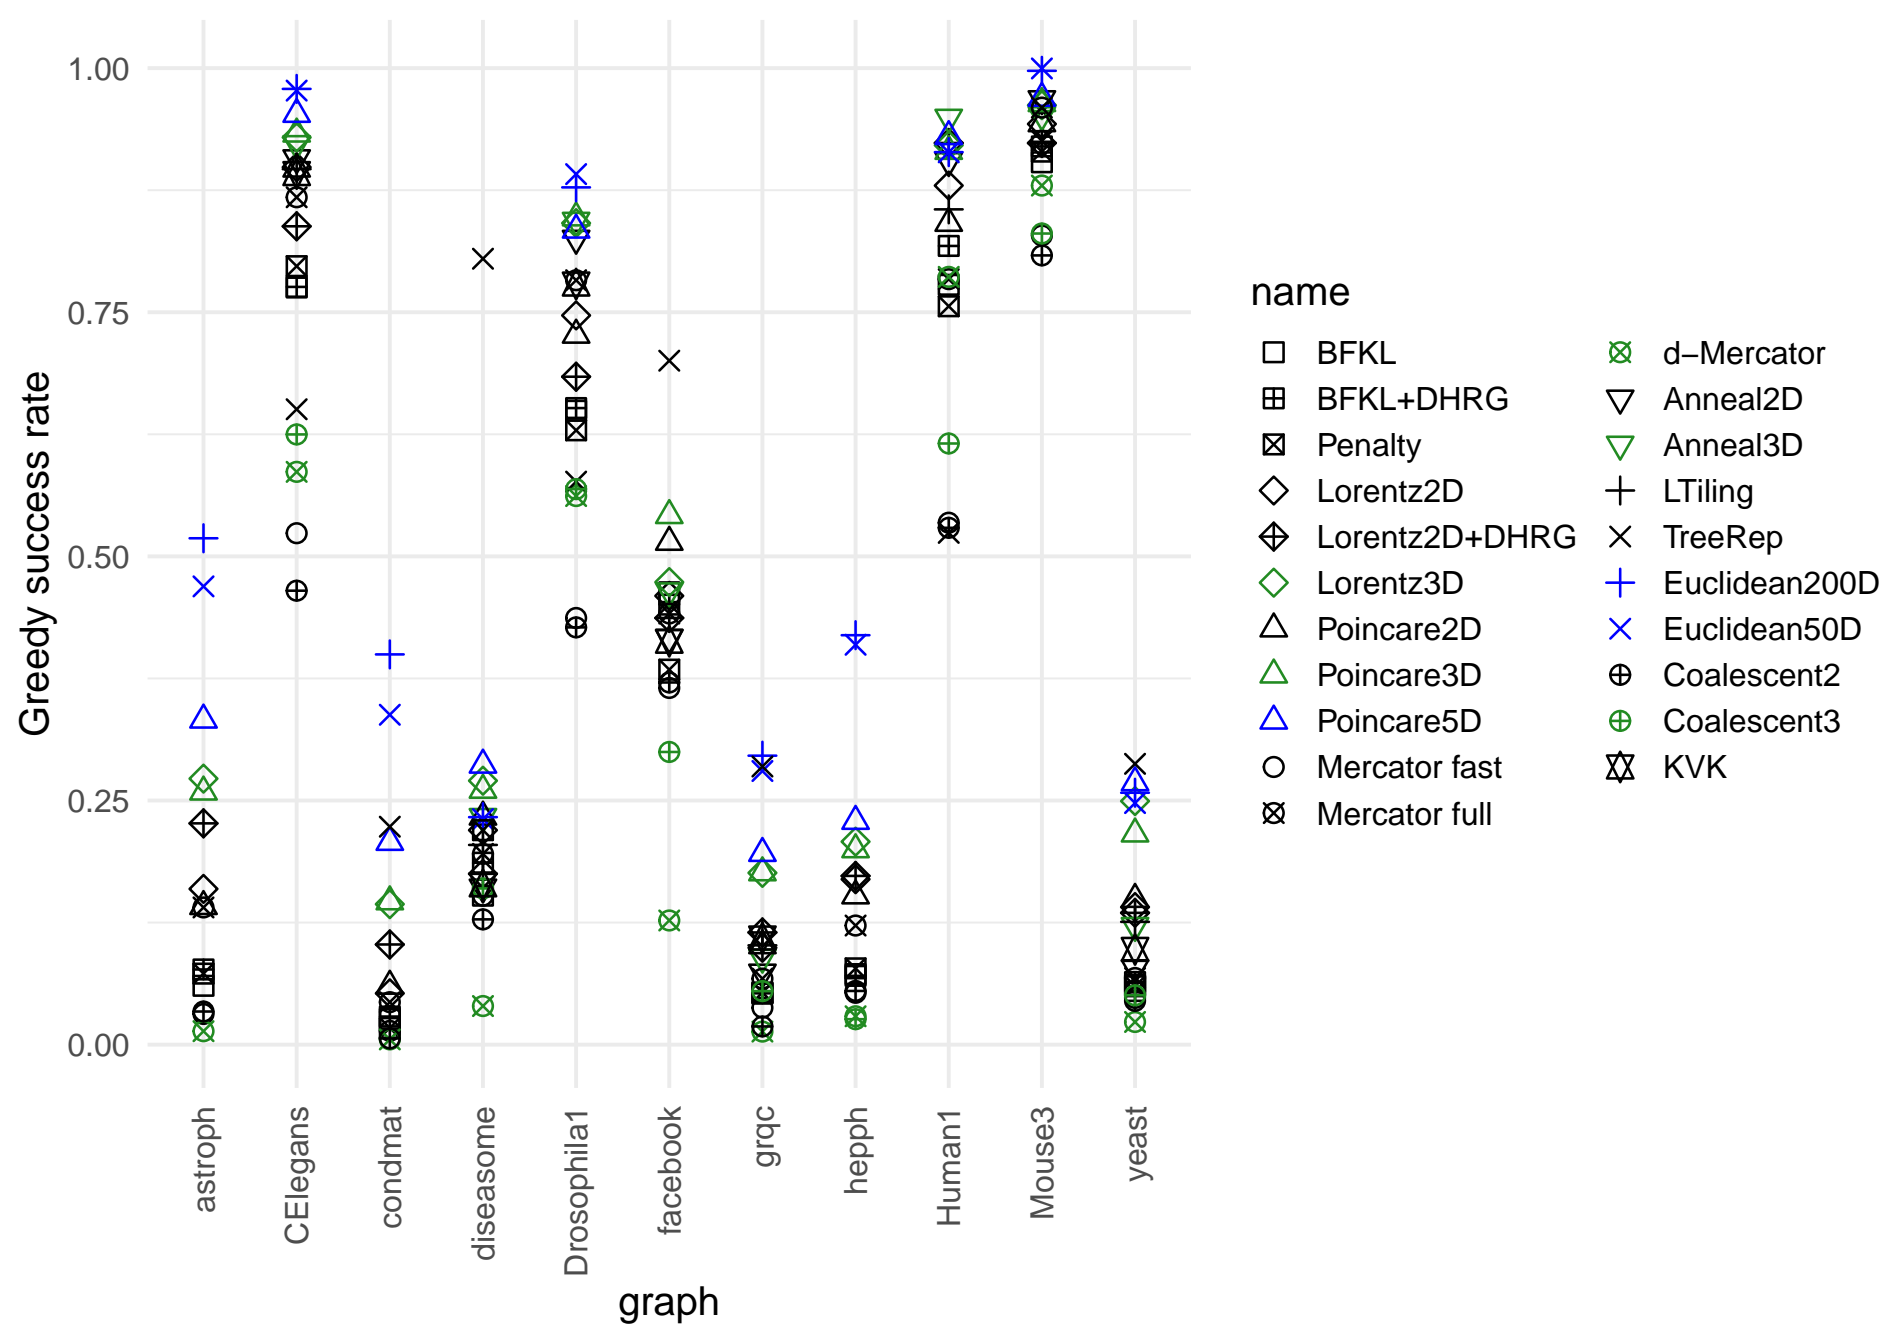

Supplement: supplementary_material [file real-world_success_short.pdf › bridging/tables/real-world_success_short.pdf]
